# Supplementary material for: JAK inhibition decreases the autoimmune burden in Down syndrome
Source: eLife. 2024 Dec 31;13:RP99323. doi: 10.7554/eLife.99323 (PMC11687933; doi:10.7554/eLife.99323)
Supplement: Figure 1—source data 1. [file elife-99323-fig1-data1.xlsx]

## Sheet: HTP Clinical Data 
ParticipantID	Karyotype	Sex	Age	Alopecia areata	Atopic dermatitis/Eczema	Celiac disease	Psoriasis	Vitiligo	Hidradenitis suppurativa	Folliculitis	Boils	Grave's hyperthyroidism	Hashimoto's hypothyroidism	Hyperthyroidism	Hypothyroidism	Subclinical hypothyroidism	Positive antimicrosomal antibodies	Positive TPO or Tg antibodies	Rheumatoid arthritis - adult	Other autoimmune disease	Guillain-Barr√© syndrome	Rheumatoid arthritis - juvenile	Myasthenia gravis	Systemic lupus erythematosus	Type 1 diabetes	Crohn's disease/Ulcerative colitis	Cushing's disease	Recurrent otitis media	Frequent/Recurrent pneumonia	Congenital heart defect repair	Acute lymphocytic leukemia (B-cell Precursor ALL)	Acute lymphocytic leukemia (T-cell ALL)	Acute lymphocytic leukemia (Unspecified ALL)	Acute megakaryoblastic leukemia (AMKL)	Acute myeloid leukemia (AML)	Chronic lymphocytic leukemia (CLL)	Chronic myeloid leukemia (CML)
HTP0003	T21	Male	24.7	FALSE	FALSE	FALSE	FALSE	FALSE	FALSE	FALSE	FALSE	FALSE	FALSE	FALSE	TRUE	FALSE	FALSE	FALSE	FALSE	FALSE	FALSE	FALSE	FALSE	FALSE	FALSE	FALSE	FALSE	FALSE	FALSE	TRUE	FALSE	FALSE	FALSE	FALSE	FALSE	FALSE	FALSE
HTP0005	T21	Male	34.6	FALSE	FALSE	FALSE	FALSE	FALSE	FALSE	FALSE	FALSE	FALSE	FALSE	FALSE	FALSE	FALSE	FALSE	FALSE	FALSE	FALSE	FALSE	FALSE	FALSE	FALSE	FALSE	FALSE	FALSE	FALSE	FALSE	NA	FALSE	FALSE	FALSE	FALSE	FALSE	FALSE	FALSE
HTP0012	T21	Female	42.9	FALSE	TRUE	FALSE	FALSE	FALSE	FALSE	FALSE	FALSE	FALSE	FALSE	FALSE	FALSE	FALSE	FALSE	FALSE	NA	FALSE	NA	NA	NA	FALSE	FALSE	NA	FALSE	NA	NA	NA	FALSE	FALSE	FALSE	FALSE	FALSE	FALSE	FALSE
HTP0015	T21	Male	28.5	FALSE	TRUE	FALSE	FALSE	FALSE	TRUE	TRUE	FALSE	TRUE	TRUE	FALSE	TRUE	FALSE	FALSE	FALSE	FALSE	FALSE	FALSE	FALSE	FALSE	FALSE	FALSE	FALSE	FALSE	FALSE	FALSE	TRUE	FALSE	FALSE	FALSE	FALSE	FALSE	FALSE	FALSE
HTP0017	T21	Female	21.3	FALSE	FALSE	FALSE	FALSE	FALSE	FALSE	FALSE	FALSE	FALSE	FALSE	FALSE	FALSE	FALSE	FALSE	FALSE	FALSE	FALSE	FALSE	FALSE	FALSE	FALSE	FALSE	FALSE	FALSE	FALSE	FALSE	NA	FALSE	FALSE	FALSE	FALSE	FALSE	FALSE	FALSE
HTP0020	T21	Female	32.3	FALSE	FALSE	FALSE	FALSE	FALSE	FALSE	FALSE	FALSE	FALSE	FALSE	FALSE	FALSE	FALSE	FALSE	FALSE	NA	FALSE	NA	NA	NA	FALSE	FALSE	FALSE	FALSE	NA	FALSE	NA	FALSE	FALSE	FALSE	FALSE	FALSE	FALSE	FALSE
HTP0023	T21	Female	35.1	FALSE	FALSE	FALSE	FALSE	FALSE	FALSE	FALSE	FALSE	FALSE	FALSE	FALSE	TRUE	FALSE	FALSE	FALSE	FALSE	FALSE	FALSE	FALSE	FALSE	FALSE	FALSE	FALSE	FALSE	FALSE	FALSE	NA	FALSE	FALSE	FALSE	FALSE	FALSE	FALSE	FALSE
HTP0025	T21	Female	23.9	FALSE	FALSE	FALSE	FALSE	FALSE	FALSE	FALSE	FALSE	FALSE	FALSE	FALSE	FALSE	FALSE	FALSE	FALSE	NA	FALSE	NA	NA	NA	FALSE	FALSE	FALSE	FALSE	TRUE	FALSE	FALSE	FALSE	FALSE	FALSE	FALSE	FALSE	FALSE	FALSE
HTP0027	T21	Male	38.1	FALSE	FALSE	FALSE	FALSE	FALSE	FALSE	FALSE	FALSE	FALSE	FALSE	FALSE	TRUE	FALSE	FALSE	FALSE	FALSE	FALSE	FALSE	FALSE	FALSE	FALSE	FALSE	FALSE	FALSE	FALSE	FALSE	NA	FALSE	FALSE	FALSE	FALSE	FALSE	FALSE	FALSE
HTP0030	T21	Male	26.4	FALSE	FALSE	FALSE	TRUE	FALSE	FALSE	TRUE	FALSE	FALSE	FALSE	FALSE	TRUE	FALSE	FALSE	FALSE	FALSE	FALSE	FALSE	FALSE	FALSE	FALSE	FALSE	FALSE	FALSE	FALSE	FALSE	NA	FALSE	FALSE	FALSE	FALSE	FALSE	FALSE	FALSE
HTP0032	T21	Female	21	FALSE	NA	FALSE	NA	FALSE	NA	FALSE	NA	FALSE	FALSE	FALSE	TRUE	TRUE	FALSE	FALSE	NA	FALSE	NA	NA	NA	FALSE	FALSE	NA	FALSE	NA	NA	TRUE	NA	NA	FALSE	FALSE	FALSE	FALSE	FALSE
HTP0036	T21	Female	30.7	FALSE	FALSE	TRUE	FALSE	FALSE	FALSE	FALSE	TRUE	FALSE	FALSE	FALSE	TRUE	FALSE	FALSE	FALSE	FALSE	FALSE	FALSE	FALSE	FALSE	FALSE	FALSE	FALSE	FALSE	FALSE	FALSE	NA	FALSE	FALSE	FALSE	FALSE	FALSE	FALSE	FALSE
HTP0045	T21	Female	29	FALSE	FALSE	FALSE	FALSE	FALSE	FALSE	FALSE	FALSE	FALSE	FALSE	FALSE	TRUE	FALSE	FALSE	FALSE	FALSE	FALSE	FALSE	FALSE	FALSE	FALSE	FALSE	FALSE	FALSE	FALSE	FALSE	NA	FALSE	FALSE	FALSE	FALSE	FALSE	FALSE	FALSE
HTP0050	T21	Female	20.7	FALSE	FALSE	TRUE	FALSE	FALSE	FALSE	TRUE	FALSE	FALSE	FALSE	FALSE	TRUE	FALSE	FALSE	FALSE	FALSE	FALSE	FALSE	FALSE	FALSE	FALSE	FALSE	FALSE	FALSE	FALSE	FALSE	NA	FALSE	FALSE	FALSE	FALSE	FALSE	FALSE	FALSE
HTP0052	T21	Female	28.7	FALSE	FALSE	FALSE	FALSE	FALSE	FALSE	FALSE	FALSE	FALSE	FALSE	FALSE	FALSE	FALSE	FALSE	FALSE	FALSE	FALSE	FALSE	FALSE	FALSE	FALSE	FALSE	FALSE	FALSE	FALSE	TRUE	FALSE	FALSE	FALSE	FALSE	FALSE	FALSE	FALSE	FALSE
HTP0053	T21	Female	25.1	FALSE	TRUE	FALSE	FALSE	FALSE	FALSE	FALSE	FALSE	FALSE	FALSE	FALSE	TRUE	FALSE	FALSE	FALSE	FALSE	FALSE	FALSE	FALSE	FALSE	FALSE	FALSE	NA	FALSE	FALSE	FALSE	TRUE	FALSE	FALSE	FALSE	FALSE	FALSE	FALSE	FALSE
HTP0054	T21	Male	20.5	FALSE	FALSE	FALSE	FALSE	FALSE	FALSE	FALSE	FALSE	FALSE	FALSE	FALSE	TRUE	FALSE	FALSE	FALSE	FALSE	FALSE	FALSE	FALSE	FALSE	FALSE	FALSE	FALSE	FALSE	FALSE	FALSE	NA	FALSE	FALSE	FALSE	FALSE	FALSE	FALSE	FALSE
HTP0065	T21	Female	44.1	FALSE	FALSE	FALSE	FALSE	FALSE	FALSE	TRUE	FALSE	FALSE	FALSE	FALSE	TRUE	FALSE	FALSE	FALSE	FALSE	FALSE	FALSE	FALSE	FALSE	FALSE	FALSE	FALSE	FALSE	FALSE	FALSE	NA	FALSE	FALSE	FALSE	FALSE	FALSE	FALSE	FALSE
HTP0066	T21	Male	13.1	TRUE	FALSE	FALSE	FALSE	FALSE	FALSE	TRUE	FALSE	FALSE	FALSE	FALSE	FALSE	FALSE	FALSE	FALSE	FALSE	FALSE	FALSE	FALSE	FALSE	FALSE	FALSE	FALSE	FALSE	FALSE	FALSE	NA	FALSE	FALSE	FALSE	FALSE	FALSE	FALSE	FALSE
HTP0070	T21	Male	22.5	FALSE	TRUE	TRUE	FALSE	FALSE	FALSE	TRUE	FALSE	FALSE	FALSE	FALSE	TRUE	FALSE	FALSE	FALSE	FALSE	FALSE	FALSE	FALSE	FALSE	FALSE	FALSE	FALSE	FALSE	FALSE	FALSE	NA	FALSE	FALSE	FALSE	FALSE	FALSE	FALSE	FALSE
HTP0073	T21	Male	53.6	FALSE	TRUE	TRUE	FALSE	FALSE	FALSE	FALSE	FALSE	FALSE	FALSE	FALSE	FALSE	FALSE	FALSE	FALSE	FALSE	FALSE	FALSE	FALSE	FALSE	FALSE	FALSE	FALSE	FALSE	FALSE	FALSE	NA	FALSE	FALSE	FALSE	FALSE	FALSE	FALSE	FALSE
HTP0080	T21	Female	33.8	TRUE	TRUE	TRUE	FALSE	FALSE	FALSE	TRUE	FALSE	FALSE	FALSE	FALSE	TRUE	FALSE	FALSE	FALSE	FALSE	FALSE	FALSE	FALSE	FALSE	FALSE	FALSE	FALSE	FALSE	FALSE	FALSE	TRUE	FALSE	FALSE	FALSE	FALSE	FALSE	FALSE	FALSE
HTP0081	T21	Female	7.9	FALSE	FALSE	FALSE	FALSE	FALSE	FALSE	FALSE	FALSE	FALSE	FALSE	FALSE	FALSE	FALSE	FALSE	FALSE	FALSE	FALSE	FALSE	FALSE	FALSE	FALSE	FALSE	FALSE	FALSE	FALSE	TRUE	NA	FALSE	FALSE	FALSE	FALSE	FALSE	FALSE	FALSE
HTP0084	T21	Male	34.2	FALSE	FALSE	FALSE	FALSE	FALSE	FALSE	FALSE	FALSE	FALSE	FALSE	FALSE	TRUE	FALSE	FALSE	FALSE	FALSE	FALSE	FALSE	FALSE	FALSE	FALSE	FALSE	FALSE	FALSE	FALSE	FALSE	NA	FALSE	FALSE	FALSE	FALSE	FALSE	FALSE	FALSE
HTP0093	T21	Male	2.1	FALSE	NA	FALSE	NA	FALSE	NA	FALSE	NA	FALSE	FALSE	FALSE	FALSE	FALSE	FALSE	FALSE	FALSE	FALSE	FALSE	FALSE	FALSE	FALSE	FALSE	FALSE	FALSE	FALSE	FALSE	NA	FALSE	FALSE	FALSE	FALSE	FALSE	FALSE	FALSE
HTP0101	T21	Female	30.1	FALSE	FALSE	FALSE	TRUE	FALSE	FALSE	FALSE	FALSE	FALSE	FALSE	FALSE	TRUE	FALSE	FALSE	FALSE	FALSE	FALSE	FALSE	FALSE	FALSE	FALSE	FALSE	FALSE	FALSE	TRUE	FALSE	NA	FALSE	FALSE	FALSE	FALSE	FALSE	FALSE	FALSE
HTP0103	T21	Female	0.5	FALSE	FALSE	FALSE	FALSE	FALSE	FALSE	FALSE	FALSE	FALSE	FALSE	FALSE	TRUE	FALSE	FALSE	FALSE	FALSE	FALSE	FALSE	FALSE	FALSE	FALSE	FALSE	FALSE	FALSE	FALSE	FALSE	NA	FALSE	FALSE	FALSE	FALSE	TRUE	FALSE	FALSE
HTP0107	T21	Female	31.3	FALSE	FALSE	FALSE	FALSE	FALSE	FALSE	FALSE	FALSE	FALSE	FALSE	FALSE	FALSE	FALSE	FALSE	FALSE	FALSE	FALSE	FALSE	FALSE	FALSE	FALSE	FALSE	FALSE	FALSE	FALSE	FALSE	NA	FALSE	FALSE	FALSE	FALSE	FALSE	FALSE	FALSE
HTP0109	T21	Female	46.7	FALSE	FALSE	FALSE	FALSE	FALSE	FALSE	FALSE	FALSE	FALSE	FALSE	FALSE	FALSE	FALSE	FALSE	FALSE	FALSE	FALSE	FALSE	FALSE	FALSE	FALSE	FALSE	FALSE	FALSE	FALSE	FALSE	NA	FALSE	FALSE	FALSE	FALSE	FALSE	FALSE	FALSE
HTP0112	T21	Female	34.7	FALSE	NA	FALSE	NA	FALSE	NA	FALSE	NA	NA	FALSE	FALSE	FALSE	FALSE	FALSE	FALSE	NA	FALSE	NA	NA	NA	FALSE	FALSE	NA	FALSE	FALSE	NA	NA	NA	NA	FALSE	FALSE	FALSE	FALSE	FALSE
HTP0115	T21	Male	1.8	FALSE	TRUE	FALSE	FALSE	FALSE	FALSE	FALSE	FALSE	FALSE	FALSE	FALSE	FALSE	FALSE	FALSE	FALSE	FALSE	FALSE	FALSE	FALSE	FALSE	FALSE	FALSE	FALSE	FALSE	FALSE	FALSE	TRUE	FALSE	FALSE	FALSE	FALSE	FALSE	FALSE	FALSE
HTP0116	T21	Male	8.7	FALSE	FALSE	FALSE	FALSE	FALSE	FALSE	FALSE	FALSE	FALSE	FALSE	FALSE	FALSE	FALSE	FALSE	FALSE	FALSE	FALSE	FALSE	FALSE	FALSE	FALSE	FALSE	FALSE	FALSE	TRUE	FALSE	NA	FALSE	FALSE	FALSE	FALSE	FALSE	FALSE	FALSE
HTP0119	T21	Female	50.9	FALSE	FALSE	FALSE	FALSE	FALSE	FALSE	FALSE	FALSE	FALSE	FALSE	FALSE	TRUE	FALSE	FALSE	FALSE	FALSE	FALSE	FALSE	FALSE	FALSE	FALSE	FALSE	FALSE	FALSE	FALSE	FALSE	NA	FALSE	FALSE	FALSE	FALSE	FALSE	FALSE	FALSE
HTP0123	T21	Female	21.4	FALSE	FALSE	FALSE	FALSE	FALSE	FALSE	TRUE	FALSE	FALSE	FALSE	FALSE	TRUE	FALSE	FALSE	FALSE	FALSE	FALSE	FALSE	FALSE	FALSE	FALSE	FALSE	FALSE	FALSE	FALSE	FALSE	TRUE	FALSE	FALSE	FALSE	FALSE	FALSE	FALSE	FALSE
HTP0129	T21	Female	22.7	FALSE	FALSE	TRUE	FALSE	FALSE	FALSE	TRUE	TRUE	NA	NA	NA	NA	NA	NA	NA	FALSE	FALSE	FALSE	FALSE	FALSE	FALSE	FALSE	NA	FALSE	NA	NA	NA	FALSE	FALSE	FALSE	FALSE	FALSE	FALSE	FALSE
HTP0139	T21	Male	21.3	FALSE	FALSE	FALSE	FALSE	FALSE	FALSE	FALSE	NA	FALSE	FALSE	TRUE	TRUE	FALSE	FALSE	FALSE	NA	FALSE	NA	NA	NA	FALSE	FALSE	NA	FALSE	FALSE	FALSE	TRUE	NA	NA	FALSE	FALSE	FALSE	FALSE	FALSE
HTP0141	T21	Male	21.9	NA	FALSE	NA	TRUE	NA	FALSE	FALSE	FALSE	FALSE	FALSE	FALSE	TRUE	FALSE	FALSE	FALSE	NA	NA	NA	NA	NA	NA	FALSE	NA	NA	NA	NA	NA	FALSE	FALSE	FALSE	FALSE	FALSE	FALSE	FALSE
HTP0143	T21	Female	9.5	FALSE	FALSE	TRUE	FALSE	FALSE	FALSE	TRUE	FALSE	FALSE	FALSE	FALSE	FALSE	FALSE	FALSE	FALSE	FALSE	FALSE	FALSE	FALSE	FALSE	FALSE	FALSE	FALSE	FALSE	FALSE	FALSE	NA	FALSE	FALSE	FALSE	FALSE	FALSE	FALSE	FALSE
HTP0151	T21	Male	27.4	FALSE	FALSE	FALSE	FALSE	FALSE	TRUE	FALSE	FALSE	FALSE	FALSE	FALSE	FALSE	FALSE	FALSE	FALSE	FALSE	TRUE	FALSE	FALSE	FALSE	FALSE	FALSE	FALSE	FALSE	TRUE	TRUE	FALSE	TRUE	FALSE	TRUE	FALSE	FALSE	FALSE	FALSE
HTP0154	T21	Male	10.7	FALSE	NA	FALSE	NA	FALSE	NA	FALSE	NA	NA	FALSE	FALSE	FALSE	FALSE	FALSE	FALSE	NA	FALSE	NA	NA	NA	FALSE	FALSE	NA	FALSE	NA	NA	NA	NA	NA	FALSE	FALSE	FALSE	FALSE	FALSE
HTP0155	T21	Female	9.7	FALSE	TRUE	FALSE	FALSE	FALSE	FALSE	FALSE	FALSE	NA	FALSE	FALSE	FALSE	FALSE	FALSE	FALSE	FALSE	FALSE	FALSE	FALSE	FALSE	FALSE	FALSE	FALSE	FALSE	TRUE	FALSE	NA	FALSE	FALSE	FALSE	FALSE	FALSE	FALSE	FALSE
HTP0165	T21	Female	8.7	FALSE	TRUE	FALSE	NA	FALSE	NA	FALSE	NA	NA	FALSE	FALSE	FALSE	FALSE	FALSE	FALSE	NA	FALSE	NA	NA	NA	FALSE	FALSE	NA	FALSE	NA	NA	NA	NA	NA	FALSE	FALSE	FALSE	FALSE	FALSE
HTP0175	T21	Male	22.2	FALSE	FALSE	FALSE	FALSE	FALSE	FALSE	FALSE	FALSE	FALSE	FALSE	FALSE	TRUE	FALSE	FALSE	FALSE	FALSE	FALSE	FALSE	FALSE	FALSE	FALSE	FALSE	FALSE	FALSE	FALSE	FALSE	NA	FALSE	FALSE	FALSE	FALSE	FALSE	FALSE	FALSE
HTP0176	T21	Female	20.8	FALSE	FALSE	FALSE	FALSE	FALSE	FALSE	FALSE	FALSE	FALSE	FALSE	FALSE	FALSE	FALSE	FALSE	FALSE	FALSE	FALSE	FALSE	FALSE	FALSE	FALSE	FALSE	FALSE	FALSE	FALSE	FALSE	NA	FALSE	FALSE	FALSE	FALSE	FALSE	FALSE	FALSE
HTP0179	T21	Male	26.5	FALSE	FALSE	FALSE	FALSE	FALSE	FALSE	FALSE	FALSE	FALSE	FALSE	FALSE	FALSE	FALSE	FALSE	FALSE	FALSE	FALSE	FALSE	FALSE	FALSE	FALSE	FALSE	FALSE	FALSE	TRUE	FALSE	NA	FALSE	FALSE	FALSE	FALSE	FALSE	FALSE	FALSE
HTP0180	T21	Male	20	FALSE	FALSE	FALSE	FALSE	FALSE	FALSE	FALSE	NA	FALSE	FALSE	FALSE	FALSE	FALSE	FALSE	FALSE	NA	FALSE	NA	NA	NA	FALSE	FALSE	NA	FALSE	NA	FALSE	NA	FALSE	FALSE	FALSE	FALSE	FALSE	FALSE	FALSE
HTP0183	T21	Female	10.1	NA	NA	NA	NA	NA	NA	NA	NA	FALSE	FALSE	FALSE	TRUE	FALSE	FALSE	FALSE	NA	NA	NA	NA	NA	NA	FALSE	NA	NA	NA	NA	NA	FALSE	FALSE	FALSE	FALSE	FALSE	FALSE	FALSE
HTP0186	T21	Male	11.7	FALSE	FALSE	FALSE	FALSE	FALSE	FALSE	FALSE	FALSE	FALSE	FALSE	FALSE	FALSE	FALSE	FALSE	FALSE	FALSE	FALSE	FALSE	FALSE	FALSE	FALSE	FALSE	FALSE	FALSE	FALSE	FALSE	FALSE	FALSE	FALSE	FALSE	FALSE	FALSE	FALSE	FALSE
HTP0191	T21	Male	17.3	FALSE	NA	FALSE	NA	FALSE	NA	FALSE	NA	NA	FALSE	FALSE	FALSE	FALSE	FALSE	FALSE	NA	FALSE	NA	NA	NA	FALSE	FALSE	NA	FALSE	NA	NA	NA	NA	NA	FALSE	FALSE	FALSE	FALSE	FALSE
HTP0195	T21	Male	8.6	FALSE	TRUE	FALSE	FALSE	FALSE	FALSE	FALSE	FALSE	FALSE	FALSE	FALSE	TRUE	FALSE	FALSE	FALSE	FALSE	FALSE	FALSE	FALSE	FALSE	FALSE	FALSE	FALSE	FALSE	TRUE	FALSE	TRUE	FALSE	FALSE	FALSE	FALSE	FALSE	FALSE	FALSE
HTP0196	T21	Male	27.1	FALSE	FALSE	FALSE	FALSE	FALSE	FALSE	FALSE	FALSE	FALSE	FALSE	FALSE	FALSE	FALSE	FALSE	FALSE	FALSE	FALSE	FALSE	FALSE	FALSE	FALSE	FALSE	FALSE	FALSE	TRUE	NA	NA	FALSE	FALSE	FALSE	FALSE	FALSE	FALSE	FALSE
HTP0197	T21	Male	7.4	NA	NA	NA	NA	NA	NA	NA	NA	NA	NA	NA	NA	NA	NA	NA	NA	NA	NA	NA	NA	NA	NA	NA	NA	TRUE	NA	NA	NA	NA	NA	NA	NA	NA	NA
HTP0198	T21	Male	34.1	FALSE	FALSE	FALSE	FALSE	FALSE	FALSE	TRUE	FALSE	FALSE	FALSE	FALSE	TRUE	FALSE	FALSE	FALSE	FALSE	FALSE	FALSE	FALSE	FALSE	FALSE	FALSE	FALSE	FALSE	FALSE	FALSE	NA	FALSE	FALSE	FALSE	FALSE	FALSE	FALSE	FALSE
HTP0201	T21	Female	2.5	FALSE	NA	FALSE	NA	FALSE	NA	FALSE	NA	NA	FALSE	FALSE	FALSE	FALSE	FALSE	FALSE	NA	FALSE	NA	NA	NA	FALSE	FALSE	NA	FALSE	NA	NA	NA	NA	NA	FALSE	FALSE	FALSE	FALSE	FALSE
HTP0203	T21	Male	7.1	FALSE	TRUE	FALSE	FALSE	FALSE	FALSE	FALSE	FALSE	FALSE	FALSE	FALSE	FALSE	FALSE	FALSE	FALSE	FALSE	FALSE	FALSE	FALSE	FALSE	FALSE	FALSE	FALSE	FALSE	FALSE	FALSE	NA	FALSE	FALSE	FALSE	FALSE	FALSE	FALSE	FALSE
HTP0204	T21	Male	13.1	FALSE	FALSE	FALSE	FALSE	FALSE	FALSE	FALSE	FALSE	FALSE	FALSE	FALSE	FALSE	TRUE	FALSE	FALSE	FALSE	FALSE	FALSE	FALSE	FALSE	FALSE	FALSE	FALSE	FALSE	FALSE	FALSE	NA	FALSE	FALSE	FALSE	FALSE	FALSE	FALSE	FALSE
HTP0207	T21	Female	23	FALSE	FALSE	FALSE	FALSE	FALSE	FALSE	FALSE	FALSE	FALSE	FALSE	FALSE	FALSE	FALSE	FALSE	FALSE	FALSE	FALSE	FALSE	FALSE	FALSE	FALSE	FALSE	FALSE	FALSE	FALSE	TRUE	NA	TRUE	FALSE	FALSE	FALSE	FALSE	FALSE	FALSE
HTP0211	T21	Male	27.7	FALSE	NA	FALSE	NA	FALSE	NA	FALSE	NA	NA	FALSE	FALSE	TRUE	FALSE	FALSE	FALSE	NA	FALSE	NA	NA	NA	FALSE	FALSE	NA	FALSE	NA	NA	NA	NA	NA	FALSE	FALSE	FALSE	FALSE	FALSE
HTP0212	T21	Male	22.2	FALSE	FALSE	FALSE	FALSE	FALSE	FALSE	FALSE	FALSE	FALSE	FALSE	FALSE	FALSE	FALSE	FALSE	FALSE	FALSE	FALSE	FALSE	FALSE	FALSE	FALSE	FALSE	FALSE	FALSE	FALSE	FALSE	TRUE	FALSE	FALSE	FALSE	FALSE	FALSE	FALSE	FALSE
HTP0213	T21	Male	44.3	FALSE	NA	FALSE	NA	FALSE	NA	FALSE	NA	NA	FALSE	FALSE	FALSE	FALSE	FALSE	FALSE	NA	FALSE	NA	NA	NA	FALSE	FALSE	NA	FALSE	NA	NA	NA	NA	NA	FALSE	FALSE	FALSE	FALSE	FALSE
HTP0215	T21	Male	15.9	FALSE	FALSE	FALSE	FALSE	FALSE	FALSE	FALSE	FALSE	FALSE	FALSE	FALSE	FALSE	FALSE	FALSE	FALSE	FALSE	FALSE	FALSE	FALSE	FALSE	FALSE	FALSE	FALSE	FALSE	TRUE	FALSE	NA	FALSE	FALSE	FALSE	FALSE	FALSE	FALSE	FALSE
HTP0217	T21	Male	17.4	FALSE	NA	FALSE	NA	FALSE	NA	FALSE	NA	NA	FALSE	FALSE	FALSE	FALSE	FALSE	FALSE	NA	FALSE	NA	NA	NA	FALSE	FALSE	NA	FALSE	NA	NA	TRUE	NA	NA	FALSE	FALSE	FALSE	FALSE	FALSE
HTP0218	T21	Female	20.9	FALSE	FALSE	FALSE	FALSE	FALSE	FALSE	FALSE	FALSE	FALSE	FALSE	FALSE	TRUE	FALSE	FALSE	FALSE	FALSE	FALSE	FALSE	FALSE	FALSE	FALSE	FALSE	FALSE	FALSE	FALSE	FALSE	NA	FALSE	FALSE	FALSE	FALSE	FALSE	FALSE	FALSE
HTP0219	T21	Female	18.5	FALSE	FALSE	TRUE	FALSE	FALSE	FALSE	FALSE	FALSE	FALSE	TRUE	FALSE	TRUE	TRUE	FALSE	TRUE	FALSE	FALSE	FALSE	FALSE	FALSE	FALSE	FALSE	FALSE	FALSE	TRUE	FALSE	NA	FALSE	FALSE	FALSE	FALSE	FALSE	FALSE	FALSE
HTP0220	T21	Male	28.6	FALSE	NA	FALSE	NA	FALSE	NA	FALSE	NA	NA	FALSE	FALSE	TRUE	FALSE	FALSE	FALSE	NA	FALSE	NA	NA	NA	FALSE	FALSE	NA	FALSE	NA	NA	NA	NA	NA	FALSE	FALSE	FALSE	FALSE	FALSE
HTP0221	T21	Male	28.7	FALSE	NA	FALSE	NA	FALSE	NA	FALSE	NA	NA	FALSE	FALSE	FALSE	FALSE	FALSE	FALSE	NA	FALSE	NA	NA	NA	FALSE	FALSE	NA	FALSE	NA	NA	NA	NA	NA	FALSE	FALSE	FALSE	FALSE	FALSE
HTP0222	T21	Female	26.2	FALSE	FALSE	FALSE	FALSE	FALSE	FALSE	FALSE	FALSE	FALSE	TRUE	FALSE	TRUE	FALSE	FALSE	FALSE	FALSE	FALSE	FALSE	FALSE	FALSE	FALSE	TRUE	FALSE	FALSE	FALSE	FALSE	NA	FALSE	FALSE	FALSE	FALSE	FALSE	FALSE	FALSE
HTP0223	T21	Male	34.9	FALSE	FALSE	FALSE	FALSE	FALSE	FALSE	FALSE	FALSE	FALSE	FALSE	FALSE	TRUE	FALSE	FALSE	FALSE	FALSE	FALSE	FALSE	FALSE	FALSE	FALSE	FALSE	FALSE	FALSE	FALSE	FALSE	NA	FALSE	FALSE	FALSE	FALSE	FALSE	FALSE	FALSE
HTP0224	T21	Male	14.3	FALSE	NA	FALSE	NA	FALSE	NA	FALSE	NA	FALSE	FALSE	FALSE	TRUE	FALSE	FALSE	FALSE	NA	FALSE	NA	NA	NA	FALSE	FALSE	NA	FALSE	NA	NA	TRUE	NA	NA	FALSE	FALSE	FALSE	FALSE	FALSE
HTP0226	T21	Male	50.4	FALSE	NA	FALSE	NA	FALSE	NA	FALSE	NA	NA	FALSE	FALSE	FALSE	FALSE	FALSE	FALSE	NA	FALSE	NA	NA	NA	FALSE	FALSE	NA	FALSE	NA	NA	NA	NA	NA	FALSE	FALSE	FALSE	FALSE	FALSE
HTP0227	T21	Female	52.1	TRUE	FALSE	FALSE	FALSE	FALSE	FALSE	FALSE	FALSE	FALSE	FALSE	FALSE	TRUE	FALSE	FALSE	FALSE	FALSE	FALSE	FALSE	FALSE	FALSE	FALSE	FALSE	FALSE	FALSE	FALSE	FALSE	NA	FALSE	FALSE	FALSE	FALSE	FALSE	FALSE	FALSE
HTP0228	T21	Male	56.2	FALSE	TRUE	FALSE	NA	FALSE	NA	FALSE	NA	NA	FALSE	FALSE	FALSE	FALSE	FALSE	FALSE	NA	FALSE	NA	NA	NA	FALSE	FALSE	NA	FALSE	NA	NA	NA	NA	NA	FALSE	FALSE	FALSE	FALSE	FALSE
HTP0229	T21	Male	35.2	FALSE	FALSE	FALSE	FALSE	FALSE	FALSE	TRUE	FALSE	FALSE	FALSE	FALSE	FALSE	FALSE	FALSE	FALSE	FALSE	FALSE	FALSE	FALSE	FALSE	FALSE	FALSE	NA	FALSE	NA	NA	NA	FALSE	FALSE	FALSE	FALSE	FALSE	FALSE	FALSE
HTP0230	T21	Female	38.6	FALSE	NA	FALSE	NA	FALSE	NA	FALSE	NA	FALSE	FALSE	FALSE	TRUE	FALSE	FALSE	FALSE	NA	TRUE	NA	NA	NA	FALSE	FALSE	NA	FALSE	NA	NA	TRUE	NA	NA	FALSE	FALSE	FALSE	FALSE	FALSE
HTP0232	T21	Female	25	FALSE	TRUE	FALSE	FALSE	FALSE	FALSE	FALSE	FALSE	FALSE	FALSE	FALSE	FALSE	FALSE	FALSE	FALSE	FALSE	FALSE	FALSE	FALSE	FALSE	FALSE	FALSE	FALSE	FALSE	FALSE	FALSE	TRUE	FALSE	FALSE	FALSE	FALSE	FALSE	FALSE	FALSE
HTP0233	T21	Female	34.3	FALSE	TRUE	FALSE	TRUE	FALSE	TRUE	FALSE	FALSE	FALSE	TRUE	FALSE	TRUE	FALSE	FALSE	TRUE	FALSE	FALSE	FALSE	FALSE	FALSE	FALSE	FALSE	FALSE	FALSE	FALSE	TRUE	NA	FALSE	FALSE	FALSE	FALSE	TRUE	FALSE	FALSE
HTP0234	T21	Male	35.2	FALSE	FALSE	FALSE	FALSE	FALSE	NA	FALSE	NA	FALSE	FALSE	FALSE	TRUE	NA	NA	NA	NA	FALSE	NA	NA	NA	FALSE	FALSE	NA	FALSE	NA	FALSE	NA	FALSE	FALSE	FALSE	FALSE	FALSE	FALSE	FALSE
HTP0235	T21	Female	33	FALSE	FALSE	FALSE	FALSE	FALSE	FALSE	FALSE	FALSE	FALSE	FALSE	FALSE	TRUE	FALSE	FALSE	FALSE	FALSE	FALSE	FALSE	FALSE	FALSE	FALSE	FALSE	FALSE	FALSE	FALSE	FALSE	NA	FALSE	FALSE	FALSE	FALSE	FALSE	FALSE	FALSE
HTP0236	T21	Male	10.4	FALSE	NA	FALSE	NA	FALSE	NA	FALSE	NA	FALSE	FALSE	FALSE	TRUE	FALSE	FALSE	FALSE	NA	FALSE	NA	NA	NA	FALSE	FALSE	NA	FALSE	NA	NA	FALSE	NA	NA	FALSE	FALSE	FALSE	FALSE	FALSE
HTP0237	T21	Male	5.7	FALSE	NA	FALSE	NA	FALSE	NA	FALSE	NA	FALSE	FALSE	FALSE	TRUE	FALSE	FALSE	FALSE	NA	FALSE	NA	NA	NA	FALSE	FALSE	NA	FALSE	NA	NA	NA	FALSE	FALSE	FALSE	FALSE	FALSE	FALSE	FALSE
HTP0238	T21	Male	39.5	FALSE	FALSE	FALSE	FALSE	FALSE	FALSE	FALSE	FALSE	FALSE	FALSE	FALSE	TRUE	FALSE	FALSE	FALSE	FALSE	FALSE	FALSE	FALSE	FALSE	FALSE	FALSE	FALSE	FALSE	FALSE	FALSE	NA	FALSE	FALSE	FALSE	FALSE	FALSE	FALSE	FALSE
HTP0239	T21	Female	32.9	FALSE	NA	FALSE	NA	FALSE	NA	NA	NA	NA	NA	NA	NA	NA	NA	NA	FALSE	FALSE	FALSE	FALSE	FALSE	FALSE	FALSE	NA	NA	NA	NA	NA	NA	NA	NA	NA	NA	NA	NA
HTP0240	T21	Male	39.1	FALSE	NA	FALSE	NA	TRUE	NA	NA	NA	NA	NA	NA	NA	NA	NA	NA	FALSE	FALSE	FALSE	FALSE	FALSE	FALSE	FALSE	NA	NA	NA	NA	NA	NA	NA	FALSE	FALSE	FALSE	FALSE	FALSE
HTP0241	T21	Female	16.9	FALSE	FALSE	FALSE	FALSE	FALSE	FALSE	FALSE	FALSE	FALSE	FALSE	FALSE	TRUE	FALSE	FALSE	FALSE	FALSE	FALSE	FALSE	FALSE	FALSE	FALSE	FALSE	FALSE	FALSE	FALSE	FALSE	NA	FALSE	FALSE	FALSE	FALSE	FALSE	FALSE	FALSE
HTP0243	T21	Female	13.2	FALSE	NA	FALSE	NA	FALSE	NA	FALSE	NA	NA	FALSE	FALSE	FALSE	FALSE	FALSE	FALSE	NA	FALSE	NA	NA	NA	FALSE	FALSE	FALSE	FALSE	FALSE	NA	FALSE	NA	NA	FALSE	FALSE	FALSE	FALSE	FALSE
HTP0244	T21	Male	5.3	FALSE	FALSE	FALSE	FALSE	FALSE	FALSE	FALSE	FALSE	FALSE	FALSE	FALSE	FALSE	FALSE	FALSE	FALSE	FALSE	FALSE	FALSE	FALSE	FALSE	FALSE	FALSE	FALSE	FALSE	FALSE	FALSE	NA	FALSE	FALSE	FALSE	FALSE	FALSE	FALSE	FALSE
HTP0245	T21	Female	30.3	FALSE	TRUE	FALSE	FALSE	FALSE	TRUE	TRUE	FALSE	FALSE	FALSE	FALSE	TRUE	FALSE	FALSE	FALSE	FALSE	FALSE	FALSE	FALSE	FALSE	FALSE	FALSE	NA	FALSE	FALSE	NA	NA	FALSE	FALSE	FALSE	FALSE	FALSE	FALSE	FALSE
HTP0247	T21	Male	21.5	FALSE	FALSE	FALSE	FALSE	FALSE	FALSE	FALSE	FALSE	FALSE	TRUE	FALSE	TRUE	FALSE	FALSE	FALSE	FALSE	FALSE	FALSE	FALSE	FALSE	FALSE	FALSE	FALSE	FALSE	FALSE	FALSE	NA	FALSE	FALSE	FALSE	FALSE	FALSE	FALSE	FALSE
HTP0249	T21	Female	33.1	FALSE	FALSE	FALSE	FALSE	FALSE	FALSE	FALSE	FALSE	FALSE	FALSE	FALSE	TRUE	FALSE	FALSE	FALSE	FALSE	FALSE	FALSE	FALSE	FALSE	FALSE	FALSE	FALSE	FALSE	FALSE	FALSE	NA	FALSE	FALSE	FALSE	FALSE	FALSE	FALSE	FALSE
HTP0250	T21	Male	31	FALSE	NA	FALSE	NA	FALSE	NA	FALSE	NA	NA	FALSE	FALSE	FALSE	FALSE	FALSE	FALSE	NA	FALSE	NA	NA	NA	FALSE	FALSE	NA	FALSE	NA	NA	NA	NA	NA	FALSE	FALSE	FALSE	FALSE	FALSE
HTP0251	T21	Female	33.3	TRUE	NA	FALSE	NA	FALSE	NA	FALSE	NA	FALSE	FALSE	FALSE	TRUE	FALSE	FALSE	FALSE	FALSE	FALSE	FALSE	FALSE	FALSE	FALSE	FALSE	NA	FALSE	NA	NA	NA	NA	NA	FALSE	FALSE	FALSE	FALSE	FALSE
HTP0253	T21	Female	31.5	FALSE	NA	FALSE	NA	FALSE	NA	FALSE	NA	NA	FALSE	FALSE	FALSE	FALSE	FALSE	FALSE	NA	FALSE	NA	NA	NA	FALSE	FALSE	NA	FALSE	NA	NA	TRUE	NA	NA	FALSE	FALSE	FALSE	FALSE	FALSE
HTP0254	T21	Male	31.9	FALSE	FALSE	FALSE	FALSE	FALSE	FALSE	FALSE	NA	FALSE	FALSE	FALSE	FALSE	FALSE	FALSE	FALSE	NA	FALSE	NA	NA	NA	FALSE	FALSE	NA	FALSE	NA	TRUE	NA	NA	NA	FALSE	FALSE	FALSE	FALSE	FALSE
HTP0256	T21	Male	27.6	FALSE	NA	FALSE	NA	FALSE	NA	FALSE	NA	NA	FALSE	FALSE	FALSE	FALSE	FALSE	FALSE	NA	FALSE	NA	NA	NA	FALSE	FALSE	NA	FALSE	NA	NA	NA	FALSE	FALSE	FALSE	FALSE	FALSE	FALSE	FALSE
HTP0257	T21	Male	26.2	FALSE	TRUE	FALSE	FALSE	TRUE	FALSE	TRUE	FALSE	FALSE	FALSE	FALSE	TRUE	FALSE	FALSE	FALSE	FALSE	FALSE	FALSE	FALSE	FALSE	FALSE	FALSE	NA	NA	FALSE	NA	NA	FALSE	FALSE	FALSE	FALSE	FALSE	FALSE	FALSE
HTP0258	T21	Male	14	FALSE	NA	FALSE	NA	FALSE	NA	FALSE	NA	NA	FALSE	FALSE	FALSE	FALSE	FALSE	FALSE	NA	FALSE	NA	NA	NA	FALSE	FALSE	NA	FALSE	FALSE	NA	NA	NA	NA	FALSE	FALSE	FALSE	FALSE	FALSE
HTP0259	T21	Female	30.8	FALSE	NA	FALSE	NA	FALSE	NA	FALSE	NA	FALSE	FALSE	FALSE	TRUE	FALSE	FALSE	FALSE	NA	FALSE	NA	NA	NA	FALSE	FALSE	NA	FALSE	NA	NA	TRUE	NA	NA	FALSE	FALSE	FALSE	FALSE	FALSE
HTP0260	T21	Female	24.3	FALSE	NA	FALSE	NA	FALSE	NA	FALSE	NA	NA	FALSE	FALSE	FALSE	FALSE	FALSE	FALSE	NA	FALSE	NA	NA	NA	FALSE	FALSE	NA	FALSE	NA	NA	NA	NA	NA	FALSE	FALSE	FALSE	FALSE	FALSE
HTP0261	T21	Male	22	FALSE	FALSE	TRUE	FALSE	FALSE	FALSE	FALSE	FALSE	FALSE	FALSE	FALSE	FALSE	FALSE	FALSE	TRUE	FALSE	FALSE	FALSE	FALSE	FALSE	FALSE	FALSE	FALSE	FALSE	FALSE	FALSE	NA	FALSE	FALSE	FALSE	FALSE	FALSE	FALSE	FALSE
HTP0262	T21	Female	13.3	FALSE	FALSE	FALSE	FALSE	FALSE	FALSE	FALSE	FALSE	FALSE	FALSE	FALSE	FALSE	FALSE	FALSE	FALSE	FALSE	FALSE	FALSE	FALSE	FALSE	FALSE	FALSE	FALSE	FALSE	FALSE	FALSE	NA	FALSE	FALSE	FALSE	FALSE	FALSE	FALSE	FALSE
HTP0263	T21	Female	11.4	FALSE	FALSE	FALSE	FALSE	FALSE	FALSE	FALSE	FALSE	FALSE	FALSE	FALSE	TRUE	FALSE	FALSE	FALSE	FALSE	FALSE	FALSE	FALSE	FALSE	FALSE	FALSE	FALSE	FALSE	TRUE	FALSE	NA	FALSE	FALSE	FALSE	FALSE	FALSE	FALSE	FALSE
HTP0264	T21	Male	21.1	FALSE	TRUE	FALSE	FALSE	FALSE	FALSE	FALSE	FALSE	NA	NA	NA	NA	NA	NA	NA	FALSE	FALSE	FALSE	FALSE	FALSE	FALSE	FALSE	NA	FALSE	FALSE	FALSE	NA	FALSE	FALSE	FALSE	FALSE	FALSE	FALSE	FALSE
HTP0265	T21	Male	8.9	TRUE	NA	FALSE	NA	FALSE	NA	FALSE	NA	NA	FALSE	FALSE	FALSE	FALSE	FALSE	FALSE	NA	FALSE	NA	NA	NA	FALSE	FALSE	NA	FALSE	NA	NA	NA	FALSE	FALSE	FALSE	FALSE	FALSE	FALSE	FALSE
HTP0266	T21	Female	6.7	FALSE	FALSE	FALSE	FALSE	FALSE	FALSE	FALSE	FALSE	FALSE	FALSE	FALSE	FALSE	FALSE	FALSE	FALSE	FALSE	FALSE	FALSE	FALSE	FALSE	FALSE	FALSE	FALSE	FALSE	FALSE	FALSE	NA	FALSE	FALSE	FALSE	FALSE	FALSE	FALSE	FALSE
HTP0267	T21	Male	12.1	FALSE	FALSE	FALSE	FALSE	FALSE	FALSE	FALSE	FALSE	FALSE	FALSE	FALSE	FALSE	FALSE	FALSE	FALSE	FALSE	FALSE	FALSE	FALSE	FALSE	FALSE	FALSE	FALSE	FALSE	TRUE	FALSE	NA	FALSE	FALSE	FALSE	FALSE	FALSE	FALSE	FALSE
HTP0268	T21	Female	22.7	FALSE	NA	FALSE	NA	FALSE	NA	FALSE	NA	NA	FALSE	FALSE	FALSE	FALSE	FALSE	FALSE	NA	FALSE	NA	NA	NA	FALSE	FALSE	NA	FALSE	NA	NA	NA	FALSE	FALSE	FALSE	FALSE	FALSE	FALSE	FALSE
HTP0269	T21	Female	27.1	TRUE	NA	FALSE	NA	FALSE	NA	FALSE	NA	NA	FALSE	FALSE	FALSE	FALSE	FALSE	FALSE	NA	FALSE	NA	NA	NA	FALSE	FALSE	NA	FALSE	NA	NA	NA	NA	NA	FALSE	FALSE	FALSE	FALSE	FALSE
HTP0270	T21	Male	14.3	FALSE	NA	FALSE	NA	FALSE	NA	FALSE	NA	NA	FALSE	FALSE	TRUE	FALSE	FALSE	FALSE	FALSE	FALSE	FALSE	FALSE	FALSE	FALSE	TRUE	NA	FALSE	NA	NA	FALSE	NA	NA	FALSE	FALSE	FALSE	FALSE	FALSE
HTP0272	T21	Male	43.5	FALSE	FALSE	FALSE	FALSE	FALSE	FALSE	FALSE	FALSE	FALSE	FALSE	FALSE	FALSE	FALSE	FALSE	FALSE	FALSE	FALSE	FALSE	FALSE	FALSE	FALSE	FALSE	FALSE	FALSE	FALSE	FALSE	NA	FALSE	FALSE	FALSE	FALSE	TRUE	FALSE	FALSE
HTP0273	T21	Female	19.9	FALSE	TRUE	FALSE	FALSE	FALSE	TRUE	FALSE	FALSE	FALSE	FALSE	FALSE	TRUE	FALSE	FALSE	FALSE	FALSE	TRUE	FALSE	FALSE	FALSE	FALSE	FALSE	FALSE	NA	FALSE	FALSE	NA	FALSE	FALSE	FALSE	FALSE	FALSE	FALSE	FALSE
HTP0274	T21	Male	17.5	FALSE	FALSE	FALSE	FALSE	FALSE	FALSE	FALSE	FALSE	FALSE	FALSE	FALSE	FALSE	FALSE	FALSE	FALSE	FALSE	FALSE	FALSE	FALSE	FALSE	FALSE	FALSE	FALSE	FALSE	FALSE	FALSE	NA	FALSE	FALSE	FALSE	FALSE	FALSE	FALSE	FALSE
HTP0275	T21	Male	29.9	FALSE	NA	FALSE	NA	FALSE	NA	FALSE	NA	NA	FALSE	FALSE	FALSE	FALSE	FALSE	FALSE	NA	FALSE	NA	NA	NA	FALSE	FALSE	NA	FALSE	NA	NA	FALSE	NA	NA	FALSE	FALSE	FALSE	FALSE	FALSE
HTP0276	T21	Male	39.7	TRUE	NA	FALSE	NA	FALSE	NA	FALSE	NA	NA	FALSE	FALSE	FALSE	FALSE	FALSE	FALSE	NA	FALSE	NA	NA	NA	FALSE	FALSE	NA	FALSE	NA	NA	NA	NA	NA	FALSE	FALSE	FALSE	FALSE	FALSE
HTP0277	T21	Female	35.2	FALSE	FALSE	FALSE	FALSE	FALSE	FALSE	TRUE	FALSE	FALSE	FALSE	FALSE	TRUE	FALSE	FALSE	FALSE	FALSE	FALSE	FALSE	FALSE	FALSE	FALSE	FALSE	FALSE	FALSE	TRUE	FALSE	NA	FALSE	FALSE	FALSE	FALSE	FALSE	FALSE	FALSE
HTP0278	T21	Male	7.6	FALSE	TRUE	FALSE	FALSE	FALSE	FALSE	FALSE	FALSE	FALSE	FALSE	FALSE	TRUE	FALSE	FALSE	FALSE	FALSE	FALSE	FALSE	FALSE	FALSE	FALSE	FALSE	FALSE	FALSE	FALSE	TRUE	TRUE	FALSE	FALSE	FALSE	FALSE	FALSE	FALSE	FALSE
HTP0281	T21	Female	16.2	FALSE	FALSE	FALSE	FALSE	FALSE	FALSE	TRUE	TRUE	FALSE	FALSE	FALSE	FALSE	FALSE	FALSE	FALSE	FALSE	FALSE	FALSE	FALSE	FALSE	FALSE	FALSE	FALSE	FALSE	FALSE	FALSE	NA	FALSE	FALSE	FALSE	FALSE	FALSE	FALSE	FALSE
HTP0282	T21	Female	10.5	FALSE	NA	FALSE	NA	FALSE	NA	FALSE	NA	NA	FALSE	FALSE	FALSE	FALSE	FALSE	FALSE	NA	FALSE	NA	NA	NA	FALSE	FALSE	NA	FALSE	NA	NA	NA	NA	NA	FALSE	FALSE	FALSE	FALSE	FALSE
HTP0283	T21	Male	7.2	FALSE	FALSE	TRUE	FALSE	FALSE	FALSE	FALSE	FALSE	FALSE	FALSE	FALSE	TRUE	FALSE	FALSE	FALSE	FALSE	FALSE	FALSE	FALSE	FALSE	FALSE	FALSE	FALSE	FALSE	FALSE	FALSE	NA	FALSE	FALSE	FALSE	FALSE	FALSE	FALSE	FALSE
HTP0284	T21	Female	2.6	FALSE	NA	FALSE	NA	FALSE	NA	FALSE	NA	NA	NA	NA	TRUE	NA	NA	NA	NA	FALSE	NA	NA	NA	FALSE	FALSE	NA	FALSE	NA	NA	NA	NA	NA	FALSE	FALSE	FALSE	FALSE	FALSE
HTP0291	T21	Male	23	FALSE	FALSE	FALSE	FALSE	FALSE	FALSE	FALSE	FALSE	FALSE	FALSE	FALSE	FALSE	FALSE	FALSE	FALSE	FALSE	FALSE	FALSE	FALSE	FALSE	FALSE	FALSE	FALSE	FALSE	TRUE	FALSE	FALSE	FALSE	FALSE	FALSE	FALSE	FALSE	FALSE	FALSE
HTP0293	T21	Male	6.2	FALSE	TRUE	FALSE	FALSE	FALSE	FALSE	FALSE	FALSE	FALSE	FALSE	FALSE	FALSE	TRUE	FALSE	FALSE	FALSE	FALSE	FALSE	FALSE	FALSE	FALSE	FALSE	FALSE	FALSE	TRUE	FALSE	FALSE	FALSE	FALSE	FALSE	FALSE	FALSE	FALSE	FALSE
HTP0295	T21	Male	51.2	FALSE	NA	FALSE	NA	FALSE	NA	FALSE	NA	NA	FALSE	FALSE	FALSE	FALSE	FALSE	FALSE	NA	FALSE	NA	NA	NA	FALSE	FALSE	NA	FALSE	NA	NA	NA	NA	NA	FALSE	FALSE	FALSE	FALSE	FALSE
HTP0296	T21	Male	55.1	FALSE	FALSE	FALSE	FALSE	FALSE	FALSE	FALSE	NA	FALSE	FALSE	FALSE	FALSE	FALSE	FALSE	FALSE	NA	FALSE	NA	NA	NA	FALSE	FALSE	NA	FALSE	NA	FALSE	NA	NA	NA	FALSE	FALSE	FALSE	FALSE	FALSE
HTP0297	T21	Female	22.5	TRUE	FALSE	FALSE	FALSE	FALSE	TRUE	FALSE	FALSE	FALSE	FALSE	FALSE	TRUE	FALSE	FALSE	FALSE	FALSE	FALSE	FALSE	FALSE	FALSE	FALSE	FALSE	FALSE	FALSE	FALSE	FALSE	TRUE	FALSE	FALSE	FALSE	FALSE	FALSE	FALSE	FALSE
HTP0298	T21	Female	25.8	FALSE	NA	FALSE	NA	FALSE	NA	FALSE	NA	NA	FALSE	FALSE	FALSE	FALSE	FALSE	FALSE	FALSE	FALSE	FALSE	FALSE	FALSE	FALSE	FALSE	NA	FALSE	NA	NA	NA	NA	NA	FALSE	FALSE	FALSE	FALSE	FALSE
HTP0300	T21	Female	30.8	FALSE	FALSE	FALSE	FALSE	FALSE	FALSE	TRUE	FALSE	FALSE	FALSE	FALSE	TRUE	FALSE	FALSE	FALSE	FALSE	FALSE	FALSE	FALSE	FALSE	FALSE	FALSE	FALSE	FALSE	FALSE	NA	NA	FALSE	FALSE	FALSE	FALSE	FALSE	FALSE	FALSE
HTP0301	T21	Female	22	FALSE	FALSE	FALSE	FALSE	FALSE	TRUE	FALSE	FALSE	FALSE	FALSE	FALSE	TRUE	FALSE	FALSE	FALSE	FALSE	FALSE	FALSE	FALSE	FALSE	FALSE	FALSE	FALSE	FALSE	FALSE	FALSE	NA	FALSE	FALSE	FALSE	FALSE	FALSE	FALSE	FALSE
HTP0303	T21	Female	30	TRUE	FALSE	FALSE	FALSE	FALSE	FALSE	TRUE	FALSE	FALSE	FALSE	FALSE	TRUE	FALSE	FALSE	FALSE	FALSE	FALSE	FALSE	FALSE	FALSE	FALSE	FALSE	FALSE	FALSE	FALSE	TRUE	NA	FALSE	FALSE	FALSE	FALSE	FALSE	FALSE	FALSE
HTP0306	T21	Male	23.2	FALSE	FALSE	TRUE	FALSE	FALSE	FALSE	FALSE	FALSE	FALSE	FALSE	FALSE	TRUE	FALSE	FALSE	FALSE	FALSE	FALSE	FALSE	FALSE	FALSE	FALSE	FALSE	FALSE	FALSE	FALSE	FALSE	NA	FALSE	FALSE	FALSE	FALSE	FALSE	FALSE	FALSE
HTP0310	T21	Male	10.8	FALSE	FALSE	FALSE	FALSE	FALSE	FALSE	FALSE	FALSE	FALSE	FALSE	FALSE	TRUE	FALSE	FALSE	FALSE	FALSE	FALSE	FALSE	FALSE	FALSE	FALSE	FALSE	FALSE	FALSE	FALSE	TRUE	NA	FALSE	FALSE	FALSE	FALSE	FALSE	FALSE	FALSE
HTP0312	T21	Female	33.7	FALSE	FALSE	FALSE	FALSE	FALSE	FALSE	FALSE	FALSE	FALSE	FALSE	FALSE	FALSE	FALSE	FALSE	FALSE	FALSE	FALSE	FALSE	FALSE	FALSE	FALSE	FALSE	FALSE	FALSE	FALSE	FALSE	NA	FALSE	FALSE	FALSE	FALSE	FALSE	FALSE	FALSE
HTP0313	T21	Male	21.5	FALSE	FALSE	FALSE	FALSE	FALSE	FALSE	TRUE	FALSE	FALSE	FALSE	FALSE	TRUE	FALSE	FALSE	FALSE	FALSE	FALSE	FALSE	FALSE	FALSE	FALSE	FALSE	FALSE	FALSE	FALSE	TRUE	NA	FALSE	FALSE	FALSE	FALSE	FALSE	FALSE	FALSE
HTP0315	T21	Female	28.3	FALSE	FALSE	FALSE	FALSE	FALSE	FALSE	FALSE	FALSE	FALSE	TRUE	FALSE	TRUE	FALSE	FALSE	TRUE	FALSE	FALSE	FALSE	FALSE	FALSE	FALSE	FALSE	FALSE	FALSE	FALSE	FALSE	NA	FALSE	FALSE	FALSE	FALSE	FALSE	FALSE	FALSE
HTP0318	T21	Male	29.6	FALSE	FALSE	FALSE	FALSE	FALSE	FALSE	FALSE	FALSE	FALSE	FALSE	FALSE	TRUE	FALSE	FALSE	FALSE	FALSE	FALSE	FALSE	FALSE	FALSE	FALSE	FALSE	FALSE	FALSE	FALSE	FALSE	FALSE	FALSE	FALSE	FALSE	FALSE	FALSE	FALSE	FALSE
HTP0319	T21	Female	19.5	FALSE	FALSE	FALSE	FALSE	FALSE	FALSE	FALSE	FALSE	FALSE	FALSE	FALSE	FALSE	FALSE	FALSE	FALSE	FALSE	FALSE	FALSE	FALSE	FALSE	FALSE	FALSE	FALSE	FALSE	FALSE	TRUE	TRUE	FALSE	FALSE	FALSE	FALSE	TRUE	FALSE	FALSE
HTP0320	T21	Female	32.6	FALSE	FALSE	FALSE	FALSE	FALSE	FALSE	FALSE	FALSE	FALSE	FALSE	FALSE	TRUE	FALSE	FALSE	FALSE	FALSE	FALSE	FALSE	FALSE	FALSE	FALSE	FALSE	NA	FALSE	TRUE	FALSE	NA	FALSE	FALSE	FALSE	FALSE	FALSE	FALSE	FALSE
HTP0321	T21	Female	14	FALSE	TRUE	FALSE	FALSE	FALSE	FALSE	FALSE	FALSE	FALSE	FALSE	FALSE	TRUE	FALSE	FALSE	FALSE	FALSE	FALSE	FALSE	FALSE	FALSE	FALSE	FALSE	FALSE	NA	FALSE	TRUE	NA	FALSE	FALSE	FALSE	FALSE	FALSE	FALSE	FALSE
HTP0323	T21	Male	3.8	FALSE	NA	FALSE	NA	FALSE	NA	FALSE	NA	FALSE	TRUE	FALSE	TRUE	FALSE	FALSE	TRUE	FALSE	FALSE	FALSE	FALSE	FALSE	FALSE	FALSE	FALSE	FALSE	FALSE	FALSE	NA	FALSE	FALSE	FALSE	FALSE	FALSE	FALSE	FALSE
HTP0324	T21	Male	20.9	FALSE	TRUE	FALSE	FALSE	FALSE	FALSE	FALSE	FALSE	FALSE	FALSE	FALSE	FALSE	FALSE	FALSE	FALSE	FALSE	FALSE	FALSE	FALSE	FALSE	FALSE	FALSE	FALSE	FALSE	TRUE	FALSE	NA	FALSE	FALSE	FALSE	FALSE	FALSE	FALSE	FALSE
HTP0325	T21	Male	13.4	FALSE	FALSE	FALSE	FALSE	FALSE	FALSE	FALSE	FALSE	FALSE	FALSE	FALSE	FALSE	FALSE	FALSE	FALSE	FALSE	FALSE	FALSE	FALSE	FALSE	FALSE	FALSE	FALSE	FALSE	FALSE	TRUE	NA	FALSE	FALSE	FALSE	FALSE	FALSE	FALSE	FALSE
HTP0326	T21	Female	30.2	FALSE	FALSE	FALSE	FALSE	FALSE	FALSE	FALSE	FALSE	FALSE	FALSE	FALSE	TRUE	FALSE	FALSE	FALSE	FALSE	FALSE	FALSE	FALSE	FALSE	FALSE	FALSE	FALSE	FALSE	NA	FALSE	NA	FALSE	FALSE	FALSE	FALSE	FALSE	FALSE	FALSE
HTP0327	T21	Male	6.5	FALSE	FALSE	FALSE	FALSE	FALSE	FALSE	FALSE	FALSE	FALSE	FALSE	FALSE	TRUE	FALSE	FALSE	FALSE	FALSE	FALSE	FALSE	FALSE	FALSE	FALSE	FALSE	FALSE	NA	TRUE	FALSE	NA	FALSE	FALSE	FALSE	FALSE	FALSE	FALSE	FALSE
HTP0328	T21	Female	41.2	FALSE	FALSE	FALSE	FALSE	FALSE	FALSE	FALSE	FALSE	FALSE	FALSE	FALSE	TRUE	FALSE	FALSE	FALSE	FALSE	FALSE	FALSE	FALSE	FALSE	FALSE	FALSE	FALSE	FALSE	FALSE	FALSE	TRUE	FALSE	FALSE	FALSE	FALSE	FALSE	FALSE	FALSE
HTP0329	T21	Female	18.5	FALSE	FALSE	FALSE	FALSE	FALSE	FALSE	FALSE	FALSE	FALSE	FALSE	FALSE	TRUE	FALSE	FALSE	FALSE	FALSE	FALSE	FALSE	FALSE	FALSE	FALSE	FALSE	FALSE	FALSE	FALSE	FALSE	TRUE	FALSE	FALSE	FALSE	FALSE	FALSE	FALSE	FALSE
HTP0330	T21	Male	6.1	FALSE	TRUE	FALSE	FALSE	FALSE	FALSE	FALSE	FALSE	FALSE	FALSE	FALSE	FALSE	FALSE	FALSE	FALSE	FALSE	FALSE	FALSE	FALSE	FALSE	FALSE	FALSE	FALSE	FALSE	FALSE	FALSE	NA	FALSE	FALSE	FALSE	FALSE	FALSE	FALSE	FALSE
HTP0331	T21	Male	23.1	FALSE	FALSE	FALSE	TRUE	FALSE	TRUE	TRUE	FALSE	FALSE	FALSE	FALSE	FALSE	FALSE	FALSE	FALSE	FALSE	FALSE	FALSE	FALSE	FALSE	FALSE	FALSE	FALSE	FALSE	FALSE	TRUE	FALSE	FALSE	FALSE	FALSE	FALSE	FALSE	FALSE	FALSE
HTP0332	T21	Male	24.4	FALSE	FALSE	TRUE	FALSE	FALSE	FALSE	FALSE	FALSE	FALSE	FALSE	FALSE	FALSE	FALSE	FALSE	FALSE	FALSE	FALSE	FALSE	FALSE	FALSE	FALSE	FALSE	FALSE	FALSE	FALSE	FALSE	NA	FALSE	FALSE	FALSE	FALSE	FALSE	FALSE	FALSE
HTP0333	T21	Female	29.5	FALSE	FALSE	FALSE	FALSE	FALSE	FALSE	FALSE	FALSE	FALSE	FALSE	FALSE	TRUE	FALSE	FALSE	FALSE	NA	FALSE	NA	NA	NA	FALSE	FALSE	FALSE	FALSE	FALSE	NA	FALSE	FALSE	FALSE	FALSE	FALSE	FALSE	FALSE	FALSE
HTP0334	T21	Male	43.1	FALSE	FALSE	FALSE	FALSE	FALSE	FALSE	FALSE	TRUE	FALSE	FALSE	FALSE	TRUE	FALSE	FALSE	FALSE	FALSE	TRUE	FALSE	FALSE	FALSE	FALSE	FALSE	FALSE	FALSE	TRUE	TRUE	NA	FALSE	FALSE	FALSE	FALSE	FALSE	FALSE	FALSE
HTP0335	T21	Female	56.6	FALSE	FALSE	FALSE	FALSE	FALSE	FALSE	FALSE	FALSE	FALSE	FALSE	FALSE	TRUE	FALSE	FALSE	FALSE	FALSE	FALSE	FALSE	FALSE	FALSE	FALSE	FALSE	FALSE	FALSE	FALSE	FALSE	NA	FALSE	FALSE	FALSE	FALSE	FALSE	FALSE	FALSE
HTP0336	T21	Female	8.7	FALSE	TRUE	FALSE	FALSE	FALSE	FALSE	FALSE	FALSE	FALSE	FALSE	FALSE	FALSE	FALSE	FALSE	FALSE	FALSE	FALSE	FALSE	FALSE	FALSE	FALSE	FALSE	FALSE	FALSE	FALSE	FALSE	NA	FALSE	FALSE	FALSE	FALSE	FALSE	FALSE	FALSE
HTP0337	T21	Male	22.2	FALSE	FALSE	FALSE	FALSE	FALSE	FALSE	FALSE	FALSE	FALSE	FALSE	FALSE	TRUE	FALSE	FALSE	FALSE	FALSE	FALSE	FALSE	FALSE	FALSE	FALSE	FALSE	FALSE	FALSE	FALSE	FALSE	NA	FALSE	FALSE	FALSE	FALSE	FALSE	FALSE	FALSE
HTP0339	T21	Male	16.1	TRUE	FALSE	FALSE	FALSE	TRUE	FALSE	TRUE	FALSE	TRUE	FALSE	TRUE	FALSE	FALSE	FALSE	FALSE	FALSE	FALSE	FALSE	FALSE	FALSE	FALSE	FALSE	FALSE	FALSE	FALSE	FALSE	NA	FALSE	FALSE	FALSE	FALSE	FALSE	FALSE	FALSE
HTP0340	T21	Female	18.6	FALSE	FALSE	FALSE	FALSE	FALSE	FALSE	TRUE	FALSE	FALSE	FALSE	FALSE	TRUE	FALSE	FALSE	FALSE	FALSE	FALSE	FALSE	FALSE	FALSE	FALSE	FALSE	FALSE	FALSE	FALSE	FALSE	NA	FALSE	FALSE	FALSE	FALSE	FALSE	FALSE	FALSE
HTP0341	T21	Male	2.6	FALSE	TRUE	FALSE	FALSE	FALSE	FALSE	FALSE	FALSE	FALSE	FALSE	FALSE	TRUE	FALSE	FALSE	FALSE	FALSE	FALSE	FALSE	FALSE	FALSE	FALSE	FALSE	FALSE	FALSE	FALSE	FALSE	FALSE	FALSE	FALSE	FALSE	FALSE	FALSE	FALSE	FALSE
HTP0342	T21	Female	13.6	FALSE	TRUE	FALSE	FALSE	FALSE	FALSE	FALSE	FALSE	FALSE	FALSE	FALSE	FALSE	FALSE	FALSE	FALSE	FALSE	FALSE	FALSE	FALSE	FALSE	FALSE	FALSE	FALSE	FALSE	TRUE	TRUE	TRUE	FALSE	FALSE	FALSE	FALSE	FALSE	FALSE	FALSE
HTP0344	T21	Male	38.8	FALSE	TRUE	FALSE	FALSE	FALSE	FALSE	TRUE	FALSE	FALSE	TRUE	FALSE	TRUE	FALSE	FALSE	FALSE	FALSE	FALSE	FALSE	FALSE	FALSE	FALSE	FALSE	FALSE	FALSE	FALSE	FALSE	NA	FALSE	FALSE	FALSE	FALSE	FALSE	FALSE	FALSE
HTP0345	T21	Female	52.7	FALSE	TRUE	FALSE	FALSE	FALSE	FALSE	FALSE	FALSE	FALSE	FALSE	FALSE	TRUE	FALSE	FALSE	FALSE	FALSE	FALSE	FALSE	FALSE	FALSE	FALSE	FALSE	FALSE	FALSE	FALSE	FALSE	NA	FALSE	FALSE	FALSE	FALSE	FALSE	FALSE	FALSE
HTP0348	T21	Female	17.2	FALSE	FALSE	FALSE	FALSE	FALSE	FALSE	TRUE	FALSE	FALSE	FALSE	FALSE	TRUE	FALSE	FALSE	FALSE	FALSE	FALSE	FALSE	FALSE	FALSE	FALSE	FALSE	FALSE	FALSE	FALSE	TRUE	NA	FALSE	FALSE	FALSE	FALSE	FALSE	FALSE	FALSE
HTP0350	T21	Male	21.6	FALSE	TRUE	FALSE	FALSE	FALSE	FALSE	FALSE	FALSE	FALSE	FALSE	FALSE	FALSE	FALSE	FALSE	FALSE	FALSE	FALSE	FALSE	FALSE	FALSE	FALSE	FALSE	FALSE	FALSE	FALSE	FALSE	NA	FALSE	FALSE	FALSE	FALSE	FALSE	FALSE	FALSE
HTP0351	T21	Male	27	FALSE	TRUE	FALSE	FALSE	FALSE	FALSE	FALSE	FALSE	FALSE	FALSE	FALSE	FALSE	FALSE	FALSE	FALSE	FALSE	FALSE	FALSE	FALSE	FALSE	FALSE	FALSE	FALSE	FALSE	FALSE	FALSE	NA	FALSE	FALSE	FALSE	FALSE	FALSE	FALSE	FALSE
HTP0354	T21	Male	6	FALSE	TRUE	FALSE	FALSE	FALSE	FALSE	FALSE	FALSE	FALSE	FALSE	FALSE	FALSE	FALSE	FALSE	FALSE	FALSE	FALSE	FALSE	FALSE	FALSE	FALSE	FALSE	FALSE	FALSE	FALSE	FALSE	NA	FALSE	FALSE	FALSE	FALSE	FALSE	FALSE	FALSE
HTP0357	T21	Male	3.8	FALSE	TRUE	FALSE	FALSE	FALSE	FALSE	FALSE	FALSE	FALSE	FALSE	FALSE	FALSE	FALSE	FALSE	FALSE	FALSE	TRUE	FALSE	FALSE	FALSE	FALSE	FALSE	FALSE	FALSE	FALSE	FALSE	NA	FALSE	FALSE	FALSE	FALSE	FALSE	FALSE	FALSE
HTP0360	T21	Male	4.2	FALSE	FALSE	FALSE	FALSE	FALSE	FALSE	FALSE	FALSE	FALSE	FALSE	FALSE	FALSE	FALSE	FALSE	FALSE	FALSE	FALSE	FALSE	FALSE	FALSE	FALSE	FALSE	FALSE	FALSE	FALSE	TRUE	TRUE	FALSE	FALSE	FALSE	FALSE	FALSE	FALSE	FALSE
HTP0362	T21	Female	15.3	FALSE	TRUE	FALSE	FALSE	FALSE	FALSE	FALSE	FALSE	TRUE	FALSE	TRUE	FALSE	FALSE	FALSE	FALSE	FALSE	FALSE	FALSE	FALSE	FALSE	FALSE	FALSE	FALSE	FALSE	FALSE	FALSE	NA	FALSE	FALSE	FALSE	FALSE	FALSE	FALSE	FALSE
HTP0363	T21	Male	5.7	FALSE	FALSE	FALSE	FALSE	FALSE	FALSE	FALSE	FALSE	FALSE	FALSE	FALSE	FALSE	FALSE	FALSE	FALSE	FALSE	FALSE	FALSE	FALSE	FALSE	FALSE	FALSE	FALSE	NA	TRUE	TRUE	NA	FALSE	FALSE	FALSE	FALSE	FALSE	FALSE	FALSE
HTP0364	T21	Male	13.7	FALSE	TRUE	TRUE	FALSE	FALSE	FALSE	FALSE	FALSE	FALSE	FALSE	FALSE	FALSE	FALSE	FALSE	FALSE	FALSE	FALSE	FALSE	FALSE	FALSE	FALSE	FALSE	FALSE	FALSE	FALSE	FALSE	NA	FALSE	FALSE	FALSE	FALSE	FALSE	FALSE	FALSE
HTP0365	T21	Female	12.6	FALSE	TRUE	TRUE	FALSE	TRUE	FALSE	FALSE	FALSE	FALSE	FALSE	FALSE	FALSE	FALSE	FALSE	FALSE	FALSE	FALSE	FALSE	FALSE	FALSE	FALSE	FALSE	FALSE	FALSE	TRUE	TRUE	TRUE	FALSE	FALSE	FALSE	FALSE	FALSE	FALSE	FALSE
HTP0366	T21	Female	3	FALSE	FALSE	FALSE	FALSE	FALSE	FALSE	FALSE	FALSE	FALSE	FALSE	FALSE	FALSE	FALSE	FALSE	FALSE	FALSE	FALSE	FALSE	FALSE	FALSE	FALSE	FALSE	FALSE	FALSE	TRUE	FALSE	NA	FALSE	FALSE	FALSE	FALSE	FALSE	FALSE	FALSE
HTP0367	T21	Male	13.6	FALSE	TRUE	FALSE	FALSE	FALSE	TRUE	TRUE	FALSE	FALSE	FALSE	FALSE	FALSE	FALSE	FALSE	FALSE	FALSE	FALSE	FALSE	FALSE	FALSE	FALSE	FALSE	FALSE	FALSE	FALSE	FALSE	NA	FALSE	FALSE	FALSE	FALSE	FALSE	FALSE	FALSE
HTP0368	T21	Male	15.2	FALSE	TRUE	TRUE	FALSE	FALSE	FALSE	FALSE	FALSE	FALSE	FALSE	FALSE	TRUE	FALSE	FALSE	FALSE	FALSE	TRUE	FALSE	FALSE	FALSE	FALSE	FALSE	FALSE	FALSE	FALSE	FALSE	TRUE	TRUE	FALSE	FALSE	FALSE	FALSE	FALSE	FALSE
HTP0369	T21	Female	13.1	FALSE	TRUE	FALSE	FALSE	FALSE	FALSE	FALSE	FALSE	FALSE	FALSE	FALSE	TRUE	FALSE	FALSE	FALSE	FALSE	FALSE	FALSE	FALSE	FALSE	FALSE	FALSE	FALSE	FALSE	FALSE	FALSE	NA	FALSE	FALSE	FALSE	FALSE	FALSE	FALSE	FALSE
HTP0370	T21	Male	20.2	FALSE	FALSE	FALSE	FALSE	FALSE	FALSE	FALSE	FALSE	FALSE	FALSE	FALSE	TRUE	FALSE	FALSE	FALSE	FALSE	FALSE	FALSE	FALSE	FALSE	FALSE	FALSE	FALSE	FALSE	FALSE	FALSE	NA	FALSE	FALSE	FALSE	FALSE	FALSE	FALSE	FALSE
HTP0373	T21	Male	56.7	FALSE	FALSE	FALSE	FALSE	FALSE	FALSE	FALSE	FALSE	FALSE	FALSE	FALSE	TRUE	FALSE	FALSE	FALSE	FALSE	FALSE	FALSE	FALSE	FALSE	FALSE	FALSE	FALSE	FALSE	FALSE	FALSE	TRUE	FALSE	FALSE	FALSE	FALSE	FALSE	FALSE	FALSE
HTP0374	T21	Male	25.5	FALSE	NA	FALSE	NA	FALSE	NA	FALSE	NA	NA	FALSE	FALSE	FALSE	FALSE	FALSE	FALSE	NA	FALSE	NA	NA	NA	FALSE	FALSE	NA	FALSE	NA	NA	NA	FALSE	FALSE	FALSE	FALSE	FALSE	FALSE	FALSE
HTP0375	T21	Female	10.9	FALSE	NA	FALSE	NA	FALSE	NA	FALSE	NA	FALSE	FALSE	FALSE	TRUE	FALSE	FALSE	FALSE	NA	FALSE	NA	NA	NA	FALSE	FALSE	NA	FALSE	NA	NA	NA	NA	NA	FALSE	FALSE	FALSE	FALSE	FALSE
HTP0378	T21	Female	31.4	FALSE	FALSE	FALSE	FALSE	FALSE	FALSE	FALSE	FALSE	FALSE	FALSE	FALSE	TRUE	FALSE	FALSE	FALSE	FALSE	FALSE	FALSE	FALSE	FALSE	FALSE	FALSE	FALSE	FALSE	FALSE	TRUE	TRUE	FALSE	FALSE	FALSE	FALSE	FALSE	FALSE	FALSE
HTP0379	T21	Female	35.4	TRUE	FALSE	FALSE	FALSE	FALSE	TRUE	FALSE	FALSE	NA	FALSE	FALSE	FALSE	FALSE	FALSE	FALSE	FALSE	FALSE	FALSE	FALSE	FALSE	FALSE	FALSE	FALSE	FALSE	FALSE	NA	NA	NA	NA	FALSE	FALSE	FALSE	FALSE	FALSE
HTP0380	T21	Male	25.8	FALSE	TRUE	FALSE	FALSE	FALSE	TRUE	FALSE	FALSE	FALSE	FALSE	FALSE	FALSE	FALSE	FALSE	FALSE	FALSE	FALSE	FALSE	FALSE	FALSE	FALSE	FALSE	FALSE	FALSE	TRUE	FALSE	NA	FALSE	FALSE	FALSE	FALSE	FALSE	FALSE	FALSE
HTP0381	T21	Male	25.4	FALSE	FALSE	FALSE	FALSE	FALSE	FALSE	FALSE	FALSE	FALSE	FALSE	TRUE	TRUE	FALSE	FALSE	FALSE	FALSE	FALSE	FALSE	FALSE	FALSE	FALSE	FALSE	FALSE	FALSE	TRUE	FALSE	TRUE	FALSE	FALSE	FALSE	FALSE	FALSE	FALSE	FALSE
HTP0382	T21	Male	39.5	FALSE	FALSE	FALSE	FALSE	FALSE	FALSE	FALSE	FALSE	FALSE	FALSE	FALSE	FALSE	FALSE	FALSE	FALSE	FALSE	FALSE	FALSE	FALSE	FALSE	FALSE	FALSE	FALSE	FALSE	FALSE	FALSE	NA	FALSE	FALSE	FALSE	FALSE	FALSE	FALSE	FALSE
HTP0383	T21	Female	18.5	FALSE	FALSE	FALSE	FALSE	FALSE	TRUE	FALSE	FALSE	FALSE	FALSE	FALSE	TRUE	FALSE	FALSE	TRUE	FALSE	FALSE	FALSE	FALSE	FALSE	FALSE	FALSE	FALSE	FALSE	TRUE	TRUE	NA	FALSE	FALSE	FALSE	FALSE	FALSE	FALSE	FALSE
HTP0384	T21	Female	27.8	FALSE	FALSE	FALSE	FALSE	FALSE	TRUE	FALSE	TRUE	FALSE	FALSE	FALSE	TRUE	FALSE	FALSE	FALSE	FALSE	FALSE	FALSE	FALSE	FALSE	FALSE	FALSE	NA	NA	NA	NA	NA	FALSE	FALSE	FALSE	FALSE	FALSE	FALSE	FALSE
HTP0385	T21	Male	25.6	FALSE	NA	FALSE	NA	FALSE	NA	TRUE	NA	FALSE	FALSE	FALSE	TRUE	FALSE	FALSE	FALSE	NA	TRUE	NA	NA	NA	FALSE	FALSE	NA	FALSE	FALSE	NA	TRUE	NA	NA	FALSE	FALSE	FALSE	FALSE	FALSE
HTP0386	T21	Male	6.8	FALSE	NA	FALSE	NA	FALSE	NA	FALSE	NA	NA	FALSE	FALSE	FALSE	FALSE	FALSE	FALSE	NA	FALSE	NA	NA	NA	FALSE	FALSE	NA	FALSE	NA	NA	NA	FALSE	FALSE	FALSE	FALSE	FALSE	FALSE	FALSE
HTP0387	T21	Female	33.3	FALSE	FALSE	FALSE	FALSE	FALSE	TRUE	FALSE	FALSE	FALSE	FALSE	FALSE	TRUE	FALSE	FALSE	FALSE	FALSE	FALSE	FALSE	FALSE	FALSE	FALSE	FALSE	FALSE	FALSE	TRUE	FALSE	NA	FALSE	FALSE	FALSE	FALSE	FALSE	FALSE	FALSE
HTP0388	T21	Female	37.5	FALSE	FALSE	FALSE	TRUE	FALSE	TRUE	TRUE	FALSE	FALSE	FALSE	FALSE	TRUE	FALSE	FALSE	FALSE	FALSE	FALSE	FALSE	FALSE	FALSE	FALSE	FALSE	FALSE	FALSE	FALSE	TRUE	TRUE	FALSE	FALSE	FALSE	FALSE	FALSE	FALSE	FALSE
HTP0389	T21	Female	20.1	FALSE	FALSE	FALSE	FALSE	FALSE	TRUE	TRUE	NA	FALSE	FALSE	FALSE	TRUE	TRUE	FALSE	FALSE	NA	FALSE	NA	NA	NA	FALSE	FALSE	NA	FALSE	NA	FALSE	TRUE	NA	NA	FALSE	FALSE	FALSE	FALSE	FALSE
HTP0390	T21	Female	15.5	NA	FALSE	NA	FALSE	NA	FALSE	TRUE	FALSE	FALSE	FALSE	FALSE	FALSE	FALSE	FALSE	FALSE	NA	NA	NA	NA	NA	NA	FALSE	FALSE	NA	FALSE	NA	NA	FALSE	FALSE	FALSE	FALSE	FALSE	FALSE	FALSE
HTP0391	T21	Male	26.8	FALSE	FALSE	FALSE	FALSE	FALSE	FALSE	TRUE	FALSE	FALSE	FALSE	FALSE	FALSE	FALSE	FALSE	FALSE	FALSE	FALSE	FALSE	FALSE	FALSE	FALSE	FALSE	FALSE	FALSE	FALSE	FALSE	TRUE	FALSE	FALSE	FALSE	FALSE	FALSE	FALSE	FALSE
HTP0392	T21	Male	32.4	FALSE	FALSE	FALSE	FALSE	FALSE	TRUE	FALSE	FALSE	FALSE	FALSE	FALSE	TRUE	FALSE	FALSE	FALSE	FALSE	FALSE	FALSE	FALSE	FALSE	FALSE	FALSE	FALSE	FALSE	FALSE	FALSE	NA	FALSE	FALSE	FALSE	FALSE	FALSE	FALSE	FALSE
HTP0393	T21	Female	39.8	FALSE	NA	FALSE	NA	FALSE	NA	FALSE	NA	NA	FALSE	NA	NA	NA	NA	FALSE	NA	FALSE	NA	NA	NA	FALSE	FALSE	NA	FALSE	FALSE	NA	NA	NA	NA	FALSE	FALSE	FALSE	FALSE	FALSE
HTP0394	T21	Female	23.6	FALSE	FALSE	TRUE	FALSE	FALSE	FALSE	FALSE	FALSE	FALSE	TRUE	TRUE	TRUE	FALSE	FALSE	FALSE	FALSE	FALSE	FALSE	FALSE	FALSE	FALSE	TRUE	FALSE	FALSE	FALSE	FALSE	NA	FALSE	FALSE	FALSE	FALSE	FALSE	FALSE	FALSE
HTP0395	T21	Male	35.2	FALSE	FALSE	TRUE	FALSE	FALSE	FALSE	FALSE	FALSE	FALSE	FALSE	FALSE	FALSE	FALSE	FALSE	FALSE	FALSE	FALSE	FALSE	FALSE	FALSE	FALSE	FALSE	FALSE	FALSE	FALSE	FALSE	NA	FALSE	FALSE	FALSE	FALSE	FALSE	FALSE	FALSE
HTP0396	T21	Male	15.9	FALSE	NA	FALSE	NA	FALSE	NA	FALSE	NA	NA	FALSE	FALSE	FALSE	FALSE	FALSE	FALSE	NA	FALSE	NA	NA	NA	FALSE	FALSE	NA	FALSE	NA	NA	TRUE	NA	NA	FALSE	FALSE	FALSE	FALSE	FALSE
HTP0397	T21	Male	38.7	FALSE	FALSE	FALSE	FALSE	FALSE	FALSE	FALSE	FALSE	FALSE	FALSE	FALSE	FALSE	FALSE	FALSE	FALSE	FALSE	FALSE	FALSE	FALSE	FALSE	FALSE	FALSE	FALSE	FALSE	FALSE	FALSE	NA	FALSE	FALSE	FALSE	FALSE	FALSE	FALSE	FALSE
HTP0398	T21	Female	17.5	FALSE	NA	FALSE	NA	NA	NA	TRUE	NA	FALSE	FALSE	FALSE	TRUE	FALSE	FALSE	FALSE	NA	TRUE	NA	NA	NA	FALSE	FALSE	NA	FALSE	NA	NA	NA	NA	NA	FALSE	FALSE	FALSE	FALSE	FALSE
HTP0399	T21	Male	32.1	FALSE	TRUE	TRUE	FALSE	FALSE	FALSE	FALSE	FALSE	FALSE	FALSE	FALSE	TRUE	FALSE	FALSE	FALSE	FALSE	FALSE	FALSE	FALSE	FALSE	FALSE	FALSE	FALSE	FALSE	FALSE	FALSE	NA	FALSE	FALSE	FALSE	FALSE	FALSE	FALSE	FALSE
HTP0400	T21	Male	14.9	TRUE	NA	TRUE	NA	FALSE	NA	FALSE	NA	NA	FALSE	FALSE	FALSE	FALSE	FALSE	FALSE	NA	FALSE	NA	NA	NA	FALSE	FALSE	NA	FALSE	NA	NA	NA	FALSE	FALSE	FALSE	FALSE	FALSE	FALSE	FALSE
HTP0401	T21	Female	34.6	FALSE	TRUE	FALSE	NA	FALSE	NA	FALSE	NA	FALSE	FALSE	TRUE	TRUE	FALSE	FALSE	FALSE	FALSE	FALSE	FALSE	FALSE	FALSE	FALSE	TRUE	NA	FALSE	FALSE	NA	NA	NA	NA	FALSE	FALSE	FALSE	FALSE	FALSE
HTP0402	T21	Male	35.9	FALSE	NA	FALSE	NA	FALSE	NA	FALSE	NA	NA	FALSE	FALSE	FALSE	FALSE	FALSE	FALSE	NA	FALSE	NA	NA	NA	FALSE	FALSE	NA	FALSE	NA	NA	TRUE	NA	NA	FALSE	FALSE	FALSE	FALSE	FALSE
HTP0403	T21	Male	13.4	FALSE	TRUE	FALSE	FALSE	FALSE	FALSE	FALSE	FALSE	FALSE	TRUE	FALSE	TRUE	FALSE	FALSE	TRUE	FALSE	FALSE	FALSE	FALSE	FALSE	FALSE	FALSE	FALSE	FALSE	FALSE	NA	NA	FALSE	FALSE	FALSE	FALSE	FALSE	FALSE	FALSE
HTP0404	T21	Female	12.5	FALSE	NA	FALSE	NA	FALSE	NA	FALSE	NA	FALSE	FALSE	FALSE	TRUE	TRUE	FALSE	FALSE	NA	FALSE	NA	NA	NA	FALSE	FALSE	NA	FALSE	NA	NA	TRUE	NA	NA	FALSE	FALSE	FALSE	FALSE	FALSE
HTP0405	T21	Male	26.1	FALSE	FALSE	FALSE	FALSE	FALSE	FALSE	FALSE	FALSE	FALSE	TRUE	FALSE	TRUE	FALSE	TRUE	TRUE	FALSE	FALSE	FALSE	FALSE	FALSE	FALSE	FALSE	FALSE	FALSE	FALSE	FALSE	NA	FALSE	FALSE	FALSE	FALSE	FALSE	FALSE	FALSE
HTP0406	T21	Female	9.2	FALSE	NA	FALSE	NA	FALSE	NA	FALSE	NA	TRUE	FALSE	TRUE	TRUE	FALSE	FALSE	TRUE	NA	FALSE	NA	NA	NA	FALSE	FALSE	NA	FALSE	TRUE	NA	TRUE	NA	NA	FALSE	FALSE	FALSE	FALSE	FALSE
HTP0407	T21	Male	43.5	FALSE	FALSE	FALSE	FALSE	FALSE	FALSE	FALSE	FALSE	FALSE	FALSE	FALSE	TRUE	FALSE	FALSE	FALSE	FALSE	FALSE	FALSE	FALSE	FALSE	FALSE	FALSE	FALSE	FALSE	FALSE	FALSE	TRUE	FALSE	FALSE	FALSE	FALSE	FALSE	FALSE	FALSE
HTP0408	T21	Male	40.6	FALSE	TRUE	FALSE	NA	FALSE	NA	FALSE	NA	NA	FALSE	FALSE	FALSE	FALSE	FALSE	FALSE	NA	FALSE	NA	NA	NA	FALSE	FALSE	NA	FALSE	NA	NA	TRUE	NA	NA	FALSE	FALSE	FALSE	FALSE	FALSE
HTP0409	T21	Female	21.2	FALSE	NA	FALSE	NA	FALSE	NA	FALSE	NA	NA	FALSE	FALSE	FALSE	FALSE	FALSE	FALSE	NA	FALSE	NA	NA	NA	FALSE	FALSE	NA	FALSE	NA	NA	TRUE	NA	NA	FALSE	FALSE	FALSE	FALSE	FALSE
HTP0410	T21	Male	24	FALSE	FALSE	FALSE	FALSE	FALSE	FALSE	FALSE	FALSE	FALSE	FALSE	FALSE	FALSE	FALSE	FALSE	FALSE	FALSE	FALSE	FALSE	FALSE	FALSE	FALSE	FALSE	FALSE	FALSE	FALSE	FALSE	TRUE	FALSE	FALSE	FALSE	FALSE	FALSE	FALSE	FALSE
HTP0411	T21	Female	18.7	TRUE	NA	FALSE	NA	FALSE	NA	FALSE	NA	FALSE	FALSE	FALSE	TRUE	FALSE	FALSE	FALSE	NA	FALSE	NA	NA	NA	FALSE	FALSE	NA	FALSE	NA	NA	NA	NA	NA	FALSE	FALSE	FALSE	FALSE	FALSE
HTP0412	T21	Male	20.7	FALSE	TRUE	TRUE	FALSE	TRUE	FALSE	TRUE	FALSE	FALSE	FALSE	FALSE	TRUE	FALSE	FALSE	FALSE	FALSE	FALSE	FALSE	FALSE	FALSE	FALSE	FALSE	FALSE	FALSE	FALSE	FALSE	NA	FALSE	FALSE	FALSE	FALSE	FALSE	FALSE	FALSE
HTP0413	T21	Female	22.5	FALSE	NA	FALSE	NA	FALSE	TRUE	FALSE	NA	FALSE	FALSE	FALSE	TRUE	FALSE	FALSE	FALSE	NA	NA	NA	NA	NA	FALSE	FALSE	NA	FALSE	NA	NA	NA	NA	NA	FALSE	FALSE	FALSE	FALSE	FALSE
HTP0414	T21	Female	21.8	FALSE	FALSE	FALSE	TRUE	FALSE	TRUE	FALSE	FALSE	FALSE	FALSE	FALSE	TRUE	FALSE	FALSE	FALSE	FALSE	TRUE	FALSE	FALSE	FALSE	FALSE	FALSE	FALSE	FALSE	TRUE	FALSE	NA	FALSE	FALSE	FALSE	FALSE	FALSE	FALSE	FALSE
HTP0415	T21	Female	8.3	FALSE	NA	FALSE	NA	FALSE	NA	NA	NA	FALSE	FALSE	FALSE	TRUE	FALSE	FALSE	FALSE	FALSE	FALSE	FALSE	FALSE	FALSE	FALSE	FALSE	FALSE	FALSE	TRUE	FALSE	NA	FALSE	FALSE	FALSE	FALSE	FALSE	FALSE	FALSE
HTP0416	T21	Male	26.9	FALSE	FALSE	FALSE	FALSE	FALSE	FALSE	FALSE	FALSE	FALSE	FALSE	FALSE	TRUE	FALSE	FALSE	FALSE	FALSE	FALSE	FALSE	FALSE	FALSE	FALSE	FALSE	FALSE	FALSE	FALSE	FALSE	NA	FALSE	FALSE	FALSE	FALSE	FALSE	FALSE	FALSE
HTP0418	T21	Male	3.8	FALSE	TRUE	FALSE	NA	FALSE	NA	FALSE	NA	NA	FALSE	FALSE	FALSE	FALSE	FALSE	FALSE	NA	FALSE	NA	NA	NA	FALSE	FALSE	NA	FALSE	FALSE	NA	NA	FALSE	FALSE	FALSE	FALSE	FALSE	FALSE	FALSE
HTP0419	T21	Male	20.8	FALSE	FALSE	FALSE	FALSE	FALSE	FALSE	FALSE	FALSE	FALSE	TRUE	FALSE	TRUE	FALSE	FALSE	FALSE	FALSE	FALSE	FALSE	FALSE	FALSE	FALSE	FALSE	FALSE	FALSE	TRUE	FALSE	NA	FALSE	FALSE	FALSE	FALSE	FALSE	FALSE	FALSE
HTP0420	T21	Male	6.4	FALSE	TRUE	FALSE	NA	FALSE	NA	FALSE	NA	NA	FALSE	FALSE	FALSE	FALSE	FALSE	FALSE	NA	FALSE	NA	NA	NA	FALSE	FALSE	NA	FALSE	NA	NA	FALSE	NA	NA	FALSE	FALSE	FALSE	FALSE	FALSE
HTP0421	T21	Male	13.7	TRUE	NA	FALSE	NA	FALSE	NA	FALSE	NA	NA	NA	FALSE	TRUE	FALSE	NA	NA	NA	TRUE	NA	NA	NA	FALSE	FALSE	NA	FALSE	NA	NA	NA	FALSE	FALSE	FALSE	FALSE	FALSE	FALSE	FALSE
HTP0422	T21	Female	11.3	FALSE	FALSE	FALSE	FALSE	FALSE	FALSE	FALSE	FALSE	FALSE	FALSE	FALSE	FALSE	FALSE	FALSE	FALSE	FALSE	FALSE	FALSE	FALSE	FALSE	FALSE	FALSE	FALSE	FALSE	FALSE	FALSE	NA	FALSE	FALSE	FALSE	FALSE	FALSE	FALSE	FALSE
HTP0423	T21	Male	23.9	FALSE	FALSE	FALSE	FALSE	FALSE	FALSE	FALSE	FALSE	FALSE	TRUE	TRUE	TRUE	FALSE	FALSE	TRUE	FALSE	FALSE	FALSE	FALSE	FALSE	FALSE	FALSE	FALSE	FALSE	FALSE	FALSE	NA	FALSE	FALSE	FALSE	FALSE	FALSE	FALSE	FALSE
HTP0424	T21	Female	4	FALSE	NA	FALSE	NA	FALSE	NA	NA	NA	NA	NA	NA	NA	NA	NA	NA	FALSE	FALSE	FALSE	FALSE	FALSE	FALSE	FALSE	NA	NA	FALSE	NA	NA	FALSE	FALSE	FALSE	FALSE	FALSE	FALSE	FALSE
HTP0425	T21	Male	19.1	TRUE	FALSE	FALSE	FALSE	FALSE	FALSE	FALSE	FALSE	FALSE	FALSE	FALSE	TRUE	FALSE	FALSE	FALSE	FALSE	FALSE	FALSE	FALSE	FALSE	FALSE	FALSE	FALSE	FALSE	TRUE	FALSE	NA	FALSE	FALSE	FALSE	FALSE	TRUE	FALSE	FALSE
HTP0426	T21	Male	17.5	FALSE	NA	FALSE	NA	FALSE	NA	FALSE	NA	FALSE	FALSE	FALSE	TRUE	FALSE	FALSE	FALSE	NA	FALSE	NA	NA	NA	FALSE	FALSE	NA	FALSE	FALSE	NA	NA	NA	NA	FALSE	FALSE	FALSE	FALSE	FALSE
HTP0427	T21	Male	6	FALSE	FALSE	FALSE	FALSE	FALSE	FALSE	FALSE	FALSE	FALSE	FALSE	FALSE	TRUE	FALSE	FALSE	FALSE	FALSE	TRUE	FALSE	FALSE	FALSE	FALSE	FALSE	FALSE	FALSE	FALSE	FALSE	NA	FALSE	FALSE	FALSE	FALSE	FALSE	FALSE	FALSE
HTP0428	T21	Male	27.5	FALSE	TRUE	FALSE	FALSE	FALSE	FALSE	TRUE	FALSE	FALSE	FALSE	FALSE	FALSE	FALSE	FALSE	FALSE	NA	FALSE	NA	NA	NA	FALSE	FALSE	FALSE	FALSE	TRUE	FALSE	NA	FALSE	FALSE	FALSE	FALSE	FALSE	FALSE	FALSE
HTP0430	T21	Male	13.9	FALSE	TRUE	FALSE	FALSE	FALSE	FALSE	TRUE	FALSE	FALSE	TRUE	FALSE	TRUE	FALSE	FALSE	FALSE	FALSE	FALSE	FALSE	FALSE	FALSE	FALSE	FALSE	FALSE	FALSE	FALSE	FALSE	TRUE	FALSE	FALSE	FALSE	FALSE	FALSE	FALSE	FALSE
HTP0431	T21	Female	19.9	TRUE	FALSE	FALSE	TRUE	FALSE	TRUE	TRUE	TRUE	FALSE	FALSE	FALSE	FALSE	FALSE	FALSE	FALSE	FALSE	FALSE	FALSE	FALSE	FALSE	FALSE	FALSE	FALSE	FALSE	FALSE	FALSE	NA	FALSE	FALSE	FALSE	FALSE	FALSE	FALSE	FALSE
HTP0432	T21	Male	13.9	FALSE	FALSE	TRUE	FALSE	FALSE	FALSE	TRUE	FALSE	FALSE	TRUE	FALSE	TRUE	FALSE	FALSE	FALSE	FALSE	FALSE	FALSE	FALSE	FALSE	FALSE	FALSE	FALSE	FALSE	TRUE	FALSE	TRUE	FALSE	FALSE	FALSE	FALSE	FALSE	FALSE	FALSE
HTP0433	T21	Female	33.4	FALSE	TRUE	FALSE	FALSE	FALSE	FALSE	TRUE	FALSE	FALSE	FALSE	FALSE	TRUE	FALSE	FALSE	FALSE	FALSE	FALSE	FALSE	FALSE	FALSE	FALSE	FALSE	FALSE	FALSE	FALSE	FALSE	NA	FALSE	FALSE	FALSE	FALSE	FALSE	FALSE	FALSE
HTP0434	T21	Female	25.9	FALSE	NA	FALSE	NA	FALSE	NA	FALSE	NA	FALSE	FALSE	FALSE	TRUE	TRUE	FALSE	FALSE	NA	FALSE	NA	NA	NA	FALSE	FALSE	NA	FALSE	NA	NA	TRUE	NA	NA	FALSE	FALSE	FALSE	FALSE	FALSE
HTP0435	T21	Male	35.2	FALSE	NA	FALSE	NA	FALSE	NA	FALSE	NA	FALSE	FALSE	FALSE	TRUE	FALSE	FALSE	FALSE	NA	FALSE	NA	NA	NA	FALSE	FALSE	NA	FALSE	NA	NA	FALSE	NA	NA	FALSE	FALSE	FALSE	FALSE	FALSE
HTP0436	T21	Female	32.8	NA	NA	NA	NA	NA	NA	NA	NA	FALSE	FALSE	FALSE	TRUE	FALSE	FALSE	FALSE	NA	NA	NA	NA	NA	NA	FALSE	NA	NA	NA	NA	NA	NA	NA	NA	NA	NA	NA	NA
HTP0437	T21	Male	24.9	FALSE	FALSE	FALSE	FALSE	FALSE	FALSE	FALSE	FALSE	FALSE	FALSE	FALSE	FALSE	FALSE	FALSE	FALSE	FALSE	FALSE	FALSE	FALSE	FALSE	FALSE	FALSE	FALSE	FALSE	FALSE	FALSE	NA	FALSE	FALSE	FALSE	FALSE	FALSE	FALSE	FALSE
HTP0438	T21	Female	19.9	FALSE	TRUE	FALSE	FALSE	FALSE	FALSE	FALSE	FALSE	FALSE	FALSE	FALSE	FALSE	FALSE	FALSE	FALSE	FALSE	FALSE	FALSE	FALSE	FALSE	FALSE	FALSE	FALSE	FALSE	TRUE	FALSE	TRUE	FALSE	FALSE	FALSE	FALSE	TRUE	FALSE	FALSE
HTP0439	T21	Male	40	TRUE	NA	FALSE	NA	TRUE	NA	TRUE	NA	NA	FALSE	FALSE	FALSE	FALSE	FALSE	FALSE	NA	FALSE	NA	NA	NA	FALSE	FALSE	NA	FALSE	NA	NA	NA	NA	NA	FALSE	FALSE	FALSE	FALSE	FALSE
HTP0440	T21	Male	20.9	FALSE	TRUE	FALSE	FALSE	FALSE	FALSE	FALSE	TRUE	FALSE	FALSE	FALSE	TRUE	FALSE	FALSE	FALSE	FALSE	FALSE	FALSE	FALSE	FALSE	FALSE	FALSE	FALSE	FALSE	TRUE	TRUE	TRUE	FALSE	FALSE	FALSE	FALSE	FALSE	FALSE	FALSE
HTP0441	T21	Male	9.8	FALSE	NA	FALSE	NA	FALSE	NA	FALSE	NA	NA	FALSE	FALSE	FALSE	FALSE	FALSE	FALSE	NA	FALSE	NA	NA	NA	FALSE	FALSE	NA	FALSE	NA	NA	FALSE	NA	NA	FALSE	FALSE	FALSE	FALSE	FALSE
HTP0442	T21	Female	8.5	FALSE	NA	FALSE	NA	FALSE	NA	FALSE	NA	NA	FALSE	FALSE	FALSE	FALSE	FALSE	FALSE	NA	FALSE	NA	NA	NA	FALSE	FALSE	NA	FALSE	NA	NA	NA	NA	NA	FALSE	FALSE	FALSE	FALSE	FALSE
HTP0443	T21	Male	17	FALSE	NA	FALSE	NA	FALSE	NA	FALSE	NA	FALSE	FALSE	FALSE	TRUE	FALSE	FALSE	FALSE	NA	FALSE	NA	NA	NA	FALSE	FALSE	NA	FALSE	FALSE	NA	FALSE	NA	NA	FALSE	FALSE	FALSE	FALSE	FALSE
HTP0445	T21	Female	38.8	FALSE	NA	FALSE	NA	FALSE	NA	FALSE	NA	NA	FALSE	FALSE	FALSE	TRUE	FALSE	FALSE	NA	FALSE	NA	NA	NA	FALSE	FALSE	NA	FALSE	FALSE	NA	FALSE	NA	NA	FALSE	FALSE	FALSE	FALSE	FALSE
HTP0446	T21	Female	31.7	FALSE	FALSE	FALSE	FALSE	FALSE	FALSE	FALSE	FALSE	FALSE	FALSE	FALSE	FALSE	FALSE	FALSE	FALSE	FALSE	FALSE	FALSE	FALSE	FALSE	FALSE	FALSE	FALSE	FALSE	FALSE	FALSE	NA	FALSE	FALSE	FALSE	FALSE	FALSE	FALSE	FALSE
HTP0448	T21	Male	21.5	FALSE	FALSE	FALSE	FALSE	FALSE	FALSE	FALSE	FALSE	FALSE	FALSE	FALSE	FALSE	FALSE	FALSE	FALSE	FALSE	FALSE	FALSE	FALSE	FALSE	FALSE	FALSE	FALSE	FALSE	FALSE	FALSE	NA	FALSE	FALSE	FALSE	FALSE	FALSE	FALSE	FALSE
HTP0449	T21	Male	20.8	TRUE	NA	TRUE	NA	FALSE	NA	FALSE	NA	NA	FALSE	FALSE	FALSE	FALSE	FALSE	FALSE	NA	FALSE	NA	NA	NA	FALSE	FALSE	NA	FALSE	NA	NA	TRUE	NA	NA	FALSE	FALSE	FALSE	FALSE	FALSE
HTP0450	T21	Male	15.4	FALSE	TRUE	TRUE	TRUE	FALSE	FALSE	TRUE	FALSE	FALSE	FALSE	FALSE	FALSE	FALSE	FALSE	FALSE	FALSE	FALSE	FALSE	FALSE	FALSE	FALSE	FALSE	FALSE	FALSE	FALSE	FALSE	NA	FALSE	FALSE	FALSE	FALSE	FALSE	FALSE	FALSE
HTP0451	T21	Male	32.5	FALSE	FALSE	FALSE	FALSE	FALSE	FALSE	FALSE	FALSE	FALSE	FALSE	FALSE	FALSE	FALSE	FALSE	FALSE	FALSE	FALSE	FALSE	FALSE	FALSE	FALSE	FALSE	FALSE	FALSE	FALSE	FALSE	TRUE	FALSE	FALSE	FALSE	FALSE	FALSE	FALSE	FALSE
HTP0452	T21	Female	16.6	FALSE	NA	FALSE	NA	FALSE	NA	FALSE	NA	NA	FALSE	FALSE	FALSE	FALSE	FALSE	FALSE	NA	FALSE	NA	NA	NA	FALSE	FALSE	NA	FALSE	NA	NA	FALSE	NA	NA	FALSE	FALSE	FALSE	FALSE	FALSE
HTP0453	T21	Male	19.8	FALSE	TRUE	FALSE	FALSE	FALSE	FALSE	FALSE	FALSE	FALSE	FALSE	FALSE	TRUE	FALSE	FALSE	FALSE	NA	FALSE	NA	NA	NA	FALSE	FALSE	FALSE	FALSE	FALSE	NA	NA	NA	NA	FALSE	FALSE	FALSE	FALSE	FALSE
HTP0454	T21	Male	21.7	FALSE	NA	FALSE	NA	FALSE	NA	FALSE	NA	FALSE	TRUE	FALSE	TRUE	FALSE	FALSE	TRUE	NA	FALSE	NA	NA	NA	FALSE	FALSE	NA	FALSE	NA	NA	TRUE	NA	NA	FALSE	FALSE	FALSE	FALSE	FALSE
HTP0456	T21	Male	7.3	FALSE	NA	FALSE	NA	FALSE	NA	FALSE	NA	NA	FALSE	FALSE	FALSE	FALSE	FALSE	FALSE	NA	FALSE	NA	NA	NA	FALSE	FALSE	NA	FALSE	NA	NA	NA	NA	NA	FALSE	FALSE	FALSE	FALSE	FALSE
HTP0458	T21	Male	20	FALSE	FALSE	FALSE	FALSE	FALSE	FALSE	FALSE	FALSE	FALSE	FALSE	FALSE	FALSE	FALSE	FALSE	FALSE	FALSE	FALSE	FALSE	FALSE	FALSE	FALSE	FALSE	FALSE	FALSE	TRUE	FALSE	NA	FALSE	FALSE	FALSE	FALSE	FALSE	FALSE	FALSE
HTP0459	T21	Male	13.7	FALSE	TRUE	FALSE	NA	FALSE	NA	FALSE	NA	NA	FALSE	FALSE	FALSE	FALSE	FALSE	FALSE	NA	FALSE	NA	NA	NA	FALSE	FALSE	NA	FALSE	NA	NA	NA	NA	NA	FALSE	FALSE	FALSE	FALSE	FALSE
HTP0460	T21	Male	20.3	FALSE	NA	TRUE	NA	FALSE	NA	FALSE	NA	FALSE	FALSE	FALSE	TRUE	FALSE	FALSE	FALSE	FALSE	FALSE	FALSE	FALSE	FALSE	FALSE	FALSE	NA	FALSE	NA	NA	TRUE	NA	NA	FALSE	FALSE	FALSE	FALSE	FALSE
HTP0461	T21	Female	12.5	FALSE	NA	FALSE	NA	FALSE	NA	FALSE	NA	NA	FALSE	FALSE	FALSE	FALSE	FALSE	FALSE	NA	FALSE	NA	NA	NA	FALSE	FALSE	NA	FALSE	NA	NA	NA	NA	NA	FALSE	FALSE	FALSE	FALSE	FALSE
HTP0462	T21	Male	38.6	FALSE	TRUE	FALSE	NA	FALSE	NA	FALSE	NA	FALSE	FALSE	FALSE	TRUE	FALSE	FALSE	FALSE	NA	FALSE	NA	NA	NA	FALSE	FALSE	FALSE	FALSE	TRUE	FALSE	TRUE	NA	NA	FALSE	FALSE	FALSE	FALSE	FALSE
HTP0463	T21	Female	28.3	FALSE	FALSE	FALSE	FALSE	FALSE	FALSE	TRUE	FALSE	FALSE	FALSE	FALSE	TRUE	FALSE	FALSE	FALSE	FALSE	FALSE	FALSE	FALSE	FALSE	FALSE	FALSE	FALSE	FALSE	TRUE	FALSE	NA	FALSE	FALSE	FALSE	FALSE	FALSE	FALSE	FALSE
HTP0464	T21	Male	22.7	FALSE	FALSE	FALSE	FALSE	FALSE	FALSE	FALSE	FALSE	FALSE	FALSE	FALSE	TRUE	FALSE	FALSE	FALSE	FALSE	FALSE	FALSE	FALSE	FALSE	FALSE	FALSE	FALSE	FALSE	FALSE	TRUE	NA	FALSE	FALSE	FALSE	FALSE	FALSE	FALSE	FALSE
HTP0465	T21	Female	6.8	FALSE	FALSE	FALSE	FALSE	FALSE	FALSE	FALSE	NA	FALSE	FALSE	FALSE	TRUE	FALSE	FALSE	FALSE	FALSE	FALSE	FALSE	FALSE	FALSE	FALSE	TRUE	FALSE	FALSE	FALSE	FALSE	NA	NA	NA	FALSE	FALSE	FALSE	FALSE	FALSE
HTP0467	T21	Female	32.5	FALSE	FALSE	FALSE	FALSE	FALSE	FALSE	FALSE	FALSE	FALSE	FALSE	FALSE	TRUE	FALSE	FALSE	FALSE	FALSE	FALSE	FALSE	FALSE	FALSE	FALSE	FALSE	FALSE	FALSE	TRUE	FALSE	NA	FALSE	FALSE	FALSE	FALSE	FALSE	FALSE	FALSE
HTP0468	T21	Male	28.8	FALSE	NA	FALSE	NA	FALSE	NA	FALSE	NA	FALSE	FALSE	FALSE	TRUE	FALSE	FALSE	FALSE	NA	FALSE	NA	NA	NA	FALSE	FALSE	NA	FALSE	NA	NA	NA	FALSE	FALSE	FALSE	FALSE	FALSE	FALSE	FALSE
HTP0469	T21	Female	16.7	FALSE	TRUE	FALSE	TRUE	FALSE	FALSE	FALSE	FALSE	FALSE	FALSE	FALSE	FALSE	FALSE	FALSE	FALSE	FALSE	FALSE	FALSE	FALSE	FALSE	FALSE	FALSE	FALSE	FALSE	FALSE	FALSE	NA	FALSE	FALSE	FALSE	FALSE	FALSE	FALSE	FALSE
HTP0470	T21	Female	4.2	FALSE	FALSE	FALSE	FALSE	FALSE	FALSE	FALSE	FALSE	FALSE	FALSE	FALSE	TRUE	FALSE	FALSE	FALSE	FALSE	TRUE	FALSE	FALSE	FALSE	FALSE	FALSE	FALSE	FALSE	TRUE	FALSE	TRUE	FALSE	FALSE	FALSE	FALSE	FALSE	FALSE	FALSE
HTP0471	T21	Female	9	FALSE	NA	FALSE	NA	FALSE	NA	FALSE	NA	NA	FALSE	FALSE	FALSE	FALSE	FALSE	FALSE	NA	FALSE	NA	NA	NA	FALSE	FALSE	NA	FALSE	NA	NA	NA	NA	NA	FALSE	FALSE	FALSE	FALSE	FALSE
HTP0472	T21	Male	1	FALSE	TRUE	FALSE	FALSE	FALSE	FALSE	FALSE	FALSE	FALSE	FALSE	FALSE	TRUE	FALSE	FALSE	FALSE	FALSE	FALSE	FALSE	FALSE	FALSE	FALSE	FALSE	FALSE	FALSE	FALSE	FALSE	NA	FALSE	FALSE	FALSE	FALSE	FALSE	FALSE	FALSE
HTP0473	T21	Male	17.1	FALSE	FALSE	FALSE	NA	FALSE	FALSE	FALSE	NA	FALSE	FALSE	FALSE	FALSE	FALSE	FALSE	FALSE	NA	FALSE	NA	NA	NA	FALSE	FALSE	NA	FALSE	NA	FALSE	FALSE	NA	NA	FALSE	FALSE	FALSE	FALSE	FALSE
HTP0474	T21	Male	29.6	FALSE	NA	FALSE	NA	FALSE	NA	FALSE	NA	FALSE	FALSE	FALSE	TRUE	FALSE	FALSE	FALSE	NA	FALSE	NA	NA	NA	FALSE	FALSE	NA	FALSE	NA	NA	NA	FALSE	FALSE	FALSE	FALSE	FALSE	FALSE	FALSE
HTP0475	T21	Female	22	FALSE	FALSE	FALSE	FALSE	FALSE	FALSE	FALSE	FALSE	FALSE	FALSE	FALSE	FALSE	FALSE	FALSE	FALSE	FALSE	FALSE	FALSE	TRUE	FALSE	FALSE	FALSE	FALSE	FALSE	FALSE	FALSE	NA	FALSE	FALSE	FALSE	FALSE	FALSE	FALSE	FALSE
HTP0476	T21	Female	11.1	TRUE	NA	FALSE	NA	FALSE	NA	FALSE	NA	FALSE	FALSE	FALSE	TRUE	FALSE	FALSE	FALSE	NA	FALSE	NA	NA	NA	FALSE	FALSE	NA	FALSE	NA	NA	TRUE	NA	NA	FALSE	FALSE	FALSE	FALSE	FALSE
HTP0477	T21	Male	3.4	TRUE	NA	FALSE	NA	FALSE	NA	FALSE	NA	FALSE	FALSE	FALSE	TRUE	FALSE	FALSE	FALSE	NA	FALSE	NA	NA	NA	FALSE	FALSE	NA	FALSE	NA	NA	TRUE	NA	NA	FALSE	FALSE	FALSE	FALSE	FALSE
HTP0478	T21	Female	40.3	FALSE	FALSE	FALSE	FALSE	FALSE	FALSE	FALSE	FALSE	FALSE	FALSE	FALSE	FALSE	FALSE	FALSE	FALSE	FALSE	FALSE	FALSE	FALSE	FALSE	FALSE	FALSE	FALSE	FALSE	FALSE	FALSE	NA	FALSE	FALSE	FALSE	FALSE	FALSE	FALSE	FALSE
HTP0479	T21	Male	3.7	FALSE	FALSE	FALSE	FALSE	FALSE	FALSE	FALSE	FALSE	FALSE	FALSE	FALSE	TRUE	FALSE	FALSE	FALSE	NA	FALSE	NA	NA	NA	FALSE	FALSE	NA	FALSE	TRUE	NA	FALSE	FALSE	FALSE	FALSE	FALSE	FALSE	FALSE	FALSE
HTP0480	T21	Female	21.9	FALSE	FALSE	FALSE	FALSE	FALSE	FALSE	FALSE	FALSE	FALSE	FALSE	FALSE	TRUE	FALSE	FALSE	FALSE	FALSE	FALSE	FALSE	FALSE	FALSE	FALSE	FALSE	FALSE	FALSE	FALSE	FALSE	NA	FALSE	FALSE	FALSE	FALSE	FALSE	FALSE	FALSE
HTP0482	T21	Male	19.3	NA	NA	NA	NA	NA	NA	NA	NA	FALSE	FALSE	FALSE	TRUE	FALSE	FALSE	FALSE	NA	NA	NA	NA	NA	NA	FALSE	NA	NA	NA	NA	NA	FALSE	FALSE	FALSE	FALSE	FALSE	FALSE	FALSE
HTP0483	T21	Female	21.9	FALSE	FALSE	FALSE	FALSE	FALSE	FALSE	FALSE	FALSE	FALSE	FALSE	FALSE	TRUE	FALSE	FALSE	FALSE	FALSE	FALSE	FALSE	FALSE	FALSE	FALSE	FALSE	FALSE	FALSE	FALSE	FALSE	NA	FALSE	FALSE	FALSE	FALSE	FALSE	FALSE	FALSE
HTP0484	T21	Male	5.6	FALSE	NA	FALSE	NA	FALSE	NA	FALSE	NA	NA	FALSE	FALSE	FALSE	FALSE	FALSE	FALSE	NA	FALSE	NA	NA	NA	FALSE	FALSE	NA	FALSE	NA	NA	TRUE	NA	NA	FALSE	FALSE	FALSE	FALSE	FALSE
HTP0485	T21	Female	5.7	FALSE	TRUE	FALSE	FALSE	FALSE	FALSE	FALSE	FALSE	FALSE	FALSE	FALSE	TRUE	FALSE	FALSE	FALSE	FALSE	FALSE	FALSE	FALSE	FALSE	FALSE	FALSE	FALSE	FALSE	FALSE	TRUE	NA	FALSE	FALSE	FALSE	FALSE	FALSE	FALSE	FALSE
HTP0486	T21	Male	3.6	FALSE	FALSE	FALSE	FALSE	FALSE	FALSE	FALSE	FALSE	FALSE	FALSE	FALSE	TRUE	FALSE	FALSE	FALSE	FALSE	FALSE	FALSE	FALSE	FALSE	FALSE	FALSE	FALSE	FALSE	FALSE	FALSE	TRUE	FALSE	FALSE	FALSE	FALSE	FALSE	FALSE	FALSE
HTP0487	T21	Male	4.6	NA	NA	NA	NA	NA	NA	NA	NA	FALSE	FALSE	FALSE	TRUE	FALSE	FALSE	FALSE	NA	NA	NA	NA	NA	NA	FALSE	FALSE	NA	FALSE	NA	NA	FALSE	FALSE	FALSE	FALSE	FALSE	FALSE	FALSE
HTP0488	T21	Male	5.4	FALSE	FALSE	FALSE	FALSE	FALSE	FALSE	FALSE	FALSE	FALSE	FALSE	FALSE	TRUE	FALSE	FALSE	FALSE	FALSE	FALSE	FALSE	FALSE	FALSE	FALSE	FALSE	FALSE	FALSE	TRUE	TRUE	FALSE	FALSE	FALSE	FALSE	FALSE	FALSE	FALSE	FALSE
HTP0490	T21	Male	1.7	FALSE	TRUE	FALSE	FALSE	FALSE	FALSE	FALSE	FALSE	FALSE	FALSE	FALSE	FALSE	FALSE	FALSE	FALSE	FALSE	FALSE	FALSE	FALSE	FALSE	FALSE	FALSE	FALSE	FALSE	FALSE	FALSE	NA	FALSE	FALSE	FALSE	FALSE	FALSE	FALSE	FALSE
HTP0491	T21	Male	6.5	FALSE	FALSE	FALSE	FALSE	FALSE	FALSE	FALSE	FALSE	FALSE	FALSE	FALSE	FALSE	FALSE	FALSE	FALSE	FALSE	FALSE	FALSE	FALSE	FALSE	FALSE	FALSE	FALSE	FALSE	TRUE	FALSE	NA	FALSE	FALSE	FALSE	FALSE	FALSE	FALSE	FALSE
HTP0494	T21	Female	7.1	FALSE	TRUE	FALSE	FALSE	FALSE	FALSE	FALSE	FALSE	FALSE	FALSE	FALSE	FALSE	FALSE	FALSE	FALSE	FALSE	FALSE	FALSE	FALSE	FALSE	FALSE	FALSE	FALSE	FALSE	TRUE	TRUE	NA	FALSE	FALSE	FALSE	FALSE	FALSE	FALSE	FALSE
HTP0501	T21	Male	4	FALSE	FALSE	FALSE	FALSE	FALSE	FALSE	FALSE	FALSE	FALSE	FALSE	FALSE	TRUE	FALSE	FALSE	FALSE	FALSE	TRUE	FALSE	FALSE	FALSE	FALSE	FALSE	FALSE	FALSE	FALSE	FALSE	NA	FALSE	FALSE	FALSE	FALSE	FALSE	FALSE	FALSE
HTP0507	T21	Male	8.2	FALSE	FALSE	FALSE	FALSE	FALSE	FALSE	FALSE	FALSE	FALSE	FALSE	FALSE	TRUE	FALSE	FALSE	FALSE	FALSE	FALSE	FALSE	FALSE	FALSE	FALSE	FALSE	FALSE	FALSE	TRUE	FALSE	NA	FALSE	FALSE	FALSE	FALSE	FALSE	FALSE	FALSE
HTP0510	T21	Female	23	FALSE	FALSE	FALSE	FALSE	FALSE	FALSE	FALSE	FALSE	FALSE	TRUE	FALSE	TRUE	FALSE	FALSE	TRUE	FALSE	TRUE	FALSE	FALSE	FALSE	FALSE	FALSE	FALSE	FALSE	FALSE	FALSE	TRUE	FALSE	FALSE	FALSE	FALSE	FALSE	FALSE	FALSE
HTP0512	T21	Male	30	FALSE	FALSE	FALSE	FALSE	FALSE	FALSE	FALSE	FALSE	FALSE	FALSE	FALSE	TRUE	FALSE	FALSE	FALSE	FALSE	FALSE	FALSE	FALSE	FALSE	FALSE	TRUE	FALSE	FALSE	NA	FALSE	NA	FALSE	FALSE	FALSE	FALSE	FALSE	FALSE	FALSE
HTP0514	T21	Female	3.6	FALSE	NA	FALSE	NA	FALSE	NA	NA	NA	FALSE	FALSE	FALSE	TRUE	TRUE	FALSE	FALSE	FALSE	FALSE	FALSE	FALSE	FALSE	FALSE	FALSE	FALSE	NA	FALSE	NA	NA	FALSE	FALSE	FALSE	FALSE	FALSE	FALSE	FALSE
HTP0515	T21	Male	13.1	FALSE	FALSE	FALSE	FALSE	FALSE	FALSE	FALSE	FALSE	FALSE	FALSE	FALSE	FALSE	FALSE	FALSE	FALSE	FALSE	FALSE	FALSE	FALSE	FALSE	FALSE	FALSE	FALSE	FALSE	FALSE	FALSE	NA	FALSE	FALSE	FALSE	FALSE	FALSE	FALSE	FALSE
HTP0516	T21	Male	39.1	FALSE	NA	FALSE	NA	FALSE	NA	FALSE	NA	NA	FALSE	FALSE	FALSE	FALSE	FALSE	FALSE	NA	FALSE	NA	NA	NA	FALSE	FALSE	NA	FALSE	NA	NA	TRUE	NA	NA	FALSE	FALSE	FALSE	FALSE	FALSE
HTP0517	T21	Male	2.7	FALSE	FALSE	FALSE	FALSE	FALSE	FALSE	FALSE	FALSE	FALSE	FALSE	FALSE	FALSE	FALSE	FALSE	FALSE	FALSE	FALSE	FALSE	FALSE	FALSE	FALSE	FALSE	FALSE	FALSE	TRUE	FALSE	NA	FALSE	FALSE	FALSE	FALSE	FALSE	FALSE	FALSE
HTP0518	T21	Male	15.9	TRUE	TRUE	FALSE	FALSE	FALSE	FALSE	FALSE	FALSE	FALSE	FALSE	FALSE	TRUE	FALSE	FALSE	FALSE	FALSE	FALSE	FALSE	FALSE	FALSE	FALSE	FALSE	FALSE	FALSE	TRUE	FALSE	NA	FALSE	FALSE	FALSE	FALSE	FALSE	FALSE	FALSE
HTP0519	T21	Male	2	FALSE	FALSE	FALSE	FALSE	FALSE	FALSE	FALSE	FALSE	FALSE	FALSE	FALSE	FALSE	FALSE	FALSE	FALSE	FALSE	FALSE	FALSE	FALSE	FALSE	FALSE	FALSE	FALSE	FALSE	FALSE	FALSE	TRUE	FALSE	FALSE	FALSE	FALSE	FALSE	FALSE	FALSE
HTP0522	T21	Male	13.5	FALSE	NA	FALSE	NA	FALSE	NA	FALSE	NA	NA	FALSE	FALSE	FALSE	FALSE	FALSE	FALSE	NA	FALSE	NA	NA	NA	FALSE	FALSE	NA	FALSE	NA	NA	NA	FALSE	FALSE	TRUE	FALSE	FALSE	FALSE	FALSE
HTP0525	T21	Female	34.2	FALSE	NA	TRUE	NA	FALSE	NA	FALSE	NA	FALSE	FALSE	FALSE	TRUE	FALSE	FALSE	FALSE	NA	NA	NA	NA	NA	FALSE	FALSE	NA	FALSE	FALSE	NA	TRUE	NA	NA	FALSE	FALSE	FALSE	FALSE	FALSE
HTP0530	T21	Female	39.6	NA	NA	NA	NA	NA	NA	NA	NA	NA	NA	NA	NA	NA	NA	NA	NA	NA	NA	NA	NA	NA	NA	NA	NA	NA	NA	NA	FALSE	FALSE	FALSE	FALSE	FALSE	FALSE	FALSE
HTP0531	T21	Female	3.5	FALSE	FALSE	FALSE	FALSE	FALSE	FALSE	FALSE	FALSE	FALSE	FALSE	FALSE	FALSE	FALSE	FALSE	FALSE	FALSE	FALSE	FALSE	FALSE	FALSE	FALSE	FALSE	FALSE	FALSE	FALSE	FALSE	NA	FALSE	FALSE	FALSE	FALSE	FALSE	FALSE	FALSE
HTP0532	T21	Male	30.6	FALSE	FALSE	FALSE	FALSE	FALSE	FALSE	FALSE	NA	FALSE	FALSE	FALSE	FALSE	FALSE	FALSE	FALSE	NA	FALSE	NA	NA	NA	FALSE	FALSE	NA	FALSE	NA	FALSE	NA	NA	NA	FALSE	FALSE	FALSE	FALSE	FALSE
HTP0534	T21	Male	36.9	FALSE	TRUE	FALSE	FALSE	FALSE	FALSE	FALSE	NA	FALSE	FALSE	FALSE	FALSE	FALSE	FALSE	FALSE	NA	FALSE	NA	NA	NA	FALSE	FALSE	NA	FALSE	NA	FALSE	NA	FALSE	FALSE	FALSE	FALSE	FALSE	FALSE	FALSE
HTP0535	T21	Male	23.6	FALSE	FALSE	FALSE	FALSE	FALSE	FALSE	FALSE	NA	FALSE	FALSE	FALSE	FALSE	FALSE	FALSE	FALSE	NA	FALSE	NA	NA	NA	FALSE	FALSE	NA	FALSE	NA	FALSE	TRUE	FALSE	FALSE	FALSE	FALSE	FALSE	FALSE	FALSE
HTP0536	T21	Female	32	TRUE	FALSE	FALSE	FALSE	FALSE	TRUE	FALSE	FALSE	FALSE	TRUE	FALSE	TRUE	FALSE	FALSE	FALSE	FALSE	TRUE	FALSE	FALSE	FALSE	FALSE	FALSE	NA	FALSE	FALSE	NA	NA	NA	NA	NA	NA	NA	NA	NA
HTP0537	T21	Female	51.9	FALSE	FALSE	FALSE	FALSE	FALSE	FALSE	FALSE	NA	FALSE	FALSE	FALSE	TRUE	FALSE	FALSE	FALSE	NA	FALSE	NA	NA	NA	FALSE	FALSE	NA	FALSE	NA	FALSE	FALSE	NA	NA	FALSE	FALSE	FALSE	FALSE	FALSE
HTP0538	T21	Male	28.4	TRUE	FALSE	FALSE	FALSE	FALSE	FALSE	FALSE	NA	FALSE	FALSE	FALSE	TRUE	FALSE	FALSE	FALSE	NA	FALSE	NA	NA	NA	FALSE	FALSE	NA	FALSE	NA	FALSE	NA	FALSE	FALSE	FALSE	FALSE	FALSE	FALSE	FALSE
HTP0539	T21	Female	42.8	FALSE	FALSE	FALSE	FALSE	FALSE	NA	FALSE	NA	TRUE	FALSE	TRUE	TRUE	NA	FALSE	NA	NA	FALSE	NA	NA	NA	FALSE	FALSE	NA	FALSE	NA	FALSE	TRUE	NA	NA	FALSE	FALSE	FALSE	FALSE	FALSE
HTP0540	T21	Female	14.5	FALSE	FALSE	FALSE	FALSE	TRUE	FALSE	FALSE	NA	FALSE	FALSE	FALSE	TRUE	FALSE	FALSE	FALSE	NA	FALSE	NA	NA	NA	FALSE	FALSE	NA	FALSE	NA	FALSE	TRUE	NA	NA	FALSE	FALSE	FALSE	FALSE	FALSE
HTP0541	T21	Male	29.7	FALSE	FALSE	FALSE	FALSE	FALSE	FALSE	FALSE	FALSE	FALSE	FALSE	FALSE	TRUE	FALSE	FALSE	TRUE	FALSE	FALSE	FALSE	FALSE	FALSE	FALSE	FALSE	FALSE	FALSE	FALSE	FALSE	TRUE	FALSE	FALSE	FALSE	FALSE	FALSE	FALSE	FALSE
HTP0542	T21	Male	27.8	FALSE	FALSE	TRUE	FALSE	FALSE	FALSE	FALSE	NA	FALSE	FALSE	FALSE	TRUE	NA	FALSE	FALSE	NA	FALSE	NA	NA	NA	FALSE	FALSE	NA	FALSE	NA	TRUE	TRUE	NA	NA	FALSE	FALSE	FALSE	FALSE	FALSE
HTP0543	T21	Male	36.9	FALSE	FALSE	FALSE	FALSE	FALSE	FALSE	TRUE	FALSE	TRUE	TRUE	TRUE	TRUE	FALSE	FALSE	FALSE	FALSE	FALSE	FALSE	FALSE	FALSE	FALSE	FALSE	FALSE	FALSE	TRUE	TRUE	NA	FALSE	FALSE	FALSE	FALSE	FALSE	FALSE	FALSE
HTP0544	T21	Male	38.1	FALSE	FALSE	FALSE	FALSE	FALSE	FALSE	FALSE	NA	FALSE	FALSE	FALSE	FALSE	FALSE	FALSE	FALSE	NA	FALSE	NA	NA	NA	FALSE	FALSE	NA	FALSE	NA	FALSE	NA	FALSE	FALSE	FALSE	FALSE	FALSE	FALSE	FALSE
HTP0545	T21	Male	18.1	FALSE	FALSE	FALSE	FALSE	FALSE	FALSE	FALSE	NA	FALSE	FALSE	FALSE	TRUE	FALSE	FALSE	FALSE	NA	FALSE	NA	NA	NA	FALSE	FALSE	NA	FALSE	NA	FALSE	NA	FALSE	FALSE	FALSE	FALSE	FALSE	FALSE	FALSE
HTP0546	T21	Female	51.4	FALSE	FALSE	TRUE	FALSE	FALSE	FALSE	FALSE	NA	FALSE	FALSE	FALSE	NA	NA	NA	NA	NA	FALSE	NA	NA	NA	FALSE	FALSE	NA	NA	FALSE	NA	TRUE	NA	NA	FALSE	FALSE	FALSE	FALSE	FALSE
HTP0547	T21	Female	26	TRUE	TRUE	FALSE	FALSE	FALSE	FALSE	FALSE	NA	FALSE	FALSE	FALSE	TRUE	FALSE	FALSE	FALSE	NA	FALSE	NA	NA	NA	FALSE	FALSE	NA	FALSE	NA	FALSE	FALSE	NA	NA	FALSE	FALSE	FALSE	FALSE	FALSE
HTP0548	T21	Female	46.2	FALSE	FALSE	FALSE	FALSE	FALSE	FALSE	FALSE	NA	FALSE	FALSE	FALSE	NA	NA	NA	NA	NA	FALSE	NA	NA	NA	FALSE	FALSE	NA	FALSE	FALSE	FALSE	NA	FALSE	FALSE	FALSE	FALSE	FALSE	FALSE	FALSE
HTP0549	T21	Female	20.6	FALSE	TRUE	FALSE	FALSE	FALSE	TRUE	TRUE	NA	FALSE	FALSE	FALSE	FALSE	FALSE	FALSE	FALSE	NA	TRUE	NA	NA	NA	FALSE	FALSE	NA	FALSE	NA	TRUE	NA	FALSE	FALSE	FALSE	FALSE	FALSE	FALSE	FALSE
HTP0550	T21	Female	15.2	FALSE	FALSE	FALSE	FALSE	FALSE	FALSE	FALSE	FALSE	FALSE	FALSE	FALSE	FALSE	FALSE	FALSE	TRUE	FALSE	TRUE	FALSE	FALSE	FALSE	FALSE	FALSE	FALSE	FALSE	TRUE	FALSE	NA	FALSE	FALSE	FALSE	FALSE	FALSE	FALSE	FALSE
HTP0552	T21	Male	17	FALSE	TRUE	FALSE	FALSE	FALSE	FALSE	FALSE	FALSE	FALSE	FALSE	FALSE	TRUE	FALSE	FALSE	FALSE	FALSE	FALSE	FALSE	FALSE	FALSE	FALSE	FALSE	FALSE	FALSE	TRUE	FALSE	NA	FALSE	FALSE	FALSE	FALSE	FALSE	FALSE	FALSE
HTP0553	T21	Female	18.2	FALSE	FALSE	FALSE	TRUE	FALSE	NA	FALSE	NA	FALSE	FALSE	FALSE	FALSE	FALSE	NA	NA	NA	FALSE	NA	NA	NA	FALSE	FALSE	NA	FALSE	NA	FALSE	NA	FALSE	FALSE	FALSE	FALSE	FALSE	FALSE	FALSE
HTP0554	T21	Male	23.1	FALSE	FALSE	FALSE	FALSE	FALSE	FALSE	FALSE	NA	FALSE	FALSE	FALSE	FALSE	FALSE	FALSE	FALSE	NA	FALSE	NA	NA	NA	FALSE	FALSE	NA	FALSE	NA	FALSE	NA	NA	NA	FALSE	FALSE	FALSE	FALSE	FALSE
HTP0556	T21	Male	28.3	FALSE	FALSE	TRUE	TRUE	FALSE	FALSE	TRUE	FALSE	FALSE	FALSE	FALSE	TRUE	FALSE	FALSE	FALSE	FALSE	FALSE	FALSE	FALSE	FALSE	FALSE	FALSE	FALSE	FALSE	FALSE	TRUE	NA	FALSE	FALSE	FALSE	FALSE	FALSE	FALSE	FALSE
HTP0558	T21	Male	13.4	NA	NA	NA	NA	NA	NA	NA	NA	NA	NA	NA	NA	NA	NA	NA	NA	NA	NA	NA	NA	NA	NA	NA	NA	NA	NA	TRUE	NA	NA	FALSE	FALSE	FALSE	FALSE	FALSE
HTP0560	T21	Male	50.1	FALSE	TRUE	FALSE	TRUE	FALSE	FALSE	NA	NA	FALSE	FALSE	FALSE	FALSE	FALSE	FALSE	FALSE	NA	FALSE	NA	NA	NA	FALSE	FALSE	NA	FALSE	NA	FALSE	NA	FALSE	FALSE	FALSE	FALSE	FALSE	FALSE	FALSE
HTP0561	T21	Male	13.7	FALSE	FALSE	FALSE	FALSE	FALSE	FALSE	FALSE	FALSE	FALSE	FALSE	FALSE	TRUE	FALSE	FALSE	FALSE	FALSE	FALSE	FALSE	FALSE	FALSE	FALSE	FALSE	FALSE	FALSE	TRUE	NA	NA	FALSE	FALSE	FALSE	FALSE	FALSE	FALSE	FALSE
HTP0562	T21	Female	15.4	FALSE	FALSE	FALSE	FALSE	FALSE	FALSE	FALSE	FALSE	FALSE	FALSE	FALSE	FALSE	FALSE	FALSE	FALSE	FALSE	FALSE	FALSE	FALSE	FALSE	FALSE	FALSE	FALSE	FALSE	TRUE	NA	NA	FALSE	FALSE	FALSE	FALSE	FALSE	FALSE	FALSE
HTP0563	T21	Female	8.7	FALSE	FALSE	FALSE	FALSE	FALSE	FALSE	FALSE	NA	FALSE	FALSE	FALSE	TRUE	FALSE	FALSE	FALSE	NA	FALSE	NA	NA	NA	FALSE	FALSE	NA	FALSE	NA	FALSE	FALSE	NA	NA	FALSE	FALSE	FALSE	FALSE	FALSE
HTP0564	T21	Male	14.2	FALSE	FALSE	FALSE	FALSE	FALSE	FALSE	TRUE	NA	FALSE	FALSE	FALSE	FALSE	TRUE	FALSE	FALSE	NA	FALSE	NA	NA	NA	FALSE	FALSE	NA	FALSE	NA	FALSE	NA	FALSE	FALSE	FALSE	FALSE	FALSE	FALSE	FALSE
HTP0565	T21	Male	22.5	FALSE	TRUE	FALSE	FALSE	FALSE	FALSE	FALSE	NA	FALSE	FALSE	FALSE	FALSE	FALSE	FALSE	FALSE	NA	FALSE	NA	NA	NA	FALSE	FALSE	NA	FALSE	NA	FALSE	NA	NA	NA	FALSE	FALSE	FALSE	FALSE	FALSE
HTP0566	T21	Male	13.7	FALSE	TRUE	FALSE	FALSE	FALSE	FALSE	FALSE	FALSE	FALSE	FALSE	FALSE	TRUE	FALSE	FALSE	FALSE	FALSE	FALSE	FALSE	FALSE	FALSE	FALSE	FALSE	FALSE	FALSE	TRUE	FALSE	NA	FALSE	FALSE	FALSE	FALSE	FALSE	FALSE	FALSE
HTP0568	T21	Male	28.3	FALSE	FALSE	FALSE	FALSE	FALSE	TRUE	TRUE	FALSE	FALSE	FALSE	FALSE	FALSE	TRUE	FALSE	FALSE	FALSE	FALSE	FALSE	FALSE	FALSE	FALSE	FALSE	NA	FALSE	FALSE	NA	NA	FALSE	FALSE	FALSE	FALSE	FALSE	FALSE	FALSE
HTP0569	T21	Male	22.9	FALSE	FALSE	FALSE	FALSE	FALSE	FALSE	FALSE	NA	FALSE	FALSE	FALSE	FALSE	FALSE	FALSE	FALSE	NA	FALSE	NA	NA	NA	FALSE	FALSE	NA	FALSE	NA	FALSE	NA	NA	NA	FALSE	FALSE	FALSE	FALSE	FALSE
HTP0570	T21	Male	38.8	TRUE	TRUE	FALSE	FALSE	FALSE	FALSE	TRUE	NA	FALSE	FALSE	FALSE	TRUE	FALSE	FALSE	FALSE	NA	FALSE	NA	NA	NA	FALSE	FALSE	NA	FALSE	FALSE	FALSE	NA	NA	NA	FALSE	FALSE	FALSE	FALSE	FALSE
HTP0571	T21	Male	13.1	FALSE	FALSE	FALSE	FALSE	FALSE	FALSE	FALSE	NA	FALSE	FALSE	FALSE	FALSE	FALSE	FALSE	FALSE	NA	FALSE	NA	NA	NA	FALSE	FALSE	NA	FALSE	NA	FALSE	TRUE	NA	NA	FALSE	FALSE	FALSE	FALSE	FALSE
HTP0572	T21	Male	24.4	FALSE	TRUE	FALSE	FALSE	FALSE	FALSE	FALSE	NA	FALSE	TRUE	FALSE	TRUE	FALSE	FALSE	FALSE	NA	FALSE	NA	NA	NA	FALSE	FALSE	NA	FALSE	NA	TRUE	NA	NA	NA	FALSE	FALSE	FALSE	FALSE	FALSE
HTP0574	T21	Male	42.4	FALSE	FALSE	FALSE	FALSE	NA	FALSE	FALSE	NA	FALSE	FALSE	FALSE	FALSE	FALSE	FALSE	FALSE	NA	FALSE	NA	NA	NA	FALSE	FALSE	NA	FALSE	NA	FALSE	NA	NA	NA	FALSE	FALSE	FALSE	FALSE	FALSE
HTP0575	T21	Female	17.2	FALSE	FALSE	FALSE	FALSE	FALSE	TRUE	TRUE	FALSE	TRUE	TRUE	TRUE	TRUE	FALSE	TRUE	TRUE	FALSE	FALSE	FALSE	FALSE	FALSE	FALSE	FALSE	FALSE	FALSE	TRUE	FALSE	NA	FALSE	FALSE	TRUE	FALSE	FALSE	FALSE	FALSE
HTP0577	T21	Female	28.4	FALSE	FALSE	FALSE	TRUE	FALSE	TRUE	FALSE	NA	FALSE	FALSE	FALSE	TRUE	FALSE	FALSE	FALSE	NA	FALSE	NA	NA	NA	FALSE	FALSE	NA	FALSE	NA	FALSE	FALSE	NA	NA	FALSE	FALSE	FALSE	FALSE	FALSE
HTP0578	T21	Male	25.7	FALSE	FALSE	FALSE	FALSE	FALSE	FALSE	FALSE	NA	FALSE	FALSE	FALSE	TRUE	FALSE	FALSE	FALSE	NA	FALSE	NA	NA	NA	FALSE	FALSE	NA	FALSE	NA	FALSE	NA	NA	NA	FALSE	FALSE	FALSE	FALSE	FALSE
HTP0579	T21	Male	2.5	FALSE	FALSE	FALSE	FALSE	FALSE	FALSE	FALSE	NA	FALSE	FALSE	FALSE	FALSE	FALSE	FALSE	FALSE	NA	FALSE	NA	NA	NA	FALSE	FALSE	NA	FALSE	NA	FALSE	NA	NA	NA	FALSE	FALSE	FALSE	FALSE	FALSE
HTP0580	T21	Female	31.8	FALSE	FALSE	FALSE	FALSE	FALSE	FALSE	FALSE	FALSE	TRUE	FALSE	FALSE	TRUE	FALSE	FALSE	FALSE	FALSE	FALSE	FALSE	FALSE	FALSE	FALSE	FALSE	FALSE	FALSE	TRUE	TRUE	NA	FALSE	FALSE	FALSE	FALSE	FALSE	FALSE	FALSE
HTP0581	T21	Male	30.6	FALSE	FALSE	FALSE	FALSE	FALSE	FALSE	FALSE	NA	FALSE	FALSE	FALSE	FALSE	FALSE	FALSE	FALSE	NA	FALSE	NA	NA	NA	FALSE	FALSE	NA	FALSE	NA	TRUE	FALSE	NA	NA	FALSE	FALSE	FALSE	FALSE	FALSE
HTP0583	T21	Female	6.2	FALSE	TRUE	FALSE	FALSE	FALSE	FALSE	FALSE	NA	FALSE	FALSE	FALSE	FALSE	FALSE	FALSE	FALSE	NA	FALSE	NA	NA	NA	FALSE	FALSE	NA	FALSE	FALSE	FALSE	NA	FALSE	FALSE	FALSE	FALSE	FALSE	FALSE	FALSE
HTP0584	T21	Male	29.3	FALSE	FALSE	FALSE	FALSE	FALSE	FALSE	FALSE	NA	FALSE	FALSE	FALSE	FALSE	FALSE	FALSE	FALSE	NA	FALSE	NA	NA	NA	FALSE	FALSE	NA	FALSE	NA	FALSE	NA	NA	NA	FALSE	FALSE	FALSE	FALSE	FALSE
HTP0585	T21	Female	16.5	FALSE	FALSE	TRUE	FALSE	FALSE	FALSE	FALSE	NA	FALSE	FALSE	FALSE	FALSE	FALSE	FALSE	FALSE	NA	FALSE	NA	NA	NA	FALSE	TRUE	NA	FALSE	FALSE	FALSE	TRUE	NA	NA	FALSE	FALSE	FALSE	FALSE	FALSE
HTP0586	T21	Male	31.9	FALSE	FALSE	FALSE	TRUE	FALSE	FALSE	FALSE	NA	FALSE	FALSE	FALSE	FALSE	FALSE	FALSE	FALSE	FALSE	TRUE	FALSE	FALSE	FALSE	FALSE	FALSE	FALSE	FALSE	NA	FALSE	NA	NA	NA	FALSE	FALSE	FALSE	FALSE	FALSE
HTP0587	T21	Male	4.3	FALSE	FALSE	FALSE	FALSE	FALSE	FALSE	FALSE	FALSE	FALSE	FALSE	FALSE	FALSE	FALSE	FALSE	FALSE	FALSE	FALSE	FALSE	FALSE	FALSE	FALSE	FALSE	FALSE	FALSE	TRUE	NA	NA	FALSE	FALSE	FALSE	FALSE	FALSE	FALSE	FALSE
HTP0588	T21	Female	19.2	FALSE	TRUE	FALSE	FALSE	FALSE	FALSE	FALSE	FALSE	FALSE	FALSE	FALSE	FALSE	FALSE	FALSE	FALSE	FALSE	FALSE	FALSE	FALSE	FALSE	FALSE	FALSE	FALSE	FALSE	TRUE	FALSE	NA	FALSE	FALSE	FALSE	FALSE	FALSE	FALSE	FALSE
HTP0589	T21	Female	19	FALSE	FALSE	FALSE	FALSE	FALSE	FALSE	TRUE	FALSE	FALSE	FALSE	FALSE	TRUE	FALSE	FALSE	FALSE	FALSE	TRUE	FALSE	FALSE	FALSE	FALSE	FALSE	FALSE	FALSE	FALSE	FALSE	NA	FALSE	FALSE	FALSE	FALSE	FALSE	FALSE	FALSE
HTP0590	T21	Male	16.8	FALSE	FALSE	FALSE	FALSE	FALSE	FALSE	FALSE	NA	FALSE	FALSE	FALSE	FALSE	FALSE	FALSE	FALSE	NA	FALSE	NA	NA	NA	FALSE	FALSE	NA	FALSE	NA	FALSE	NA	NA	NA	FALSE	FALSE	FALSE	FALSE	FALSE
HTP0591	T21	Male	31.9	NA	NA	NA	NA	NA	NA	NA	NA	FALSE	FALSE	FALSE	TRUE	FALSE	FALSE	FALSE	NA	NA	NA	NA	NA	NA	FALSE	NA	NA	NA	NA	NA	FALSE	FALSE	FALSE	FALSE	FALSE	FALSE	FALSE
HTP0592	T21	Female	14.5	FALSE	FALSE	FALSE	FALSE	FALSE	FALSE	FALSE	NA	FALSE	FALSE	FALSE	TRUE	NA	FALSE	FALSE	NA	FALSE	NA	NA	NA	FALSE	FALSE	NA	FALSE	NA	FALSE	FALSE	NA	NA	FALSE	FALSE	FALSE	FALSE	FALSE
HTP0593	T21	Male	11.7	FALSE	FALSE	FALSE	FALSE	FALSE	FALSE	FALSE	NA	FALSE	TRUE	FALSE	TRUE	FALSE	NA	TRUE	NA	FALSE	NA	NA	NA	FALSE	FALSE	NA	FALSE	NA	FALSE	FALSE	NA	NA	FALSE	FALSE	FALSE	FALSE	FALSE
HTP0594	T21	Male	30.1	FALSE	FALSE	FALSE	FALSE	FALSE	FALSE	FALSE	NA	FALSE	FALSE	FALSE	FALSE	FALSE	FALSE	FALSE	NA	FALSE	NA	NA	NA	FALSE	FALSE	NA	FALSE	NA	FALSE	NA	NA	NA	FALSE	FALSE	FALSE	FALSE	FALSE
HTP0596	T21	Female	28.3	FALSE	NA	TRUE	NA	FALSE	NA	NA	NA	FALSE	FALSE	FALSE	TRUE	FALSE	FALSE	FALSE	FALSE	FALSE	FALSE	FALSE	FALSE	FALSE	TRUE	NA	NA	NA	NA	FALSE	NA	NA	FALSE	FALSE	FALSE	FALSE	FALSE
HTP0597	T21	Female	12.5	NA	NA	NA	NA	NA	NA	NA	NA	NA	NA	NA	NA	NA	NA	NA	NA	NA	NA	NA	NA	NA	FALSE	NA	FALSE	FALSE	NA	NA	NA	NA	NA	NA	NA	NA	NA
HTP0598	T21	Female	18	FALSE	NA	FALSE	FALSE	FALSE	FALSE	FALSE	NA	FALSE	FALSE	FALSE	TRUE	FALSE	FALSE	FALSE	NA	FALSE	NA	NA	NA	FALSE	FALSE	NA	FALSE	NA	FALSE	TRUE	NA	NA	FALSE	FALSE	FALSE	FALSE	FALSE
HTP0599	T21	Female	36.6	FALSE	FALSE	FALSE	FALSE	FALSE	FALSE	FALSE	NA	FALSE	FALSE	FALSE	TRUE	FALSE	FALSE	FALSE	NA	FALSE	NA	NA	NA	FALSE	FALSE	NA	FALSE	FALSE	FALSE	NA	FALSE	FALSE	FALSE	FALSE	FALSE	FALSE	FALSE
HTP0600	T21	Male	10.8	FALSE	FALSE	FALSE	FALSE	FALSE	FALSE	FALSE	NA	FALSE	FALSE	FALSE	FALSE	FALSE	FALSE	FALSE	NA	FALSE	NA	NA	NA	FALSE	FALSE	NA	FALSE	NA	FALSE	TRUE	NA	NA	FALSE	FALSE	FALSE	FALSE	FALSE
HTP0601	T21	Male	12	FALSE	FALSE	FALSE	TRUE	FALSE	FALSE	FALSE	NA	FALSE	FALSE	FALSE	FALSE	FALSE	FALSE	FALSE	NA	FALSE	NA	NA	NA	FALSE	FALSE	NA	FALSE	NA	FALSE	NA	NA	NA	FALSE	FALSE	FALSE	FALSE	FALSE
HTP0602	T21	Female	13.5	FALSE	FALSE	FALSE	FALSE	FALSE	FALSE	TRUE	FALSE	TRUE	FALSE	TRUE	TRUE	FALSE	FALSE	FALSE	FALSE	FALSE	FALSE	FALSE	FALSE	FALSE	FALSE	FALSE	FALSE	TRUE	FALSE	FALSE	FALSE	FALSE	FALSE	FALSE	FALSE	FALSE	FALSE
HTP0603	T21	Female	12.7	FALSE	FALSE	FALSE	FALSE	FALSE	FALSE	FALSE	FALSE	FALSE	FALSE	FALSE	FALSE	FALSE	FALSE	FALSE	FALSE	FALSE	FALSE	FALSE	FALSE	FALSE	FALSE	FALSE	FALSE	TRUE	FALSE	FALSE	FALSE	FALSE	FALSE	FALSE	FALSE	FALSE	FALSE
HTP0604	T21	Female	26.6	FALSE	FALSE	TRUE	TRUE	FALSE	TRUE	FALSE	FALSE	FALSE	FALSE	FALSE	TRUE	FALSE	FALSE	FALSE	FALSE	FALSE	FALSE	FALSE	FALSE	FALSE	FALSE	FALSE	FALSE	FALSE	FALSE	FALSE	FALSE	FALSE	FALSE	FALSE	FALSE	FALSE	FALSE
HTP0605	T21	Male	17.5	FALSE	FALSE	FALSE	FALSE	FALSE	FALSE	FALSE	NA	FALSE	FALSE	FALSE	FALSE	FALSE	FALSE	FALSE	NA	FALSE	NA	NA	NA	FALSE	FALSE	NA	FALSE	FALSE	TRUE	FALSE	NA	NA	FALSE	FALSE	FALSE	FALSE	FALSE
HTP0606	T21	Female	26.6	FALSE	NA	TRUE	NA	FALSE	NA	NA	NA	FALSE	TRUE	FALSE	TRUE	FALSE	FALSE	FALSE	FALSE	FALSE	FALSE	FALSE	FALSE	FALSE	TRUE	NA	NA	NA	NA	NA	NA	NA	NA	NA	NA	NA	NA
HTP0607	T21	Male	23.9	FALSE	TRUE	FALSE	FALSE	FALSE	FALSE	FALSE	NA	FALSE	FALSE	FALSE	FALSE	FALSE	FALSE	FALSE	NA	FALSE	NA	NA	NA	FALSE	FALSE	NA	FALSE	NA	FALSE	TRUE	NA	NA	FALSE	FALSE	FALSE	FALSE	FALSE
HTP0608	T21	Female	32.5	FALSE	TRUE	FALSE	FALSE	FALSE	FALSE	FALSE	NA	FALSE	FALSE	FALSE	TRUE	FALSE	FALSE	FALSE	NA	FALSE	NA	NA	NA	FALSE	FALSE	NA	FALSE	FALSE	FALSE	FALSE	NA	NA	FALSE	FALSE	FALSE	FALSE	FALSE
HTP0609	T21	Female	4	FALSE	FALSE	FALSE	FALSE	FALSE	FALSE	FALSE	NA	FALSE	FALSE	FALSE	TRUE	FALSE	FALSE	FALSE	NA	FALSE	NA	NA	NA	FALSE	FALSE	NA	NA	NA	FALSE	TRUE	NA	NA	FALSE	FALSE	FALSE	FALSE	FALSE
HTP0610	T21	Female	17	FALSE	TRUE	FALSE	FALSE	FALSE	FALSE	TRUE	NA	FALSE	FALSE	FALSE	FALSE	FALSE	FALSE	FALSE	NA	FALSE	NA	NA	NA	FALSE	FALSE	NA	FALSE	NA	TRUE	FALSE	NA	NA	FALSE	FALSE	FALSE	FALSE	FALSE
HTP0611	T21	Female	23.9	FALSE	FALSE	FALSE	FALSE	FALSE	TRUE	FALSE	FALSE	TRUE	FALSE	TRUE	FALSE	FALSE	FALSE	FALSE	FALSE	FALSE	FALSE	FALSE	FALSE	FALSE	FALSE	NA	FALSE	TRUE	NA	NA	NA	NA	NA	NA	NA	NA	NA
HTP0612	T21	Male	11.4	FALSE	TRUE	FALSE	FALSE	FALSE	FALSE	FALSE	FALSE	FALSE	FALSE	FALSE	TRUE	FALSE	FALSE	FALSE	FALSE	FALSE	FALSE	FALSE	FALSE	FALSE	FALSE	FALSE	FALSE	TRUE	FALSE	NA	FALSE	FALSE	FALSE	FALSE	FALSE	FALSE	FALSE
HTP0613	T21	Female	10.3	FALSE	TRUE	FALSE	FALSE	FALSE	FALSE	FALSE	FALSE	FALSE	FALSE	FALSE	TRUE	FALSE	FALSE	FALSE	FALSE	TRUE	FALSE	FALSE	FALSE	FALSE	FALSE	FALSE	FALSE	TRUE	FALSE	NA	FALSE	FALSE	FALSE	FALSE	FALSE	FALSE	FALSE
HTP0614	T21	Male	1.2	NA	NA	NA	NA	NA	NA	NA	NA	FALSE	FALSE	FALSE	TRUE	FALSE	FALSE	FALSE	NA	NA	NA	NA	NA	NA	FALSE	NA	NA	NA	NA	NA	NA	NA	NA	NA	NA	NA	NA
HTP0616	T21	Male	19	FALSE	FALSE	FALSE	FALSE	FALSE	FALSE	FALSE	TRUE	FALSE	FALSE	FALSE	FALSE	FALSE	FALSE	FALSE	FALSE	FALSE	FALSE	FALSE	FALSE	FALSE	FALSE	FALSE	FALSE	FALSE	FALSE	FALSE	FALSE	FALSE	FALSE	FALSE	FALSE	FALSE	FALSE
HTP0617	T21	Male	30.5	FALSE	FALSE	FALSE	FALSE	FALSE	FALSE	FALSE	NA	FALSE	FALSE	FALSE	FALSE	FALSE	FALSE	FALSE	NA	FALSE	NA	NA	NA	FALSE	FALSE	NA	FALSE	NA	FALSE	NA	NA	NA	FALSE	FALSE	FALSE	FALSE	FALSE
HTP0618	T21	Female	37	FALSE	TRUE	FALSE	FALSE	FALSE	NA	NA	NA	FALSE	FALSE	FALSE	FALSE	FALSE	FALSE	FALSE	NA	FALSE	NA	NA	NA	FALSE	FALSE	NA	FALSE	NA	FALSE	NA	FALSE	FALSE	FALSE	FALSE	FALSE	FALSE	FALSE
HTP0619	T21	Female	37	FALSE	FALSE	FALSE	FALSE	FALSE	FALSE	FALSE	FALSE	FALSE	FALSE	FALSE	TRUE	FALSE	FALSE	FALSE	FALSE	FALSE	FALSE	FALSE	FALSE	FALSE	FALSE	FALSE	FALSE	FALSE	FALSE	NA	FALSE	FALSE	FALSE	FALSE	FALSE	FALSE	FALSE
HTP0620	T21	Female	19.6	FALSE	NA	FALSE	FALSE	FALSE	FALSE	FALSE	NA	FALSE	FALSE	TRUE	TRUE	TRUE	NA	NA	NA	FALSE	NA	NA	NA	FALSE	FALSE	NA	FALSE	NA	FALSE	NA	FALSE	FALSE	FALSE	FALSE	FALSE	FALSE	FALSE
HTP0621	T21	Female	21.4	FALSE	FALSE	FALSE	FALSE	FALSE	FALSE	FALSE	NA	FALSE	FALSE	FALSE	TRUE	FALSE	FALSE	FALSE	NA	FALSE	NA	NA	NA	FALSE	FALSE	NA	FALSE	FALSE	FALSE	TRUE	NA	NA	FALSE	FALSE	FALSE	FALSE	FALSE
HTP0622	T21	Female	26	TRUE	FALSE	NA	FALSE	FALSE	FALSE	FALSE	NA	FALSE	FALSE	TRUE	FALSE	FALSE	FALSE	FALSE	NA	FALSE	NA	NA	NA	FALSE	FALSE	NA	FALSE	NA	FALSE	NA	FALSE	FALSE	FALSE	FALSE	FALSE	FALSE	FALSE
HTP0623	T21	Female	28.1	FALSE	TRUE	FALSE	FALSE	FALSE	TRUE	FALSE	FALSE	FALSE	FALSE	FALSE	FALSE	FALSE	FALSE	FALSE	FALSE	FALSE	FALSE	FALSE	FALSE	FALSE	FALSE	FALSE	FALSE	FALSE	FALSE	TRUE	FALSE	FALSE	FALSE	FALSE	FALSE	FALSE	FALSE
HTP0624	T21	Female	28.1	FALSE	FALSE	FALSE	FALSE	FALSE	TRUE	TRUE	FALSE	FALSE	FALSE	FALSE	FALSE	FALSE	FALSE	FALSE	FALSE	FALSE	FALSE	FALSE	FALSE	FALSE	FALSE	NA	FALSE	FALSE	FALSE	NA	NA	NA	FALSE	FALSE	FALSE	FALSE	FALSE
HTP0625	T21	Male	40.1	FALSE	TRUE	FALSE	FALSE	FALSE	FALSE	FALSE	NA	FALSE	FALSE	FALSE	TRUE	FALSE	FALSE	FALSE	NA	FALSE	NA	NA	NA	FALSE	FALSE	NA	FALSE	NA	FALSE	TRUE	NA	NA	FALSE	FALSE	FALSE	FALSE	FALSE
HTP0626	T21	Male	14.2	FALSE	FALSE	FALSE	FALSE	FALSE	FALSE	FALSE	NA	FALSE	FALSE	FALSE	FALSE	FALSE	FALSE	FALSE	NA	FALSE	NA	NA	NA	FALSE	FALSE	NA	FALSE	NA	FALSE	NA	NA	NA	FALSE	FALSE	FALSE	FALSE	FALSE
HTP0627	T21	Female	21.1	FALSE	FALSE	FALSE	FALSE	FALSE	FALSE	TRUE	NA	FALSE	FALSE	FALSE	TRUE	FALSE	FALSE	TRUE	NA	FALSE	NA	NA	NA	FALSE	FALSE	NA	FALSE	NA	FALSE	TRUE	NA	NA	FALSE	FALSE	FALSE	FALSE	FALSE
HTP0629	T21	Female	7	FALSE	FALSE	FALSE	FALSE	FALSE	FALSE	FALSE	NA	FALSE	FALSE	FALSE	FALSE	FALSE	FALSE	FALSE	NA	FALSE	NA	NA	NA	FALSE	FALSE	NA	FALSE	NA	FALSE	NA	NA	NA	FALSE	FALSE	FALSE	FALSE	FALSE
HTP0630	T21	Male	39.9	TRUE	TRUE	FALSE	FALSE	FALSE	FALSE	FALSE	FALSE	FALSE	FALSE	FALSE	FALSE	FALSE	FALSE	FALSE	FALSE	FALSE	FALSE	FALSE	FALSE	FALSE	FALSE	FALSE	FALSE	TRUE	FALSE	NA	FALSE	FALSE	FALSE	FALSE	FALSE	FALSE	FALSE
HTP0631	T21	Female	33	FALSE	FALSE	FALSE	FALSE	FALSE	TRUE	TRUE	NA	FALSE	FALSE	FALSE	TRUE	FALSE	FALSE	FALSE	NA	FALSE	NA	NA	NA	FALSE	FALSE	NA	FALSE	NA	TRUE	TRUE	NA	NA	FALSE	FALSE	FALSE	FALSE	FALSE
HTP0632	T21	Female	26.4	FALSE	FALSE	FALSE	FALSE	FALSE	FALSE	FALSE	NA	FALSE	FALSE	FALSE	NA	NA	FALSE	FALSE	NA	FALSE	NA	NA	NA	FALSE	FALSE	NA	FALSE	NA	FALSE	TRUE	NA	NA	FALSE	FALSE	FALSE	FALSE	FALSE
HTP0633	T21	Male	33.1	FALSE	TRUE	TRUE	TRUE	FALSE	NA	FALSE	NA	FALSE	TRUE	FALSE	FALSE	FALSE	NA	NA	FALSE	FALSE	FALSE	FALSE	FALSE	FALSE	TRUE	NA	FALSE	FALSE	FALSE	NA	NA	NA	FALSE	FALSE	FALSE	FALSE	FALSE
HTP0634	T21	Male	20.4	TRUE	TRUE	FALSE	FALSE	FALSE	FALSE	FALSE	NA	FALSE	FALSE	FALSE	TRUE	NA	FALSE	FALSE	NA	FALSE	NA	NA	NA	FALSE	FALSE	NA	FALSE	NA	FALSE	NA	NA	NA	FALSE	FALSE	FALSE	FALSE	FALSE
HTP0635	T21	Male	1.5	FALSE	FALSE	FALSE	FALSE	FALSE	FALSE	FALSE	FALSE	FALSE	FALSE	FALSE	FALSE	FALSE	FALSE	FALSE	FALSE	FALSE	FALSE	FALSE	FALSE	FALSE	FALSE	FALSE	FALSE	TRUE	FALSE	NA	FALSE	FALSE	FALSE	FALSE	FALSE	FALSE	FALSE
HTP0636	T21	Male	32.8	FALSE	FALSE	FALSE	FALSE	FALSE	FALSE	FALSE	NA	FALSE	FALSE	FALSE	FALSE	FALSE	FALSE	FALSE	NA	FALSE	NA	NA	NA	FALSE	FALSE	NA	FALSE	NA	FALSE	TRUE	NA	NA	FALSE	FALSE	FALSE	FALSE	FALSE
HTP0637	T21	Female	20.1	FALSE	FALSE	TRUE	FALSE	FALSE	TRUE	TRUE	FALSE	FALSE	TRUE	FALSE	TRUE	FALSE	FALSE	FALSE	FALSE	FALSE	FALSE	FALSE	FALSE	FALSE	FALSE	FALSE	FALSE	TRUE	FALSE	NA	FALSE	FALSE	FALSE	FALSE	FALSE	FALSE	FALSE
HTP0638	T21	Female	32.7	FALSE	TRUE	FALSE	FALSE	FALSE	FALSE	FALSE	NA	FALSE	FALSE	FALSE	TRUE	FALSE	FALSE	FALSE	NA	FALSE	NA	NA	NA	FALSE	FALSE	NA	FALSE	NA	FALSE	FALSE	NA	NA	FALSE	FALSE	FALSE	FALSE	FALSE
HTP0639	T21	Male	27.3	TRUE	FALSE	FALSE	FALSE	FALSE	FALSE	FALSE	FALSE	NA	NA	NA	NA	NA	NA	NA	FALSE	FALSE	FALSE	FALSE	FALSE	FALSE	FALSE	NA	NA	NA	NA	NA	NA	NA	NA	NA	NA	NA	NA
HTP0640	T21	Male	26.1	FALSE	NA	TRUE	NA	FALSE	NA	NA	NA	NA	NA	NA	NA	NA	NA	NA	FALSE	FALSE	FALSE	FALSE	FALSE	FALSE	FALSE	NA	NA	NA	NA	NA	NA	NA	NA	NA	NA	NA	NA
HTP0641	T21	Male	46.6	FALSE	FALSE	FALSE	FALSE	FALSE	FALSE	FALSE	NA	FALSE	FALSE	FALSE	FALSE	FALSE	FALSE	FALSE	NA	FALSE	NA	NA	NA	FALSE	FALSE	NA	FALSE	NA	FALSE	NA	NA	NA	FALSE	FALSE	FALSE	FALSE	FALSE
HTP0642	T21	Female	25.2	FALSE	FALSE	TRUE	FALSE	FALSE	FALSE	FALSE	NA	FALSE	FALSE	FALSE	FALSE	FALSE	FALSE	FALSE	NA	FALSE	NA	NA	NA	FALSE	FALSE	NA	FALSE	NA	FALSE	NA	FALSE	FALSE	FALSE	FALSE	FALSE	FALSE	FALSE
HTP0643	T21	Male	29.7	NA	NA	NA	NA	NA	NA	NA	NA	NA	NA	NA	NA	NA	NA	NA	NA	NA	NA	NA	NA	NA	NA	NA	NA	NA	NA	TRUE	NA	NA	FALSE	FALSE	FALSE	FALSE	FALSE
HTP0644	T21	Male	28.7	FALSE	TRUE	TRUE	FALSE	FALSE	FALSE	TRUE	NA	FALSE	FALSE	FALSE	TRUE	FALSE	NA	NA	NA	FALSE	NA	NA	NA	FALSE	FALSE	NA	FALSE	NA	FALSE	FALSE	NA	NA	FALSE	FALSE	FALSE	FALSE	FALSE
HTP0645	T21	Male	28.4	FALSE	FALSE	FALSE	FALSE	FALSE	FALSE	FALSE	NA	FALSE	FALSE	FALSE	FALSE	FALSE	FALSE	FALSE	NA	FALSE	NA	NA	NA	FALSE	FALSE	NA	FALSE	NA	FALSE	NA	NA	NA	FALSE	FALSE	FALSE	FALSE	FALSE
HTP0646	T21	Male	17.1	FALSE	TRUE	TRUE	FALSE	FALSE	FALSE	TRUE	NA	FALSE	FALSE	FALSE	FALSE	FALSE	FALSE	FALSE	NA	FALSE	NA	NA	NA	FALSE	FALSE	NA	FALSE	NA	FALSE	NA	NA	NA	FALSE	FALSE	FALSE	FALSE	FALSE
HTP0647	T21	Male	7	FALSE	FALSE	FALSE	FALSE	FALSE	FALSE	FALSE	FALSE	FALSE	FALSE	FALSE	FALSE	FALSE	FALSE	FALSE	FALSE	FALSE	FALSE	FALSE	FALSE	FALSE	FALSE	FALSE	FALSE	FALSE	FALSE	NA	FALSE	FALSE	FALSE	FALSE	FALSE	FALSE	FALSE
HTP0650	T21	Female	45.7	FALSE	FALSE	FALSE	FALSE	FALSE	FALSE	FALSE	NA	FALSE	FALSE	NA	TRUE	NA	FALSE	FALSE	NA	FALSE	NA	NA	NA	FALSE	FALSE	NA	FALSE	NA	FALSE	NA	FALSE	FALSE	FALSE	FALSE	FALSE	FALSE	FALSE
HTP0651	T21	Male	31.2	NA	NA	NA	NA	NA	NA	NA	NA	TRUE	FALSE	TRUE	TRUE	FALSE	FALSE	FALSE	NA	NA	NA	NA	NA	NA	FALSE	NA	NA	FALSE	NA	TRUE	NA	NA	FALSE	FALSE	FALSE	FALSE	FALSE
HTP0652	T21	Female	35.1	FALSE	FALSE	FALSE	FALSE	FALSE	TRUE	FALSE	NA	FALSE	FALSE	TRUE	FALSE	FALSE	FALSE	FALSE	NA	FALSE	NA	NA	NA	FALSE	FALSE	NA	FALSE	FALSE	FALSE	NA	NA	NA	FALSE	FALSE	FALSE	FALSE	FALSE
HTP0654	T21	Female	26.9	FALSE	FALSE	FALSE	FALSE	FALSE	FALSE	FALSE	NA	FALSE	FALSE	FALSE	TRUE	FALSE	FALSE	FALSE	NA	FALSE	NA	NA	NA	FALSE	FALSE	NA	FALSE	NA	FALSE	FALSE	NA	NA	FALSE	FALSE	FALSE	FALSE	FALSE
HTP0656	T21	Female	7.6	FALSE	FALSE	FALSE	FALSE	FALSE	FALSE	FALSE	NA	FALSE	FALSE	FALSE	FALSE	NA	NA	FALSE	NA	FALSE	NA	NA	NA	FALSE	FALSE	NA	FALSE	NA	FALSE	NA	NA	NA	FALSE	FALSE	FALSE	FALSE	FALSE
HTP0657	T21	Male	16.9	FALSE	FALSE	FALSE	FALSE	FALSE	FALSE	FALSE	NA	FALSE	FALSE	FALSE	TRUE	FALSE	NA	FALSE	NA	FALSE	NA	NA	NA	FALSE	FALSE	NA	FALSE	NA	FALSE	NA	NA	NA	FALSE	FALSE	FALSE	FALSE	FALSE
HTP0658	T21	Male	15.3	FALSE	TRUE	FALSE	FALSE	FALSE	FALSE	TRUE	NA	FALSE	TRUE	FALSE	TRUE	FALSE	FALSE	TRUE	NA	FALSE	NA	NA	NA	FALSE	FALSE	NA	FALSE	NA	FALSE	TRUE	NA	NA	FALSE	FALSE	FALSE	FALSE	FALSE
HTP0659	T21	Female	36.5	FALSE	FALSE	FALSE	FALSE	FALSE	FALSE	FALSE	NA	FALSE	FALSE	FALSE	TRUE	NA	NA	FALSE	NA	FALSE	NA	NA	NA	FALSE	FALSE	NA	FALSE	NA	FALSE	NA	NA	NA	FALSE	FALSE	FALSE	FALSE	FALSE
HTP0660	T21	Male	13	FALSE	TRUE	FALSE	FALSE	FALSE	FALSE	FALSE	FALSE	FALSE	FALSE	FALSE	FALSE	TRUE	FALSE	FALSE	FALSE	FALSE	FALSE	FALSE	FALSE	FALSE	FALSE	FALSE	FALSE	TRUE	FALSE	NA	FALSE	FALSE	FALSE	FALSE	FALSE	FALSE	FALSE
HTP0661	T21	Male	28.4	FALSE	FALSE	FALSE	TRUE	FALSE	NA	NA	NA	FALSE	TRUE	FALSE	TRUE	FALSE	FALSE	FALSE	NA	FALSE	NA	NA	NA	FALSE	FALSE	NA	FALSE	NA	FALSE	NA	FALSE	FALSE	FALSE	FALSE	FALSE	FALSE	FALSE
HTP0662	T21	Female	26.1	FALSE	FALSE	FALSE	FALSE	FALSE	FALSE	FALSE	NA	FALSE	FALSE	FALSE	FALSE	FALSE	FALSE	FALSE	NA	FALSE	NA	NA	NA	FALSE	FALSE	NA	FALSE	NA	FALSE	NA	FALSE	FALSE	FALSE	FALSE	FALSE	FALSE	FALSE
HTP0663	T21	Female	20.5	FALSE	TRUE	FALSE	FALSE	FALSE	TRUE	FALSE	NA	FALSE	FALSE	FALSE	TRUE	FALSE	FALSE	FALSE	NA	FALSE	NA	NA	NA	FALSE	FALSE	NA	FALSE	NA	FALSE	NA	FALSE	FALSE	FALSE	FALSE	FALSE	FALSE	FALSE
HTP0664	T21	Female	29.4	FALSE	FALSE	FALSE	TRUE	FALSE	FALSE	FALSE	NA	TRUE	FALSE	FALSE	FALSE	FALSE	NA	NA	NA	FALSE	NA	NA	NA	FALSE	FALSE	NA	FALSE	NA	FALSE	FALSE	NA	NA	FALSE	FALSE	FALSE	FALSE	FALSE
HTP0665	T21	Female	23.4	NA	TRUE	NA	FALSE	NA	FALSE	FALSE	FALSE	FALSE	FALSE	FALSE	TRUE	FALSE	FALSE	FALSE	NA	NA	NA	NA	NA	NA	FALSE	NA	FALSE	FALSE	NA	NA	NA	NA	NA	NA	NA	NA	NA
HTP0666	T21	Male	17.4	FALSE	FALSE	FALSE	FALSE	FALSE	FALSE	TRUE	NA	FALSE	FALSE	FALSE	FALSE	FALSE	FALSE	FALSE	NA	FALSE	NA	NA	NA	FALSE	FALSE	NA	FALSE	FALSE	FALSE	TRUE	NA	NA	FALSE	FALSE	FALSE	FALSE	FALSE
HTP0667	T21	Male	24.1	TRUE	FALSE	FALSE	TRUE	FALSE	FALSE	TRUE	NA	FALSE	FALSE	FALSE	FALSE	FALSE	FALSE	FALSE	NA	FALSE	NA	NA	NA	FALSE	FALSE	NA	FALSE	NA	FALSE	FALSE	NA	NA	FALSE	FALSE	FALSE	FALSE	FALSE
HTP0668	T21	Female	29.7	FALSE	FALSE	FALSE	FALSE	FALSE	FALSE	FALSE	NA	FALSE	FALSE	NA	TRUE	FALSE	FALSE	FALSE	NA	FALSE	NA	NA	NA	FALSE	FALSE	NA	FALSE	FALSE	FALSE	TRUE	NA	NA	FALSE	FALSE	FALSE	FALSE	FALSE
HTP0670	T21	Female	30.7	FALSE	FALSE	FALSE	FALSE	FALSE	FALSE	FALSE	FALSE	FALSE	FALSE	FALSE	FALSE	FALSE	FALSE	FALSE	FALSE	FALSE	FALSE	FALSE	FALSE	FALSE	FALSE	FALSE	FALSE	TRUE	NA	NA	FALSE	FALSE	FALSE	FALSE	FALSE	FALSE	FALSE
HTP0672	T21	Male	17.2	FALSE	TRUE	FALSE	FALSE	FALSE	FALSE	FALSE	NA	FALSE	FALSE	FALSE	FALSE	FALSE	FALSE	FALSE	NA	FALSE	NA	NA	NA	FALSE	FALSE	NA	FALSE	NA	FALSE	NA	FALSE	FALSE	FALSE	FALSE	FALSE	FALSE	FALSE
HTP0676	T21	Female	19.3	FALSE	FALSE	FALSE	FALSE	FALSE	TRUE	FALSE	NA	FALSE	FALSE	TRUE	FALSE	FALSE	FALSE	FALSE	NA	FALSE	NA	NA	NA	FALSE	FALSE	NA	FALSE	FALSE	FALSE	NA	NA	NA	FALSE	FALSE	FALSE	FALSE	FALSE
HTP0679	T21	Female	12.5	FALSE	TRUE	FALSE	FALSE	FALSE	FALSE	FALSE	NA	FALSE	FALSE	FALSE	FALSE	FALSE	FALSE	FALSE	NA	FALSE	NA	NA	NA	FALSE	FALSE	NA	FALSE	NA	FALSE	NA	NA	NA	FALSE	FALSE	FALSE	FALSE	FALSE
HTP0680	T21	Male	5.9	FALSE	TRUE	FALSE	FALSE	FALSE	FALSE	FALSE	NA	FALSE	FALSE	FALSE	FALSE	FALSE	FALSE	FALSE	NA	FALSE	NA	NA	NA	FALSE	FALSE	NA	FALSE	NA	FALSE	NA	NA	NA	FALSE	FALSE	FALSE	FALSE	FALSE
HTP0681	T21	Female	5.2	FALSE	FALSE	FALSE	FALSE	FALSE	FALSE	FALSE	NA	FALSE	FALSE	FALSE	FALSE	FALSE	FALSE	FALSE	NA	FALSE	NA	NA	NA	FALSE	FALSE	NA	FALSE	NA	FALSE	NA	NA	NA	FALSE	FALSE	FALSE	FALSE	FALSE
HTP0683	T21	Female	13.2	FALSE	FALSE	FALSE	FALSE	FALSE	FALSE	FALSE	NA	NA	FALSE	FALSE	FALSE	FALSE	FALSE	FALSE	NA	FALSE	NA	NA	NA	FALSE	FALSE	NA	FALSE	NA	FALSE	TRUE	NA	NA	TRUE	FALSE	FALSE	FALSE	FALSE
HTP0686	T21	Female	7.4	FALSE	FALSE	FALSE	FALSE	FALSE	FALSE	FALSE	NA	FALSE	FALSE	FALSE	FALSE	FALSE	FALSE	FALSE	NA	FALSE	NA	NA	NA	FALSE	FALSE	NA	FALSE	NA	FALSE	NA	NA	NA	FALSE	FALSE	FALSE	FALSE	FALSE
HTP0687	T21	Female	16.4	FALSE	FALSE	FALSE	FALSE	FALSE	FALSE	FALSE	NA	FALSE	FALSE	FALSE	FALSE	FALSE	FALSE	FALSE	NA	FALSE	NA	NA	NA	FALSE	FALSE	NA	FALSE	NA	FALSE	NA	NA	NA	FALSE	FALSE	FALSE	FALSE	FALSE
HTP0688	T21	Female	16.7	FALSE	FALSE	TRUE	FALSE	FALSE	FALSE	FALSE	NA	FALSE	FALSE	TRUE	TRUE	FALSE	FALSE	FALSE	NA	FALSE	NA	NA	NA	FALSE	FALSE	NA	FALSE	NA	FALSE	TRUE	NA	NA	FALSE	FALSE	FALSE	FALSE	FALSE
HTP0689	T21	Female	41	FALSE	FALSE	FALSE	FALSE	FALSE	FALSE	FALSE	NA	FALSE	FALSE	FALSE	FALSE	FALSE	FALSE	FALSE	NA	FALSE	NA	NA	NA	FALSE	FALSE	NA	FALSE	NA	FALSE	NA	NA	NA	FALSE	FALSE	FALSE	FALSE	FALSE
HTP0690	T21	Female	2.8	FALSE	FALSE	FALSE	FALSE	FALSE	FALSE	FALSE	NA	FALSE	FALSE	FALSE	FALSE	FALSE	FALSE	FALSE	NA	FALSE	NA	NA	NA	FALSE	FALSE	NA	FALSE	NA	FALSE	FALSE	NA	NA	FALSE	FALSE	FALSE	FALSE	FALSE
HTP0693	T21	Female	15.8	FALSE	FALSE	FALSE	FALSE	FALSE	FALSE	FALSE	NA	FALSE	FALSE	FALSE	TRUE	NA	NA	FALSE	NA	FALSE	NA	NA	NA	FALSE	FALSE	NA	FALSE	NA	FALSE	NA	NA	NA	FALSE	FALSE	FALSE	FALSE	FALSE
HTP0702	T21	Female	23.4	FALSE	TRUE	FALSE	FALSE	FALSE	FALSE	TRUE	NA	FALSE	FALSE	FALSE	FALSE	FALSE	FALSE	FALSE	NA	FALSE	NA	NA	NA	FALSE	FALSE	NA	FALSE	NA	FALSE	NA	NA	NA	FALSE	FALSE	FALSE	FALSE	FALSE
HTP0703	T21	Male	3.5	FALSE	FALSE	FALSE	FALSE	FALSE	FALSE	FALSE	NA	FALSE	FALSE	NA	TRUE	NA	FALSE	NA	NA	FALSE	NA	NA	NA	FALSE	FALSE	NA	FALSE	NA	FALSE	NA	NA	NA	FALSE	FALSE	FALSE	FALSE	FALSE
HTP0705	T21	Female	8.6	FALSE	TRUE	FALSE	FALSE	FALSE	FALSE	FALSE	NA	FALSE	FALSE	FALSE	FALSE	FALSE	FALSE	FALSE	NA	FALSE	NA	NA	NA	FALSE	FALSE	NA	FALSE	NA	FALSE	NA	NA	NA	FALSE	FALSE	FALSE	FALSE	FALSE
HTP0706	T21	Female	22.8	TRUE	FALSE	FALSE	FALSE	FALSE	FALSE	FALSE	FALSE	FALSE	FALSE	FALSE	TRUE	FALSE	FALSE	FALSE	FALSE	FALSE	FALSE	FALSE	FALSE	FALSE	FALSE	FALSE	FALSE	FALSE	FALSE	NA	FALSE	FALSE	FALSE	FALSE	FALSE	FALSE	FALSE
HTP0708	T21	Male	17	FALSE	FALSE	FALSE	FALSE	FALSE	FALSE	TRUE	NA	FALSE	FALSE	FALSE	FALSE	FALSE	FALSE	FALSE	NA	FALSE	NA	NA	NA	FALSE	FALSE	NA	FALSE	NA	FALSE	FALSE	NA	NA	TRUE	FALSE	FALSE	FALSE	FALSE
HTP0710	T21	Female	21.6	FALSE	FALSE	TRUE	FALSE	TRUE	FALSE	FALSE	NA	FALSE	FALSE	FALSE	FALSE	FALSE	FALSE	FALSE	FALSE	FALSE	FALSE	FALSE	FALSE	FALSE	FALSE	NA	FALSE	NA	FALSE	TRUE	NA	NA	FALSE	FALSE	FALSE	FALSE	FALSE
HTP0711	T21	Female	16	FALSE	TRUE	FALSE	FALSE	FALSE	FALSE	FALSE	NA	FALSE	FALSE	FALSE	FALSE	FALSE	FALSE	FALSE	NA	TRUE	NA	NA	NA	FALSE	FALSE	NA	FALSE	NA	TRUE	TRUE	NA	NA	FALSE	FALSE	FALSE	FALSE	FALSE
HTP0712	T21	Female	26.3	TRUE	FALSE	TRUE	FALSE	FALSE	FALSE	FALSE	NA	FALSE	FALSE	FALSE	TRUE	FALSE	FALSE	FALSE	NA	TRUE	NA	NA	NA	FALSE	FALSE	NA	FALSE	NA	FALSE	TRUE	NA	NA	FALSE	FALSE	FALSE	FALSE	FALSE
HTP0713	T21	Male	4.2	FALSE	FALSE	FALSE	FALSE	FALSE	FALSE	TRUE	FALSE	FALSE	FALSE	FALSE	FALSE	FALSE	FALSE	FALSE	FALSE	FALSE	FALSE	FALSE	FALSE	FALSE	FALSE	FALSE	FALSE	FALSE	FALSE	NA	FALSE	FALSE	FALSE	FALSE	FALSE	FALSE	FALSE
HTP0714	T21	Female	20.5	TRUE	NA	FALSE	NA	FALSE	NA	NA	NA	NA	FALSE	FALSE	FALSE	FALSE	FALSE	FALSE	NA	NA	NA	NA	NA	FALSE	FALSE	NA	FALSE	NA	NA	NA	NA	NA	FALSE	FALSE	FALSE	FALSE	FALSE
NA	T21	Male	7.4	FALSE	TRUE	FALSE	FALSE	FALSE	FALSE	FALSE	FALSE	FALSE	FALSE	FALSE	FALSE	FALSE	FALSE	FALSE	FALSE	FALSE	FALSE	FALSE	FALSE	FALSE	FALSE	FALSE	FALSE	FALSE	TRUE	NA	FALSE	FALSE	FALSE	FALSE	FALSE	FALSE	FALSE
NA	T21	Female	16	FALSE	FALSE	FALSE	FALSE	FALSE	FALSE	FALSE	FALSE	FALSE	FALSE	FALSE	FALSE	FALSE	FALSE	FALSE	FALSE	FALSE	FALSE	FALSE	FALSE	FALSE	FALSE	FALSE	FALSE	FALSE	FALSE	NA	FALSE	FALSE	FALSE	FALSE	FALSE	FALSE	FALSE
NA	T21	Female	12.9	NA	FALSE	NA	FALSE	NA	FALSE	FALSE	FALSE	FALSE	FALSE	FALSE	FALSE	FALSE	FALSE	FALSE	NA	NA	NA	NA	NA	NA	FALSE	FALSE	FALSE	TRUE	TRUE	NA	FALSE	FALSE	FALSE	FALSE	FALSE	FALSE	FALSE
NA	T21	Male	15.7	FALSE	FALSE	FALSE	FALSE	FALSE	FALSE	FALSE	NA	FALSE	FALSE	FALSE	TRUE	FALSE	FALSE	FALSE	NA	FALSE	NA	NA	NA	FALSE	FALSE	NA	FALSE	NA	FALSE	NA	NA	NA	FALSE	FALSE	FALSE	FALSE	FALSE
NA	T21	Male	7.2	FALSE	NA	FALSE	NA	FALSE	NA	FALSE	NA	NA	FALSE	FALSE	TRUE	FALSE	FALSE	FALSE	NA	FALSE	NA	NA	NA	FALSE	FALSE	NA	FALSE	NA	NA	NA	NA	NA	FALSE	FALSE	FALSE	FALSE	FALSE
