# Supplementary material for: JAK inhibition decreases the autoimmune burden in Down syndrome
Source: eLife. 2024 Dec 31;13:RP99323. doi: 10.7554/eLife.99323 (PMC11687933; doi:10.7554/eLife.99323)
Supplement: Figure 1—source data 2. — (A) anti-thyroid peroxidase (TPO) reactivity; (B) anti-nuclear antigen (ANA) reactivity; (C) SciLifeLabs autoantigen peptide array data. [file elife-99323-fig1-data2.xlsx]

## Sheet: A. anti-TPO
LabID	Sample_type	Platform	antiTPO_reactivity
HTP0020A	Plasma	ECL assay	FALSE
HTP0115A	Plasma	ECL assay	FALSE
HTP0151A	Plasma	ECL assay	TRUE
HTP0203A	Plasma	ECL assay	FALSE
HTP0291A	Plasma	ECL assay	FALSE
HTP0295A	Plasma	ECL assay	FALSE
HTP0296A	Plasma	ECL assay	FALSE
HTP0298A	Plasma	ECL assay	FALSE
HTP0319A	Plasma	ECL assay	FALSE
HTP0325A	Plasma	ECL assay	TRUE
HTP0330A	Plasma	ECL assay	FALSE
HTP0332A	Plasma	ECL assay	FALSE
HTP0336A	Plasma	ECL assay	FALSE
HTP0342A	Plasma	ECL assay	FALSE
HTP0350A	Plasma	ECL assay	FALSE
HTP0351A	Plasma	ECL assay	FALSE
HTP0354A	Plasma	ECL assay	FALSE
HTP0357A	Plasma	ECL assay	FALSE
HTP0360A	Plasma	ECL assay	FALSE
HTP0364A	Plasma	ECL assay	FALSE
HTP0365A	Plasma	ECL assay	TRUE
HTP0370A	Plasma	ECL assay	TRUE
HTP0491A	Plasma	ECL assay	FALSE
HTP0494A	Plasma	ECL assay	FALSE
HTP0501A	Plasma	ECL assay	FALSE
HTP0507A	Plasma	ECL assay	FALSE
HTP0262A2	Plasma	ECL assay	TRUE
HTP0263A2	Plasma	ECL assay	FALSE
HTP0374A	Plasma	ECL assay	TRUE
HTP0379A	Plasma	ECL assay	TRUE
HTP0380A	Plasma	ECL assay	TRUE
HTP0381A	Plasma	ECL assay	TRUE
HTP0382A	Plasma	ECL assay	FALSE
HTP0383A	Plasma	ECL assay	TRUE
HTP0388A	Plasma	ECL assay	FALSE
HTP0390A	Plasma	ECL assay	FALSE
HTP0391A	Plasma	ECL assay	FALSE
HTP0393A	Plasma	ECL assay	TRUE
HTP0396A	Plasma	ECL assay	FALSE
HTP0397A	Plasma	ECL assay	FALSE
HTP0400A	Plasma	ECL assay	TRUE
HTP0402A	Plasma	ECL assay	FALSE
HTP0406A	Plasma	ECL assay	TRUE
HTP0408A	Plasma	ECL assay	FALSE
HTP0409A	Plasma	ECL assay	FALSE
HTP0410A	Plasma	ECL assay	TRUE
HTP0412A	Plasma	ECL assay	TRUE
HTP0418A	Plasma	ECL assay	FALSE
HTP0420A	Plasma	ECL assay	FALSE
HTP0421A	Plasma	ECL assay	TRUE
HTP0422A	Plasma	ECL assay	FALSE
HTP0437A	Plasma	ECL assay	TRUE
HTP0438A	Plasma	ECL assay	FALSE
HTP0440A	Plasma	ECL assay	TRUE
HTP0441A	Plasma	ECL assay	TRUE
HTP0445A	Plasma	ECL assay	FALSE
HTP0449A	Plasma	ECL assay	FALSE
HTP0450A	Plasma	ECL assay	FALSE
HTP0452A	Plasma	ECL assay	TRUE
HTP0453A	Plasma	ECL assay	FALSE
HTP0456A	Plasma	ECL assay	FALSE
HTP0458A	Plasma	ECL assay	TRUE
HTP0459A	Plasma	ECL assay	FALSE
HTP0461A	Plasma	ECL assay	FALSE
HTP0465A	Plasma	ECL assay	FALSE
HTP0469A	Plasma	ECL assay	TRUE
HTP0471A	Plasma	ECL assay	FALSE
HTP0473A	Plasma	ECL assay	TRUE
HTP0475A	Plasma	ECL assay	FALSE
HTP0478A	Plasma	ECL assay	FALSE
HTP0484A	Plasma	ECL assay	FALSE
HTP0303A	Plasma	ECL assay	TRUE
HTP0315A	Plasma	ECL assay	TRUE
HTP0326A	Plasma	ECL assay	TRUE
HTP0328A	Plasma	ECL assay	TRUE
HTP0340A	Plasma	ECL assay	FALSE
HTP0416A	Plasma	ECL assay	TRUE
HTP0510A	Plasma	ECL assay	TRUE
HTP0367A	Plasma	ECL assay	FALSE
HTP0368A	Plasma	ECL assay	FALSE
HTP0341A	Plasma	ECL assay	FALSE
HTP0386A	Plasma	ECL assay	FALSE
HTP0424A	Plasma	ECL assay	FALSE
HTP0261A2	Plasma	ECL assay	TRUE
HTP0426A	Plasma	ECL assay	FALSE
HTP0395A	Plasma	ECL assay	FALSE
HTP0448A	Plasma	ECL assay	TRUE
HTP0464A	Plasma	ECL assay	FALSE
HTP0514A	Plasma	ECL assay	FALSE
HTP0517A	Plasma	ECL assay	FALSE
HTP0405A	Plasma	ECL assay	TRUE
HTP0446A	Plasma	ECL assay	TRUE
HTP0428A	Plasma	ECL assay	TRUE
HTP0451A	Plasma	ECL assay	FALSE
HTP0003A	Plasma	ECL assay	TRUE
HTP0027A	Plasma	ECL assay	TRUE
HTP0030A	Plasma	ECL assay	TRUE
HTP0032A	Plasma	ECL assay	FALSE
HTP0045A	Plasma	ECL assay	FALSE
HTP0065A	Plasma	ECL assay	TRUE
HTP0093A	Plasma	ECL assay	FALSE
HTP0123A	Plasma	ECL assay	TRUE
HTP0119A	Plasma	ECL assay	FALSE
HTP0129A	Plasma	ECL assay	FALSE
HTP0139A	Plasma	ECL assay	TRUE
HTP0141A	Plasma	ECL assay	FALSE
HTP0204A	Plasma	ECL assay	FALSE
HTP0278A	Plasma	ECL assay	FALSE
HTP0293A	Plasma	ECL assay	FALSE
HTP0300A	Plasma	ECL assay	TRUE
HTP0306A	Plasma	ECL assay	TRUE
HTP0310A	Plasma	ECL assay	FALSE
HTP0327A	Plasma	ECL assay	FALSE
HTP0331A	Plasma	ECL assay	FALSE
HTP0321A	Plasma	ECL assay	TRUE
HTP0323A	Plasma	ECL assay	TRUE
HTP0339A	Plasma	ECL assay	TRUE
HTP0023A2	Plasma	ECL assay	TRUE
HTP0348A	Plasma	ECL assay	TRUE
HTP0337A	Plasma	ECL assay	FALSE
HTP0344A	Plasma	ECL assay	TRUE
HTP0195A2	Plasma	ECL assay	FALSE
HTP0012A2	Plasma	ECL assay	FALSE
HTP0345A	Plasma	ECL assay	TRUE
HTP0084A2	Plasma	ECL assay	TRUE
HTP0052A2	Plasma	ECL assay	FALSE
HTP0053A2	Plasma	ECL assay	TRUE
HTP0073A2	Plasma	ECL assay	FALSE
HTP0080A2	Plasma	ECL assay	TRUE
HTP0054A2	Plasma	ECL assay	FALSE
HTP0103A2	Plasma	ECL assay	TRUE
HTP0036A2	Plasma	ECL assay	TRUE
HTP0369A	Plasma	ECL assay	FALSE
HTP0066A2	Plasma	ECL assay	TRUE
HTP0490A	Plasma	ECL assay	FALSE
HTP0487A	Plasma	ECL assay	FALSE
HTP0485A	Plasma	ECL assay	FALSE
HTP0488A	Plasma	ECL assay	FALSE
HTP0373A	Plasma	ECL assay	FALSE
HTP0101A2	Plasma	ECL assay	TRUE
HTP0486A2	Plasma	ECL assay	FALSE
HTP0333A2	Plasma	ECL assay	TRUE
HTP0512A	Plasma	ECL assay	TRUE
HTP0005A3	Plasma	ECL assay	FALSE
HTP0025A3	Plasma	ECL assay	FALSE
HTP0318A3	Plasma	ECL assay	TRUE
HTP0112A3	Plasma	ECL assay	FALSE
HTP0515A	Plasma	ECL assay	FALSE
HTP0324A2	Plasma	ECL assay	FALSE
HTP0518A	Plasma	ECL assay	TRUE
HTP0516A	Plasma	ECL assay	FALSE
HTP0320A2	Plasma	ECL assay	TRUE
HTP0519A	Plasma	ECL assay	FALSE
HTP0334A2	Plasma	ECL assay	TRUE
HTP0329A2	Plasma	ECL assay	FALSE
HTP0335A2	Plasma	ECL assay	TRUE
HTP0525A	Plasma	ECL assay	TRUE
HTP0081A	Plasma	ECL assay	FALSE
HTP0050A3	Plasma	ECL assay	TRUE
HTP0017A4	Plasma	ECL assay	FALSE
HTP0531A	Plasma	ECL assay	FALSE
HTP0530A	Plasma	ECL assay	FALSE
HTP0259A2	Plasma	ECL assay	TRUE
HTP0439A2	Plasma	ECL assay	TRUE
HTP0070A3	Plasma	ECL assay	TRUE
HTP0532A	Plasma	ECL assay	TRUE
HTP0672A	Plasma	ECL assay	FALSE
HTP0175A2	Plasma	ECL assay	FALSE
HTP0534A	Plasma	ECL assay	FALSE
HTP0109A3	Plasma	ECL assay	FALSE
HTP0015A4	Plasma	ECL assay	TRUE
HTP0535A	Plasma	ECL assay	TRUE
HTP0116A2	Plasma	ECL assay	TRUE
HTP0312A2	Plasma	ECL assay	FALSE
HTP0301A3	Plasma	ECL assay	FALSE
HTP0676A	Plasma	ECL assay	TRUE
HTP0107A3	Plasma	ECL assay	FALSE
HTP0198A3	Plasma	ECL assay	TRUE
HTP0706A	Plasma	ECL assay	TRUE
HTP0207A4	Plasma	ECL assay	FALSE
HTP0708A	Plasma	ECL assay	FALSE
HTP0155A	Plasma	ECL assay	TRUE
HTP0154A	Plasma	ECL assay	TRUE
HTP0160A	Plasma	ECL assay	FALSE
HTP0179A	Plasma	ECL assay	FALSE
HTP0184A	Plasma	ECL assay	FALSE
HTP0176A	Plasma	ECL assay	FALSE
HTP0180A	Plasma	ECL assay	FALSE
HTP0186A	Plasma	ECL assay	FALSE
HTP0378A	Plasma	ECL assay	FALSE
HTP0387A	Plasma	ECL assay	TRUE
HTP0389A	Plasma	ECL assay	FALSE
HTP0385A	Plasma	ECL assay	FALSE
HTP0375A	Plasma	ECL assay	TRUE
HTP0384A	Plasma	ECL assay	TRUE
HTP0404A	Plasma	ECL assay	TRUE
HTP0398A	Plasma	ECL assay	FALSE
HTP0392A	Plasma	ECL assay	FALSE
HTP0394A	Plasma	ECL assay	TRUE
HTP0407A	Plasma	ECL assay	TRUE
HTP0403A	Plasma	ECL assay	TRUE
HTP0401A	Plasma	ECL assay	TRUE
HTP0414A	Plasma	ECL assay	FALSE
HTP0423A	Plasma	ECL assay	TRUE
HTP0419A	Plasma	ECL assay	TRUE
HTP0415A	Plasma	ECL assay	FALSE
HTP0411A	Plasma	ECL assay	FALSE
HTP0413A	Plasma	ECL assay	TRUE
HTP0425A	Plasma	ECL assay	FALSE
HTP0433A	Plasma	ECL assay	TRUE
HTP0436A	Plasma	ECL assay	TRUE
HTP0427A	Plasma	ECL assay	FALSE
HTP0432A	Plasma	ECL assay	FALSE
HTP0434A	Plasma	ECL assay	FALSE
HTP0430A	Plasma	ECL assay	FALSE
HTP0463A	Plasma	ECL assay	TRUE
HTP0460A	Plasma	ECL assay	TRUE
HTP0462A	Plasma	ECL assay	TRUE
HTP0454A	Plasma	ECL assay	TRUE
HTP0477A	Plasma	ECL assay	FALSE
HTP0470A	Plasma	ECL assay	FALSE
HTP0479A	Plasma	ECL assay	FALSE
HTP0467A	Plasma	ECL assay	TRUE
HTP0476A	Plasma	ECL assay	FALSE
HTP0480A	Plasma	ECL assay	TRUE
HTP0472A	Plasma	ECL assay	FALSE
HTP0474A	Plasma	ECL assay	TRUE
HTP0482A	Plasma	ECL assay	TRUE
HTP0483A	Plasma	ECL assay	TRUE
HTP0219A2	Plasma	ECL assay	TRUE
HTP0241A2	Plasma	ECL assay	FALSE
HTP0247A2	Plasma	ECL assay	TRUE
HTP0249A2	Plasma	ECL assay	TRUE
HTP0251A2	Plasma	ECL assay	TRUE
HTP0230A2	Plasma	ECL assay	FALSE
HTP0236A2	Plasma	ECL assay	FALSE
HTP0537A	Plasma	ECL assay	TRUE
HTP0243A3	Plasma	ECL assay	TRUE
HTP0548A	Plasma	ECL assay	FALSE
HTP0542A	Plasma	ECL assay	TRUE
HTP0547A	Plasma	ECL assay	FALSE
HTP0543A	Plasma	ECL assay	TRUE
HTP0545A	Plasma	ECL assay	TRUE
HTP0546A	Plasma	ECL assay	FALSE
HTP0213A3	Plasma	ECL assay	FALSE
HTP0540A	Plasma	ECL assay	TRUE
HTP0541A	Plasma	ECL assay	FALSE
HTP0544A	Plasma	ECL assay	TRUE
HTP0661A	Plasma	ECL assay	TRUE
HTP0670A	Plasma	ECL assay	FALSE
HTP0668A	Plasma	ECL assay	TRUE
HTP0667A	Plasma	ECL assay	FALSE
HTP0654A	Plasma	ECL assay	FALSE
HTP0658A	Plasma	ECL assay	TRUE
HTP0660A	Plasma	ECL assay	FALSE
HTP0435A2	Plasma	ECL assay	FALSE
HTP0666A	Plasma	ECL assay	TRUE
HTP0659A	Plasma	ECL assay	TRUE
HTP0211A3	Plasma	ECL assay	TRUE
HTP0539A	Plasma	ECL assay	TRUE
HTP0562A	Plasma	ECL assay	FALSE
HTP0549A	Plasma	ECL assay	FALSE
HTP0553A	Plasma	ECL assay	TRUE
HTP0565A	Plasma	ECL assay	FALSE
HTP0238A3	Plasma	ECL assay	TRUE
HTP0550A	Plasma	ECL assay	TRUE
HTP0552A	Plasma	ECL assay	TRUE
HTP0538A	Plasma	ECL assay	TRUE
HTP0442A2	Plasma	ECL assay	FALSE
HTP0226A3	Plasma	ECL assay	TRUE
HTP0556A	Plasma	ECL assay	TRUE
HTP0561A	Plasma	ECL assay	FALSE
HTP0566A	Plasma	ECL assay	FALSE
HTP0568A	Plasma	ECL assay	TRUE
HTP0571A	Plasma	ECL assay	TRUE
HTP0468A2	Plasma	ECL assay	TRUE
HTP0558A	Plasma	ECL assay	TRUE
HTP0554A	Plasma	ECL assay	FALSE
HTP0569A	Plasma	ECL assay	TRUE
HTP0431A2	Plasma	ECL assay	FALSE
HTP0572A	Plasma	ECL assay	TRUE
HTP0592A	Plasma	ECL assay	FALSE
HTP0590A	Plasma	ECL assay	TRUE
HTP0570A	Plasma	ECL assay	TRUE
HTP0594A	Plasma	ECL assay	FALSE
HTP0578A	Plasma	ECL assay	FALSE
HTP0574A	Plasma	ECL assay	FALSE
HTP0560A	Plasma	ECL assay	FALSE
HTP0585A	Plasma	ECL assay	TRUE
HTP0589A	Plasma	ECL assay	FALSE
HTP0577A	Plasma	ECL assay	FALSE
HTP0575A	Plasma	ECL assay	TRUE
HTP0563A	Plasma	ECL assay	FALSE
HTP0593A	Plasma	ECL assay	TRUE
HTP0598A	Plasma	ECL assay	FALSE
HTP0579A	Plasma	ECL assay	FALSE
HTP0591A	Plasma	ECL assay	TRUE
HTP0586A	Plasma	ECL assay	FALSE
HTP0583A	Plasma	ECL assay	FALSE
HTP0581A	Plasma	ECL assay	TRUE
HTP0600A	Plasma	ECL assay	FALSE
HTP0277A3	Plasma	ECL assay	FALSE
HTP0587A	Plasma	ECL assay	FALSE
HTP0611A	Plasma	ECL assay	TRUE
HTP0564A	Plasma	ECL assay	TRUE
HTP0597A	Plasma	ECL assay	FALSE
HTP0609A	Plasma	ECL assay	FALSE
HTP0580A	Plasma	ECL assay	TRUE
HTP0603A	Plasma	ECL assay	FALSE
HTP0606A	Plasma	ECL assay	TRUE
HTP0610A	Plasma	ECL assay	FALSE
HTP0584A	Plasma	ECL assay	FALSE
HTP0602A	Plasma	ECL assay	TRUE
HTP0607A	Plasma	ECL assay	TRUE
HTP0616A	Plasma	ECL assay	FALSE
HTP0254A2	Plasma	ECL assay	TRUE
HTP0608A	Plasma	ECL assay	FALSE
HTP0596A	Plasma	ECL assay	TRUE
HTP0612A	Plasma	ECL assay	FALSE
HTP0604A	Plasma	ECL assay	TRUE
HTP0613A	Plasma	ECL assay	FALSE
HTP0632A	Plasma	ECL assay	TRUE
HTP0601A	Plasma	ECL assay	FALSE
HTP0443A2	Plasma	ECL assay	FALSE
HTP0626A	Plasma	ECL assay	TRUE
HTP0599A	Plasma	ECL assay	TRUE
HTP0605A	Plasma	ECL assay	FALSE
HTP0619A	Plasma	ECL assay	TRUE
HTP0633A	Plasma	ECL assay	TRUE
HTP0622A	Plasma	ECL assay	FALSE
HTP0617A	Plasma	ECL assay	TRUE
HTP0621A	Plasma	ECL assay	TRUE
HTP0646A	Plasma	ECL assay	TRUE
HTP0630A	Plasma	ECL assay	FALSE
HTP0627A	Plasma	ECL assay	TRUE
HTP0647A	Plasma	ECL assay	FALSE
HTP0399A2	Plasma	ECL assay	TRUE
HTP0636A	Plasma	ECL assay	TRUE
HTP0629A	Plasma	ECL assay	FALSE
HTP0618A	Plasma	ECL assay	FALSE
HTP0634A	Plasma	ECL assay	FALSE
HTP0620A	Plasma	ECL assay	TRUE
HTP0624A	Plasma	ECL assay	FALSE
HTP0652A	Plasma	ECL assay	TRUE
HTP0625A	Plasma	ECL assay	TRUE
HTP0635A	Plasma	ECL assay	FALSE
HTP0631A	Plasma	ECL assay	TRUE
HTP0623A	Plasma	ECL assay	FALSE
HTP0650A	Plasma	ECL assay	TRUE
HTP0643A	Plasma	ECL assay	FALSE
HTP0651A	Plasma	ECL assay	TRUE
HTP0664A	Plasma	ECL assay	TRUE
HTP0644A	Plasma	ECL assay	TRUE
HTP0642A	Plasma	ECL assay	FALSE
HTP0638A	Plasma	ECL assay	TRUE
HTP0665A	Plasma	ECL assay	TRUE
HTP0640A	Plasma	ECL assay	FALSE
HTP0645A	Plasma	ECL assay	FALSE
HTP0662A	Plasma	ECL assay	FALSE
HTP0663A	Plasma	ECL assay	FALSE
HTP0657A	Plasma	ECL assay	FALSE
HTP0641A	Plasma	ECL assay	FALSE
HTP0639A	Plasma	ECL assay	FALSE
HTP0637A	Plasma	ECL assay	TRUE
HTP0588A	Plasma	ECL assay	FALSE
HTP0223A	Plasma	ECL assay	TRUE
HTP0221A	Plasma	ECL assay	FALSE
HTP0227A	Plasma	ECL assay	TRUE
HTP0217A	Plasma	ECL assay	TRUE
HTP0215A	Plasma	ECL assay	FALSE
HTP0220A	Plasma	ECL assay	FALSE
HTP0224A	Plasma	ECL assay	FALSE
HTP0218A	Plasma	ECL assay	TRUE
HTP0212A	Plasma	ECL assay	FALSE
HTP0222A	Plasma	ECL assay	TRUE
HTP0240A	Plasma	ECL assay	TRUE
HTP0235A	Plasma	ECL assay	TRUE
HTP0229A	Plasma	ECL assay	FALSE
HTP0228A	Plasma	ECL assay	FALSE
HTP0232A	Plasma	ECL assay	FALSE
HTP0234A	Plasma	ECL assay	TRUE
HTP0239A	Plasma	ECL assay	FALSE
HTP0233A	Plasma	ECL assay	TRUE
HTP0237A	Plasma	ECL assay	FALSE
HTP0244A	Plasma	ECL assay	FALSE
HTP0256A	Plasma	ECL assay	FALSE
HTP0245A	Plasma	ECL assay	FALSE
HTP0250A	Plasma	ECL assay	TRUE
HTP0257A	Plasma	ECL assay	TRUE
HTP0253A	Plasma	ECL assay	TRUE
HTP0258A	Plasma	ECL assay	FALSE
HTP0260A	Plasma	ECL assay	FALSE
HTP0270A	Plasma	ECL assay	TRUE
HTP0265A	Plasma	ECL assay	FALSE
HTP0268A	Plasma	ECL assay	FALSE
HTP0273A	Plasma	ECL assay	TRUE
HTP0274A	Plasma	ECL assay	FALSE
HTP0266A	Plasma	ECL assay	FALSE
HTP0269A	Plasma	ECL assay	TRUE
HTP0276A	Plasma	ECL assay	TRUE
HTP0264A	Plasma	ECL assay	FALSE
HTP0267A	Plasma	ECL assay	FALSE
HTP0272A	Plasma	ECL assay	FALSE
HTP0275A	Plasma	ECL assay	FALSE

## Sheet: B. ANA
LabID	Sample_type	Platform	ANA_reactivity
HTP0332A	Plasma	ELISA	TRUE
HTP0312A2	Plasma	ELISA	TRUE
HTP0118B	Plasma	ELISA	FALSE
HTP0125B	Plasma	ELISA	TRUE
HTP0119A	Plasma	ELISA	TRUE
HTP0123A	Plasma	ELISA	TRUE
HTP0147B	Plasma	ELISA	FALSE
HTP0149B	Plasma	ELISA	TRUE
HTP0146B	Plasma	ELISA	FALSE
HTP0205B	Plasma	ELISA	FALSE
HTP0202B	Plasma	ELISA	FALSE
HTP0204A	Plasma	ELISA	TRUE
HTP0208B	Plasma	ELISA	FALSE
HTP0287B	Plasma	ELISA	FALSE
HTP0293A	Plasma	ELISA	TRUE
HTP0288B	Plasma	ELISA	FALSE
HTP0290B	Plasma	ELISA	FALSE
HTP0294B	Plasma	ELISA	FALSE
HTP0206B	Plasma	ELISA	FALSE
HTP0289B	Plasma	ELISA	FALSE
HTP0316B	Plasma	ELISA	FALSE
HTP0298A	Plasma	ELISA	FALSE
HTP0314B	Plasma	ELISA	FALSE
HTP0315A	Plasma	ELISA	TRUE
HTP0296A	Plasma	ELISA	TRUE
HTP0303A	Plasma	ELISA	FALSE
HTP0295A	Plasma	ELISA	FALSE
HTP0307B	Plasma	ELISA	FALSE
HTP0306A	Plasma	ELISA	FALSE
HTP0300A	Plasma	ELISA	TRUE
HTP0319A	Plasma	ELISA	TRUE
HTP0326A	Plasma	ELISA	TRUE
HTP0328A	Plasma	ELISA	TRUE
HTP0322B	Plasma	ELISA	FALSE
HTP0331A	Plasma	ELISA	TRUE
HTP0023A2	Plasma	ELISA	FALSE
HTP0346B	Plasma	ELISA	FALSE
HTP0337A	Plasma	ELISA	FALSE
HTP0338B	Plasma	ELISA	FALSE
HTP0343B	Plasma	ELISA	FALSE
HTP0012A2	Plasma	ELISA	FALSE
HTP0340A	Plasma	ELISA	TRUE
HTP0347B	Plasma	ELISA	FALSE
HTP0345A	Plasma	ELISA	FALSE
HTP0084A2	Plasma	ELISA	FALSE
HTP0348A	Plasma	ELISA	TRUE
HTP0085B2	Plasma	ELISA	FALSE
HTP0352B	Plasma	ELISA	FALSE
HTP0055B2	Plasma	ELISA	FALSE
HTP0044B2	Plasma	ELISA	FALSE
HTP0351A	Plasma	ELISA	FALSE
HTP0052A2	Plasma	ELISA	TRUE
HTP0043B2	Plasma	ELISA	FALSE
HTP0349B	Plasma	ELISA	FALSE
HTP0057B2	Plasma	ELISA	FALSE
HTP0001B2	Plasma	ELISA	FALSE
HTP0058B2	Plasma	ELISA	FALSE
HTP0053A2	Plasma	ELISA	TRUE
HTP0042B2	Plasma	ELISA	FALSE
HTP0034B3	Plasma	ELISA	FALSE
HTP0079B2	Plasma	ELISA	FALSE
HTP0018B3	Plasma	ELISA	FALSE
HTP0095B2	Plasma	ELISA	FALSE
HTP0047B2	Plasma	ELISA	TRUE
HTP0048B2	Plasma	ELISA	FALSE
HTP0090B2	Plasma	ELISA	FALSE
HTP0080A2	Plasma	ELISA	FALSE
HTP0054A2	Plasma	ELISA	FALSE
HTP0059B2	Plasma	ELISA	FALSE
HTP0073A2	Plasma	ELISA	FALSE
HTP0092B2	Plasma	ELISA	FALSE
HTP0077B2	Plasma	ELISA	FALSE
HTP0078B2	Plasma	ELISA	FALSE
HTP0104B2	Plasma	ELISA	FALSE
HTP0100B2	Plasma	ELISA	TRUE
HTP0096B2	Plasma	ELISA	FALSE
HTP0019B2	Plasma	ELISA	FALSE
HTP0036A2	Plasma	ELISA	TRUE
HTP0487A2	Plasma	ELISA	TRUE
HTP0098B2	Plasma	ELISA	FALSE
HTP0066A2	Plasma	ELISA	TRUE
HTP0485A2	Plasma	ELISA	FALSE
HTP0373A	Plasma	ELISA	TRUE
HTP0101A2	Plasma	ELISA	TRUE
HTP0126B2	Plasma	ELISA	FALSE
HTP0506B	Plasma	ELISA	FALSE
HTP0498B	Plasma	ELISA	FALSE
HTP0502B	Plasma	ELISA	FALSE
HTP0497B	Plasma	ELISA	FALSE
HTP0026B2	Plasma	ELISA	FALSE
HTP0005A3	Plasma	ELISA	TRUE
HTP0512A	Plasma	ELISA	TRUE
HTP0025A3	Plasma	ELISA	FALSE
HTP0318A3	Plasma	ELISA	FALSE
HTP0040B3	Plasma	ELISA	FALSE
HTP0112A3	Plasma	ELISA	TRUE
HTP0329A2	Plasma	ELISA	TRUE
HTP0515A	Plasma	ELISA	TRUE
HTP0324A2	Plasma	ELISA	TRUE
HTP0516A	Plasma	ELISA	TRUE
HTP0334A2	Plasma	ELISA	TRUE
HTP0148B2	Plasma	ELISA	FALSE
HTP0320A2	Plasma	ELISA	TRUE
HTP0523B	Plasma	ELISA	FALSE
HTP0051B2	Plasma	ELISA	TRUE
HTP0067B2	Plasma	ELISA	FALSE
HTP0333A3	Plasma	ELISA	FALSE
HTP0050A3	Plasma	ELISA	FALSE
HTP0524B	Plasma	ELISA	FALSE
HTP0335A2	Plasma	ELISA	TRUE
HTP0361B2	Plasma	ELISA	FALSE
HTP0022B2	Plasma	ELISA	FALSE
HTP0017A4	Plasma	ELISA	TRUE
HTP0525A	Plasma	ELISA	TRUE
HTP0527B	Plasma	ELISA	FALSE
HTP0259A2	Plasma	ELISA	TRUE
HTP0035B3	Plasma	ELISA	FALSE
HTP0070A3	Plasma	ELISA	FALSE
HTP0111B2	Plasma	ELISA	FALSE
HTP0439A2	Plasma	ELISA	TRUE
HTP0105B3	Plasma	ELISA	FALSE
HTP0062B2	Plasma	ELISA	FALSE
HTP0535A	Plasma	ELISA	TRUE
HTP0087B2	Plasma	ELISA	FALSE
HTP0508B2	Plasma	ELISA	FALSE
HTP0109A3	Plasma	ELISA	FALSE
HTP0015A4	Plasma	ELISA	TRUE
HTP0116A2	Plasma	ELISA	TRUE
HTP0301A3	Plasma	ELISA	FALSE
HTP0676A	Plasma	ELISA	FALSE
HTP0677B	Plasma	ELISA	FALSE
HTP0107A3	Plasma	ELISA	TRUE
HTP0198A3	Plasma	ELISA	FALSE
HTP0706A	Plasma	ELISA	TRUE
HTP0207A4	Plasma	ELISA	FALSE
HTP0708A	Plasma	ELISA	TRUE
HTP0433A2	Plasma	ELISA	FALSE
HTP0243A4	Plasma	ELISA	FALSE
HTP0531A2	Plasma	ELISA	FALSE
HTP0384A	Plasma	ELISA	FALSE
HTP0404A	Plasma	ELISA	TRUE
HTP0396A	Plasma	ELISA	TRUE
HTP0398A	Plasma	ELISA	TRUE
HTP0403A	Plasma	ELISA	TRUE
HTP0429B	Plasma	ELISA	FALSE
HTP0438A	Plasma	ELISA	FALSE
HTP0440A	Plasma	ELISA	TRUE
HTP0461A	Plasma	ELISA	TRUE
HTP0463A	Plasma	ELISA	TRUE
HTP0452A	Plasma	ELISA	TRUE
HTP0460A	Plasma	ELISA	FALSE
HTP0467A	Plasma	ELISA	TRUE
HTP0216B2	Plasma	ELISA	FALSE
HTP0341A2	Plasma	ELISA	FALSE
HTP0219A2	Plasma	ELISA	TRUE
HTP0241A2	Plasma	ELISA	TRUE
HTP0262A2	Plasma	ELISA	TRUE
HTP0236A2	Plasma	ELISA	FALSE
HTP0230A2	Plasma	ELISA	TRUE
HTP0249A3	Plasma	ELISA	TRUE
HTP0546A	Plasma	ELISA	FALSE
HTP0542A	Plasma	ELISA	TRUE
HTP0547A	Plasma	ELISA	FALSE
HTP0242B3	Plasma	ELISA	FALSE
HTP0543A	Plasma	ELISA	TRUE
HTP0545A	Plasma	ELISA	FALSE
HTP0537A	Plasma	ELISA	TRUE
HTP0392A2	Plasma	ELISA	FALSE
HTP0544A	Plasma	ELISA	TRUE
HTP0251A3	Plasma	ELISA	TRUE
HTP0668A	Plasma	ELISA	TRUE
HTP0667A	Plasma	ELISA	TRUE
HTP0435A2	Plasma	ELISA	TRUE
HTP0654A	Plasma	ELISA	TRUE
HTP0660A	Plasma	ELISA	TRUE
HTP0666A	Plasma	ELISA	FALSE
HTP0669B	Plasma	ELISA	FALSE
HTP0653B	Plasma	ELISA	FALSE
HTP0659A	Plasma	ELISA	TRUE
HTP0661A	Plasma	ELISA	TRUE
HTP0549A	Plasma	ELISA	TRUE
HTP0555B	Plasma	ELISA	FALSE
HTP0238A3	Plasma	ELISA	TRUE
HTP0553A	Plasma	ELISA	TRUE
HTP0565A	Plasma	ELISA	TRUE
HTP0550A	Plasma	ELISA	TRUE
HTP0211A3	Plasma	ELISA	TRUE
HTP0539A	Plasma	ELISA	TRUE
HTP0552A	Plasma	ELISA	TRUE
HTP0538A	Plasma	ELISA	TRUE
HTP0561A	Plasma	ELISA	TRUE
HTP0566A	Plasma	ELISA	TRUE
HTP0567B	Plasma	ELISA	FALSE
HTP0568A	Plasma	ELISA	TRUE
HTP0571A	Plasma	ELISA	FALSE
HTP0468A2	Plasma	ELISA	TRUE
HTP0554A	Plasma	ELISA	TRUE
HTP0226A3	Plasma	ELISA	TRUE
HTP0569A	Plasma	ELISA	TRUE
HTP0573B	Plasma	ELISA	FALSE
HTP0431A2	Plasma	ELISA	TRUE
HTP0592A	Plasma	ELISA	TRUE
HTP0578A	Plasma	ELISA	TRUE
HTP0574A	Plasma	ELISA	TRUE
HTP0570A	Plasma	ELISA	TRUE
HTP0576B	Plasma	ELISA	FALSE
HTP0585A	Plasma	ELISA	TRUE
HTP0589A	Plasma	ELISA	FALSE
HTP0577A	Plasma	ELISA	TRUE
HTP0575A	Plasma	ELISA	TRUE
HTP0572A	Plasma	ELISA	TRUE
HTP0557B	Plasma	ELISA	FALSE
HTP0593A	Plasma	ELISA	TRUE
HTP0591A	Plasma	ELISA	TRUE
HTP0586A	Plasma	ELISA	TRUE
HTP0277A3	Plasma	ELISA	FALSE
HTP0581A	Plasma	ELISA	FALSE
HTP0600A	Plasma	ELISA	FALSE
HTP0379A2	Plasma	ELISA	FALSE
HTP0582B	Plasma	ELISA	FALSE
HTP0611A	Plasma	ELISA	TRUE
HTP0564A	Plasma	ELISA	TRUE
HTP0597A	Plasma	ELISA	TRUE
HTP0598A	Plasma	ELISA	FALSE
HTP0610A	Plasma	ELISA	FALSE
HTP0584A	Plasma	ELISA	TRUE
HTP0615B	Plasma	ELISA	FALSE
HTP0602A	Plasma	ELISA	TRUE
HTP0607A	Plasma	ELISA	TRUE
HTP0616A	Plasma	ELISA	FALSE
HTP0254A2	Plasma	ELISA	FALSE
HTP0608A	Plasma	ELISA	TRUE
HTP0596A	Plasma	ELISA	TRUE
HTP0595B	Plasma	ELISA	FALSE
HTP0604A	Plasma	ELISA	TRUE
HTP0632A	Plasma	ELISA	TRUE
HTP0626A	Plasma	ELISA	TRUE
HTP0599A	Plasma	ELISA	TRUE
HTP0605A	Plasma	ELISA	FALSE
HTP0619A	Plasma	ELISA	TRUE
HTP0648B	Plasma	ELISA	FALSE
HTP0633A	Plasma	ELISA	TRUE
HTP0447B2	Plasma	ELISA	FALSE
HTP0617A	Plasma	ELISA	TRUE
HTP0621A	Plasma	ELISA	FALSE
HTP0646A	Plasma	ELISA	TRUE
HTP0630A	Plasma	ELISA	FALSE
HTP0443A2	Plasma	ELISA	TRUE
HTP0627A	Plasma	ELISA	TRUE
HTP0618A	Plasma	ELISA	TRUE
HTP0634A	Plasma	ELISA	TRUE
HTP0620A	Plasma	ELISA	TRUE
HTP0624A	Plasma	ELISA	FALSE
HTP0649B	Plasma	ELISA	FALSE
HTP0652A	Plasma	ELISA	FALSE
HTP0625A	Plasma	ELISA	TRUE
HTP0647A	Plasma	ELISA	FALSE
HTP0631A	Plasma	ELISA	TRUE
HTP0623A	Plasma	ELISA	FALSE
HTP0650A	Plasma	ELISA	TRUE
HTP0643A	Plasma	ELISA	TRUE
HTP0651A	Plasma	ELISA	FALSE
HTP0664A	Plasma	ELISA	TRUE
HTP0665A	Plasma	ELISA	TRUE
HTP0644A	Plasma	ELISA	TRUE
HTP0642A	Plasma	ELISA	TRUE
HTP0638A	Plasma	ELISA	TRUE
HTP0645A	Plasma	ELISA	FALSE
HTP0662A	Plasma	ELISA	TRUE
HTP0663A	Plasma	ELISA	FALSE
HTP0657A	Plasma	ELISA	FALSE
HTP0641A	Plasma	ELISA	TRUE
HTP0639A	Plasma	ELISA	FALSE
HTP0637A	Plasma	ELISA	TRUE
HTP0588A	Plasma	ELISA	TRUE
HTP0213A4	Plasma	ELISA	TRUE
HTP0459A2	Plasma	ELISA	FALSE
HTP0540A2	Plasma	ELISA	TRUE
HTP0450A2	Plasma	ELISA	TRUE
HTP0390A2	Plasma	ELISA	TRUE
HTP0451A2	Plasma	ELISA	TRUE
HTP0426A2	Plasma	ELISA	FALSE
HTP0382A2	Plasma	ELISA	FALSE
HTP0563A2	Plasma	ELISA	TRUE
HTP0027A	Plasma	ELISA	FALSE
HTP0045A	Plasma	ELISA	FALSE
HTP0065A	Plasma	ELISA	FALSE
HTP0291A	Plasma	ELISA	TRUE
HTP0883A	Plasma	ELISA	FALSE
HTP0151A3	Plasma	ELISA	FALSE
HTP0532A	Plasma	ELISA	FALSE
HTP0719A	Plasma	ELISA	FALSE
HTP0721A	Plasma	ELISA	FALSE
HTP0729A	Plasma	ELISA	FALSE
HTP0755A	Plasma	ELISA	FALSE
HTP0781A	Plasma	ELISA	FALSE
HTP0710A2	Plasma	ELISA	TRUE
HTP0809A	Plasma	ELISA	FALSE
HTP0801A	Plasma	ELISA	FALSE
HTP0812A	Plasma	ELISA	FALSE
HTP0746A2	Plasma	ELISA	FALSE
HTP0859A	Plasma	ELISA	FALSE
HTP0861A	Plasma	ELISA	FALSE
HTP0862A	Plasma	ELISA	FALSE
HTP0864A	Plasma	ELISA	TRUE
HTP0866A	Plasma	ELISA	FALSE
HTP0876A	Plasma	ELISA	FALSE
HTP0959A	Plasma	ELISA	FALSE
HTP0490A4	Plasma	ELISA	FALSE
HTP0715A	Plasma	ELISA	FALSE
HTP0712A	Plasma	ELISA	FALSE
HTP0714A	Plasma	ELISA	FALSE
HTP0344A	Plasma	ELISA	TRUE
HTP0212A	Plasma	ELISA	FALSE
HTP0215A	Plasma	ELISA	FALSE
HTP0221A	Plasma	ELISA	TRUE
HTP0224A	Plasma	ELISA	TRUE
HTP0233A	Plasma	ELISA	FALSE
HTP0235A	Plasma	ELISA	TRUE
HTP0240A	Plasma	ELISA	TRUE
HTP0258A	Plasma	ELISA	FALSE
HTP0264A	Plasma	ELISA	FALSE
HTP0266A	Plasma	ELISA	FALSE
HTP0269A	Plasma	ELISA	FALSE
HTP0273A	Plasma	ELISA	TRUE
HTP0275A	Plasma	ELISA	FALSE
HTP0369A	Plasma	ELISA	FALSE
HTP0399A	Plasma	ELISA	TRUE
HTP0558A	Plasma	ELISA	TRUE
HTP0556A2	Plasma	ELISA	TRUE
HTP0510A2	Plasma	ELISA	TRUE
HTP0693A	Plasma	ELISA	TRUE
HTP0702A	Plasma	ELISA	FALSE
HTP0911A	Plasma	ELISA	TRUE
HTP0817A	Plasma	ELISA	FALSE
HTP0827A	Plasma	ELISA	TRUE
HTP0847A	Plasma	ELISA	FALSE
HTP0854A	Plasma	ELISA	TRUE
HTP0853A	Plasma	ELISA	FALSE
HTP0852A	Plasma	ELISA	TRUE
HTP0850A	Plasma	ELISA	TRUE
HTP0846A	Plasma	ELISA	FALSE
HTP0845A	Plasma	ELISA	TRUE
HTP0844A	Plasma	ELISA	TRUE
HTP0843A	Plasma	ELISA	FALSE
HTP0834A	Plasma	ELISA	FALSE
HTP0839A	Plasma	ELISA	FALSE
HTP0838A	Plasma	ELISA	FALSE
HTP0835A	Plasma	ELISA	TRUE
HTP0832A	Plasma	ELISA	TRUE
HTP0831A	Plasma	ELISA	FALSE
HTP0828A	Plasma	ELISA	TRUE
HTP0825A	Plasma	ELISA	FALSE
HTP0821A	Plasma	ELISA	FALSE
HTP0820A	Plasma	ELISA	FALSE
HTP0816A	Plasma	ELISA	FALSE
HTP0679A2	Plasma	ELISA	FALSE
HTP0899A	Plasma	ELISA	FALSE
HTP0902A	Plasma	ELISA	FALSE
HTP0900A	Plasma	ELISA	FALSE
HTP0898A	Plasma	ELISA	TRUE
HTP0897A	Plasma	ELISA	TRUE
HTP0896A	Plasma	ELISA	FALSE
HTP0895A	Plasma	ELISA	TRUE
HTP0887A	Plasma	ELISA	TRUE
HTP0888A	Plasma	ELISA	TRUE
HTP0889A	Plasma	ELISA	TRUE
HTP0891A	Plasma	ELISA	TRUE
HTP0893A	Plasma	ELISA	TRUE
HTP0890A	Plasma	ELISA	TRUE
HTP0886A	Plasma	ELISA	FALSE
HTP0885A	Plasma	ELISA	TRUE
HTP0881A	Plasma	ELISA	TRUE
HTP0880A	Plasma	ELISA	TRUE
HTP0879A	Plasma	ELISA	TRUE
HTP0873A	Plasma	ELISA	TRUE
HTP0865A	Plasma	ELISA	TRUE
HTP0863A	Plasma	ELISA	TRUE
HTP0858A	Plasma	ELISA	TRUE
HTP0856A	Plasma	ELISA	TRUE
HTP0855A	Plasma	ELISA	TRUE
HTP0813A	Plasma	ELISA	TRUE
HTP0810A	Plasma	ELISA	FALSE
HTP0640A	Plasma	ELISA	TRUE
HTP0921A	Plasma	ELISA	TRUE
HTP0032A	Plasma	ELISA	TRUE
HTP0783A	Plasma	ELISA	TRUE
HTP0751A	Plasma	ELISA	TRUE
HTP0738A	Plasma	ELISA	TRUE
HTP0737A	Plasma	ELISA	FALSE
HTP0731A	Plasma	ELISA	TRUE
HTP0730A	Plasma	ELISA	TRUE

## Sheet: C. Autoantigen array
LabID	Sample_type	Platform	Antigen	Amino_acids	Gene_symbol	Uniprot	Units	Value	90th_percentile_D21	Antigen_reactivity
HTP0092B	Plasma	SciLifeLab peptide array	A2M_HPRR350039	SVLLMKPDAELSASSVYNLLPEKDLTGFPGPLNDQDDEDCINRHNVYINGITYTPVSSTNEKDMYSFLEDMGLKAFTNSKIRKPKMCPQLQQYEMHGPEGLRVGFYESDVMGRGHARLVHVEEPHTETVRKYFPETWIWDLVVVNS	A2M	P01023	MAD	19	3	TRUE
HTP0092B	Plasma	SciLifeLab peptide array	AARS_HPRR3160056	DRASKADVQKRVLEKTKQFIDSNPNQPLVILEMESGASAKALNEALKLFKMHSPQTSAMLFTVDNEAGKITCLCQVPQNAANRGLKASEWVQQVSGLMDGKGGGKD	AARS	P49588	MAD	0	7.1	FALSE
HTP0092B	Plasma	SciLifeLab peptide array	AARS_HPRR3160058	EFTVKNAQVRGGYVLHIGTIYGDLKVGDQVWLFIDEPRRRPIMSNHTATHILNFALRSVLGEADQKGSLVAPDRLRFDFTAKGAMSTQQIKKAEEIANEMIEAAKAVYTQDCP	AARS	P49588	MAD	1	1	FALSE
HTP0092B	Plasma	SciLifeLab peptide array	ABCC8_HPRR2060003	DHLGKENDVFQPKTQFLGVYFVSSQ	ABCC8	Q09428	MAD	0	2	FALSE
HTP0092B	Plasma	SciLifeLab peptide array	ABCC8_HPRR4160072	VSVQKLSEFLSSAEIREEQCAPHEPTPQGPASKYQAVPLRVVNRKRPAREDCRGLTGPLQSLVPSADGDADNCCVQIMGGYFTWTPD	ABCC8	Q09428	MAD	0	1.1	FALSE
HTP0092B	Plasma	SciLifeLab peptide array	ACHE_HPRR2440120	RGIRLKTPGGPVSAFLGIPFAEPPMGPRRFLPPEPKQPWSGVVDATTFQSVCYQYVDTLYPGFEGTEMWNPNRE	ACHE	P22303	MAD	0	1.1	FALSE
HTP0092B	Plasma	SciLifeLab peptide array	ACHE_HPRR3870163	TVGMGEARRRATQLAHLVGCPPGGTGGNDTELVACLRTRPAQVLVNHEWHVLPQESVFRFSFVPVVDGDFLSDTPEALINAGDFHG	ACHE	P22303	MAD	1	1	FALSE
HTP0092B	Plasma	SciLifeLab peptide array	ACTA2*_HPRR3230094	PKANREKMTQIMFETFNTPAMYVAIQ	ACTA2*	P62736;P63267;A5A3E0;P0CG38;P0CG39;Q6S8J3;P63261;P60709;P68032;P68133;Q562R1	MAD	0	8	FALSE
HTP0092B	Plasma	SciLifeLab peptide array	ACTA2*_HPRR3230096	MVGMGQKDSYVGDEAQSKRGILTLKYPIEHGIVTNWD	ACTA2*	P62736;P63267;A5A3E0;P0CG38;P0CG39;Q6S8J3;P63261;P60709;P68032;P68133;Q562R1	MAD	-1	0	FALSE
HTP0092B	Plasma	SciLifeLab peptide array	AIMP1_HPRR2310067	CNLKPAKMRGVLSQAMVMCASSPEKIEILAPPNGSVPGDRITFDAFPGEPDKELNPKKKIWEQIQPDLHTNDECVATYKGVPFEVKGKGVCRAQTMSNSGI	AIMP1	Q12904	MAD	-1	1	FALSE
HTP0092B	Plasma	SciLifeLab peptide array	AIMP1_HPRR2310068	MANNDAVLKRLEQKGAEADQIIEYLKQQVSLLKEKAILQATLREEKKLRVENAKLKKEIEELKQELIQAEIQNGV	AIMP1	Q12904	MAD	0	67.3	FALSE
HTP0092B	Plasma	SciLifeLab peptide array	AIMP1_HPRR2310069	TPLHANSMVSENVIQSTAVTTVSSGTKEQIKGGTGDEKKAKEKIEKKGEKKEKKQQSIAGSADSKPIDVSRLDLRIGCIITARKHPDADSLY	AIMP1	Q12904	MAD	1	38	FALSE
HTP0092B	Plasma	SciLifeLab peptide array	AIMP2_HPRR2440262	APLRVELPTCMYRLPNVHGRSYGPAPGAGHVQEESNLSLQALESRQDDILKRLYELKAAVDGLSKMIQTPDADLDVTNIIQADEPTTLTTNAL	AIMP2	Q13155	MAD	-1	2.2	FALSE
HTP0092B	Plasma	SciLifeLab peptide array	AIMP2_HPRR2440263	SVLGKDYGALKDIVINANPASPPLSLLVLHRLLCEHFRVLSTVHTHSSVKSVPENLLKCFGEQNKKQPRQDYQLGFTLIWKNVPKTQ	AIMP2	Q13155	MAD	-1	-0.9	FALSE
HTP0092B	Plasma	SciLifeLab peptide array	AIMP2_HPRR2440264	IARFLFSLFGQKHNAVNATLIDSWVDIAIFQLKEGSSKEKAAVFRSMNSALGKSPWLAGNELTVADVVLWSVLQQIGGCSVTVPANVQRWMRSCENLAPFNTALKLLK	AIMP2	Q13155	MAD	0	2	FALSE
HTP0092B	Plasma	SciLifeLab peptide array	ALOX12_HPRR1960006	YAWVPNAPCTMRMPPPTTKEDVTMATVMGSLPDVRQACLQMAISWHLSRRQPDMVPLGHHKEKYFSGPKPKAVLNQFRTDLEKLEKEITARNEQLDWPYEY	ALOX12	P18054	MAD	0	1	FALSE
HTP0092B	Plasma	SciLifeLab peptide array	ALOX12_HPRR1960007	PGDNALDMFQKHREKELKDRQQIYCWATWKEGLPLTIAADRKDDLPPNMRFHEEKRLDFEWTLKAGALEMALKRVYTLLSSWNCLEDFDQIFWGQKSALAEKVRQCWQDDELFSYQFLNGANP	ALOX12	P18054	MAD	-2	0	FALSE
HTP0092B	Plasma	SciLifeLab peptide array	ANO2_HPRR3070034	PTDISDQIKKEKSLLVDFFLKEEHEKLKLMDEPALRSPGGGDRSRSRAASSAPSGQSQLGSMMSSGSQHTNV	ANO2	Q9NQ90	MAD	2	8.2	FALSE
HTP0092B	Plasma	SciLifeLab peptide array	ANO2_HPRR3070036	EPVSLEARLSRMHFHDSQRKVDYVLAYHYRKRGVHLAQGFPGHSLAIVSNGETGKEPHAGGPGDIELGPLDALEEERKEQREEFEHNLM	ANO2	Q9NQ90	MAD	3	17.4	FALSE
HTP0092B	Plasma	SciLifeLab peptide array	ANO2_HPRR3070037	IPLLPGSPRRLSPQAGSRGGQGPKHGQQCLKMPGPRAPGLQGGSNRDPGQPCGGESTRSSSVINNYLDAN	ANO2	Q9NQ90	MAD	0	1	FALSE
HTP0092B	Plasma	SciLifeLab peptide array	ANXA2_HPRR3460748	YDAGVKRKGTDVPKWISIMTERSVPHLQKVFDRYKSYSPYDMLESIRKEVKGDLENAFLNLVQCIQNKPLYFADRLYDSMKGKG	ANXA2	P07355	MAD	-1	0	FALSE
HTP0092B	Plasma	SciLifeLab peptide array	ANXA2_HPRR3460749	MGRQLAGCGDAGKKASFKMSTVHEILCKLSLEGDHSTPPSAYGSVKAYTNFDAERDALNIETAIKTKGVDEVTIVNI	ANXA2	P07355	MAD	1	48.1	FALSE
HTP0092B	Plasma	SciLifeLab peptide array	ANXA5_HPRR1350096	GTVTDFPGFDERADAETLRKAMKGLGTDEESILTLLTSRSNAQRQEISAAFKTLFGRDLLDDLKSELTGKFEKLIVALMKPSRLYDAYELKHALKGAGTNEKVLTEIIASRTPEELRAIKQVYEEEYGSSLEDDVVG	ANXA5	P08758	MAD	0	8.1	FALSE
HTP0092B	Plasma	SciLifeLab peptide array	ANXA5_HPRR1350097	LVVLLQANRDPDAGIDEAQVEQDAQALFQAGELKWGTDEEKFITIFGTRSVSHLRKVFDKYMTISGFQIEETIDRETSGNLEQLLLAVVKSIRSIPAYLAETLYYAMKGAG	ANXA5	P08758	MAD	0	11	FALSE
HTP0092B	Plasma	SciLifeLab peptide array	APOH_HPRR350085	EPGEEITYSCKPGYVSRGGMRKFICPLTGLWPINTLKCTPRVCPFAGILENGAVRYTTFEYPNTISFSCNTGFYLNGADSAKCTEEGKWSPELPVCAPIICPPPSIPTFATLRVYKPSAGNNSLYRDTAVFECLPQHAMFGNDTITC	APOH	P02749	MAD	2	4	FALSE
HTP0092B	Plasma	SciLifeLab peptide array	AQP4_HPRR4040261	MSDRPTARRWGKCGPLCTRENIMVAFKGVWTQAFWKA	AQP4	P55087	MAD	0	1	FALSE
HTP0092B	Plasma	SciLifeLab peptide array	ARFGAP1_HPRR3300073	TLPSMVHRVSGQPQSVTASSDKAFEDWLNDDLGSYQGAQGNRYVGFGNTPPPQKKEDDFLNNAMSSLYSGWSSFTTGASRFASAAKEGATKFGSQASQKASEL	ARFGAP1	Q8N6T3	MAD	-1	324.3	FALSE
HTP0092B	Plasma	SciLifeLab peptide array	ARFGAP1_HPRR3300076	DHFQNSNIDQSFWETFGSAEPTKTRKSPSSDSWTCADTSTERRSSDSWEVWGSASTNRNSNSDGGEGGEGTKKAVPPAVPTDDGWD	ARFGAP1	Q8N6T3	MAD	-1	9.1	FALSE
HTP0092B	Plasma	SciLifeLab peptide array	CACNA1S_HPRR3410011	EEEKSTMAKKLEQKPKGEGIPTTAKLKIDEFESNVNEVKDPYPSADFPGDDEEDEPEIPLSPRPRPLAEL	CACNA1S	Q13698	MAD	-1	16.6	FALSE
HTP0092B	Plasma	SciLifeLab peptide array	CACNA1S_HPRR3410014	ESPVFLEDFPQDPRTNPLARANTNNANANVAYGNSNHSNSHVFSSVHYEREFPEETETPATRGRALGQPCRVLGPHSKPCVE	CACNA1S	Q13698	MAD	1	16	FALSE
HTP0092B	Plasma	SciLifeLab peptide array	CARS_HPRR400045	SQCNLYMAARKAVRKRPNQALLENIALYLTHMLKIFGAVEEDSSLGFPVGGPGTSLSLEATVMPYLQVLSEFREGVRKIAREQKVPEILQLSDALRDNILPELGVRFEDHEGLPTVVKLVDRNTLLKEREEKRRVE	CARS	P49589	MAD	1	3	FALSE
HTP0092B	Plasma	SciLifeLab peptide array	CARS_HPRR400046	HLFEQYREKRPEAAQLLEDVQAALKPFSVKLNETTDPDKKQMLERIQHAVQLATEPLEKAVQSRLTGEEVNSCVEVLLEEAKDLLSDWLDSTLGCDVTDNSIFSKLPKFWEGDFHRDMEALNVLPPDVL	CARS	P49589	MAD	-1	4	FALSE
HTP0092B	Plasma	SciLifeLab peptide array	CASR_HPRR3140049	ADDDYGRPGIEKFREEAEERDICIDFSELISQYSDEEEIQHVVEVIQNSTAKVIVVFSSGPDLEPLIKEIVRRNITGKIWLASEAWASSSLI	CASR	P41180	MAD	-1	-1	FALSE
HTP0092B	Plasma	SciLifeLab peptide array	CASR_HPRR3140052	GTVTFSLSFDEPQKNAMAHRNSTHQNSLEAQKSSDTLTRHQPLLPLQCGETDLDLTVQETGLQGPVGGDQRPEVEDPEELSPALVVSSSQSFVISGG	CASR	P41180	MAD	-1	5.2	FALSE
HTP0092B	Plasma	SciLifeLab peptide array	CAST_HPRR3010396	STYIEELGKREVTIPPKYRELLAKKEGITGPPADSSKPIGPDDAIDALSSDFTCGSPTAAGKKTEKEESTEVLKAQSAGTVRSAAP	CAST	P20810	MAD	-1	6.5	FALSE
HTP0092B	Plasma	SciLifeLab peptide array	CAST_HPRR3010397	GPQNASSLKFEDAKLAAAISEVVSQTPASTTQAGAPPRDTSQSDKDLDDALDKLSDSLGQRQPDPDENKPMEDKVKE	CAST	P20810	MAD	-1	42.2	FALSE
HTP0092B	Plasma	SciLifeLab peptide array	CENPA_HPRR3730167	PSLGASSHQHSRRRQGWLKEIRKLQKSTHLL	CENPA	P49450	MAD	-1	0	FALSE
HTP0092B	Plasma	SciLifeLab peptide array	CENPA_HPRR3890121	RKLPFSRLAREICVKFTRGVDFNWQAQALLAL	CENPA	P49450	MAD	1	2.1	FALSE
HTP0092B	Plasma	SciLifeLab peptide array	CENPB_HPRR3310037	ERGVVQQVKGHYRQAMLLKAMAALEGQDPSGLQLGLTEALHFVAAAWQAVEPSDIAACFREAGFGGGPNATITTSL	CENPB	P07199	MAD	6	1.1	TRUE
HTP0092B	Plasma	SciLifeLab peptide array	CENPB_HPRR3310039	TFREKSRIIQEVEENPDLRKGEIARRFNIPPSTLSTILKNKRAILASERKYGVASTCRKTNKLSPYDKLEGLLIAWFQQIRAAGLPVKGIIL	CENPB	P07199	MAD	-1	0	FALSE
HTP0092B	Plasma	SciLifeLab peptide array	CENPE_HPRR1470072	EKIENLTRMLVTSSSLTLQQELKAKRKRRVTWCLGKINKMKNSNYADQFNIPTNITTKTHKLSINLLREIDESVCSESDVFSNTLDTLSEIEWNPATKLLNQENIESELNSLRADYDN	CENPE	Q02224	MAD	2	3.1	FALSE
HTP0092B	Plasma	SciLifeLab peptide array	CENPE_HPRR4340147	MRVKANLSLPYLQTKHIEKLFTANQRCSMEFHRIMKKLKYVLSYVTKIKEEQHESINKFEMDFIDEVEKQKELLIKIQHLQQDCDVPSRELRDLKLNQNMD	CENPE	Q02224	MAD	0	0.1	FALSE
HTP0092B	Plasma	SciLifeLab peptide array	CENPF_HPRR1390029	SCWKSENEKLLTQMESEKENLQSKINHLETCLKTQQIKSHEYNERVRTLEMDRENLSVEIRNLHNVLDSKSVEVETQKLAYMELQQKAEFSDQKHQKEIENMCLKTSQLTGQVEDLEHKLQLLSNEIMDKDRCYQDLHAEYE	CENPF	P49454	MAD	1	96.8	FALSE
HTP0092B	Plasma	SciLifeLab peptide array	CENPF_HPRR1390030	CISELSFSGPNALVPMDFLGNQEDIHNLQLRVKETSNENLRLLHVIEDRDRKVESLLNEMKELDSKLHLQEVQLMTKIEACIELEKIVGELKKENSDLSEKLEYFSCDHQEL	CENPF	P49454	MAD	-1	2	FALSE
HTP0092B	Plasma	SciLifeLab peptide array	CHD3_HPRR3420199	LKIKLGLLGGKREKGGSYVFQSDEGPEPEAEESDLDSGSVHSASGRPDGPVRTKKLKRGRPGRKKKKLLGCPA	CHD3	Q12873	MAD	0	1	FALSE
HTP0092B	Plasma	SciLifeLab peptide array	CHGA_HPRR300004	NSPMNKGDTEVMKCIVEVISDTLSKPSPMPVSQECFETLRGDERILSILRHQNLLKELQDLALQGAKERAHQQKKHSGFEDELSEVLENQSSQAELKEAVEEPSSKDVMEKREDSKEAEKSGEATDGARPQALPEPMQESK	CHGA	P10645	MAD	0	17.4	FALSE
HTP0092B	Plasma	SciLifeLab peptide array	CHRNA1_HPRR4110442	MKLGTWTYDGSVVAINPESDQPDLSNFMESGEWVIKESRGWKHSVTYSCCPDTPYLDITYHF	CHRNA1	P02708	MAD	-1	3	FALSE
HTP0092B	Plasma	SciLifeLab peptide array	CLDN11*_HPRR2010004	NDWVVTCGYTIPTCRKLDELGSKGLWADCVMATGLYHCKPLVDILILPGY	CLDN11*	O75508	MAD	0	1	FALSE
HTP0092B	Plasma	SciLifeLab peptide array	CLDN11_HPRR2010005	DAQAFGENRFYYTAGSSSPTHAKSAHV	CLDN11	O75508	MAD	-1	3.3	FALSE
HTP0092B	Plasma	SciLifeLab peptide array	CNP_HPRR2500894	TLARVIVDKYRDGTKMVSADAYKITPGARGAFSEEYKRLDEDLAAYCRRRDIRILVLDDTNHERERLEQLFEMADQYQYQVVLVEPKTAWRLDCAQLKEKNQW	CNP	P09543	MAD	11	21.4	FALSE
HTP0092B	Plasma	SciLifeLab peptide array	CNP_HPRR2500896	PGVLHCTTKFCDYGKAPGAEEYAQQDVLKKSYSKAFTLTISALFVTPKTTGARVELSEQQLQLWPSDVDKLSPTDNLPRGSRAHITL	CNP	P09543	MAD	36	38.5	FALSE
HTP0092B	Plasma	SciLifeLab peptide array	COL17A1_HPRR3500044	NLPSHVWSSTLPAGSSMGTYHNNMTTQSSSLLNTNAYSAGSVFGVPNNMASCSPTLHPGLSTSSSVFGMQNNLAPSLTTLSHGTTTTSTA	COL17A1	Q9UMD9	MAD	-1	0	FALSE
HTP0092B	Plasma	SciLifeLab peptide array	COL17A1_HPRR3500046	DGTEVTERIVTETVTTRLTSLPPKGGTSNGYAKTASLGGGSRLEKQSLTHGSSGYINSTGSTRGHASTSSYRRAHSPASTLPNSPGSTFERKTHVTR	COL17A1	Q9UMD9	MAD	5	10	FALSE
HTP0092B	Plasma	SciLifeLab peptide array	CPE_HPRR270004	VLSANLHGGDLVANYPYDETRSGSAHEYSSSPDDAIFQSLARAYSSFNPAMSDPNRPPCRKNDDDSSFVDGTTNGGAWYSVPGGMQDFNYLSSNCFEITVELSCEKFPPEETLKTYWEDNKNSLISYLEQIHR	CPE	P16870	MAD	-1	5.1	FALSE
HTP0092B	Plasma	SciLifeLab peptide array	CPE_HPRR4180113	GNYKLTASAPGYLAITKKVAVPYSPAAGVDFELESFSERKEEEKEELMEWWKMMS	CPE	P16870	MAD	2	56.3	FALSE
HTP0092B	Plasma	SciLifeLab peptide array	CRYAB_HPRR2700063	RPFFPFHSPSRLFDQFFGEHLLESDLFPTSTSLSPFYLRPPSFLRAPSWFDTGLSEMRLEKDRFSVNLDVKHFSPEELKVKVLGDVIE	CRYAB	P02511	MAD	1	1	FALSE
HTP0092B	Plasma	SciLifeLab peptide array	CRYAB_HPRR3880249	KYRIPADVDPLTITSSLSSDGVLTVNGPRKQVSGPERTIPITREEKPAVTAA	CRYAB	P02511	MAD	2	7	FALSE
HTP0092B	Plasma	SciLifeLab peptide array	CYP11A1_HPRR2120012	RSVLVKGCQTFLSAPREGLGRLRVPTGEGAGISTRSPRPFNEIPSPGDNGWLNLYHFWRETGTHKVHLHHVQNFQKYGPIYREKLGNVESVYVIDPEDVALLFKSEGPNPERFLIPPWVAYHQYYQRPIGVLLKKSAA	CYP11A1	P05108	MAD	-1	1	FALSE
HTP0092B	Plasma	SciLifeLab peptide array	CYP17A1_HPRR670228	PFLPRHGHMHNNFFKLQKKYGPIYSVRMGTKTTVIVGHHQLAKEVLIKKGKDFSGRPQMATLDIASNNRKGIAFADSGAHWQLHRRLAMATFALFKDGDQKLEKIICQEISTLCDMLATHNGQSIDISFPVFVAVTNVISL	CYP17A1	P05093	MAD	0	0	FALSE
HTP0092B	Plasma	SciLifeLab peptide array	CYP1A2_HPRR2760237	YQDFDKNSVRDITGALFKHSKKGPRASGNLIPQEKIVNLVNDIFGAGFDTVTTAISWSLMYLVTKPEIQRK	CYP1A2	P05177	MAD	2	1.1	TRUE
HTP0092B	Plasma	SciLifeLab peptide array	CYP21A2_HPRR3440127	LIGGTETTANTLSWAVVFLLHHPEIQQRLQEELDHELGPGASSSRVPYKDRARLPLLNATIAEV	CYP21A2	P08686	MAD	-1	1	FALSE
HTP0092B	Plasma	SciLifeLab peptide array	CYP21A2_HPRR3440129	GLTQKFGPIYRLHLGLQDVVVLNSKRTIEEAMVKKWADFAGRPEPLTYKLVSRNYPDLSLGDYSLLW	CYP21A2	P08686	MAD	0	0	FALSE
HTP0092B	Plasma	SciLifeLab peptide array	CYP2D6_HPRR3440145	EYDDPRFLRLLDLAQEGLKEESGFLREVLNAVPVLLHIPALAGKVLRFQKAFLTQLDELLTEHRMTWDPAQPPRDLTE	CYP2D6	P10635	MAD	-1	2	FALSE
HTP0092B	Plasma	SciLifeLab peptide array	CYP2D6_HPRR3440146	KGTTLITNLSSVLKDEAVWKKPFRF	CYP2D6	P10635	MAD	-1	6.1	FALSE
HTP0092B	Plasma	SciLifeLab peptide array	DARS_HPRR2370049	DKYPLAVRPFYTMPDPRNPKQSNSYDMFMRGEEILSGAQRIHDPQLLTERALHHGIDLEKIKAYIDSFRFGAPPHAGGGIGLERVTMLFLGLHNVRQTSMFPRD	DARS	P14868	MAD	2	5	FALSE
HTP0092B	Plasma	SciLifeLab peptide array	DARS_HPRR2370051	LHVQKIYVISLAEPRLPLQLDDAVRPEAEGEEEGRATVNQDTRLDNRVIDLRTSTSQAVFRLQSGICHLFRETLINKGFVEIQTPKIISAASEGGANVFTVSYFKNNAYLAQSPQLYKQMCICAD	DARS	P14868	MAD	3	10	FALSE
HTP0092B	Plasma	SciLifeLab peptide array	DBT_HPRR2550879	YVCFFGYPSFKYSHPHHFLKTTAALRGQVVQFKLSDIGEGIREVTVKEWYVKEGDTVSQFDSICEVQSDKASVTI	DBT	P11182	MAD	1	2	FALSE
HTP0092B	Plasma	SciLifeLab peptide array	DBT_HPRR2550880	VGKPLVDIETEALKDSEEDVVETPAVSHDEHTHQEIKGRKTLATPAVRRLAMENNIKLSEVVGSGKDGRILKEDILNYLEKQ	DBT	P11182	MAD	3	10.1	FALSE
HTP0092B	Plasma	SciLifeLab peptide array	DBT_HPRR2550882	LQFPILNASVDENCQNITYKASHNIGIAMDTEQGLIVPNVKNVQICSIFDIATELNRLQKLGSVGQLSTTDLTGGTFTLSNIGSIGGTFAKPVIMPPEVAIGA	DBT	P11182	MAD	144	7.9	TRUE
HTP0092B	Plasma	SciLifeLab peptide array	DLAT_HPRR3050438	LLPALSPTMTMGTVQRWEKKVGEKLSEGDLLAEIETDKATIGFEVQEEGYLAKILVPEGTRDVPLGTPLCIIVEKEADISAFADYRPTEVTDLKPQVPPPT	DLAT	P10515	MAD	-1	49.5	FALSE
HTP0092B	Plasma	SciLifeLab peptide array	DLST_HPRR140690	QNTCAMLTTFNEIDMSNIQEMRARHKEAFLKKHNLKLGFMSAFVKASAFALQEQPVVNAVIDDTTKEVVYRDYIDISVAVATPRGLVVPVIRNVEAMNFADIERTITELGEKARKNELAIEDMDGGTFTISNGGVFGSLFGTPII	DLST	P36957	MAD	0	1	FALSE
HTP0092B	Plasma	SciLifeLab peptide array	DLST_HPRR4210012	PLCVSGVQPLALRLPEGELPSRETFPACINNS	DLST	P36957	MAD	-1	0.1	FALSE
HTP0092B	Plasma	SciLifeLab peptide array	DPF2_HPRR2250142	SFPSIKPDTDQTLKKEGLISQDGSSLEALLRTDPLEKRGAPDPRVDDDSLGEFPVTNSRARKRILEPDDFLDDLDDEDYEEDTPKRRGKGKSKGKGVGS	DPF2	Q92785	MAD	1	11.1	FALSE
HTP0092B	Plasma	SciLifeLab peptide array	DPF2_HPRR3890698	AEEEGEDKEDSQPPTPVSQRSEEQKSKKGPDGLALPNNY	DPF2	Q92785	MAD	-1	1	FALSE
HTP0092B	Plasma	SciLifeLab peptide array	DSC1_HPRR1950849	SCTGTLVVHLDDYNDHAPQIDKEVTICQNNEDFAVLKPVDPDGPENGPPFQFFLDNSASKNWNIEEKDGKTAILRQRQNLDYNYYSVPIQIKDRHGLVATHMLTVRVCDCSTPSECRMKDKSTR	DSC1	Q08554	MAD	1	5.6	FALSE
HTP0092B	Plasma	SciLifeLab peptide array	DSG1_HPRR1370121	SLQLSIGVRNKAEFHHSIMSQYKLKASAISVTVLNVIEGPVFRPGSKTYVVTGNMGSNDKVGDFVATDLDTGRPSTTVRYVMGNNPADLLAVDSRTGKLTLKNKVTKEQYNMLGGKYQGTILSIDDNLQRTCTGT	DSG1	Q02413	MAD	1	2	FALSE
HTP0092B	Plasma	SciLifeLab peptide array	DSG1_HPRR4180926	EPVPECSDGAIHSWAVEGPQPEPRDITTVIPQIPPDNANIIECIDNSGVYTNEYGGREMQDLGGGERMTGFELTEGVKTSGMPEICQEYSG	DSG1	Q02413	MAD	23	10.5	TRUE
HTP0092B	Plasma	SciLifeLab peptide array	DSG3_HPRR3120202	FRPASKTFTVQKGISSKKLVDYILGTYQAIDEDTNKAASNVKYVMGRNDGGYLMIDSKTAEIKFVKNMNRDSTFIVNKTITAEVLAIDEYTGKTSTGTVYVRVPDFND	DSG3	P32926	MAD	4	6	FALSE
HTP0092B	Plasma	SciLifeLab peptide array	DSG3_HPRR3120203	SSPSVVVSARTLNNRYTGPYTFALEDQPVKLPAVWSITTLNATSALLRAQEQIPPGVYHISLVLTDSQNNRCEMPRSLTLEVCQCDNRGICGTSY	DSG3	P32926	MAD	1	1	FALSE
HTP0092B	Plasma	SciLifeLab peptide array	DST_HPRR2620326	KPRCQNVAEDMDIQLCASILNENSDENENINTMILLDKMHSCSSLEKQQRVNVVQLASPSENNLVTEKSNLPEYTTEIAGKSKENLLNHE	DST	Q03001	MAD	-1	28.3	FALSE
HTP0092B	Plasma	SciLifeLab peptide array	DST_HPRR2620328	MLPGEHQQVLSNLQSRFEDFLEDSQESQVFSGSDITQLEKEVNVCKQYYQELLKSAEREEQEESVYNLYISEVRNIRLRLENCEDRLIRQIRTPLERDDLHESVF	DST	Q03001	MAD	-1	4.2	FALSE
HTP0092B	Plasma	SciLifeLab peptide array	EGFR_HPRR290109	QQGFFSSPSTSRTPLLSSLSATSNNSTVACIDRNGLQSCPIKEDSFLQRYSSDPTGALTEDSIDDTFLPVPEYINQSVPKRPAGSVQNPVYHNQPLNPAPSRDPHYQDPHSTAVGNPEYLNTVQPTCVNSTFDSPAHWAQKGSHQISLD	EGFR	P00533	MAD	0	25.1	FALSE
HTP0092B	Plasma	SciLifeLab peptide array	ENO3*_HPRR3360053	DGTENKSKFGANAILGVSLAVCKAG	ENO3*	P13929;P09104;P06733	MAD	1	0	TRUE
HTP0092B	Plasma	SciLifeLab peptide array	ENO3*_HPRR4290181	QACKLAQENGWGVMVSHRSGETEDTFIADLVVGLCTGQIKTGAPCRSERLAKYNQLMRIEEE	ENO3*	P13929;P09104;P06733	MAD	0	0.1	FALSE
HTP0092B	Plasma	SciLifeLab peptide array	ENO3*_HPRR4370068	LKNVIKEKYGKDATNVGDEGGFAPNIL	ENO3*	P13929;P09104;P06733	MAD	1	10.1	FALSE
HTP0092B	Plasma	SciLifeLab peptide array	ENO3_HPRR252476	ALELLKTAIQAAGYPDKVVIGMDVAASEFYRNGKYDLDFKSPDDPARHITGEKLGELYKSFIKNYPVVSIEDPFDQDDWATWTSFLSGVNIQIVGDDLTVTN	ENO3	P13929	MAD	1	6	FALSE
HTP0092B	Plasma	SciLifeLab peptide array	F12_HPRR350057	YHKCTHKGRPGPQPWCATTPNFDQDQRWGYCLEPKKVKDHCSKHSPCQKGGTCVNMPSGPHCLCPQHLTGNHCQKEKCFEPQLLRFFHKNEIWYRTEQAAVARCQCKGPDA	F12	P00748	MAD	-1	-0.9	FALSE
HTP0092B	Plasma	SciLifeLab peptide array	F2_HPRR350027	VRRQECSIPVCGQDQVTVAMTPRSEGSSVNLSPPLEQCVPDRGQQYQGRLAVTTHGLPCLAWASAQAKALSKHQDFNSAVQLVENFCRNPDGDEEGVWCYVAGKPGDFGYCDLNY	F2	P00734	MAD	2	4	FALSE
HTP0092B	Plasma	SciLifeLab peptide array	F2_HPRR3790030	EGVWCYVAGKPGDFGYCDLNYCEEAVEEETGDGLDEDSDRAIEGRTATSEYQTFFNPRTFGSGEADCGLRPLFEKKSLE	F2	P00734	MAD	3	22.5	FALSE
HTP0092B	Plasma	SciLifeLab peptide array	F2_HPRR3790031	FEALESSTATDVFWAKYTACETARTPRDKLAACLEGNCAEGLGTNYRGHVNITRSGIECQLWRSRYPHKPEINSTTHPGADLQ	F2	P00734	MAD	-1	7.6	FALSE
HTP0092B	Plasma	SciLifeLab peptide array	F8_HPRR232500	FTQPLYRGELNEHLGLLGPYIRAEVEDNIMVTFRNQASRPYSFYSSLISYEEDQRQGAEPRKNFVKPNETKTYFWKVQHHMAPTKDEFDCKAWAYFSDVDLEKDVHSGLIGPLLVCHTNTLNPAHGRQVTVQEFAL	F8	P00451	MAD	5	4.1	TRUE
HTP0092B	Plasma	SciLifeLab peptide array	F8_HPRR232926	ESKAISDAQITASSYFTNMFATWSPSKARLHLQGRSNAWRPQVNNPKEWLQVDFQKTMKVTGVTTQGVKSLLTSMYVKEFLISSSQDGHQWTLFFQNGKVKVFQGNQDSFTPVVNSLDPPLLTRYLRIHPQSWVHQIALRMEVLGCEA	F8	P00451	MAD	0	0	FALSE
HTP0092B	Plasma	SciLifeLab peptide array	FARS2_HPRR2010057	GTPLFSVYDNLSPVVTTWQNFDSLLIPADHPSRKKGDNYYLNRTHMLRAHTSAHQWDLLHAGLDAFLVVGDVYRRDQIDSQHYPIFHQLEAVRLFSKHELFAGIKDGES	FARS2	O95363	MAD	0	1	FALSE
HTP0092B	Plasma	SciLifeLab peptide array	FARSA_HPRR400146	EVIEAELRSTKHWELTAEGEEIAREGSHEARVFRSIPPEGLAQSELMRLPSGKVGFSKAMSNKWIRVDKSAADGPRVFRVVDSMEDEVQRRLQLVRGGQAEKLGEKERSELRKRKLLAEVTLKTYWVSKG	FARSA	Q9Y285	MAD	-1	1	FALSE
HTP0092B	Plasma	SciLifeLab peptide array	FHL1_HPRR252319	RFTAVEDQYYCVDCYKNFVAKKCAGCKNPITGFGKGSSVVAYEGQSWHDYCFHCKIRRAPPLSNN	FHL1	Q13642	MAD	-1	-1	FALSE
HTP0092B	Plasma	SciLifeLab peptide array	FLG_HPRR2551092	SERWSGSASRNHLGSAWEQSRDGSRHPGSHHEDRAGHGHSADSSRQSGTRHTESSSRGQAASSHEQARSSAGERHGSRHQLQSA	FLG	P20930	MAD	2	12	FALSE
HTP0092B	Plasma	SciLifeLab peptide array	FLG_HPRR2551093	SADSSRQSGTPHAETSSGGQAASSHEQARSSPGERHGSRHQQSADSSRHSGIPRRQASSAVRDSGHWGSSGSQASDSEGHSEESDTQSVSGHGQDGPHQQSHQESAR	FLG	P20930	MAD	-1	1	FALSE
HTP0092B	Plasma	SciLifeLab peptide array	FLG_HPRR2551094	RKRLSERLEEKEDNEEGVYDYENTGRMTQKWIQSGHIATYYTIQDEAYDTTDSLLEENKIYERSRSSDGKSSSQVNRSRHENTSQVPLQESR	FLG	P20930	MAD	2	14	FALSE
HTP0092B	Plasma	SciLifeLab peptide array	FLNA_HPRR232447	VICVRFGGEHVPNSPFQVTALAGDQPSVQPPLRSQQLAPQYTYAQGGQQTWAPERPLVGVNGLDVTSLRPFDLVIPFTIKKGEITGEVRMPSGKVAQPTITDNKDGTVTVRYAPSEAGLHEMDIRYDNMHIPGSPLQFYVDYVNCGHVT	FLNA	P21333	MAD	1	2	FALSE
HTP0092B	Plasma	SciLifeLab peptide array	FLNB_HPRR1310070	HGKVGEAGLLSVDCSEAGPGALGLEAVSDSGTKAEVSIQNNKDGTYAVTYVPLTAGMYTLTMKYGGELVPHFPARVKVEPAVDTSRIKVFGPGIEGKDVFREATTDFTV	FLNB	O75369	MAD	-1	7.1	FALSE
HTP0092B	Plasma	SciLifeLab peptide array	FLNC_HPRR1310054	DPVPKSPFVVNVAPPLDLSKIKVQGLNSKVAVGQEQAFSVNTRGAGGQGQLDVRMTSPSRRPIPCKLEPGGGAEAQAVRYMPPEEGPYKVDITYDGHPVPGSPFAVEGVLPPDPSKVC	FLNC	Q14315	MAD	1	17.2	FALSE
HTP0092B	Plasma	SciLifeLab peptide array	FLNC_HPRR1310055	HSLHETSTVLVETVTKSSSSRGSSYSSIPKFSSDASKVVTRGPGLSQAFVGQKNSFTVDCSKAGTNMMMVGVHGPKTPCEEVYVKHMGNRVYNVTYTVKEKGDY	FLNC	Q14315	MAD	0	2	FALSE
HTP0092B	Plasma	SciLifeLab peptide array	FN1_HPRR2050095	AQQMVQPQSPVAVSQSKPGCYDNGKHYQINQQWERTYLGNALVCTCYGGSRGFNCESKPEAEETCFDKYTGNTYRVGDTYERPKDSMIWDCTCIGAGRGRISCTIANRCHEGGQSYKIGDTWRRPHETGGYMLECVCLGNGKGEW	FN1	P02751	MAD	-2	1	FALSE
HTP0092B	Plasma	SciLifeLab peptide array	FN1_HPRR2050096	HEEICTTNEGVMYRIGDQWDKQHDMGHMMRCTCVGNGRGEWTCIAYSQLRDQCIVDDITYNVNDTFHKRHEEGHMLNCTCFGQGRGRWKCDPVDQCQDSETGTFYQIGDSWEKYVHGVRYQCYCYGRGIG	FN1	P02751	MAD	1	2	FALSE
HTP0092B	Plasma	SciLifeLab peptide array	FTCD_HPRR2280077	MRLPKNIPEEKDRRTAALQEGLRRAVSVPLTLAETVASLWLALQELARCGNLACRSDLQVAAKALEMGVFGAYFNVLINLRDITDEAFKDQIHHRV	FTCD	O95954	MAD	1	2	FALSE
HTP0092B	Plasma	SciLifeLab peptide array	FTCD_HPRR2890163	GVSVDECVLCAQAFGQRLAEELDVPVYLYGEAARMDSRRTLPAIRAGEYEALPKKLQQADWAPDFGPSSF	FTCD	O95954	MAD	188	115.6	TRUE
HTP0092B	Plasma	SciLifeLab peptide array	FTCD_HPRR2890164	MSQLVECVPNFSEGKNQEVIDAISGAITQTPGCVLLDVDAGPSTNRTVYTFVGPPECVVEGALNAARVASRLIDMSRHQGEH	FTCD	O95954	MAD	-1	4.1	FALSE
HTP0092B	Plasma	SciLifeLab peptide array	FTCD_HPRR2890165	TKEQAHRIALNLREQGRGKDQPGRLKKVQGIGWYLDEKNLAQVSTNLLDFEVTALHTVYEETCREAQELSLPVVGSQLVGLVPLKALLD	FTCD	O95954	MAD	0	1	FALSE
HTP0092B	Plasma	SciLifeLab peptide array	G6PC2_HPRR4090002	INSEMFLLSCRGGNNYTLSF	G6PC2	Q9NQR9	MAD	1	2	FALSE
HTP0092B	Plasma	SciLifeLab peptide array	GAD1_HPRR2920425	QSSKNLLSCENSDRDARFRRTETDFSNLFARDLLPAKNGEEQTVQFLLEVVDILLNYVRKTFDRS	GAD1	Q99259	MAD	0	1	FALSE
HTP0092B	Plasma	SciLifeLab peptide array	GAD1_HPRR2920426	SSATSSNAGADPNTTNLRPTTYDTWCGVAHGCTRKLGLKICGFLQRTNSLEEKSRLVSAFKER	GAD1	Q99259	MAD	-1	0	FALSE
HTP0092B	Plasma	SciLifeLab peptide array	GAD2_HPRR3020281	SGFWSFGSEDGSGDSENPGTARAWCQVAQKFTGGIGNKLCALLYGDAEKPAESGGSQPPRAAARKAACACDQKPCSCSKVDVNYAFLHATDLLP	GAD2	Q05329	MAD	-1	-0.9	FALSE
HTP0092B	Plasma	SciLifeLab peptide array	GAD2_HPRR3890856	STKVIDFHYPNELLQEYNWELADQPQNLEEILMHCQTTLKYAIKTGHPRY	GAD2	Q05329	MAD	-1	0	FALSE
HTP0092B	Plasma	SciLifeLab peptide array	GARS_HPRR2440240	KLMSDKKCSVEKKSEMESVLAQLDNYGQQELADLFVNYNVKSPITGNDLSPPVSFNLMFKTFIGPGGNMPGYLRPETAQGIFLNFKRLLEFNQGKLPFAAAQI	GARS	P41250	MAD	1	3	FALSE
HTP0092B	Plasma	SciLifeLab peptide array	GARS_HPRR2440243	LPLSQNQEFMPFVKELSEALTRHGVSHKVDDSSGSIGRRYARTDEIGVAFGVTIDFDTVNKTPHTATLRDRDSMRQIRAEISELPSIVQDLANGNITWADVEARYPLFEG	GARS	P41250	MAD	1	7.1	FALSE
HTP0092B	Plasma	SciLifeLab peptide array	GIF_HPRR3050322	LFGQVLKDIVEKISMKIKDNGIIGDIYSTGLAMQALSVTPEPSKKEWNCKKTTDMILNEIKQGKFHNPMSIAQILPSLKGKTYLDVPQVTCSPDHEVQPTLPSNP	GIF	P27352	MAD	0	1.1	FALSE
HTP0092B	Plasma	SciLifeLab peptide array	GIF_HPRR3050324	TSSAYPNPSILIAMNLAGAYNLKAQKLLTYQLMSSDNNDLTIGQLGLTIMALTSSCRDPGDKVSILQRQMENWAPSSPNAEASAFYGPSLAILALCQKNS	GIF	P27352	MAD	1	1.1	FALSE
HTP0092B	Plasma	SciLifeLab peptide array	GLRA1_HPRR2140062	LLRFRRKRRHHKEDEAGEGRFNFSAYGMGPACLQAKDGISVKGANNSNTTNPPPAPSKSPEEMRKLFIQRAKKIDK	GLRA1	P23415	MAD	0	2.1	FALSE
HTP0092B	Plasma	SciLifeLab peptide array	GOLGB1_HPRR1951658	RLSGLANVVLHELSGDDDTDQNMRAPLDPELHQESDMEFNNTTQEDVQERLAYAEQLVVELKDIIRQKDVQLQQKDEALQEERKAADNKIKKLKLHAKAKLTSLNKYIEEMKAQGGTVLPTEPQSEEQLSKHD	GOLGB1	Q14789	MAD	-1	-1	FALSE
HTP0092B	Plasma	SciLifeLab peptide array	GOLGB1_HPRR1951659	KHDNQTNVTEEGTQSIPGETEEQDSLSMSTRPTCSESVPSAKSANPAVSKDFSSHDEINNYLQQIDQLKERIAGLEEEKQKNKEFSQTLENEKNTLLSQISTKDGELKMLQEEVTKMNLLNQQIQEELS	GOLGB1	Q14789	MAD	0	6.2	FALSE
HTP0092B	Plasma	SciLifeLab peptide array	GPR62_HPRR2770122	PVRLALGRLSRRALPGPVRACTPQAWHPRALLQCLQRPPEGPAVGPSEAPEQTPELAGGRSPAYQGPPESSL	GPR62	Q9BZJ7	MAD	1	39.3	FALSE
HTP0092B	Plasma	SciLifeLab peptide array	GYPA_HPRR2110422	TSSSVTKSYISSQTNDTHKRDTYAATPRAHEVSEISVRTVYPPEEETGERVQLAHHFSEP	GYPA	P02724	MAD	-1	3	FALSE
HTP0092B	Plasma	SciLifeLab peptide array	GYPE*_HPRR3290141	TTGVAMHTSTSSSVTKSYISSQTN	GYPE*	P15421;P06028;P02724	MAD	-1	0	FALSE
HTP0092B	Plasma	SciLifeLab peptide array	HARS_HPRR3010485	MAERAALEELVKLQGERVRGLKQQKASAELIEEEVAKLLKLKAQLGPDESKQKFVLKTPKGTRD	HARS	P12081	MAD	1	6.1	FALSE
HTP0092B	Plasma	SciLifeLab peptide array	HARS_HPRR4040036	DGVIKLRSVTSREEVDVRREDLVEEIKRRTGQPLCIC	HARS	P12081	MAD	0	3.1	FALSE
HTP0092B	Plasma	SciLifeLab peptide array	HDC_HPRR1320013	LKGPNCLTENVLKEIAKAGRLFLIPATIQDKLIIRFTVTSQFTTRDDILRDWNLIRDAATLILSQHCTSQPSPRVGNLISQIRGARAWACGTSLQSVSGAGDDPVQARKIIKQPQRVGAGPMKRENGLHLETLLDPVDDCFSE	HDC	P19113	MAD	-1	0	FALSE
HTP0092B	Plasma	SciLifeLab peptide array	HDC_HPRR1320014	PALTSWPSLLGDMLADAINCLGFTWASSPACTELEMNVMDWLAKMLGLPEHFLHHHPSSQGGGVLQSTVSESTLIALLAARKNKILEMKTSEPDADESCLNARLVAYASDQAHSSVEK	HDC	P19113	MAD	-1	4.1	FALSE
HTP0092B	Plasma	SciLifeLab peptide array	HINT2_HPRR2470372	GQVRGAAGVTDGNEVAKAQQATPGGAAPTIFSRILDKSLPADILYEDQQCLVFRDVAPQAPVHFLVIPKKP	HINT2	Q9BX68	MAD	0	3	FALSE
HTP0092B	Plasma	SciLifeLab peptide array	HINT2_HPRR2470373	IPRISQAEEEDQQLLGHLLLVAKQTAKAEGLGDGYRLVINDGKLGAQSVYHLHIHVLGGRQLQWP	HINT2	Q9BX68	MAD	0	0	FALSE
HTP0092B	Plasma	SciLifeLab peptide array	HMGCR_HPRR650031	MAGSIGGYNAHAANIVTAIYIACGQDAAQNVGSSNCITLMEASGPTNEDLYISCTMPSIEIGTVGGGTNLLPQQACLQMLGVQGACKDNPGENARQLARIVCGTVMAGELSLMAALAAGHLVKSHMIHNRSKINLQDLQG	HMGCR	P04035	MAD	1	2.1	FALSE
HTP0092B	Plasma	SciLifeLab peptide array	IAPP_HPRR3830128	LVHSSNNFGAILSSTNVGSNTYGKRNAVEVLKREPLNYLP	IAPP	P10997	MAD	-2	1	FALSE
HTP0092B	Plasma	SciLifeLab peptide array	IARS_HPRR2470884	NWYVRMNRRRLKGENGMEDCVMALETLFSVLLSLCRLMAPYTPFLTELMYQNLKVLIDPVSVQDKDTLSIHYLMLPRVREELIDKKTESAVSQMQSVIEL	IARS	P41252	MAD	0	4.3	FALSE
HTP0092B	Plasma	SciLifeLab peptide array	IARS_HPRR2470886	AREVINRIQKLRKKCNLVPTDEITVYYKAKSEGTYLNSVIESHTEFIFTTIKAPLKPYPVSPSDKVLIQEKTQLKGSELEITLTRGSSLPGPACAYVNLNICANGSEQGGVLL	IARS	P41252	MAD	0	1	FALSE
HTP0092B	Plasma	SciLifeLab peptide array	ICA1_HPRR1510003	DELLDMKSEEGACLGPVAGTPEPEGADKDDLLLLSEIFNASSLEEGEFSKEWAAVFGDGQVKEPVPTMALGEPDPKAQTGSGFLPSQLLDQNMKDLQASLQEPAKAASDLTAWFSLFADLDPLSNPDAVGKTDKEHELL	ICA1	Q05084	MAD	6	78.4	FALSE
HTP0092B	Plasma	SciLifeLab peptide array	ICA1_HPRR4160047	HESFKGYQPYEFTTLKSLQDPMKKLVEKEEKKKINQQESTDAAVQEPSQLISLEEENQRKESSSFK	ICA1	Q05084	MAD	0	38.8	FALSE
HTP0092B	Plasma	SciLifeLab peptide array	IFIH1_HPRR330271	GWTREFVEALRRTGSPLAARYMNPELTDLPSPSFENAHDEYLQLLNLLQPTLVDKLLVRDVLDKCMEEELLTIEDRNRIAAAENNGNESGVRELLKRIVQKENWFSAFLNVLRQTGNNELVQELTGSDCSESNAEIENLSQVDGPQVEEQ	IFIH1	Q9BYX4	MAD	4	4.1	FALSE
HTP0092B	Plasma	SciLifeLab peptide array	IFNA21*_HPRR3360011	MNADSILAVKKYFRRITLYLTEKKYSPCA	IFNA21*	P01568;P05014;P01567;P01566;P05015;P01571;P01570;P01569;P05013;P01562;P01563;P32881	MAD	1	1	FALSE
HTP0092B	Plasma	SciLifeLab peptide array	IFNA21*_HPRR3360040	AEAISVLHEVIQQTFNLFSTKDSSVA	IFNA21*	P01568;P05014;P01567;P01566;P05015;P01571;P01570;P01569;P05013;P01562;P01563;P32881	MAD	-1	-1	FALSE
HTP0092B	Plasma	SciLifeLab peptide array	IFNB1_HPRR2760323	ETIVENLLANVYHQINHLKTVLEEKLEKEDFTRGKLMSSLHLKRYYGRILHYLKAKEYSHCAWTIVRVEILRNFYFINR	IFNB1	P01574	MAD	1	1	FALSE
HTP0092B	Plasma	SciLifeLab peptide array	IFNB1_HPRR2760324	YNLLGFLQRSSNFQCQKLLWQLNGRLEYCLKDRMNFDIPEEIKQLQQFQKEDAALTIYEMLQNIFAIFRQDSSSTGWN	IFNB1	P01574	MAD	2	2	FALSE
HTP0092B	Plasma	SciLifeLab peptide array	IFNL1_HPRR3790181	PVPTSKPTTTGKGCHIGRFKSLSP	IFNL1	Q8IU54	MAD	-1	1.2	FALSE
HTP0092B	Plasma	SciLifeLab peptide array	IFNL3*_HPRR3260137	AVPVARLRGALPDARGCHIAQFKSLSPQE	IFNL3*	Q8IZI9;Q8IZJ0	MAD	-2	-0.9	FALSE
HTP0092B	Plasma	SciLifeLab peptide array	IFNW1*_HPRR3360041	MLLAQMRRISLFSCLKDRHDFRFPQE	IFNW1*	P05000;P01568;P05014;P01567;P01566;P05015;P01571;P01570;P01569;P05013;P01562;P01563;P32881	MAD	-1	2	FALSE
HTP0092B	Plasma	SciLifeLab peptide array	IFNW1_HPRR3780122	AWNMTLLDQLHTGLHQQLQHLETCLLQVVGEGESAGAISSPALTLRRYFQGIRVYLKEK	IFNW1	P05000	MAD	0	0	FALSE
HTP0092B	Plasma	SciLifeLab peptide array	IL17A_HPRR2760112	NPGCPNSEDKNFPRTVMVNLNIHNRNTNTNPKRSSDYYNRSTSPWNLHRNEDPERYPSVIWEAKCRHLGCIN	IL17A	Q16552	MAD	0	1	FALSE
HTP0092B	Plasma	SciLifeLab peptide array	IL17A_HPRR4290151	EILVLRREPPHCPNSFRLEKILVS	IL17A	Q16552	MAD	-1	0	FALSE
HTP0092B	Plasma	SciLifeLab peptide array	IL17F_HPRR2570223	RKIPKVGHTFFQKPESCPPVPGGSMKLDIGIINENQRVSMSRNIESRSTSPWNYTVTWDPNRYPSEVVQAQCRNLGCINAQGKE	IL17F	Q96PD4	MAD	0	23.4	FALSE
HTP0092B	Plasma	SciLifeLab peptide array	IL17F_HPRR4110234	QQETLVVRRKHQGCSVSFQLEKVLVTV	IL17F	Q96PD4	MAD	0	0	FALSE
HTP0092B	Plasma	SciLifeLab peptide array	IL22_HPRR1060056	PISSHCRLDKSNFQQPYITNRTFMLAKEASLADNNTDVRLIGEKLFHGVSMSERCYLMKQVLNFTLEEVLFPQSDRFQPYMQEVVPFLARLSNRLSTCHIEGDDLHIQRNVQKLKDTVKKLGESGEIKAIGELDLLFMSLRNA	IL22	Q9GZX6	MAD	1	2	FALSE
HTP0092B	Plasma	SciLifeLab peptide array	INS_HPRR380034	SHLVEALYLVCGERGFFYTPKTRREAEDLQVGQVELGGGPGAGSLQPLALEGSLQKRGIVEQCCTSICSLYQLENYC	INS	P01308	MAD	1	2	FALSE
HTP0092B	Plasma	SciLifeLab peptide array	INSM2_HPRR3450147	KHLSTHEAGSARALAPGFGSERGAPLAFACPLCGAHFPTADIREKHRLWHAVREELLLPALAGAPPETSGPSGPSDGSAQQIFSCKHCPSTF	INSM2	Q96T92	MAD	1	53.4	FALSE
HTP0092B	Plasma	SciLifeLab peptide array	INSM2_HPRR3450148	AEGKENSRIERTADQHPQARDSSGADQHPDSAPRQGLQVLTHPEPPLPQGPYTEGVLGRRVPVPGSTSGGRGSEIFVCP	INSM2	Q96T92	MAD	0	2	FALSE
HTP0092B	Plasma	SciLifeLab peptide array	KCND1_HPRR230897	SSQPVGPGSLLSSCCPRRAKRRAIRLANSTASVSRGSMQELDMLAGLRRSHAPQSRSSLNAKPHDSLDLNCDSRDFVAAIISIPTPPANTPDESQPSSPGGGGRAGSTLRNSSLGT	KCND1	Q9NSA2	MAD	0	1.1	FALSE
HTP0092B	Plasma	SciLifeLab peptide array	KCND1_HPRR230898	NTLDRYPDTLLGSSEKEFFYDADSGEYFFDRDPDMFRHVLNFYRTGRLHCPRQECIQAFDEELAFYGLVPELVGDCCLEEYRDRKKENAERLAEDEEAEQ	KCND1	Q9NSA2	MAD	1	8.1	FALSE
HTP0092B	Plasma	SciLifeLab peptide array	KCND1_HPRR4320417	KTTCHEFTDELTFSEALGAVSPGGRTSRSTSVSSQPVGPGSLLSSCCPRRAKRRAIRLANSTASVSRGSM	KCND1	Q9NSA2	MAD	0	1	FALSE
HTP0092B	Plasma	SciLifeLab peptide array	KCNJ10_HPRR4030424	EFTPAISLSASGKYIADFSLFDQVVKVASPSGLRDSTVRYGDPEKLKLEESLREQAEKEGSALSVRISNV	KCNJ10	P78508	MAD	0	4	FALSE
HTP0092B	Plasma	SciLifeLab peptide array	KCNJ10_HPRR4030425	MTSVAKVYYSQTTQTESRPLMGPGIRRRRVLTKDGRSNVRMEHIADKRFLYLKDLWTTFIDMQWRY	KCNJ10	P78508	MAD	-1	10.9	FALSE
HTP0092B	Plasma	SciLifeLab peptide array	KCNJ10_HPRR4030426	VAVAHGDLLELDPPANHTPCVVQVHTLTG	KCNJ10	P78508	MAD	0	1.1	FALSE
HTP0092B	Plasma	SciLifeLab peptide array	KCNJ11_HPRR3690159	TVKVPTPLCTARQLDEDHSLLEALTLASARGPLRKRSVPMAKAKPKFSISPDSLS	KCNJ11	Q14654	MAD	0	0.1	FALSE
HTP0092B	Plasma	SciLifeLab peptide array	KCNJ11_HPRR4080108	YVLTRLAEDPAKPRYRARQRRARFVSKKGNCNVAH	KCNJ11	Q14654	MAD	-2	0	FALSE
HTP0092B	Plasma	SciLifeLab peptide array	KCNJ11_HPRR650098	RLCFMLRVGDLRKSMIISATIHMQVVRKTTSPEGEVVPLHQVDIPMENGVGGNSIFLVAPLIIYHVIDANSPLYDLAPSDLHHHQDLEIIVILEGVVETTGIT	KCNJ11	Q14654	MAD	0	0	FALSE
HTP0092B	Plasma	SciLifeLab peptide array	KEL_HPRR1952469	PRPCETSVCLDLRDHYLASGNTSVAPCTDFFSFACGRAKETNNSFQELATKNKNRLRRILEVQNSWHPGSGEEKAFQFYNSCMDTLAIEAAGTGPLRQVIEELGGWRISGKWT	KEL	P23276	MAD	1	1	FALSE
HTP0092B	Plasma	SciLifeLab peptide array	KEL_HPRR1952470	DQLKEMAPAIDWLSCLQATFTPMSLSPSQSLVVHDVEYLKNMSQLVEEMLLKQRDFLQSHMILGLVVTLSPALDSQFQEARRKLSQKLRELTEQPPMPARPRWMKCVEETGTFFEPTLAALFVREAFGPSTRSAAMKL	KEL	P23276	MAD	3	2	TRUE
HTP0092B	Plasma	SciLifeLab peptide array	LAD1_HPRR1350086	SPRTISFRMKPKKENSETTLTRSASMKLPDNTVKLGEKLERYHTAIRRSESVKSRGLPCTELFVAPVGVASKRHLFEKELAGQSRAEPASSRKENLRLSGVVTSRLNLWISRTQESGDQDPQEAQKASSATERTQWGQKSDSSL	LAD1	O00515	MAD	0	1.1	FALSE
HTP0092B	Plasma	SciLifeLab peptide array	LAMP2_HPRR232315	LELNLTDSENATCLYAKWQMNFTVRYETTNKTYKTVTISDHGTVTYNGSICGDDQNGPKIAVQFGPGFSWIANFTKAASTYSIDSVSFSYNTGDNTTFPDAEDKGILTVDELLAIRIPLNDLFRCNSLSTLEKNDVVQHYWDVLVQA	LAMP2	P13473	MAD	-1	0.1	FALSE
HTP0092B	Plasma	SciLifeLab peptide array	LAMP2_HPRR232316	GTVSTNEFLCDKDKTSTVAPTIHTTVPSPTTTPTPKEKPEAGTYSVNNGNDTCLLATMGLQLNITQDKVASVININPNTTHSTGSCRSHTALLRLNSSTIKYLDFVFAVKNENRFYLKEVNISMYLVNGSVFSIANNNLSY	LAMP2	P13473	MAD	-2	-0.8	FALSE
HTP0092B	Plasma	SciLifeLab peptide array	LAMP2_HPRR2810012	ASTYSIDSVSFSYNTGDNTTFPDAEDKGILTVDELLAIRIPLNDLFRCNSLSTLEKNDVVQHYWDVLV	LAMP2	P13473	MAD	1	6.1	FALSE
HTP0092B	Plasma	SciLifeLab peptide array	LAMP2_HPRR2810014	LGSSYMCNKEQTVSVSGAFQINTFDLRVQPFNVTQGKYSTAQDCSADDDNF	LAMP2	P13473	MAD	-1	-1	FALSE
HTP0092B	Plasma	SciLifeLab peptide array	LBR_HPRR3410125	MPSRKFADGEVVRGRWPGSSLYYEVEILSHDSTSQLYTVKYKDGTELELKENDIKPLTSFRQRKGGSTSSS	LBR	Q14739	MAD	0	1	FALSE
HTP0092B	Plasma	SciLifeLab peptide array	LBR_HPRR3410127	EARREVEVKLTPLILKPFGNSISRYNGEPEHIERNDAPHKNTQEKFNLSQESSYIATQYSLRPRREEVKLKEIDSKEEKYVAKELAVRTF	LBR	Q14739	MAD	0	23.1	FALSE
HTP0092B	Plasma	SciLifeLab peptide array	LRP4_HPRR1770061	IQRVDKYSGRNKETVLANVEGLMDIIVVSPQRQTGTNACGVNNGGCTHLCFARASDFVCACPDEPDSQPCSLVPGLVPPAPRATGMSEKSPVLPNTPPTTLYSSTTRTRTSLEEVEGRCSERDARLGLCARSNDAVPAAP	LRP4	O75096	MAD	0	15.1	FALSE
HTP0092B	Plasma	SciLifeLab peptide array	LRP4_HPRR1770062	PGMGNLTYSNPSYRTSTQEVKIEAIPKPAMYNQLCYKKEGGPDHNYTKEKIKIVEGICLLSGDDAEWDDLKQLRSSRGGLLRDHVCMKTDTVSIQASSGSLDDTETEQLLQEEQSECSSVH	LRP4	O75096	MAD	-2	3.3	FALSE
HTP0092B	Plasma	SciLifeLab peptide array	MARS_HPRR430074	FVLQDTVEQLRCEHCARFLADRFVEGVCPFCGYEEARGDQCDKCGKLINAVELKKPQCKVCRSCPVVQSSQHLFLDLPKLEKRLEEWLGRTLPGSDWTPNAQFITRSWLRDGLKPRCITRDLKWGTPVPLEGFEDKVFYVWFD	MARS	P56192	MAD	4	4	FALSE
HTP0092B	Plasma	SciLifeLab peptide array	MBP_HPRR2850726	ASTNSETNRGESEKKRNLGELSRTTSEDNEVFGEADANQNNGTSSQDTAVTDSKRTADPKNAWQDAHPADPGSRPHLIRLFSRDAP	MBP	P02686	MAD	2	33.3	FALSE
HTP0092B	Plasma	SciLifeLab peptide array	MBP_HPRR2850727	DENPVVHFFKNIVTPRTPPPSQGKGRGLSLSRFSWGAEGQRPGFGYGGRASDYKSAHKGFKGVDAQGTLSKIFKLGGRDSRSGSPM	MBP	P02686	MAD	-1	0	FALSE
HTP0092B	Plasma	SciLifeLab peptide array	MORC3_HPRR2280025	NNPDPQFRNCEVPEEPEDEDLVHPTYEKTYKKTNKEKFRIRQPEMIPRINAELLFRPTALSTPSFSSPKESVPRRHLSEGTNSYATRLLNNHQVPPQSEPESNSLKRR	MORC3	Q14149	MAD	-1	4	FALSE
HTP0092B	Plasma	SciLifeLab peptide array	MORC3_HPRR2890077	GKKGTRIIIWNLRSYKNATEFDFEKDKYDIRIPEDLDEITGKKGYKKQERMDQIAPESDYSLRAYCSILYLKPRMQIILR	MORC3	Q14149	MAD	1	2	FALSE
HTP0092B	Plasma	SciLifeLab peptide array	MPO_HPRR280052	SRDHGLPGYNAWRRFCGLPQPETVGQLGTVLRNLKLARKLMEQYGTPNNIDIWMGGVSEPLKRKGRVGPLLACIIGTQFRKLRDGDRFWWENEGVFSMQQRQALAQISLPRIICDNTGITTVSKNNIFMSNSYPRDFVNC	MPO	P05164	MAD	0	1	FALSE
HTP0092B	Plasma	SciLifeLab peptide array	MPO_HPRR4160030	GAAPAVLGEVDTSLVLSSMEEAKQLVDKAYKERRESIKQRLR	MPO	P05164	MAD	-1	5.2	FALSE
HTP0092B	Plasma	SciLifeLab peptide array	MUSK_HPRR2750111	YYGMAHEEVIYYVRDGNILSCPENCPVELYNLMRLCWSKLPADRPSFTSIHRILERMCERAEGTVSV	MUSK	O15146	MAD	2	2	FALSE
HTP0092B	Plasma	SciLifeLab peptide array	MUSK_HPRR2750113	PKAPVITTPLETVDALVEEVATFMCAVESYPQPEISWTRNKILIKLFDTRYSIRENGQLLTILSVEDSDDGIYCCTANNGVGGAVESCGALQVKMKPKITR	MUSK	O15146	MAD	1	1	FALSE
HTP0092B	Plasma	SciLifeLab peptide array	MUSK_HPRR290005	RGEVCNAVLAKDALVFLNTSYADPEEAQELLVHTAWNELKVVSPVCRPAAEALLCNHIFQECSPGVVPTPIPICREYCLAVKELFCAKEWLVMEEKTHRGLYRSEMHLLSVPECSKLPSMHWDPTACARLPHLAFPPMTSSK	MUSK	O15146	MAD	-1	-1	FALSE
HTP0092B	Plasma	SciLifeLab peptide array	MUSK_HPRR4160302	RESAAVTLTTLPSELLLDRLHPNPMYQRMPLLLNPKLLSLEYPRNNIEYVRDIGEGAFGRVFQARAPGLLP	MUSK	O15146	MAD	0	2	FALSE
HTP0092B	Plasma	SciLifeLab peptide array	MUSK_HPRR4160303	RIHNVQKEDAGQYRCVAKNSLGTAYSKVVKLEVEVFARILRAPESHNVTFGSFVTLHCTATGIPVPTITWIENGNA	MUSK	O15146	MAD	1	3.1	FALSE
HTP0092B	Plasma	SciLifeLab peptide array	MYH10_HPRR3460173	RQLDDATEANEGLSREVSTLKNRLRRGGPISFSSSRSGRRQLHLEGASLELSDDDTESKTSDVNETQPPQ	MYH10	P35580	MAD	-2	6.1	FALSE
HTP0092B	Plasma	SciLifeLab peptide array	MYH10_HPRR3890677	VQELHAKVSEGDRLRVELAEKASKLQNELDNVSTLLEEAEKKGIKFAKDA	MYH10	P35580	MAD	34	63.6	FALSE
HTP0092B	Plasma	SciLifeLab peptide array	MYH11_HPRR1720012	VTVLKKALDEETRSHEAQVQEMRQKHAQAVEELTEQLEQFKRAKANLDKNKQTLEKENADLAGELRVLGQAKQEVEHKKKKLEAQVQELQSKCSDGE	MYH11	P35749	MAD	-1	3	FALSE
HTP0092B	Plasma	SciLifeLab peptide array	MYH11_HPRR1720013	LQEETRQKLNVSTKLRQLEEERNSLQDQLDEEMEAKQNLERHISTLNIQLSDSKKKLQDFASTVEALEEGKKRFQKEIENLTQQYEEK	MYH11	P35749	MAD	12	12	FALSE
HTP0092B	Plasma	SciLifeLab peptide array	MYH13_HPRR4080014	DNKEMYVKGMIQTRENDKVIVKTLDDRMLTLNNDQVFPMN	MYH13	Q9UKX3	MAD	16	48.5	FALSE
HTP0092B	Plasma	SciLifeLab peptide array	MYH14_HPRR3830109	GAGEQLKADLLLEPCSHYRFLTNGPSSSPGQERELFQETLESLRVLGFSHEE	MYH14	Q7Z406	MAD	1	4.1	FALSE
HTP0092B	Plasma	SciLifeLab peptide array	MYH14_HPRR4290008	FTTRTVRQVFRLEEGVASDEEAEEAQPGSGPSPEPEGSPP	MYH14	Q7Z406	MAD	-1	0	FALSE
HTP0092B	Plasma	SciLifeLab peptide array	MYH15_HPRR2960342	KMERERADLTQDLADLNERLEEVGGSSLAQLEITKKQETKFQKLHRDMEEATLHFETTSASLKKRH	MYH15	Q9Y2K3	MAD	1	5	FALSE
HTP0092B	Plasma	SciLifeLab peptide array	MYH15_HPRR2960343	LGEAAAFLRRSEAELLLLQATALDGKKKCWIPDGENAYIEAEVKGSEDDGTVIVETADGESLSIKEDKIQQMNPPEFE	MYH15	Q9Y2K3	MAD	-2	1.2	FALSE
HTP0092B	Plasma	SciLifeLab peptide array	MYH3_HPRR2500234	IEAQNQPFDAKTYCFVVDSKEEYAKGKIKSSQDGKVTVETEDNRTLVVKPEDVYAMNPPKFDRIEDMAML	MYH3	P11055	MAD	-1	6.2	FALSE
HTP0092B	Plasma	SciLifeLab peptide array	MYH6*_HPRR141341	QVEEDKVNSLSKSKVKLEQQVDDLEGSLEQEKKVRMDLERAKRKLEGDLKLTQESIMDLENDKLQLEEKLKKKEFDINQQNSKIEDEQVLALQLQKKLKENQARIEELEEELEAERTARAKVEKLRSDLSRELEEISERLEEA	MYH6*	P13533;P12883;P13535;Q9Y623;P12882;Q9UKX2	MAD	0	10.3	FALSE
HTP0092B	Plasma	SciLifeLab peptide array	MYH6*_HPRR141342	ALRKKHADSVAELGEQIDNLQRVKQKLEKEKSEFKLELDDVTSNMEQIIKAKANLEKMCRTLEDQMNEHRSKAEETQRSVNDLTSQRAKLQTENGELSRQLDEKEALISQLTRGKLTYTQQLEDLKRQLEEEVKAKNALAHALQS	MYH6*	P13533;P12883	MAD	2	9.1	FALSE
HTP0092B	Plasma	SciLifeLab peptide array	MYH6*_HPRR4370083	LDKKQRNFDKILAEWKQKCEETHAELEA	MYH6*	P13533;P12883;Q9UKX3;P13535;Q9Y623;P12882;Q9UKX2;P11055	MAD	2	2	FALSE
HTP0092B	Plasma	SciLifeLab peptide array	MYH7B_HPRR3300035	KVHTIPWDGKKRVWVPDEQDAYVEAEVKSEATGGRVTVETKDQKVLMVREAELQPMNPPRFDLLEDMAMM	MYH7B	A7E2Y1	MAD	6	18.3	FALSE
HTP0092B	Plasma	SciLifeLab peptide array	MYH7B_HPRR3300036	DMSGNKRGSRASCPHRGAECLLPWAALNLQGFQLLLLHPSATAMMDVSELGESARYLRQGYQEMTK	MYH7B	A7E2Y1	MAD	1	1	FALSE
HTP0092B	Plasma	SciLifeLab peptide array	MYH9_HPRR350143	REQEVNILKKTLEEEAKTHEAQIQEMRQKHSQAVEELAEQLEQTKRVKANLEKAKQTLENERGELANEVKVLLQGKGDSEHKRKKVEAQLQELQVKFNEGERVRTELADKVTKLQVELDNVTGLLSQSDSKSSKLTKDF	MYH9	P35579	MAD	-2	2.1	FALSE
HTP0092B	Plasma	SciLifeLab peptide array	NARS_HPRR3120288	RLEDLVCDVVDRILKSPAGSIVHELNPNFQPPKRPFKRMNYSDAIVWLKEHDVKKEDGTFYEFGEDIPEAPERLMTDTINEPILLCRFPVEIK	NARS	O43776	MAD	2	3.1	FALSE
HTP0092B	Plasma	SciLifeLab peptide array	NARS_HPRR3120291	GALEGYRGQRVKVFGWVHRLRRQGKNLMFLVLRDGTGYLQCVLADELCQCYNGVLLSTESSVAVYGMLNLTPKGKQAPGGHELSCDFWELIG	NARS	O43776	MAD	3	3	FALSE
HTP0092B	Plasma	SciLifeLab peptide array	NARS2_HPRR370132	LAEFYMIEAEISFVDSLQDLMQVIEELFKATTMMVLSKCPEDVELCHKFIAPGQKDRLEHMLKNNFLIISYTEAVEILKQASQNFTFTPEWGADLRTEHEKYLVKHCGNIPVFVINYPLTLKPFYMRDNEDGPQHTVAAVDLLVPGVG	NARS2	Q96I59	MAD	-2	-1	FALSE
HTP0092B	Plasma	SciLifeLab peptide array	NCOA2_HPRR3760125	SPRMAHTQSPMMQQSQANPAYQAPSDINGWAQGNMGGNSMFSQQSPPHFGQQANTSMYSNNMNINVSMATNTGGMSSMNQMTGQISMTSVT	NCOA2	Q15596	MAD	1	1.1	FALSE
HTP0092B	Plasma	SciLifeLab peptide array	NCOA2_HPRR3760127	PKLERLDSKTDPASNTKLIAMKTEKEEMSFEPGDQPGSELDNLEEILDDLQNSQLPQLFPDTRPGAPAGSV	NCOA2	Q15596	MAD	6	38.4	FALSE
HTP0092B	Plasma	SciLifeLab peptide array	NKX6-1_HPRR3060095	PLGTHNPGGLKPPATGGLSSLGSPPQQLSAATPHGINDILSRPSM	NKX6-1	P78426	MAD	0	2	FALSE
HTP0092B	Plasma	SciLifeLab peptide array	NLRP5_HPRR3280206	LLPESFLIVTVRDVGTEKLKSEVVSPRYLLVRGISGEQRIHLLLERGIGEHQKTQGLRAIMNNRELLDQCQVPAVGSLICVALQLQDVVGESVAPFNQTLTGLHAAFVFHQLTPR	NLRP5	P59047	MAD	0	0	FALSE
HTP0092B	Plasma	SciLifeLab peptide array	NUP210_HPRR2110161	DLIHDIQIVSTTRELYLEDSPLELKIQALDSEGNTFSTLAGLVFEWTIVKDSEADRFSDSHNALRILTFLESTYIPPSYISEMEKAAKQGDTILVSGMKTGSSKLKARIQEAVYKNVRPAEVRLLILENILLNPAYDVYLMVGTSIHYK	NUP210	Q8TEM1	MAD	3	2.1	TRUE
HTP0092B	Plasma	SciLifeLab peptide array	NUP210_HPRR2110162	TFTVHFHDNSGDVFHAHSSVLNFATNRDDFVQIGKGPTNNTCVVRTVSVGLTLLRVWDAEHPGLSDFMPLPVLQAISPELSGAMVVGDVLCLATVLTSLEGLSGTWSSSANSILHIDPKTGVAV	NUP210	Q8TEM1	MAD	-1	-1	FALSE
HTP0092B	Plasma	SciLifeLab peptide array	NUP210_HPRR3890586	HLHPIQTSFQEATASKVIVAVGDRSSNLRGECTPTQREVIQALHPETLISCQSQFKPAVFDFPSQDVFTVEPQFDTALGQYFCSITMHRLTDKQRKHL	NUP210	Q8TEM1	MAD	2	5.1	FALSE
HTP0092B	Plasma	SciLifeLab peptide array	NUP62_HPRR1430027	GGFTFGTAKTATTTPATGFSFSTSGTGGFNFGAPFQPATSTPSTGLFSLATQTPATQTTGFTFGTATLASGGTGFSLGIGASKLNLSNTAATPAMANPSGFGLGSSNLTNAISSTVTSSQGTAPTGFVFGPST	NUP62	P37198	MAD	0	2	FALSE
HTP0092B	Plasma	SciLifeLab peptide array	OGDH_HPRR2440198	LRTCAAKLRPLTASQTVKTFSQNRPAAARTFQQIRCYSAPVAAEPFLSGTSSNYVEEMYCAWLENPKSV	OGDH	Q02218	MAD	-1	0.1	FALSE
HTP0092B	Plasma	SciLifeLab peptide array	OGDH_HPRR2440199	FRNTNAGAPPGTAYQSPLPLSRGSLAAVAHAQSLVEAQPNVDKLVEDHLAVQSLIRAYQIRGHHVAQ	OGDH	Q02218	MAD	-1	1	FALSE
HTP0092B	Plasma	SciLifeLab peptide array	PAGE2B*_HPRR3340273	QGIAPSGEIENEGAPAVQGPDMEAFQQELALLKIEDEPGDGPDVREGIMPTFDLTKVLEAGDA	PAGE2B*	Q5JRK9;Q7Z2X7;Q96GU1	MAD	-1	6.3	FALSE
HTP0092B	Plasma	SciLifeLab peptide array	PAGE2B*_HPRR3340274	RSQSSERGNDQESSQPVGSVIVQEPTEEKRQEEEPPTDN	PAGE2B*	Q5JRK9;Q7Z2X7;Q96GU1	MAD	-1	14.1	FALSE
HTP0092B	Plasma	SciLifeLab peptide array	PAGE5_HPRR3920178	PWAGNRGWAGTREEVRDMSEHVTRSQS	PAGE5	Q96GU1	MAD	-1	12.3	FALSE
HTP0092B	Plasma	SciLifeLab peptide array	PDHA1*_HPRR3340143	NDATFEIKKCDLYLLEEGPPVTTVLTR	PDHA1*	P08559;P29803	MAD	8	2	TRUE
HTP0092B	Plasma	SciLifeLab peptide array	PDHA1*_HPRR3340144	ILAELTGRRGGCAKGKGGSMHMYTKNFYGGNGIVG	PDHA1*	P08559;P29803	MAD	0	1	FALSE
HTP0092B	Plasma	SciLifeLab peptide array	PDHA1*_HPRR3340146	YCRSGKGPILMELQTYRYHGHSMSDPGVS	PDHA1*	P08559;P29803	MAD	-1	0	FALSE
HTP0092B	Plasma	SciLifeLab peptide array	PDHX_HPRR3050163	PAARNILEKHSLDASQGTATGPRGIFTKEDALKLVQLKQTGKITESRPTPAPTATPTAPSPLQATAGPSYPRPVIPPVSTPGQPNAVGTFTEI	PDHX	O00330	MAD	-2	0	FALSE
HTP0092B	Plasma	SciLifeLab peptide array	PDHX_HPRR3050164	DASDDGILAKIVVEEGSKNIRLGSLIGLIVEEGEDWKHVEIPKDVGPPPPVSKPSEPRPSPEPQISIPVKKEHIPGTLRFRLS	PDHX	O00330	MAD	-1	22.4	FALSE
HTP0092B	Plasma	SciLifeLab peptide array	PDX1_HPRR3930003	DISPYEVPPLADDPAVAHLHHHLPAQLALPHPPAGPFPEGAEPGVLEEPNRVQLPFPWMKSTKA	PDX1	P52945	MAD	8	30.2	FALSE
HTP0092B	Plasma	SciLifeLab peptide array	PLP1_HPRR4180637	IYFNTWTTCQSIAFPSKTSASIGSLCADARMYGVLPWNAFPGK	PLP1	P60201	MAD	0	0	FALSE
HTP0092B	Plasma	SciLifeLab peptide array	PPY_HPRR2500214	EPVYPGDNATPEQMAQYAADLRRYINMLTRPRYGKRHKEDTLAFSEWGSPHAAVPRELSPLDL	PPY	P01298	MAD	0	2	FALSE
HTP0092B	Plasma	SciLifeLab peptide array	PROC_HPRR330193	DQCLVLPLEHPCASLCCGHGTCIDGIGSFSCDCRSGWEGRFCQREVSFLNCSLDNGGCTHYCLEEVGWRRCSCAPGYKLGDDLLQCHPAVKFPCGRPWKRMEKKRSHLKRDTEDQEDQVDPRLIDGKMTRRGDSPWQVVLLD	PROC	P04070	MAD	1	2	FALSE
HTP0092B	Plasma	SciLifeLab peptide array	PROC_HPRR330194	AHCMDESKKLLVRLGEYDLRRWEKWELDLDIKEVFVHPNYSKSTTDNDIALLHLAQPATLSQTIVPICLPDSGLAERELNQAGQETLVTGWGYHSSREKEAKRNRTFVLNFIKIPVVPHNECSEVMSNMVSENMLCAGI	PROC	P04070	MAD	-1	4	FALSE
HTP0092B	Plasma	SciLifeLab peptide array	PRPH_HPRR3070455	FSSTSYRRTFGPPPSLSPGAFSYSSSSRFSSSRLLGSASPSSSVRLGSFRSPRAGAGALLRLPSERLDFSMAEALNQEFLATRSNEKQEL	PRPH	P41219	MAD	-1	0	FALSE
HTP0092B	Plasma	SciLifeLab peptide array	PRPH_HPRR3890753	EESRISVPVHSFASLNIKTTVPEVEPPQDSHSRKTVLIKTI	PRPH	P41219	MAD	18	179.2	FALSE
HTP0092B	Plasma	SciLifeLab peptide array	PRTN3_HPRR400125	PTQQHFSVAQVFLNNYDAENKLNDILLIQLSSPANLSASVATVQLPQQDQPVPHGTQCLAMGWGRVGAHDPPAQVLQELNVTVVTFFCRPHNICTFVPRRKAGICFGDSGGPLICDGI	PRTN3	P24158	MAD	2	3	FALSE
HTP0092B	Plasma	SciLifeLab peptide array	PSMA3_HPRR4320279	TGYDLSASTFSPDGRVFQVEYAMKAVENSSTAIGIRCKDGVVFGVEKLVLSKLYEEGSNKRLFNVDRHVGMAVAGLLADAR	PSMA3	P25788	MAD	0	1	FALSE
HTP0092B	Plasma	SciLifeLab peptide array	PTGER3_HPRR1960004	MKETRGYGGDAPFCTRLNHSYTGMWAPERSAEARGNLTRPPGSGEDCGSVS	PTGER3	P43115	MAD	-1	2	FALSE
HTP0092B	Plasma	SciLifeLab peptide array	PTGER3_HPRR4160226	RKILLRKFCQIRYHTNNYASSSTSLPCQCSSTLMWSDHLER	PTGER3	P43115	MAD	1	2	FALSE
HTP0092B	Plasma	SciLifeLab peptide array	PTGS1_HPRR330080	MPDSFKVGSQEYSYEQFLFNTSMLVDYGVEALVDAFSRQIAGRIGGGRNMDHHILHVAVDVIRESREMRLQPFNEYRKRFGMKPYTSFQELVGEKEMAAELEELYGDIDALEFYPGLLLEKCHPNSIFGESMIEIGAPFSLKGLLGN	PTGS1	P23219	MAD	0	6	FALSE
HTP0092B	Plasma	SciLifeLab peptide array	PTPRN_HPRR1350005	VSSEPPKAARPPVTPVLLEKKSPLGQSQPTVAGQPSARPAAEEYGYIVTDQNVVGPALTFRIRHNEQNLSLADVTQQAGLVKSELEAQTGLQILQTGVGQREEAAAVLPQTAHSTSPM	PTPRN	Q16849	MAD	-2	1.1	FALSE
HTP0092B	Plasma	SciLifeLab peptide array	PTPRN_HPRR4160144	QVTSPVLQRLQGVLRQLMSQGLSWHDDLTQYVISQEMERIPRLRPPEPRPRDRSGLAPKRPGPAGELLLQDIPTGSAPAAQHRL	PTPRN	Q16849	MAD	-1	2	FALSE
HTP0092B	Plasma	SciLifeLab peptide array	PTPRN2_HPRR1350080	QDDDDRLYQEVHRLSATLGGLLQDHGSRLLPGALPFARPLDMERKKSEHPESSLSSEEETAGVENVKSQTYSKDLLGQQPHSEPGAAAFGELQNQMPGPSKEEQSLPAGAQ	PTPRN2	Q92932	MAD	-1	3.1	FALSE
HTP0092B	Plasma	SciLifeLab peptide array	PTPRN2_HPRR1350081	RFSESILTYVAHTSALTYPPGSRTQLREDLLPRTLGQLQPDELSPKVDSGVDRHHLMAALSAYAAQRPPAPPGEGSLEPQYLLRAPSRMPRPLLAPAAPQKWPSPLGDSEDPSST	PTPRN2	Q92932	MAD	-1	11.1	FALSE
HTP0092B	Plasma	SciLifeLab peptide array	RAB3D*_HPRR4320449	AVQDWATQIKTYSWDNAQVILVGNKCD	RAB3D*	O95716;P20336;P20337;Q96E17	MAD	0	1	FALSE
HTP0092B	Plasma	SciLifeLab peptide array	RAB3D_HPRR2260029	EASAKENINVKQVFERLVDVICEKMNESLEPSSSSGSNGKGPAVGDAPAPQPSSCSC	RAB3D	O95716	MAD	0	33	FALSE
HTP0092B	Plasma	SciLifeLab peptide array	RAPSN_HPRR3050586	TKVLEKSSDLMGRFRVLGCLVTAHSEMGRYKEMLKFAVVQIDTARELEDADFLLESYLNLARSNEKLCEFHKTISYCKTC	RAPSN	Q13702	MAD	2	2	FALSE
HTP0092B	Plasma	SciLifeLab peptide array	RAPSN_HPRR3050587	SLSMGNAFLGLSVFQKALESFEKALRYAHNNDDAMLECRVCCSLGSFYAQVKDYEKALFFPCKAAELVNNYGKGWSLKYRAMS	RAPSN	Q13702	MAD	0	0	FALSE
HTP0092B	Plasma	SciLifeLab peptide array	RAPSN_HPRR3050588	MECCEESMKIALQHGDRPLQALCLLCFADIHRSRGDLETAFPRYDSAMSIMTEIGNRLGQVQALLGVAKCWVARKALDKALDAIE	RAPSN	Q13702	MAD	1	1	FALSE
HTP0092B	Plasma	SciLifeLab peptide array	RARS_HPRR620009	VVLGEDKKKFKTRSGETVRLMDLLGEGLKRSMDKLKEKERDKVLTAEELNAAQTSVAYGCIKYADLSHNRLNDYIFSFDKMLDDRGNTAAYLLYAFTRIRSIARLANIDEEMLQKAARETKILLDHEKEWKLGRCILRFPEI	RARS	P54136	MAD	1	2	FALSE
HTP0092B	Plasma	SciLifeLab peptide array	REG1B*_HPRR3320001	TDDFNVWIGLHDPKKNRRWHWSSGSLVSYKSWG	REG1B*	P48304;P05451	MAD	0	3.1	FALSE
HTP0092B	Plasma	SciLifeLab peptide array	REG1B*_HPRR3320002	PEGTNAYRSYCYYFNEDRETWVDADLYCQNMNSGNLVSV	REG1B*	P48304;P05451	MAD	34	13.8	TRUE
HTP0092B	Plasma	SciLifeLab peptide array	RHD*_HPRR3980079	LNLKIWKAPHVAKYFDDQVFWKFPHLAVGF	RHD*	Q02161;P18577	MAD	0	2	FALSE
HTP0092B	Plasma	SciLifeLab peptide array	RHD*_HPRR4080111	AILLDGFLSQFPSGKVVITLFSIRL	RHD*	Q02161;P18577	MAD	1	2	FALSE
HTP0092B	Plasma	SciLifeLab peptide array	RHD_HPRR2870121	VGFSKSIQEKQGLFKNKTTSSHCCLHLYVRNAHDSKVSNVRAGTGVRENGVESFLCHSLRRISPFIMHC	RHD	Q02161	MAD	0	1.1	FALSE
HTP0092B	Plasma	SciLifeLab peptide array	RPL6_HPRR3720353	VPRKLLSHGKKPFSQHVRKLRASITPGTILIILTGRHRGKRVVFLKQLASGLLL	RPL6	Q02878	MAD	-1	-1	FALSE
HTP0092B	Plasma	SciLifeLab peptide array	RPL6_HPRR580003	LRASITPGTILIILTGRHRGKRVVFLKQLASGLLLVTGPLVLNRVPLRRTHQKFVIATSTKIDISNVKIPKHLTDAYFKKKKLRKPRHQEGEIFDTEKEKYEITEQRKIDQKAVDSQILPKIKAIPQLQGYLRSVFALTNGIYPH	RPL6	Q02878	MAD	1	7	FALSE
HTP0092B	Plasma	SciLifeLab peptide array	RPLP0_HPRR580058	VVLMGKNTMMRKAIRGHLENNPALEKLLPHIRGNVGFVFTKEDLTEIRDMLLANKVPAAARAGAIAPCEVTVPAQNTGLGPEKTSFFQALGIT	RPLP0	P05388	MAD	1	2.1	FALSE
HTP0092B	Plasma	SciLifeLab peptide array	RPLP1_HPRR580030	MASVSELACIYSALILHDDEVTVTEDKINALIKAAGVNVEPFWPGLFAKALANVNIGSLICNVGAGGPAPAAGAAPAGGPAPSTAAAPAEEKKVEAKKEESEESDDDMG	RPLP1	P05386	MAD	0	1	FALSE
HTP0092B	Plasma	SciLifeLab peptide array	RPLP2_HPRR3830386	MRYVASYLLAALGGNSSPSAKDIKKILDSVGIEADDDRLNKVIS	RPLP2	P05387	MAD	-1	0	FALSE
HTP0092B	Plasma	SciLifeLab peptide array	RPLP2_HPRR4290615	SELNGKNIEDVIAQGIGKLASVPAGGAVAVSAAPGSAAP	RPLP2	P05387	MAD	0	5.3	FALSE
HTP0092B	Plasma	SciLifeLab peptide array	RYR1_HPRR3420763	REFLHNNLHLQGKVEGSPSLRWQMALYRGVPGREEDADDPEKIVRRVQEVSAVLYYLDQTEHPYKSKK	RYR1	P21817	MAD	0	0	FALSE
HTP0092B	Plasma	SciLifeLab peptide array	SAE1_HPRR3280030	NSIKFFTGDVFGYHGYTFANLGEHEFVEEKTKVAKVSQGVEDGPDTKRAKLDSSETTMVKKKVVFCPVKEALE	SAE1	Q9UBE0	MAD	3	3	FALSE
HTP0092B	Plasma	SciLifeLab peptide array	SAE1_HPRR3280031	KGLTMLDHEQVTPEDPGAQFLIRTGSVGRNRAEASLERAQNLNPMVDVKVDTEDIEKKPESFFTQFDAVCLTCCSRD	SAE1	Q9UBE0	MAD	1	23.4	FALSE
HTP0092B	Plasma	SciLifeLab peptide array	SARS_HPRR1390005	NVLSFDDLTADALANLKVSQIKKVRLLIDEAILKCDAERIKLEAERFENLREIGNLLHPSVPISNDEDVDNKVERIWGDCTVRKKYSHVDLVVMVDGFEGEKGAVVAGSRGYFLKGVLVFLEQALIQYAL	SARS	P49591	MAD	1	3	FALSE
HTP0092B	Plasma	SciLifeLab peptide array	SARS_HPRR4160317	GSRGYIPIYTPFFMRKEVMQEVAQLSQFDEELYKVIGKGSEKSDDNSYDEKYLIATSEQPIAALHRDEWLRPEDLPIKYAGLSTCFRQ	SARS	P49591	MAD	1	5.1	FALSE
HTP0092B	Plasma	SciLifeLab peptide array	SIAH2_HPRR1450566	QPQHTPSPQHHELTSLFECPVCFDYVLPPILQCQAGHLVCNQCRQKLSCCP	SIAH2	O43255	MAD	2	2	FALSE
HTP0092B	Plasma	SciLifeLab peptide array	SIAH2_HPRR4040718	TGPSANKPCSKQPPPQPQHTPSPA	SIAH2	O43255	MAD	4	158.8	FALSE
HTP0092B	Plasma	SciLifeLab peptide array	SLC14A1_HPRR4030315	MNGRSLIGGAGDARHGPVWKDPFGTKAGDAARRGIARLSLALADGSQEQE	SLC14A1	Q13336	MAD	-1	1	FALSE
HTP0092B	Plasma	SciLifeLab peptide array	SLC14A1_HPRR4030316	GHYNPFFPAKLVIPITTAPNISWSDLSALELLKSIPVGVGQI	SLC14A1	Q13336	MAD	-1	1	FALSE
HTP0092B	Plasma	SciLifeLab peptide array	SLC26A4_HPRR2440187	FGLLTVVLRVQFPSWNGLGSIPSTDIYKSTKNYKNIEEPQGVKILRFSSPIFYGNVDGFKKCIKSTVGFDAIRVYNKRLKALRK	SLC26A4	O43511	MAD	-2	-1	FALSE
HTP0092B	Plasma	SciLifeLab peptide array	SLC26A4_HPRR2440190	IEKLEQCGFFDDNIRKDTFFLTVHDAILYLQNQVKSQEGQGSILETITLIQDCKDTLELIETELTEEELDVQDE	SLC26A4	O43511	MAD	-2	-1	FALSE
HTP0092B	Plasma	SciLifeLab peptide array	SLC26A4_HPRR3870179	QLPEYSCSYMVSRPVYSELAFQQQHERRLQERKTLRESLAKCCSCSRKRAFGVLKTLVPILE	SLC26A4	O43511	MAD	1	2	FALSE
HTP0092B	Plasma	SciLifeLab peptide array	SLC30A8_HPRR2180114	MEFLERTYLVNDKAAKMYAFTLESVELQQKPVNKDQCPRERPEELESGGMYHCHSGSKPTEKGANEYAYAKWK	SLC30A8	Q8IWU4	MAD	2	19.2	FALSE
HTP0092B	Plasma	SciLifeLab peptide array	SLC30A8_HPRR3970264	LHQRCLGHNHKEVQANASVRAA	SLC30A8	Q8IWU4	MAD	0	1	FALSE
HTP0092B	Plasma	SciLifeLab peptide array	SLC30A8_HPRR3970265	LSAHVATAASRDSQVVRREIAKALSKSFTMHSLTIQMESPVDQDPDCLFCEDPCD	SLC30A8	Q8IWU4	MAD	2	6	FALSE
HTP0092B	Plasma	SciLifeLab peptide array	SNRPB*_HPRR400172	TFKAFDKHMNLILCDCDEFRKIKPKNAKQPEREEKRVLGLVLLRGENLVSMTVEGPPPKDTGIARVPLAGAAGGPGVGRAAGRGVPAGVPIPQ	SNRPB*	P14678;P63162	MAD	1	2	FALSE
HTP0092B	Plasma	SciLifeLab peptide array	SNRPB*_HPRR4320676	QAPAGLAGPVRGVGGPSQQVMTPQGRGT	SNRPB*	P14678;P63162	MAD	-1	1.1	FALSE
HTP0092B	Plasma	SciLifeLab peptide array	SNRPD1_HPRR3120151	SMNTHLKAVKMTLKNREPVQLETLSIRGNNIRYFILPDSLPLDTLLVDVEPKVKSKKREAVAGRGR	SNRPD1	P62314	MAD	-1	1.1	FALSE
HTP0092B	Plasma	SciLifeLab peptide array	SNRPD1_HPRR4000134	MKLVRFLMKLSHETVTIELKNGTQVHGTITGVDVS	SNRPD1	P62314	MAD	5	10.1	FALSE
HTP0092B	Plasma	SciLifeLab peptide array	SNRPD2_HPRR3250190	GKGKKKSKPVNKDRYISKMFLRGDSVIVVLRNPLIAGK	SNRPD2	P62316	MAD	-1	0	FALSE
HTP0092B	Plasma	SciLifeLab peptide array	SNRPD2_HPRR3250191	REEEEFNTGPLSVLTQSVKNNTQVLINCRNNKKLLGRVKAFDRHCNMVLENVKEMWTE	SNRPD2	P62316	MAD	0	1	FALSE
HTP0092B	Plasma	SciLifeLab peptide array	SNRPD3_HPRR220243	KVLHEAEGHIVTCETNTGEVYRGKLIEAEDNMNCQMSNITVTYRDGRVAQLEQVYIRGSKIRFLILPDMLKNAPMLKSMKNKNQGSGAGRGKAAILKAQVAARGRGRGMGRGNI	SNRPD3	P62318	MAD	0	1.1	FALSE
HTP0092B	Plasma	SciLifeLab peptide array	SNRPF_HPRR1720018	LNPKPFLNGLTGKPVMVKLKWGMEYKGYLVSVDGYMNMQLANTEEYIDGALSGHLGEVLIRCNNVLYIRGVEEEEEDG	SNRPF	P62306	MAD	0	9.1	FALSE
HTP0092B	Plasma	SciLifeLab peptide array	SNRPG_HPRR3400115	MSKAHPPELKKFMDKKLSLKLNGGRHVQGILRGFDPFMNLVIDECVEMATSGQQNNIGMVVIRGNSIIMLEALE	SNRPG	P62308	MAD	0	0.1	FALSE
HTP0092B	Plasma	SciLifeLab peptide array	SOX10_HPRR3830104	YSAAGYGLGSALAVASGHSAWISKPPGVALPTVSPPGVDAKAQVKTETA	SOX10	P56693	MAD	2	13	FALSE
HTP0092B	Plasma	SciLifeLab peptide array	SOX13_HPRR3410162	QDARQLLHSHSGALDGSPNTPFRKDLISLDSSPAKERLEDGCVHPLEEAMLSCDMDGSRHFPESRNSSHI	SOX13	Q9UN79	MAD	0	3	FALSE
HTP0092B	Plasma	SciLifeLab peptide array	SOX13_HPRR3410163	DVLYPRAAGMPLAQPLVEHYVPRSLDPNMPVIVNTCSLREEGEGTDDRHSVADGEMYRYSEDEDSEGEEKSDGELVVLT	SOX13	Q9UN79	MAD	-1	3	FALSE
HTP0092B	Plasma	SciLifeLab peptide array	SOX9_HPRR360171	SQRTHIKTEQLSPSHYSEQQQHSPQQIAYSPFNLPHYSPSYPPITRSQYDYTDHQNSSSYYSHAAGQGTGLYSTFTYMNPAQRPMYTPIADTSGVPSIPQTHSPQHWEQPVYTQLTR	SOX9	P48436	MAD	-1	1.1	FALSE
HTP0092B	Plasma	SciLifeLab peptide array	SOX9_HPRR4180522	PFMKMTDEQEKGLSGAPSPTMSEDSAGSPCPSGSGSDTENTRPQENTFPKGEPDLKKESEEDKF	SOX9	P48436	MAD	-1	8.2	FALSE
HTP0092B	Plasma	SciLifeLab peptide array	SP100_HPRR2240001	YKGFENVIHDKLPLQESEEEEREERSGLQLSLEQGTGENSFRSLTWPPSGSPSHAGTTPPENGLSEHPCETEQINAKRKDTTSDKDDSLGSQQTNEQCAQKAEPTESCEQIAVQVNNGDAGREMPCPL	SP100	P23497	MAD	-1	2.5	FALSE
HTP0092B	Plasma	SciLifeLab peptide array	SP100_HPRR2240002	QARTHHNQASDIIVISSEDSEGSTDVDEPLEVFISAPRSEPVINNDNPLESNDEKEGQEATCSRPQIVPEPMDFRKLSTFRESFKKRVIGQDHDFSESSE	SP100	P23497	MAD	24	1	TRUE
HTP0092B	Plasma	SciLifeLab peptide array	SP140_HPRR1450089	SELEKTFGWSHLEALFSRINLMAYPDLNEIYRSFQNVCYEHSPLQMNNVNDLEDRPRLLPYGKQENSNACHEMDDIAVPQEALSSSPRCEPGFSSESCEQLALPKAGGGDAEDAPSLLPGGGVSCKLAIQIDEGESEEMPKLLP	SP140	Q13342	MAD	0	4.2	FALSE
HTP0092B	Plasma	SciLifeLab peptide array	SP140_HPRR4160718	LSLLPGEGEEGSDDCSEMCDGEERQEASSSLARRGSVSSELENHPMNEEGESEELASSLLYDNVPGAEQSA	SP140	Q13342	MAD	-1	2	FALSE
HTP0092B	Plasma	SciLifeLab peptide array	SRP14_HPRR2870077	GTVEGFEPADNKCLLRATDGKKKISTVVSSKEVNKFQMAYSNLLRANMDGLKKRDKKNKTKKTKAAAAA	SRP14	P37108	MAD	-1	0	FALSE
HTP0092B	Plasma	SciLifeLab peptide array	SRP14_HPRR3930096	MVLLESEQFLTELTRLFQKCRTSGSVYITLKKYDGRTKPIPKK	SRP14	P37108	MAD	0	1	FALSE
HTP0092B	Plasma	SciLifeLab peptide array	SRP19_HPRR2870087	DVQYRGRVRVQLKQEDGSLCLVQFPSRKSVMLYAAEMIPKLKTRTQKTGGADQSLQQGEGSK	SRP19	P09132;Q15695	MAD	3	3	FALSE
HTP0092B	Plasma	SciLifeLab peptide array	SRP19_HPRR2870088	DQDRFICIYPAYLNNKKTIAEGRRIPISKAVENPTATEIQDVCSAVGLNVFLEKNKMYSREWNR	SRP19	P09132;Q15695	MAD	0	2	FALSE
HTP0092B	Plasma	SciLifeLab peptide array	SRP54_HPRR3720460	VIIASEGVEKFKNENFEIIIVDTSGRHKQEDSLFEEMLQVANAIQPDNIVYVMDASIGQACEAQAKAFKDKVDVASVIVT	SRP54	P61011	MAD	1	4.1	FALSE
HTP0092B	Plasma	SciLifeLab peptide array	SRP54_HPRR3720461	SALRSLSNATIINEEVLNAMLKEVCTALLEADVNIKLVKQLRENVKSAIDLEEMASGLNKRKMIQHAVFKELVKLVDPGVKAWTPTKGKQNV	SRP54	P61011	MAD	0	2	FALSE
HTP0092B	Plasma	SciLifeLab peptide array	SRP68_HPRR2500803	AESEETKERLFESMLSECRDAIQVVREELKPDQKQRDYILEGEPGKVSNLQYLHSYLTYIKLSTAIKRNENMAKGLQRALLQQQPEDDSKRSPRPQDLIRLYDIILQNLVELL	SRP68	Q9UHB9	MAD	-2	-2	FALSE
HTP0092B	Plasma	SciLifeLab peptide array	SRP68_HPRR2500805	GEENKENERPSAGSKANKEFGDSLSLEILQIIKESQQQHGLRHGDFQRYRGYCSRRQRRLRKTLNFKMGNRHKFTGKKVTEELLTDNRYLLLVLMDAERAWSYAMQLKQEANTEPRKRFHLLSRLRKAVKHAEELERLCE	SRP68	Q9UHB9	MAD	0	0	FALSE
HTP0092B	Plasma	SciLifeLab peptide array	SRP68_HPRR2500807	DAKTKLEAQAYTAYLSGMLRFEHQEWKAAIEAFNKCKTIYEKLASAFTEEQAVLYNQRVEEISPNIRYCAYNIGDQSAINELMQMRLRSGGTEGLLAEKLEALITQTRAKQAATMSEVEWRGRTVPVKIDKVRIFLLGLADNEAAIV	SRP68	Q9UHB9	MAD	1	1.1	FALSE
HTP0092B	Plasma	SciLifeLab peptide array	SRP72_HPRR2870116	QHTKAIELLQEFSDQHPENAAEIKLTMAQLKISQGNISKACLILRSIEELKHKPGMVSALVTMYSHEEDIDSAIEVFTQAIQWYQNHQPKSPA	SRP72	O76094	MAD	-2	0	FALSE
HTP0092B	Plasma	SciLifeLab peptide array	SRP72_HPRR2870118	ENALKTIESANQQTDKLKELYGQVLYRLERYDECLAVYRDLVRNSQDDYDEERKTNLSAVVAAQSNWEKVVPENLGLQEGTHELCYNTACA	SRP72	O76094	MAD	-1	2.1	FALSE
HTP0092B	Plasma	SciLifeLab peptide array	SRP72_HPRR2870119	ANFKLKYGRKKEAISDLQQLWKQNPKDIHTLAQLISAYSLVDPEKAKALSKHLPSSDSMSLKVDVEALENSAGATYIRKKGGKVTGDSQPKEQG	SRP72	O76094	MAD	-1	4	FALSE
HTP0092B	Plasma	SciLifeLab peptide array	SSB_HPRR2010045	AKICHQIEYYFGDFNLPRDKFLKEQIKLDEGWVPLEIMIKFNRLNRLTTDFNVIVEALSKSKAELMEISEDKTKIRRSPSKPLPEVTDEYKNDVKNRSVYIKGFPTDATLDD	SSB	P05455	MAD	2	19.5	FALSE
HTP0092B	Plasma	SciLifeLab peptide array	SSB_HPRR2010046	VVFDSIESAKKFVETPGQKYKETDLLILFKDDYFAKKNEERKQNKVEAKLRAKQEQEAKQKL	SSB	P05455	MAD	1	4.1	FALSE
HTP0092B	Plasma	SciLifeLab peptide array	SSSCA1_HPRR3050793	NGAEVDDFSWEPPTEAETKVLQARRERQDRISRLMGDYLLRGYRMLGETCADCGTILLQDKQRKIYCVACQELDSDVDKDNPALNAQAALSQAR	SSSCA1	O60232	MAD	-2	0	FALSE
HTP0092B	Plasma	SciLifeLab peptide array	SUMO1_HPRR2920297	QDSSEIHFKVKMTTHLKKLKESYCQRQGVPMNSLRFLFEGQRIADNHTPKELGMEEEDVIEVYQEQT	SUMO1	P63165	MAD	0	1	FALSE
HTP0092B	Plasma	SciLifeLab peptide array	SUMO1_HPRR3890167	SDQEAKPSTEDLGDKKEGEYIKLKV	SUMO1	P63165	MAD	0	3	FALSE
HTP0092B	Plasma	SciLifeLab peptide array	SUMO4*_HPRR3230036	TDKPAQLEMEDEDTIDVFQQPTGGV	SUMO4*	Q6EEV6;P55854;P61956	MAD	-1	2.1	FALSE
HTP0092B	Plasma	SciLifeLab peptide array	SUMO4*_HPRR3230037	HINLKVAGQDGSVVQFKIKRHTPLSKLMKAYC	SUMO4*	Q6EEV6;P55854;P61956	MAD	-1	0	FALSE
HTP0092B	Plasma	SciLifeLab peptide array	TALDO1_HPRR3050870	FVGRILDWHVANTDKKSYEPLEDPGVKSVTKIYNYYKKFSYKTIVMGASFRNTGEIKALAGCDFLTISPKLLGEL	TALDO1	P37837	MAD	1	1	FALSE
HTP0092B	Plasma	SciLifeLab peptide array	TALDO1_HPRR3050873	MSSSPVKRQRMESALDQLKQFTTVVADTGDFHAIDEYKPQDATTNPSLILAAAQMPAYQELVEEAIAYGRKLGGS	TALDO1	P37837	MAD	0	8.2	FALSE
HTP0092B	Plasma	SciLifeLab peptide array	TARS_HPRR3010092	MFEEKASSPSGKMGGEEKPIGAGEEKQKEGGKKKNKEGSGDGGRAELNPWPEYIYTRLEMYNIL	TARS	P26639	MAD	0	0	FALSE
HTP0092B	Plasma	SciLifeLab peptide array	TARS_HPRR3890005	RDNKVHGERTISETIERLQQLKEFRSKQAEEEF	TARS	P26639	MAD	1	3.2	FALSE
HTP0092B	Plasma	SciLifeLab peptide array	TDRD6_HPRR2630195	VLHVDYGRKELVSCSSLRYLLPEYFRMPVVTYPCALYGLWDGGRGWSRSQVGDLKALILGKAVNAKIEFYCSFEHVYYVSLYGEDGINLNRVFGVQSC	TDRD6	O60522	MAD	1	2	FALSE
HTP0092B	Plasma	SciLifeLab peptide array	TDRD6_HPRR4290688	INSSYKELKLLQSLTKTNLVTQYQDSVGNKNSQVFPLTTEKKEEISAETPLKTARVEATLSERKIGDSCDKDLPLKFCEFPQKTI	TDRD6	O60522	MAD	1	25.1	FALSE
HTP0092B	Plasma	SciLifeLab peptide array	TG_HPRR350042	KMCSADYADLLQTFQVFILDELTARGFCQIQVKTFGTLVSIPVCNNSSVQVGCLTRERLGVNVTWKSRLEDIPVASLPDLHDIERALVGKDLLGRFTDLIQSGSFQLHLDSKTFPAETIRFLQGDHFGTSPRTWFGCSEGFYQVLTSEASQDGLGCVKCPEGS	TG	P01266	MAD	-2	-1	FALSE
HTP0092B	Plasma	SciLifeLab peptide array	TGM2_HPRR2430028	MAEELVLERCDLELETNGRDHHTADLCREKLVVRRGQPFWLTLHFEGRNYEASVDSLTFSVVTGPAPSQEAGTK	TGM2	P21980	MAD	2	2	FALSE
HTP0092B	Plasma	SciLifeLab peptide array	TGM2_HPRR2430030	VEPVINSYLLAERDLYLENPEIKIRILGEPKQKRKLVAEVSLQNPLPVALEGCTFTVEGAGLTEEQKTVEIPDPVEAGEEVKVRMDLLP	TGM2	P21980	MAD	-1	0	FALSE
HTP0092B	Plasma	SciLifeLab peptide array	TH_HPRR2010098	EFGLCKQNGEVKAYGAGLLSSYGELLHCLSEEPEIRAFDPEAAAVQPYQDQTYQSVYFVSESFSDAKDKLRSYASRIQRPFSVKFDPYTLAIDVLDSPQAVRRSLEGVQDEL	TH	P07101	MAD	-1	0	FALSE
HTP0092B	Plasma	SciLifeLab peptide array	TH_HPRR3790012	SESFSDAKDKLRSYASRIQRPFSVKFDPYTLAIDVLDSPQAVRRSLEGVQDELDTLAHALSAIG	TH	P07101	MAD	-1	2	FALSE
HTP0092B	Plasma	SciLifeLab peptide array	TKT_HPRR2460038	HYYEGGIGEAVSSAVVGEPGITVTHLAVNRVPRSGKPAELLKMFGIDRDAIAQAVRGLITKA	TKT	P29401	MAD	0	2.1	FALSE
HTP0092B	Plasma	SciLifeLab peptide array	TKT_HPRR2460039	IAKTFKGRGITGVEDKESWHGKPLPKNMAEQIIQEIYSQIQSKKKILATPPQEDAPSVDIANIRMPSLPSYKVGDKIATRKAYGQ	TKT	P29401	MAD	-2	2	FALSE
HTP0092B	Plasma	SciLifeLab peptide array	TMEM59_HPRR1950574	HLLFPLTLVRSFWSDMMDSAQSFITSSWTFYLQADDGKIVIFQSKPEIQYAPHLEQEPTNLRESSLSKMSSDLQMRNSQAHRNFLEDGESDGFLRCLSLNSGW	TMEM59	Q9BXS4	MAD	1	1	FALSE
HTP0092B	Plasma	SciLifeLab peptide array	TNFRSF13C_HPRR221279	SWRRRQRRLRGASSAEAPDGDKDAPEPLDKVIILSPGISDATAPAWPPPGEDPGTTPPGHSVPVPATELGSTELVTTKTAGPEQQ	TNFRSF13C	Q96RJ3	MAD	-1	2	FALSE
HTP0092B	Plasma	SciLifeLab peptide array	TNNC1_HPRR3460135	NADGYIDLDELKIMLQATGETITEDDIEELM	TNNC1	P63316	MAD	-1	1	FALSE
HTP0092B	Plasma	SciLifeLab peptide array	TNNC1_HPRR3460136	MDDIYKAAVEQLTEEQKNEFKAAFDIFVLGAEDGCISTKELGKVM	TNNC1	P63316	MAD	0	2.1	FALSE
HTP0092B	Plasma	SciLifeLab peptide array	TNNC2_HPRR3300245	NADGYIDPEELAEIFRASGEHVTDEEIESLM	TNNC2	P02585	MAD	-1	51.1	FALSE
HTP0092B	Plasma	SciLifeLab peptide array	TNNC2_HPRR3870324	ARSYLSEEMIAEFKAAFDMFDADGGGDISVKE	TNNC2	P02585	MAD	-1	2	FALSE
HTP0092B	Plasma	SciLifeLab peptide array	TNNI2_HPRR3960019	ELEKEESRREAEKQNYLAEHCPPLHIPGSMSEVQELCKQLHAKIDAAEEEKYDMEVRVQKTSK	TNNI2	P48788	MAD	-1	6.6	FALSE
HTP0092B	Plasma	SciLifeLab peptide array	TNNI3_HPRR3140624	PIRRRSSNYRAYATEPHAKKKSKISASRKLQLKTLLLQIAKQELEREAEERRGEKGRALSTRCQPLELAGLGFAELQ	TNNI3	P19429	MAD	-1	0	FALSE
HTP0092B	Plasma	SciLifeLab peptide array	TNNT1_HPRR3920058	EEEEAPEEPEPVAEPEEERPKPSRPVVPPLIPPKIPEGE	TNNT1	P13805	MAD	0	25.7	FALSE
HTP0092B	Plasma	SciLifeLab peptide array	TNNT2_HPRR2190018	IEEVVEEYEEEEQEEAAVEEEDWREDEDEQEEAAEEDAEAEAETEETRAEEDEEEEEAKEAEDGPMEESKPKPRSFMPNLV	TNNT2	P45379	MAD	21	98.7	FALSE
HTP0092B	Plasma	SciLifeLab peptide array	TNNT2_HPRR2190019	EEEENRRKAEDEARKKKALSNMMHFGGYIQKQAQTERKSGKRQTEREKKKKILAERRKVLAIDHLNEDQLREKAKELWQSIYNLEAEKFDLQEKFKQQKYEINVLRNRINDNQKVSK	TNNT2	P45379	MAD	-1	2.1	FALSE
HTP0092B	Plasma	SciLifeLab peptide array	TNNT3_HPRR3050240	RKPLNIDHLGEDKLRDKAKELWETLHQLEIDKFEFGEKLKRQKYDITTLRSRIDQAQKHSKKAGTPAKGKVG	TNNT3	P45378	MAD	-1	0.2	FALSE
HTP0092B	Plasma	SciLifeLab peptide array	TNNT3_HPRR3890527	EEEAQEEAAEVHEEVHEPEEVQEDTAEEDAEEEKPRPKLTAPK	TNNT3	P45378	MAD	0	5	FALSE
HTP0092B	Plasma	SciLifeLab peptide array	TOP1_HPRR2420091	GDHLHNDSQIEADFRLNDSHKHKDKHKDREHRHKEHKKEKDREKSKHSNSEHKDSEKKHKEKEKTKHKDGSSEKH	TOP1	P11387	MAD	-1	0	FALSE
HTP0092B	Plasma	SciLifeLab peptide array	TOP1_HPRR2420092	KVRASGDAKIKKEKENGFSSPPQIKDEPEDDGYFVPPKEDIKPLKRPRDEDDADYKPKK	TOP1	P11387	MAD	8	23.1	FALSE
HTP0092B	Plasma	SciLifeLab peptide array	TOP1_HPRR2420093	KKEKKRKLEEEEDGKLKKPKNKDKDKKVPEPDNKKKKPKKEEEQKWKWWEEERYPEGIKWKFLEHKGPVFAPPYEPLPENVKFYYD	TOP1	P11387	MAD	-1	2	FALSE
HTP0092B	Plasma	SciLifeLab peptide array	TOP2A_HPRR1370117	RGQRVIPRITIEMKAEAEKKNKKKIKNENTEGSPQEDGVELEGLKQRLEKKQKREPGTKTKKQTTLAFKPIKKGKKRNPWSDSESDRSSDESNFDVP	TOP2A	P11388	MAD	0	3.1	FALSE
HTP0092B	Plasma	SciLifeLab peptide array	TOP2A_HPRR1370118	DASPPKTKTSPKLSNKELKPQKSVVSDLEADDVKGSVPLSSSPPATHFPDETEITNPVPKKNVTVKKTAAKSQSSTSTTGAKKRAAPKGTKRDPALNSGVSQKPDPAKTKNRRKRKPSTSDDSDSNFEKIVSKAVTSKKSKG	TOP2A	P11388	MAD	4	22.2	FALSE
HTP0092B	Plasma	SciLifeLab peptide array	TPH1_HPRR1220002	ISELKHALSGHAKVKPFDPKITCKQECLITTFQDVYFVSESFEDAKEKMREFTKTIKRPFGVKYNPYTRSIQILKDTKSITSAMNELQHDLDVVSDALAKVSRKPSI	TPH1	P17752	MAD	0	1	FALSE
HTP0092B	Plasma	SciLifeLab peptide array	TPM4*_HPRR3340170	EMQLKEAKHIAEEADRKYEEVARKLVILE	TPM4*	P67936;P07951;P09493;P06753	MAD	4	16	FALSE
HTP0092B	Plasma	SciLifeLab peptide array	TPM4*_HPRR3340171	KAADESERGMKVIENRAMKDEEKMEIQE	TPM4*	P67936;P07951;P09493;P06753	MAD	0	0	FALSE
HTP0092B	Plasma	SciLifeLab peptide array	TPM4*_HPRR3340172	LNRRIQLVEEELDRAQERLATALQKLEE	TPM4*	P67936;P07951;P09493;P06753	MAD	1	11.1	FALSE
HTP0092B	Plasma	SciLifeLab peptide array	TPO_HPRR1950563	RELEKHSLSRVICDNTGLTRVPMDAFQVGKFPEDFESCDSITGMNLEAWRETFPQDDKCGFPESVENGDFVHCEESGRRVLVYSCRHGYELQGREQLTCTQEGWDFQPPLCKDVNECADGA	TPO	P07202	MAD	122	22.9	TRUE
HTP0092B	Plasma	SciLifeLab peptide array	TPO_HPRR4180385	STVICRWTRTGTKSTLPISETGGGTPELRCGKHQAVGTSPQRAAAQDSEQESAGMEGRDTHRLPRA	TPO	P07202	MAD	7	59.6	FALSE
HTP0092B	Plasma	SciLifeLab peptide array	TRIM21_HPRR1060031	LEKDEREQLRILGEKEAKLAQQSQALQELISELDRRCHSS	TRIM21	P19474	MAD	0	15.4	FALSE
HTP0092B	Plasma	SciLifeLab peptide array	TRIM24_HPRR3500066	NCAEFNEPDSEVANAGIKLENYFEELLKNLYPEKRFPKPEFRNESEDNKFSDDSDDDFVQPRKKRLKSIEERQLLK	TRIM24	O15164	MAD	0	21.2	FALSE
HTP0092B	Plasma	SciLifeLab peptide array	TRIM24_HPRR3500067	SSPVGGSYNLPSLPDIDCSSTIMLDNIVRKDTNIDHGQPRPPSNRTVQSPNSSVPSPGLAGPVTMTSVHPPIRSPSA	TRIM24	O15164	MAD	-1	0	FALSE
HTP0092B	Plasma	SciLifeLab peptide array	TRIM28_HPRR4180661	TDSTFSLDQPGGTLDLTLIRARLQEKLSPPYSSPQEFAQDVGRMFKQFNKLTEDKADVQSIIGLQRFFETRMNEAFGDTKFSAVLV	TRIM28	Q13263	MAD	-1	1	FALSE
HTP0092B	Plasma	SciLifeLab peptide array	TRIM33_HPRR640002	MQPHLQRQHSNPGHAGPFPVVSVHNTTINPTSPTTATMANANRGPTSPSVTAIELIPSVTNPENLPSLPDIPPIQLEDAGSSSLDNLLSRYISGSHLPPQPTSTMNPSPGPSALSPGSSGLSNSHTPVRPPSTSSTGSR	TRIM33	Q9UPN9	MAD	0	7	FALSE
HTP0092B	Plasma	SciLifeLab peptide array	TROVE2_HPRR400060	ESVNQMQPLNEKQIANSQDGYVWQVTDMNRLHRFLCFGSEGGTYYIKEQKLGLENAEALIRLIEDGRGCEVIQEIKSFSQEGRTTKQEPMLFALAICSQCSDISTKQAAFKAVSEVCRIPTHLFTFIQFKKDLKESMKCGMWG	TROVE2	P10155	MAD	9	4	TRUE
HTP0092B	Plasma	SciLifeLab peptide array	TROVE2_HPRR400061	FLLAVDVSASMNQRVLGSILNASTVAAAMCMVVTRTEKDSYVVAFSDEMVPCPVTTDMTLQQVLMAMSQIPAGGTDCSLPMIWAQKTNTPADVFIVFTDNETFAGGVHPAIALREYRKKMDIPAKLIVCGMTSNGF	TROVE2	P10155	MAD	-2	-2	FALSE
HTP0092B	Plasma	SciLifeLab peptide array	TRPC3_HPRR2870071	NFPKCRRRRLQKDIEMGMGNSKSRLNLFTQSNSRVFESHSFNSILNQPTRYQQI	TRPC3	Q13507	MAD	-1	2.1	FALSE
HTP0092B	Plasma	SciLifeLab peptide array	TSGA10_HPRR2920463	IASLGESLAMKEKTISGMKNIIAEMEQASRQCTEALIVCEQDVSRMRRQLDETNDELAQIARERDILAHDNDNLQEQFAKAKQENQ	TSGA10	Q9BZW7	MAD	2	19.9	FALSE
HTP0092B	Plasma	SciLifeLab peptide array	TSGA10_HPRR2920464	RREMMKSCKSPKSTTAHAILRRVETERDVAFTDLRRMTTERDSLRERLKIAQETAFNEKAHLEQRIEELECTVHNLDDERMEQMSNM	TSGA10	Q9BZW7	MAD	1	19.3	FALSE
HTP0092B	Plasma	SciLifeLab peptide array	TSHR_HPRR141622	RADLSYPSHCCAFKNQKKIRGILESLMCNESSMQSLRQRKSVNALNSPLHQEYEENLGDSIVGYKEKSKFQDTHNNAHYYVFFEEQEDEIIGFGQELKNPQEETLQAFDSHYDYTICGDSEDMVCTPKSDEFNPC	TSHR	P16473	MAD	-1	-1	FALSE
HTP0092B	Plasma	SciLifeLab peptide array	TSHR_HPRR4220232	MGCSSPPCECHQEEDFRVTCKDIQRIPSLPPSTQTLKLIETHLRTIPSHAFSNLPNISRIYVSIDVTLQQLESHSF	TSHR	P16473	MAD	-1	-1	FALSE
HTP0092B	Plasma	SciLifeLab peptide array	TTN_HPRR1830052	GTVSTSCYLAVQVSEEFEKETTAVTEKFTTEEKRFVESRDVVMTDTSLTEEQAGPGEPAAPYFITKPVVQKLVEGGSVVFGCQVGGNPKPHVYWKKSGVPLTTGYRYKVSYNKQTGECKLVISMTFADDAGEYT	TTN	Q8WZ42	MAD	0	7	FALSE
HTP0092B	Plasma	SciLifeLab peptide array	TTN_HPRR1830053	HFLSILTIDTSDAEDYSCVLVEDENVKTTAKLIVEGAVVEFVKELQDIEVPESYSGELECIVSPENIEGKWYHNDVELKSNGKYTITSRRGRQNLTVKDVTKEDQGEYSFVIDGKKTTCKLKMK	TTN	Q8WZ42	MAD	0	4.1	FALSE
HTP0092B	Plasma	SciLifeLab peptide array	UBA1_HPRR232462	KISFKSLVASLAEPDFVVTDFAKFSRPAQLHIGFQALHQFCAQHGRPPRPRNEEDAAELVALAQAVNARALPAVQQNNLDEDLIRKLAYVAAGDLAPINAFIGGLAAQEVMKACSGKFMPIMQWLYFDALECLPEDKEVLTEDKCLQR	UBA1	P22314	MAD	1	3	FALSE
HTP0092B	Plasma	SciLifeLab peptide array	UBA1_HPRR232463	LYKVVQGHRQLDSYKNGFLNLALPFFGFSEPLAAPRHQYYNQEWTLWDRFEVQGLQPNGEEMTLKQFLDYFKTEHKLEITMLSQGVSMLYSFFMPAAKLKERLDQPMTEIVSRVSKRKLGRHVRALVLELCCNDESGEDVEVPYVRYTIR	UBA1	P22314	MAD	5	5	FALSE
HTP0092B	Plasma	SciLifeLab peptide array	UGT1A1_HPRR3790923	SHWLSMLGAIQQLQQRGHEIVVLAPDASLYIRDGAFYTLKTYPVPFQREDVKES	UGT1A1	P22309	MAD	-1	0	FALSE
HTP0092B	Plasma	SciLifeLab peptide array	UGT1A5*_HPRR4420458	HRSCVELLHNEALIRHLHATSFDVVLTDP	UGT1A5*	P35504;P22310;P35503	MAD	-1	7.1	FALSE
HTP0092B	Plasma	SciLifeLab peptide array	UGT1A6_HPRR3761044	WLSMKDIVEVLSDRGHEIVVVVPEVNLLLKESKYYTRKIYPVPYDQEELKNRYQSFGNNHFAERSFLTAPQTEYRNNMIVIGLY	UGT1A6	P19224	MAD	0	0	FALSE
HTP0092B	Plasma	SciLifeLab peptide array	UGT1A8*_HPRR3340348	QPVKPLDRAVFWIEFVMRHKGAKHLRVAAHDLTWFQYHSL	UGT1A8*	Q9HAW9;Q9HAW8;O60656;Q9HAW7;P19224;P35504;P22310;P35503;P22309;O75795;P54855;P36537;Q6UWM9;P16662;O75310;Q9BY64;P06133;Q9Y4X1	MAD	0	1	FALSE
HTP0092B	Plasma	SciLifeLab peptide array	UGT2A1_HPRR1951665	KEHNVTVLVASGALFITPTSNPSLTFEIYKVPFGKERIEGVIKDFVLTWLENRPSPSTIWRFYQEMAKVIKDFHMVSQEICDGVLKNQQLMAKLKKSKFEVLVSDPVFPCGDIVALKLGIPFMYS	UGT2A1	Q9Y4X1	MAD	3	6	FALSE
HTP0092B	Plasma	SciLifeLab peptide array	VCL_HPRR350132	KMIDERQQELTHQEHRVMLVNSMNTVKELLPVLISAMKIFVTTKNSKNQGIEEALKNRNFTVEKMSAEINEIIRVLQLTSWDEDAWASKDTEAMKRALASIDSKLNQAKGWLRDPSASPGDAGEQAIRQILDEAGKVGELCAGKERREI	VCL	P18206	MAD	13	6.1	TRUE
HTP0092B	Plasma	SciLifeLab peptide array	VCL_HPRR4160211	SALTSKLADLRRQGKGDSPEARALAKQVATALQNLQTKTNRAVANSRPAKAAVHLEGKIEQAQRWIDNPTVDDRGVGQAAIRGLVAEGHRLANVMMGP	VCL	P18206	MAD	0	4	FALSE
HTP0092B	Plasma	SciLifeLab peptide array	VIM_HPRR370004	FANYIDKVRFLEQQNKILLAELEQLKGQGKSRLGDLYEEEMRELRRQVDQLTNDKARVEVERDNLAEDIMRLREKLQEEMLQREEAENTLQSFRQDVDNASLARLDLERKVES	VIM	P08670	MAD	-1	2	FALSE
HTP0092B	Plasma	SciLifeLab peptide array	WARS_HPRR141609	TDSDCIGKISFPAIQAAPSFSNSFPQIFRDRTDIQCLIPCAIDQDPYFRMTRDVAPRIGYPKPALLHSTFFPALQGAQTKMSASDPNSSIFLTDTAKQIKTKVNKHAFSGGRDTIEEHRQFGGNCDVDVSFMYLTF	WARS	P23381	MAD	0	0	FALSE
HTP0092B	Plasma	SciLifeLab peptide array	WARS_HPRR141610	DATEAEEDFVDPWTVQTSSAKGIDYDKLIVRFGSSKIDKELINRIERATGQRPHHFLRRGIFFSHRDMNQVLDAYENKKPFYLYTGRGPSSEAMHVGHLIPFIFTKWLQDVFNVPLVIQMTDDEKYLWKDLTLDQAYSYAVENA	WARS	P23381	MAD	6	6	FALSE
HTP0092B	Plasma	SciLifeLab peptide array	XKR6_HPRR2540593	YGVLHPTGPRAKILASSCCAELLWGIPLPPDVEPMAPEIPGYRGTQVTPTRAVTEQQEDLTADTCLPVFQVRPMGPPTPLGRPYLPEGPLIKIDMPR	XKR6	Q5GH73	MAD	-1	0.1	FALSE
HTP0092B	Plasma	SciLifeLab peptide array	XKR6_HPRR4040109	FVDRRLRRTINILQYVTPTAVGIRYRDGPLLYELLQYESSL	XKR6	Q5GH73	MAD	1	1	FALSE
HTP0092B	Plasma	SciLifeLab peptide array	XKR8_HPRR3410225	GLLVWQQEEPSEFDLAYADFLALDISM	XKR8	Q9H6D3	MAD	-1	2.1	FALSE
HTP0092B	Plasma	SciLifeLab peptide array	XKR8_HPRR3410226	HPSCCWKPDPDQVDGARSLLSPEGYQLPQNRRMTHLAQKFFPKAKDEAASPVKG	XKR8	Q9H6D3	MAD	0	2	FALSE
HTP0092B	Plasma	SciLifeLab peptide array	XKR9_HPRR2180234	FHPNRSAETKCDEIDGKPVLRECRMRYFLME	XKR9	Q5GH70	MAD	0	5.1	FALSE
HTP0092B	Plasma	SciLifeLab peptide array	YARS_HPRR2320095	GNVENNGVLSFIKHVLFPLKSEFVILRDEKWGGNKTYTAYVDLEKDFAAEVVHPGDLKNSVEVALNKLLDPIREKFNTPALKKLASAAYPDPSKQKPMAKGPAKNSEPEEVIPSRLDIRVGKIITVEKHPDAD	YARS	P54577	MAD	1	15.7	FALSE
HTP0092B	Plasma	SciLifeLab peptide array	YARS_HPRR2320096	VLCNLKPQKMRGVESQGMLLCASIEGINRQVEPLDPPAGSAPGEHVFVKGYEKGQPDEELKPKKKVFEKLQADFKISEECIAQWKQTNFMTKLGSIS	YARS	P54577	MAD	0	1	FALSE
HTP0092B	Plasma	SciLifeLab peptide array	ZNF688_HPRR3610291	QWIHRSCSGGRRGRRPGIRAVPRAPVRGDRDPPVLFRHYPDIFEECG	ZNF688	P0C7X2	MAD	-1	1	FALSE
HTP0092B	Plasma	SciLifeLab peptide array	ZNF688_HPRR3610292	GERLGGARRGDVPNRKEEEPEEVPRAKGPRKAPVKESPEVLVERNPDPAISVAPARAQPPKNAAWDPTTGAQ	ZNF688	P0C7X2	MAD	49	316.9	FALSE
HTP0393A	Plasma	SciLifeLab peptide array	A2M_HPRR350039	SVLLMKPDAELSASSVYNLLPEKDLTGFPGPLNDQDDEDCINRHNVYINGITYTPVSSTNEKDMYSFLEDMGLKAFTNSKIRKPKMCPQLQQYEMHGPEGLRVGFYESDVMGRGHARLVHVEEPHTETVRKYFPETWIWDLVVVNS	A2M	P01023	MAD	0	3	FALSE
HTP0393A	Plasma	SciLifeLab peptide array	AARS_HPRR3160056	DRASKADVQKRVLEKTKQFIDSNPNQPLVILEMESGASAKALNEALKLFKMHSPQTSAMLFTVDNEAGKITCLCQVPQNAANRGLKASEWVQQVSGLMDGKGGGKD	AARS	P49588	MAD	0	7.1	FALSE
HTP0393A	Plasma	SciLifeLab peptide array	AARS_HPRR3160058	EFTVKNAQVRGGYVLHIGTIYGDLKVGDQVWLFIDEPRRRPIMSNHTATHILNFALRSVLGEADQKGSLVAPDRLRFDFTAKGAMSTQQIKKAEEIANEMIEAAKAVYTQDCP	AARS	P49588	MAD	0	1	FALSE
HTP0393A	Plasma	SciLifeLab peptide array	ABCC8_HPRR2060003	DHLGKENDVFQPKTQFLGVYFVSSQ	ABCC8	Q09428	MAD	0	2	FALSE
HTP0393A	Plasma	SciLifeLab peptide array	ABCC8_HPRR4160072	VSVQKLSEFLSSAEIREEQCAPHEPTPQGPASKYQAVPLRVVNRKRPAREDCRGLTGPLQSLVPSADGDADNCCVQIMGGYFTWTPD	ABCC8	Q09428	MAD	-1	1.1	FALSE
HTP0393A	Plasma	SciLifeLab peptide array	ACHE_HPRR2440120	RGIRLKTPGGPVSAFLGIPFAEPPMGPRRFLPPEPKQPWSGVVDATTFQSVCYQYVDTLYPGFEGTEMWNPNRE	ACHE	P22303	MAD	1	1.1	FALSE
HTP0393A	Plasma	SciLifeLab peptide array	ACHE_HPRR3870163	TVGMGEARRRATQLAHLVGCPPGGTGGNDTELVACLRTRPAQVLVNHEWHVLPQESVFRFSFVPVVDGDFLSDTPEALINAGDFHG	ACHE	P22303	MAD	0	1	FALSE
HTP0393A	Plasma	SciLifeLab peptide array	ACTA2*_HPRR3230094	PKANREKMTQIMFETFNTPAMYVAIQ	ACTA2*	P62736;P63267;A5A3E0;P0CG38;P0CG39;Q6S8J3;P63261;P60709;P68032;P68133;Q562R1	MAD	0	8	FALSE
HTP0393A	Plasma	SciLifeLab peptide array	ACTA2*_HPRR3230096	MVGMGQKDSYVGDEAQSKRGILTLKYPIEHGIVTNWD	ACTA2*	P62736;P63267;A5A3E0;P0CG38;P0CG39;Q6S8J3;P63261;P60709;P68032;P68133;Q562R1	MAD	-1	0	FALSE
HTP0393A	Plasma	SciLifeLab peptide array	AIMP1_HPRR2310067	CNLKPAKMRGVLSQAMVMCASSPEKIEILAPPNGSVPGDRITFDAFPGEPDKELNPKKKIWEQIQPDLHTNDECVATYKGVPFEVKGKGVCRAQTMSNSGI	AIMP1	Q12904	MAD	2	1	TRUE
HTP0393A	Plasma	SciLifeLab peptide array	AIMP1_HPRR2310068	MANNDAVLKRLEQKGAEADQIIEYLKQQVSLLKEKAILQATLREEKKLRVENAKLKKEIEELKQELIQAEIQNGV	AIMP1	Q12904	MAD	20	67.3	FALSE
HTP0393A	Plasma	SciLifeLab peptide array	AIMP1_HPRR2310069	TPLHANSMVSENVIQSTAVTTVSSGTKEQIKGGTGDEKKAKEKIEKKGEKKEKKQQSIAGSADSKPIDVSRLDLRIGCIITARKHPDADSLY	AIMP1	Q12904	MAD	3	38	FALSE
HTP0393A	Plasma	SciLifeLab peptide array	AIMP2_HPRR2440262	APLRVELPTCMYRLPNVHGRSYGPAPGAGHVQEESNLSLQALESRQDDILKRLYELKAAVDGLSKMIQTPDADLDVTNIIQADEPTTLTTNAL	AIMP2	Q13155	MAD	10	2.2	TRUE
HTP0393A	Plasma	SciLifeLab peptide array	AIMP2_HPRR2440263	SVLGKDYGALKDIVINANPASPPLSLLVLHRLLCEHFRVLSTVHTHSSVKSVPENLLKCFGEQNKKQPRQDYQLGFTLIWKNVPKTQ	AIMP2	Q13155	MAD	-2	-0.9	FALSE
HTP0393A	Plasma	SciLifeLab peptide array	AIMP2_HPRR2440264	IARFLFSLFGQKHNAVNATLIDSWVDIAIFQLKEGSSKEKAAVFRSMNSALGKSPWLAGNELTVADVVLWSVLQQIGGCSVTVPANVQRWMRSCENLAPFNTALKLLK	AIMP2	Q13155	MAD	0	2	FALSE
HTP0393A	Plasma	SciLifeLab peptide array	ALOX12_HPRR1960006	YAWVPNAPCTMRMPPPTTKEDVTMATVMGSLPDVRQACLQMAISWHLSRRQPDMVPLGHHKEKYFSGPKPKAVLNQFRTDLEKLEKEITARNEQLDWPYEY	ALOX12	P18054	MAD	-1	1	FALSE
HTP0393A	Plasma	SciLifeLab peptide array	ALOX12_HPRR1960007	PGDNALDMFQKHREKELKDRQQIYCWATWKEGLPLTIAADRKDDLPPNMRFHEEKRLDFEWTLKAGALEMALKRVYTLLSSWNCLEDFDQIFWGQKSALAEKVRQCWQDDELFSYQFLNGANP	ALOX12	P18054	MAD	1	0	TRUE
HTP0393A	Plasma	SciLifeLab peptide array	ANO2_HPRR3070034	PTDISDQIKKEKSLLVDFFLKEEHEKLKLMDEPALRSPGGGDRSRSRAASSAPSGQSQLGSMMSSGSQHTNV	ANO2	Q9NQ90	MAD	0	8.2	FALSE
HTP0393A	Plasma	SciLifeLab peptide array	ANO2_HPRR3070036	EPVSLEARLSRMHFHDSQRKVDYVLAYHYRKRGVHLAQGFPGHSLAIVSNGETGKEPHAGGPGDIELGPLDALEEERKEQREEFEHNLM	ANO2	Q9NQ90	MAD	3	17.4	FALSE
HTP0393A	Plasma	SciLifeLab peptide array	ANO2_HPRR3070037	IPLLPGSPRRLSPQAGSRGGQGPKHGQQCLKMPGPRAPGLQGGSNRDPGQPCGGESTRSSSVINNYLDAN	ANO2	Q9NQ90	MAD	0	1	FALSE
HTP0393A	Plasma	SciLifeLab peptide array	ANXA2_HPRR3460748	YDAGVKRKGTDVPKWISIMTERSVPHLQKVFDRYKSYSPYDMLESIRKEVKGDLENAFLNLVQCIQNKPLYFADRLYDSMKGKG	ANXA2	P07355	MAD	1	0	TRUE
HTP0393A	Plasma	SciLifeLab peptide array	ANXA2_HPRR3460749	MGRQLAGCGDAGKKASFKMSTVHEILCKLSLEGDHSTPPSAYGSVKAYTNFDAERDALNIETAIKTKGVDEVTIVNI	ANXA2	P07355	MAD	1	48.1	FALSE
HTP0393A	Plasma	SciLifeLab peptide array	ANXA5_HPRR1350096	GTVTDFPGFDERADAETLRKAMKGLGTDEESILTLLTSRSNAQRQEISAAFKTLFGRDLLDDLKSELTGKFEKLIVALMKPSRLYDAYELKHALKGAGTNEKVLTEIIASRTPEELRAIKQVYEEEYGSSLEDDVVG	ANXA5	P08758	MAD	58	8.1	TRUE
HTP0393A	Plasma	SciLifeLab peptide array	ANXA5_HPRR1350097	LVVLLQANRDPDAGIDEAQVEQDAQALFQAGELKWGTDEEKFITIFGTRSVSHLRKVFDKYMTISGFQIEETIDRETSGNLEQLLLAVVKSIRSIPAYLAETLYYAMKGAG	ANXA5	P08758	MAD	-1	11	FALSE
HTP0393A	Plasma	SciLifeLab peptide array	APOH_HPRR350085	EPGEEITYSCKPGYVSRGGMRKFICPLTGLWPINTLKCTPRVCPFAGILENGAVRYTTFEYPNTISFSCNTGFYLNGADSAKCTEEGKWSPELPVCAPIICPPPSIPTFATLRVYKPSAGNNSLYRDTAVFECLPQHAMFGNDTITC	APOH	P02749	MAD	4	4	FALSE
HTP0393A	Plasma	SciLifeLab peptide array	AQP4_HPRR4040261	MSDRPTARRWGKCGPLCTRENIMVAFKGVWTQAFWKA	AQP4	P55087	MAD	0	1	FALSE
HTP0393A	Plasma	SciLifeLab peptide array	ARFGAP1_HPRR3300073	TLPSMVHRVSGQPQSVTASSDKAFEDWLNDDLGSYQGAQGNRYVGFGNTPPPQKKEDDFLNNAMSSLYSGWSSFTTGASRFASAAKEGATKFGSQASQKASEL	ARFGAP1	Q8N6T3	MAD	429	324.3	TRUE
HTP0393A	Plasma	SciLifeLab peptide array	ARFGAP1_HPRR3300076	DHFQNSNIDQSFWETFGSAEPTKTRKSPSSDSWTCADTSTERRSSDSWEVWGSASTNRNSNSDGGEGGEGTKKAVPPAVPTDDGWD	ARFGAP1	Q8N6T3	MAD	-1	9.1	FALSE
HTP0393A	Plasma	SciLifeLab peptide array	CACNA1S_HPRR3410011	EEEKSTMAKKLEQKPKGEGIPTTAKLKIDEFESNVNEVKDPYPSADFPGDDEEDEPEIPLSPRPRPLAEL	CACNA1S	Q13698	MAD	-1	16.6	FALSE
HTP0393A	Plasma	SciLifeLab peptide array	CACNA1S_HPRR3410014	ESPVFLEDFPQDPRTNPLARANTNNANANVAYGNSNHSNSHVFSSVHYEREFPEETETPATRGRALGQPCRVLGPHSKPCVE	CACNA1S	Q13698	MAD	27	16	TRUE
HTP0393A	Plasma	SciLifeLab peptide array	CARS_HPRR400045	SQCNLYMAARKAVRKRPNQALLENIALYLTHMLKIFGAVEEDSSLGFPVGGPGTSLSLEATVMPYLQVLSEFREGVRKIAREQKVPEILQLSDALRDNILPELGVRFEDHEGLPTVVKLVDRNTLLKEREEKRRVE	CARS	P49589	MAD	1	3	FALSE
HTP0393A	Plasma	SciLifeLab peptide array	CARS_HPRR400046	HLFEQYREKRPEAAQLLEDVQAALKPFSVKLNETTDPDKKQMLERIQHAVQLATEPLEKAVQSRLTGEEVNSCVEVLLEEAKDLLSDWLDSTLGCDVTDNSIFSKLPKFWEGDFHRDMEALNVLPPDVL	CARS	P49589	MAD	-1	4	FALSE
HTP0393A	Plasma	SciLifeLab peptide array	CASR_HPRR3140049	ADDDYGRPGIEKFREEAEERDICIDFSELISQYSDEEEIQHVVEVIQNSTAKVIVVFSSGPDLEPLIKEIVRRNITGKIWLASEAWASSSLI	CASR	P41180	MAD	-1	-1	FALSE
HTP0393A	Plasma	SciLifeLab peptide array	CASR_HPRR3140052	GTVTFSLSFDEPQKNAMAHRNSTHQNSLEAQKSSDTLTRHQPLLPLQCGETDLDLTVQETGLQGPVGGDQRPEVEDPEELSPALVVSSSQSFVISGG	CASR	P41180	MAD	0	5.2	FALSE
HTP0393A	Plasma	SciLifeLab peptide array	CAST_HPRR3010396	STYIEELGKREVTIPPKYRELLAKKEGITGPPADSSKPIGPDDAIDALSSDFTCGSPTAAGKKTEKEESTEVLKAQSAGTVRSAAP	CAST	P20810	MAD	-1	6.5	FALSE
HTP0393A	Plasma	SciLifeLab peptide array	CAST_HPRR3010397	GPQNASSLKFEDAKLAAAISEVVSQTPASTTQAGAPPRDTSQSDKDLDDALDKLSDSLGQRQPDPDENKPMEDKVKE	CAST	P20810	MAD	22	42.2	FALSE
HTP0393A	Plasma	SciLifeLab peptide array	CENPA_HPRR3730167	PSLGASSHQHSRRRQGWLKEIRKLQKSTHLL	CENPA	P49450	MAD	-1	0	FALSE
HTP0393A	Plasma	SciLifeLab peptide array	CENPA_HPRR3890121	RKLPFSRLAREICVKFTRGVDFNWQAQALLAL	CENPA	P49450	MAD	0	2.1	FALSE
HTP0393A	Plasma	SciLifeLab peptide array	CENPB_HPRR3310037	ERGVVQQVKGHYRQAMLLKAMAALEGQDPSGLQLGLTEALHFVAAAWQAVEPSDIAACFREAGFGGGPNATITTSL	CENPB	P07199	MAD	0	1.1	FALSE
HTP0393A	Plasma	SciLifeLab peptide array	CENPB_HPRR3310039	TFREKSRIIQEVEENPDLRKGEIARRFNIPPSTLSTILKNKRAILASERKYGVASTCRKTNKLSPYDKLEGLLIAWFQQIRAAGLPVKGIIL	CENPB	P07199	MAD	-1	0	FALSE
HTP0393A	Plasma	SciLifeLab peptide array	CENPE_HPRR1470072	EKIENLTRMLVTSSSLTLQQELKAKRKRRVTWCLGKINKMKNSNYADQFNIPTNITTKTHKLSINLLREIDESVCSESDVFSNTLDTLSEIEWNPATKLLNQENIESELNSLRADYDN	CENPE	Q02224	MAD	1	3.1	FALSE
HTP0393A	Plasma	SciLifeLab peptide array	CENPE_HPRR4340147	MRVKANLSLPYLQTKHIEKLFTANQRCSMEFHRIMKKLKYVLSYVTKIKEEQHESINKFEMDFIDEVEKQKELLIKIQHLQQDCDVPSRELRDLKLNQNMD	CENPE	Q02224	MAD	0	0.1	FALSE
HTP0393A	Plasma	SciLifeLab peptide array	CENPF_HPRR1390029	SCWKSENEKLLTQMESEKENLQSKINHLETCLKTQQIKSHEYNERVRTLEMDRENLSVEIRNLHNVLDSKSVEVETQKLAYMELQQKAEFSDQKHQKEIENMCLKTSQLTGQVEDLEHKLQLLSNEIMDKDRCYQDLHAEYE	CENPF	P49454	MAD	1	96.8	FALSE
HTP0393A	Plasma	SciLifeLab peptide array	CENPF_HPRR1390030	CISELSFSGPNALVPMDFLGNQEDIHNLQLRVKETSNENLRLLHVIEDRDRKVESLLNEMKELDSKLHLQEVQLMTKIEACIELEKIVGELKKENSDLSEKLEYFSCDHQEL	CENPF	P49454	MAD	0	2	FALSE
HTP0393A	Plasma	SciLifeLab peptide array	CHD3_HPRR3420199	LKIKLGLLGGKREKGGSYVFQSDEGPEPEAEESDLDSGSVHSASGRPDGPVRTKKLKRGRPGRKKKKLLGCPA	CHD3	Q12873	MAD	1	1	FALSE
HTP0393A	Plasma	SciLifeLab peptide array	CHGA_HPRR300004	NSPMNKGDTEVMKCIVEVISDTLSKPSPMPVSQECFETLRGDERILSILRHQNLLKELQDLALQGAKERAHQQKKHSGFEDELSEVLENQSSQAELKEAVEEPSSKDVMEKREDSKEAEKSGEATDGARPQALPEPMQESK	CHGA	P10645	MAD	24	17.4	TRUE
HTP0393A	Plasma	SciLifeLab peptide array	CHRNA1_HPRR4110442	MKLGTWTYDGSVVAINPESDQPDLSNFMESGEWVIKESRGWKHSVTYSCCPDTPYLDITYHF	CHRNA1	P02708	MAD	-1	3	FALSE
HTP0393A	Plasma	SciLifeLab peptide array	CLDN11*_HPRR2010004	NDWVVTCGYTIPTCRKLDELGSKGLWADCVMATGLYHCKPLVDILILPGY	CLDN11*	O75508	MAD	0	1	FALSE
HTP0393A	Plasma	SciLifeLab peptide array	CLDN11_HPRR2010005	DAQAFGENRFYYTAGSSSPTHAKSAHV	CLDN11	O75508	MAD	-1	3.3	FALSE
HTP0393A	Plasma	SciLifeLab peptide array	CNP_HPRR2500894	TLARVIVDKYRDGTKMVSADAYKITPGARGAFSEEYKRLDEDLAAYCRRRDIRILVLDDTNHERERLEQLFEMADQYQYQVVLVEPKTAWRLDCAQLKEKNQW	CNP	P09543	MAD	11	21.4	FALSE
HTP0393A	Plasma	SciLifeLab peptide array	CNP_HPRR2500896	PGVLHCTTKFCDYGKAPGAEEYAQQDVLKKSYSKAFTLTISALFVTPKTTGARVELSEQQLQLWPSDVDKLSPTDNLPRGSRAHITL	CNP	P09543	MAD	3	38.5	FALSE
HTP0393A	Plasma	SciLifeLab peptide array	COL17A1_HPRR3500044	NLPSHVWSSTLPAGSSMGTYHNNMTTQSSSLLNTNAYSAGSVFGVPNNMASCSPTLHPGLSTSSSVFGMQNNLAPSLTTLSHGTTTTSTA	COL17A1	Q9UMD9	MAD	-1	0	FALSE
HTP0393A	Plasma	SciLifeLab peptide array	COL17A1_HPRR3500046	DGTEVTERIVTETVTTRLTSLPPKGGTSNGYAKTASLGGGSRLEKQSLTHGSSGYINSTGSTRGHASTSSYRRAHSPASTLPNSPGSTFERKTHVTR	COL17A1	Q9UMD9	MAD	7	10	FALSE
HTP0393A	Plasma	SciLifeLab peptide array	CPE_HPRR270004	VLSANLHGGDLVANYPYDETRSGSAHEYSSSPDDAIFQSLARAYSSFNPAMSDPNRPPCRKNDDDSSFVDGTTNGGAWYSVPGGMQDFNYLSSNCFEITVELSCEKFPPEETLKTYWEDNKNSLISYLEQIHR	CPE	P16870	MAD	-2	5.1	FALSE
HTP0393A	Plasma	SciLifeLab peptide array	CPE_HPRR4180113	GNYKLTASAPGYLAITKKVAVPYSPAAGVDFELESFSERKEEEKEELMEWWKMMS	CPE	P16870	MAD	2	56.3	FALSE
HTP0393A	Plasma	SciLifeLab peptide array	CRYAB_HPRR2700063	RPFFPFHSPSRLFDQFFGEHLLESDLFPTSTSLSPFYLRPPSFLRAPSWFDTGLSEMRLEKDRFSVNLDVKHFSPEELKVKVLGDVIE	CRYAB	P02511	MAD	0	1	FALSE
HTP0393A	Plasma	SciLifeLab peptide array	CRYAB_HPRR3880249	KYRIPADVDPLTITSSLSSDGVLTVNGPRKQVSGPERTIPITREEKPAVTAA	CRYAB	P02511	MAD	21	7	TRUE
HTP0393A	Plasma	SciLifeLab peptide array	CYP11A1_HPRR2120012	RSVLVKGCQTFLSAPREGLGRLRVPTGEGAGISTRSPRPFNEIPSPGDNGWLNLYHFWRETGTHKVHLHHVQNFQKYGPIYREKLGNVESVYVIDPEDVALLFKSEGPNPERFLIPPWVAYHQYYQRPIGVLLKKSAA	CYP11A1	P05108	MAD	-1	1	FALSE
HTP0393A	Plasma	SciLifeLab peptide array	CYP17A1_HPRR670228	PFLPRHGHMHNNFFKLQKKYGPIYSVRMGTKTTVIVGHHQLAKEVLIKKGKDFSGRPQMATLDIASNNRKGIAFADSGAHWQLHRRLAMATFALFKDGDQKLEKIICQEISTLCDMLATHNGQSIDISFPVFVAVTNVISL	CYP17A1	P05093	MAD	0	0	FALSE
HTP0393A	Plasma	SciLifeLab peptide array	CYP1A2_HPRR2760237	YQDFDKNSVRDITGALFKHSKKGPRASGNLIPQEKIVNLVNDIFGAGFDTVTTAISWSLMYLVTKPEIQRK	CYP1A2	P05177	MAD	2	1.1	TRUE
HTP0393A	Plasma	SciLifeLab peptide array	CYP21A2_HPRR3440127	LIGGTETTANTLSWAVVFLLHHPEIQQRLQEELDHELGPGASSSRVPYKDRARLPLLNATIAEV	CYP21A2	P08686	MAD	-1	1	FALSE
HTP0393A	Plasma	SciLifeLab peptide array	CYP21A2_HPRR3440129	GLTQKFGPIYRLHLGLQDVVVLNSKRTIEEAMVKKWADFAGRPEPLTYKLVSRNYPDLSLGDYSLLW	CYP21A2	P08686	MAD	0	0	FALSE
HTP0393A	Plasma	SciLifeLab peptide array	CYP2D6_HPRR3440145	EYDDPRFLRLLDLAQEGLKEESGFLREVLNAVPVLLHIPALAGKVLRFQKAFLTQLDELLTEHRMTWDPAQPPRDLTE	CYP2D6	P10635	MAD	2	2	FALSE
HTP0393A	Plasma	SciLifeLab peptide array	CYP2D6_HPRR3440146	KGTTLITNLSSVLKDEAVWKKPFRF	CYP2D6	P10635	MAD	-1	6.1	FALSE
HTP0393A	Plasma	SciLifeLab peptide array	DARS_HPRR2370049	DKYPLAVRPFYTMPDPRNPKQSNSYDMFMRGEEILSGAQRIHDPQLLTERALHHGIDLEKIKAYIDSFRFGAPPHAGGGIGLERVTMLFLGLHNVRQTSMFPRD	DARS	P14868	MAD	2	5	FALSE
HTP0393A	Plasma	SciLifeLab peptide array	DARS_HPRR2370051	LHVQKIYVISLAEPRLPLQLDDAVRPEAEGEEEGRATVNQDTRLDNRVIDLRTSTSQAVFRLQSGICHLFRETLINKGFVEIQTPKIISAASEGGANVFTVSYFKNNAYLAQSPQLYKQMCICAD	DARS	P14868	MAD	2	10	FALSE
HTP0393A	Plasma	SciLifeLab peptide array	DBT_HPRR2550879	YVCFFGYPSFKYSHPHHFLKTTAALRGQVVQFKLSDIGEGIREVTVKEWYVKEGDTVSQFDSICEVQSDKASVTI	DBT	P11182	MAD	0	2	FALSE
HTP0393A	Plasma	SciLifeLab peptide array	DBT_HPRR2550880	VGKPLVDIETEALKDSEEDVVETPAVSHDEHTHQEIKGRKTLATPAVRRLAMENNIKLSEVVGSGKDGRILKEDILNYLEKQ	DBT	P11182	MAD	8	10.1	FALSE
HTP0393A	Plasma	SciLifeLab peptide array	DBT_HPRR2550882	LQFPILNASVDENCQNITYKASHNIGIAMDTEQGLIVPNVKNVQICSIFDIATELNRLQKLGSVGQLSTTDLTGGTFTLSNIGSIGGTFAKPVIMPPEVAIGA	DBT	P11182	MAD	-1	7.9	FALSE
HTP0393A	Plasma	SciLifeLab peptide array	DLAT_HPRR3050438	LLPALSPTMTMGTVQRWEKKVGEKLSEGDLLAEIETDKATIGFEVQEEGYLAKILVPEGTRDVPLGTPLCIIVEKEADISAFADYRPTEVTDLKPQVPPPT	DLAT	P10515	MAD	76	49.5	TRUE
HTP0393A	Plasma	SciLifeLab peptide array	DLST_HPRR140690	QNTCAMLTTFNEIDMSNIQEMRARHKEAFLKKHNLKLGFMSAFVKASAFALQEQPVVNAVIDDTTKEVVYRDYIDISVAVATPRGLVVPVIRNVEAMNFADIERTITELGEKARKNELAIEDMDGGTFTISNGGVFGSLFGTPII	DLST	P36957	MAD	1	1	FALSE
HTP0393A	Plasma	SciLifeLab peptide array	DLST_HPRR4210012	PLCVSGVQPLALRLPEGELPSRETFPACINNS	DLST	P36957	MAD	-1	0.1	FALSE
HTP0393A	Plasma	SciLifeLab peptide array	DPF2_HPRR2250142	SFPSIKPDTDQTLKKEGLISQDGSSLEALLRTDPLEKRGAPDPRVDDDSLGEFPVTNSRARKRILEPDDFLDDLDDEDYEEDTPKRRGKGKSKGKGVGS	DPF2	Q92785	MAD	0	11.1	FALSE
HTP0393A	Plasma	SciLifeLab peptide array	DPF2_HPRR3890698	AEEEGEDKEDSQPPTPVSQRSEEQKSKKGPDGLALPNNY	DPF2	Q92785	MAD	-1	1	FALSE
HTP0393A	Plasma	SciLifeLab peptide array	DSC1_HPRR1950849	SCTGTLVVHLDDYNDHAPQIDKEVTICQNNEDFAVLKPVDPDGPENGPPFQFFLDNSASKNWNIEEKDGKTAILRQRQNLDYNYYSVPIQIKDRHGLVATHMLTVRVCDCSTPSECRMKDKSTR	DSC1	Q08554	MAD	0	5.6	FALSE
HTP0393A	Plasma	SciLifeLab peptide array	DSG1_HPRR1370121	SLQLSIGVRNKAEFHHSIMSQYKLKASAISVTVLNVIEGPVFRPGSKTYVVTGNMGSNDKVGDFVATDLDTGRPSTTVRYVMGNNPADLLAVDSRTGKLTLKNKVTKEQYNMLGGKYQGTILSIDDNLQRTCTGT	DSG1	Q02413	MAD	1	2	FALSE
HTP0393A	Plasma	SciLifeLab peptide array	DSG1_HPRR4180926	EPVPECSDGAIHSWAVEGPQPEPRDITTVIPQIPPDNANIIECIDNSGVYTNEYGGREMQDLGGGERMTGFELTEGVKTSGMPEICQEYSG	DSG1	Q02413	MAD	2	10.5	FALSE
HTP0393A	Plasma	SciLifeLab peptide array	DSG3_HPRR3120202	FRPASKTFTVQKGISSKKLVDYILGTYQAIDEDTNKAASNVKYVMGRNDGGYLMIDSKTAEIKFVKNMNRDSTFIVNKTITAEVLAIDEYTGKTSTGTVYVRVPDFND	DSG3	P32926	MAD	7	6	TRUE
HTP0393A	Plasma	SciLifeLab peptide array	DSG3_HPRR3120203	SSPSVVVSARTLNNRYTGPYTFALEDQPVKLPAVWSITTLNATSALLRAQEQIPPGVYHISLVLTDSQNNRCEMPRSLTLEVCQCDNRGICGTSY	DSG3	P32926	MAD	0	1	FALSE
HTP0393A	Plasma	SciLifeLab peptide array	DST_HPRR2620326	KPRCQNVAEDMDIQLCASILNENSDENENINTMILLDKMHSCSSLEKQQRVNVVQLASPSENNLVTEKSNLPEYTTEIAGKSKENLLNHE	DST	Q03001	MAD	3	28.3	FALSE
HTP0393A	Plasma	SciLifeLab peptide array	DST_HPRR2620328	MLPGEHQQVLSNLQSRFEDFLEDSQESQVFSGSDITQLEKEVNVCKQYYQELLKSAEREEQEESVYNLYISEVRNIRLRLENCEDRLIRQIRTPLERDDLHESVF	DST	Q03001	MAD	84	4.2	TRUE
HTP0393A	Plasma	SciLifeLab peptide array	EGFR_HPRR290109	QQGFFSSPSTSRTPLLSSLSATSNNSTVACIDRNGLQSCPIKEDSFLQRYSSDPTGALTEDSIDDTFLPVPEYINQSVPKRPAGSVQNPVYHNQPLNPAPSRDPHYQDPHSTAVGNPEYLNTVQPTCVNSTFDSPAHWAQKGSHQISLD	EGFR	P00533	MAD	5	25.1	FALSE
HTP0393A	Plasma	SciLifeLab peptide array	ENO3*_HPRR3360053	DGTENKSKFGANAILGVSLAVCKAG	ENO3*	P13929;P09104;P06733	MAD	0	0	FALSE
HTP0393A	Plasma	SciLifeLab peptide array	ENO3*_HPRR4290181	QACKLAQENGWGVMVSHRSGETEDTFIADLVVGLCTGQIKTGAPCRSERLAKYNQLMRIEEE	ENO3*	P13929;P09104;P06733	MAD	0	0.1	FALSE
HTP0393A	Plasma	SciLifeLab peptide array	ENO3*_HPRR4370068	LKNVIKEKYGKDATNVGDEGGFAPNIL	ENO3*	P13929;P09104;P06733	MAD	0	10.1	FALSE
HTP0393A	Plasma	SciLifeLab peptide array	ENO3_HPRR252476	ALELLKTAIQAAGYPDKVVIGMDVAASEFYRNGKYDLDFKSPDDPARHITGEKLGELYKSFIKNYPVVSIEDPFDQDDWATWTSFLSGVNIQIVGDDLTVTN	ENO3	P13929	MAD	1	6	FALSE
HTP0393A	Plasma	SciLifeLab peptide array	F12_HPRR350057	YHKCTHKGRPGPQPWCATTPNFDQDQRWGYCLEPKKVKDHCSKHSPCQKGGTCVNMPSGPHCLCPQHLTGNHCQKEKCFEPQLLRFFHKNEIWYRTEQAAVARCQCKGPDA	F12	P00748	MAD	-1	-0.9	FALSE
HTP0393A	Plasma	SciLifeLab peptide array	F2_HPRR350027	VRRQECSIPVCGQDQVTVAMTPRSEGSSVNLSPPLEQCVPDRGQQYQGRLAVTTHGLPCLAWASAQAKALSKHQDFNSAVQLVENFCRNPDGDEEGVWCYVAGKPGDFGYCDLNY	F2	P00734	MAD	0	4	FALSE
HTP0393A	Plasma	SciLifeLab peptide array	F2_HPRR3790030	EGVWCYVAGKPGDFGYCDLNYCEEAVEEETGDGLDEDSDRAIEGRTATSEYQTFFNPRTFGSGEADCGLRPLFEKKSLE	F2	P00734	MAD	6	22.5	FALSE
HTP0393A	Plasma	SciLifeLab peptide array	F2_HPRR3790031	FEALESSTATDVFWAKYTACETARTPRDKLAACLEGNCAEGLGTNYRGHVNITRSGIECQLWRSRYPHKPEINSTTHPGADLQ	F2	P00734	MAD	6	7.6	FALSE
HTP0393A	Plasma	SciLifeLab peptide array	F8_HPRR232500	FTQPLYRGELNEHLGLLGPYIRAEVEDNIMVTFRNQASRPYSFYSSLISYEEDQRQGAEPRKNFVKPNETKTYFWKVQHHMAPTKDEFDCKAWAYFSDVDLEKDVHSGLIGPLLVCHTNTLNPAHGRQVTVQEFAL	F8	P00451	MAD	1	4.1	FALSE
HTP0393A	Plasma	SciLifeLab peptide array	F8_HPRR232926	ESKAISDAQITASSYFTNMFATWSPSKARLHLQGRSNAWRPQVNNPKEWLQVDFQKTMKVTGVTTQGVKSLLTSMYVKEFLISSSQDGHQWTLFFQNGKVKVFQGNQDSFTPVVNSLDPPLLTRYLRIHPQSWVHQIALRMEVLGCEA	F8	P00451	MAD	0	0	FALSE
HTP0393A	Plasma	SciLifeLab peptide array	FARS2_HPRR2010057	GTPLFSVYDNLSPVVTTWQNFDSLLIPADHPSRKKGDNYYLNRTHMLRAHTSAHQWDLLHAGLDAFLVVGDVYRRDQIDSQHYPIFHQLEAVRLFSKHELFAGIKDGES	FARS2	O95363	MAD	3	1	TRUE
HTP0393A	Plasma	SciLifeLab peptide array	FARSA_HPRR400146	EVIEAELRSTKHWELTAEGEEIAREGSHEARVFRSIPPEGLAQSELMRLPSGKVGFSKAMSNKWIRVDKSAADGPRVFRVVDSMEDEVQRRLQLVRGGQAEKLGEKERSELRKRKLLAEVTLKTYWVSKG	FARSA	Q9Y285	MAD	-1	1	FALSE
HTP0393A	Plasma	SciLifeLab peptide array	FHL1_HPRR252319	RFTAVEDQYYCVDCYKNFVAKKCAGCKNPITGFGKGSSVVAYEGQSWHDYCFHCKIRRAPPLSNN	FHL1	Q13642	MAD	-1	-1	FALSE
HTP0393A	Plasma	SciLifeLab peptide array	FLG_HPRR2551092	SERWSGSASRNHLGSAWEQSRDGSRHPGSHHEDRAGHGHSADSSRQSGTRHTESSSRGQAASSHEQARSSAGERHGSRHQLQSA	FLG	P20930	MAD	1	12	FALSE
HTP0393A	Plasma	SciLifeLab peptide array	FLG_HPRR2551093	SADSSRQSGTPHAETSSGGQAASSHEQARSSPGERHGSRHQQSADSSRHSGIPRRQASSAVRDSGHWGSSGSQASDSEGHSEESDTQSVSGHGQDGPHQQSHQESAR	FLG	P20930	MAD	-1	1	FALSE
HTP0393A	Plasma	SciLifeLab peptide array	FLG_HPRR2551094	RKRLSERLEEKEDNEEGVYDYENTGRMTQKWIQSGHIATYYTIQDEAYDTTDSLLEENKIYERSRSSDGKSSSQVNRSRHENTSQVPLQESR	FLG	P20930	MAD	1	14	FALSE
HTP0393A	Plasma	SciLifeLab peptide array	FLNA_HPRR232447	VICVRFGGEHVPNSPFQVTALAGDQPSVQPPLRSQQLAPQYTYAQGGQQTWAPERPLVGVNGLDVTSLRPFDLVIPFTIKKGEITGEVRMPSGKVAQPTITDNKDGTVTVRYAPSEAGLHEMDIRYDNMHIPGSPLQFYVDYVNCGHVT	FLNA	P21333	MAD	0	2	FALSE
HTP0393A	Plasma	SciLifeLab peptide array	FLNB_HPRR1310070	HGKVGEAGLLSVDCSEAGPGALGLEAVSDSGTKAEVSIQNNKDGTYAVTYVPLTAGMYTLTMKYGGELVPHFPARVKVEPAVDTSRIKVFGPGIEGKDVFREATTDFTV	FLNB	O75369	MAD	3	7.1	FALSE
HTP0393A	Plasma	SciLifeLab peptide array	FLNC_HPRR1310054	DPVPKSPFVVNVAPPLDLSKIKVQGLNSKVAVGQEQAFSVNTRGAGGQGQLDVRMTSPSRRPIPCKLEPGGGAEAQAVRYMPPEEGPYKVDITYDGHPVPGSPFAVEGVLPPDPSKVC	FLNC	Q14315	MAD	5	17.2	FALSE
HTP0393A	Plasma	SciLifeLab peptide array	FLNC_HPRR1310055	HSLHETSTVLVETVTKSSSSRGSSYSSIPKFSSDASKVVTRGPGLSQAFVGQKNSFTVDCSKAGTNMMMVGVHGPKTPCEEVYVKHMGNRVYNVTYTVKEKGDY	FLNC	Q14315	MAD	0	2	FALSE
HTP0393A	Plasma	SciLifeLab peptide array	FN1_HPRR2050095	AQQMVQPQSPVAVSQSKPGCYDNGKHYQINQQWERTYLGNALVCTCYGGSRGFNCESKPEAEETCFDKYTGNTYRVGDTYERPKDSMIWDCTCIGAGRGRISCTIANRCHEGGQSYKIGDTWRRPHETGGYMLECVCLGNGKGEW	FN1	P02751	MAD	-2	1	FALSE
HTP0393A	Plasma	SciLifeLab peptide array	FN1_HPRR2050096	HEEICTTNEGVMYRIGDQWDKQHDMGHMMRCTCVGNGRGEWTCIAYSQLRDQCIVDDITYNVNDTFHKRHEEGHMLNCTCFGQGRGRWKCDPVDQCQDSETGTFYQIGDSWEKYVHGVRYQCYCYGRGIG	FN1	P02751	MAD	1	2	FALSE
HTP0393A	Plasma	SciLifeLab peptide array	FTCD_HPRR2280077	MRLPKNIPEEKDRRTAALQEGLRRAVSVPLTLAETVASLWLALQELARCGNLACRSDLQVAAKALEMGVFGAYFNVLINLRDITDEAFKDQIHHRV	FTCD	O95954	MAD	1	2	FALSE
HTP0393A	Plasma	SciLifeLab peptide array	FTCD_HPRR2890163	GVSVDECVLCAQAFGQRLAEELDVPVYLYGEAARMDSRRTLPAIRAGEYEALPKKLQQADWAPDFGPSSF	FTCD	O95954	MAD	45	115.6	FALSE
HTP0393A	Plasma	SciLifeLab peptide array	FTCD_HPRR2890164	MSQLVECVPNFSEGKNQEVIDAISGAITQTPGCVLLDVDAGPSTNRTVYTFVGPPECVVEGALNAARVASRLIDMSRHQGEH	FTCD	O95954	MAD	4	4.1	FALSE
HTP0393A	Plasma	SciLifeLab peptide array	FTCD_HPRR2890165	TKEQAHRIALNLREQGRGKDQPGRLKKVQGIGWYLDEKNLAQVSTNLLDFEVTALHTVYEETCREAQELSLPVVGSQLVGLVPLKALLD	FTCD	O95954	MAD	0	1	FALSE
HTP0393A	Plasma	SciLifeLab peptide array	G6PC2_HPRR4090002	INSEMFLLSCRGGNNYTLSF	G6PC2	Q9NQR9	MAD	2	2	FALSE
HTP0393A	Plasma	SciLifeLab peptide array	GAD1_HPRR2920425	QSSKNLLSCENSDRDARFRRTETDFSNLFARDLLPAKNGEEQTVQFLLEVVDILLNYVRKTFDRS	GAD1	Q99259	MAD	0	1	FALSE
HTP0393A	Plasma	SciLifeLab peptide array	GAD1_HPRR2920426	SSATSSNAGADPNTTNLRPTTYDTWCGVAHGCTRKLGLKICGFLQRTNSLEEKSRLVSAFKER	GAD1	Q99259	MAD	-1	0	FALSE
HTP0393A	Plasma	SciLifeLab peptide array	GAD2_HPRR3020281	SGFWSFGSEDGSGDSENPGTARAWCQVAQKFTGGIGNKLCALLYGDAEKPAESGGSQPPRAAARKAACACDQKPCSCSKVDVNYAFLHATDLLP	GAD2	Q05329	MAD	-1	-0.9	FALSE
HTP0393A	Plasma	SciLifeLab peptide array	GAD2_HPRR3890856	STKVIDFHYPNELLQEYNWELADQPQNLEEILMHCQTTLKYAIKTGHPRY	GAD2	Q05329	MAD	-1	0	FALSE
HTP0393A	Plasma	SciLifeLab peptide array	GARS_HPRR2440240	KLMSDKKCSVEKKSEMESVLAQLDNYGQQELADLFVNYNVKSPITGNDLSPPVSFNLMFKTFIGPGGNMPGYLRPETAQGIFLNFKRLLEFNQGKLPFAAAQI	GARS	P41250	MAD	1	3	FALSE
HTP0393A	Plasma	SciLifeLab peptide array	GARS_HPRR2440243	LPLSQNQEFMPFVKELSEALTRHGVSHKVDDSSGSIGRRYARTDEIGVAFGVTIDFDTVNKTPHTATLRDRDSMRQIRAEISELPSIVQDLANGNITWADVEARYPLFEG	GARS	P41250	MAD	1	7.1	FALSE
HTP0393A	Plasma	SciLifeLab peptide array	GIF_HPRR3050322	LFGQVLKDIVEKISMKIKDNGIIGDIYSTGLAMQALSVTPEPSKKEWNCKKTTDMILNEIKQGKFHNPMSIAQILPSLKGKTYLDVPQVTCSPDHEVQPTLPSNP	GIF	P27352	MAD	-1	1.1	FALSE
HTP0393A	Plasma	SciLifeLab peptide array	GIF_HPRR3050324	TSSAYPNPSILIAMNLAGAYNLKAQKLLTYQLMSSDNNDLTIGQLGLTIMALTSSCRDPGDKVSILQRQMENWAPSSPNAEASAFYGPSLAILALCQKNS	GIF	P27352	MAD	1	1.1	FALSE
HTP0393A	Plasma	SciLifeLab peptide array	GLRA1_HPRR2140062	LLRFRRKRRHHKEDEAGEGRFNFSAYGMGPACLQAKDGISVKGANNSNTTNPPPAPSKSPEEMRKLFIQRAKKIDK	GLRA1	P23415	MAD	0	2.1	FALSE
HTP0393A	Plasma	SciLifeLab peptide array	GOLGB1_HPRR1951658	RLSGLANVVLHELSGDDDTDQNMRAPLDPELHQESDMEFNNTTQEDVQERLAYAEQLVVELKDIIRQKDVQLQQKDEALQEERKAADNKIKKLKLHAKAKLTSLNKYIEEMKAQGGTVLPTEPQSEEQLSKHD	GOLGB1	Q14789	MAD	0	-1	TRUE
HTP0393A	Plasma	SciLifeLab peptide array	GOLGB1_HPRR1951659	KHDNQTNVTEEGTQSIPGETEEQDSLSMSTRPTCSESVPSAKSANPAVSKDFSSHDEINNYLQQIDQLKERIAGLEEEKQKNKEFSQTLENEKNTLLSQISTKDGELKMLQEEVTKMNLLNQQIQEELS	GOLGB1	Q14789	MAD	5	6.2	FALSE
HTP0393A	Plasma	SciLifeLab peptide array	GPR62_HPRR2770122	PVRLALGRLSRRALPGPVRACTPQAWHPRALLQCLQRPPEGPAVGPSEAPEQTPELAGGRSPAYQGPPESSL	GPR62	Q9BZJ7	MAD	46	39.3	TRUE
HTP0393A	Plasma	SciLifeLab peptide array	GYPA_HPRR2110422	TSSSVTKSYISSQTNDTHKRDTYAATPRAHEVSEISVRTVYPPEEETGERVQLAHHFSEP	GYPA	P02724	MAD	2	3	FALSE
HTP0393A	Plasma	SciLifeLab peptide array	GYPE*_HPRR3290141	TTGVAMHTSTSSSVTKSYISSQTN	GYPE*	P15421;P06028;P02724	MAD	0	0	FALSE
HTP0393A	Plasma	SciLifeLab peptide array	HARS_HPRR3010485	MAERAALEELVKLQGERVRGLKQQKASAELIEEEVAKLLKLKAQLGPDESKQKFVLKTPKGTRD	HARS	P12081	MAD	0	6.1	FALSE
HTP0393A	Plasma	SciLifeLab peptide array	HARS_HPRR4040036	DGVIKLRSVTSREEVDVRREDLVEEIKRRTGQPLCIC	HARS	P12081	MAD	1	3.1	FALSE
HTP0393A	Plasma	SciLifeLab peptide array	HDC_HPRR1320013	LKGPNCLTENVLKEIAKAGRLFLIPATIQDKLIIRFTVTSQFTTRDDILRDWNLIRDAATLILSQHCTSQPSPRVGNLISQIRGARAWACGTSLQSVSGAGDDPVQARKIIKQPQRVGAGPMKRENGLHLETLLDPVDDCFSE	HDC	P19113	MAD	-1	0	FALSE
HTP0393A	Plasma	SciLifeLab peptide array	HDC_HPRR1320014	PALTSWPSLLGDMLADAINCLGFTWASSPACTELEMNVMDWLAKMLGLPEHFLHHHPSSQGGGVLQSTVSESTLIALLAARKNKILEMKTSEPDADESCLNARLVAYASDQAHSSVEK	HDC	P19113	MAD	-2	4.1	FALSE
HTP0393A	Plasma	SciLifeLab peptide array	HINT2_HPRR2470372	GQVRGAAGVTDGNEVAKAQQATPGGAAPTIFSRILDKSLPADILYEDQQCLVFRDVAPQAPVHFLVIPKKP	HINT2	Q9BX68	MAD	0	3	FALSE
HTP0393A	Plasma	SciLifeLab peptide array	HINT2_HPRR2470373	IPRISQAEEEDQQLLGHLLLVAKQTAKAEGLGDGYRLVINDGKLGAQSVYHLHIHVLGGRQLQWP	HINT2	Q9BX68	MAD	-1	0	FALSE
HTP0393A	Plasma	SciLifeLab peptide array	HMGCR_HPRR650031	MAGSIGGYNAHAANIVTAIYIACGQDAAQNVGSSNCITLMEASGPTNEDLYISCTMPSIEIGTVGGGTNLLPQQACLQMLGVQGACKDNPGENARQLARIVCGTVMAGELSLMAALAAGHLVKSHMIHNRSKINLQDLQG	HMGCR	P04035	MAD	0	2.1	FALSE
HTP0393A	Plasma	SciLifeLab peptide array	IAPP_HPRR3830128	LVHSSNNFGAILSSTNVGSNTYGKRNAVEVLKREPLNYLP	IAPP	P10997	MAD	2	1	TRUE
HTP0393A	Plasma	SciLifeLab peptide array	IARS_HPRR2470884	NWYVRMNRRRLKGENGMEDCVMALETLFSVLLSLCRLMAPYTPFLTELMYQNLKVLIDPVSVQDKDTLSIHYLMLPRVREELIDKKTESAVSQMQSVIEL	IARS	P41252	MAD	0	4.3	FALSE
HTP0393A	Plasma	SciLifeLab peptide array	IARS_HPRR2470886	AREVINRIQKLRKKCNLVPTDEITVYYKAKSEGTYLNSVIESHTEFIFTTIKAPLKPYPVSPSDKVLIQEKTQLKGSELEITLTRGSSLPGPACAYVNLNICANGSEQGGVLL	IARS	P41252	MAD	0	1	FALSE
HTP0393A	Plasma	SciLifeLab peptide array	ICA1_HPRR1510003	DELLDMKSEEGACLGPVAGTPEPEGADKDDLLLLSEIFNASSLEEGEFSKEWAAVFGDGQVKEPVPTMALGEPDPKAQTGSGFLPSQLLDQNMKDLQASLQEPAKAASDLTAWFSLFADLDPLSNPDAVGKTDKEHELL	ICA1	Q05084	MAD	12	78.4	FALSE
HTP0393A	Plasma	SciLifeLab peptide array	ICA1_HPRR4160047	HESFKGYQPYEFTTLKSLQDPMKKLVEKEEKKKINQQESTDAAVQEPSQLISLEEENQRKESSSFK	ICA1	Q05084	MAD	-1	38.8	FALSE
HTP0393A	Plasma	SciLifeLab peptide array	IFIH1_HPRR330271	GWTREFVEALRRTGSPLAARYMNPELTDLPSPSFENAHDEYLQLLNLLQPTLVDKLLVRDVLDKCMEEELLTIEDRNRIAAAENNGNESGVRELLKRIVQKENWFSAFLNVLRQTGNNELVQELTGSDCSESNAEIENLSQVDGPQVEEQ	IFIH1	Q9BYX4	MAD	0	4.1	FALSE
HTP0393A	Plasma	SciLifeLab peptide array	IFNA21*_HPRR3360011	MNADSILAVKKYFRRITLYLTEKKYSPCA	IFNA21*	P01568;P05014;P01567;P01566;P05015;P01571;P01570;P01569;P05013;P01562;P01563;P32881	MAD	-1	1	FALSE
HTP0393A	Plasma	SciLifeLab peptide array	IFNA21*_HPRR3360040	AEAISVLHEVIQQTFNLFSTKDSSVA	IFNA21*	P01568;P05014;P01567;P01566;P05015;P01571;P01570;P01569;P05013;P01562;P01563;P32881	MAD	-1	-1	FALSE
HTP0393A	Plasma	SciLifeLab peptide array	IFNB1_HPRR2760323	ETIVENLLANVYHQINHLKTVLEEKLEKEDFTRGKLMSSLHLKRYYGRILHYLKAKEYSHCAWTIVRVEILRNFYFINR	IFNB1	P01574	MAD	1	1	FALSE
HTP0393A	Plasma	SciLifeLab peptide array	IFNB1_HPRR2760324	YNLLGFLQRSSNFQCQKLLWQLNGRLEYCLKDRMNFDIPEEIKQLQQFQKEDAALTIYEMLQNIFAIFRQDSSSTGWN	IFNB1	P01574	MAD	0	2	FALSE
HTP0393A	Plasma	SciLifeLab peptide array	IFNL1_HPRR3790181	PVPTSKPTTTGKGCHIGRFKSLSP	IFNL1	Q8IU54	MAD	-1	1.2	FALSE
HTP0393A	Plasma	SciLifeLab peptide array	IFNL3*_HPRR3260137	AVPVARLRGALPDARGCHIAQFKSLSPQE	IFNL3*	Q8IZI9;Q8IZJ0	MAD	-2	-0.9	FALSE
HTP0393A	Plasma	SciLifeLab peptide array	IFNW1*_HPRR3360041	MLLAQMRRISLFSCLKDRHDFRFPQE	IFNW1*	P05000;P01568;P05014;P01567;P01566;P05015;P01571;P01570;P01569;P05013;P01562;P01563;P32881	MAD	-1	2	FALSE
HTP0393A	Plasma	SciLifeLab peptide array	IFNW1_HPRR3780122	AWNMTLLDQLHTGLHQQLQHLETCLLQVVGEGESAGAISSPALTLRRYFQGIRVYLKEK	IFNW1	P05000	MAD	-1	0	FALSE
HTP0393A	Plasma	SciLifeLab peptide array	IL17A_HPRR2760112	NPGCPNSEDKNFPRTVMVNLNIHNRNTNTNPKRSSDYYNRSTSPWNLHRNEDPERYPSVIWEAKCRHLGCIN	IL17A	Q16552	MAD	1	1	FALSE
HTP0393A	Plasma	SciLifeLab peptide array	IL17A_HPRR4290151	EILVLRREPPHCPNSFRLEKILVS	IL17A	Q16552	MAD	-1	0	FALSE
HTP0393A	Plasma	SciLifeLab peptide array	IL17F_HPRR2570223	RKIPKVGHTFFQKPESCPPVPGGSMKLDIGIINENQRVSMSRNIESRSTSPWNYTVTWDPNRYPSEVVQAQCRNLGCINAQGKE	IL17F	Q96PD4	MAD	0	23.4	FALSE
HTP0393A	Plasma	SciLifeLab peptide array	IL17F_HPRR4110234	QQETLVVRRKHQGCSVSFQLEKVLVTV	IL17F	Q96PD4	MAD	-1	0	FALSE
HTP0393A	Plasma	SciLifeLab peptide array	IL22_HPRR1060056	PISSHCRLDKSNFQQPYITNRTFMLAKEASLADNNTDVRLIGEKLFHGVSMSERCYLMKQVLNFTLEEVLFPQSDRFQPYMQEVVPFLARLSNRLSTCHIEGDDLHIQRNVQKLKDTVKKLGESGEIKAIGELDLLFMSLRNA	IL22	Q9GZX6	MAD	1	2	FALSE
HTP0393A	Plasma	SciLifeLab peptide array	INS_HPRR380034	SHLVEALYLVCGERGFFYTPKTRREAEDLQVGQVELGGGPGAGSLQPLALEGSLQKRGIVEQCCTSICSLYQLENYC	INS	P01308	MAD	-1	2	FALSE
HTP0393A	Plasma	SciLifeLab peptide array	INSM2_HPRR3450147	KHLSTHEAGSARALAPGFGSERGAPLAFACPLCGAHFPTADIREKHRLWHAVREELLLPALAGAPPETSGPSGPSDGSAQQIFSCKHCPSTF	INSM2	Q96T92	MAD	28	53.4	FALSE
HTP0393A	Plasma	SciLifeLab peptide array	INSM2_HPRR3450148	AEGKENSRIERTADQHPQARDSSGADQHPDSAPRQGLQVLTHPEPPLPQGPYTEGVLGRRVPVPGSTSGGRGSEIFVCP	INSM2	Q96T92	MAD	-1	2	FALSE
HTP0393A	Plasma	SciLifeLab peptide array	KCND1_HPRR230897	SSQPVGPGSLLSSCCPRRAKRRAIRLANSTASVSRGSMQELDMLAGLRRSHAPQSRSSLNAKPHDSLDLNCDSRDFVAAIISIPTPPANTPDESQPSSPGGGGRAGSTLRNSSLGT	KCND1	Q9NSA2	MAD	0	1.1	FALSE
HTP0393A	Plasma	SciLifeLab peptide array	KCND1_HPRR230898	NTLDRYPDTLLGSSEKEFFYDADSGEYFFDRDPDMFRHVLNFYRTGRLHCPRQECIQAFDEELAFYGLVPELVGDCCLEEYRDRKKENAERLAEDEEAEQ	KCND1	Q9NSA2	MAD	1	8.1	FALSE
HTP0393A	Plasma	SciLifeLab peptide array	KCND1_HPRR4320417	KTTCHEFTDELTFSEALGAVSPGGRTSRSTSVSSQPVGPGSLLSSCCPRRAKRRAIRLANSTASVSRGSM	KCND1	Q9NSA2	MAD	0	1	FALSE
HTP0393A	Plasma	SciLifeLab peptide array	KCNJ10_HPRR4030424	EFTPAISLSASGKYIADFSLFDQVVKVASPSGLRDSTVRYGDPEKLKLEESLREQAEKEGSALSVRISNV	KCNJ10	P78508	MAD	0	4	FALSE
HTP0393A	Plasma	SciLifeLab peptide array	KCNJ10_HPRR4030425	MTSVAKVYYSQTTQTESRPLMGPGIRRRRVLTKDGRSNVRMEHIADKRFLYLKDLWTTFIDMQWRY	KCNJ10	P78508	MAD	0	10.9	FALSE
HTP0393A	Plasma	SciLifeLab peptide array	KCNJ10_HPRR4030426	VAVAHGDLLELDPPANHTPCVVQVHTLTG	KCNJ10	P78508	MAD	0	1.1	FALSE
HTP0393A	Plasma	SciLifeLab peptide array	KCNJ11_HPRR3690159	TVKVPTPLCTARQLDEDHSLLEALTLASARGPLRKRSVPMAKAKPKFSISPDSLS	KCNJ11	Q14654	MAD	-2	0.1	FALSE
HTP0393A	Plasma	SciLifeLab peptide array	KCNJ11_HPRR4080108	YVLTRLAEDPAKPRYRARQRRARFVSKKGNCNVAH	KCNJ11	Q14654	MAD	-2	0	FALSE
HTP0393A	Plasma	SciLifeLab peptide array	KCNJ11_HPRR650098	RLCFMLRVGDLRKSMIISATIHMQVVRKTTSPEGEVVPLHQVDIPMENGVGGNSIFLVAPLIIYHVIDANSPLYDLAPSDLHHHQDLEIIVILEGVVETTGIT	KCNJ11	Q14654	MAD	0	0	FALSE
HTP0393A	Plasma	SciLifeLab peptide array	KEL_HPRR1952469	PRPCETSVCLDLRDHYLASGNTSVAPCTDFFSFACGRAKETNNSFQELATKNKNRLRRILEVQNSWHPGSGEEKAFQFYNSCMDTLAIEAAGTGPLRQVIEELGGWRISGKWT	KEL	P23276	MAD	0	1	FALSE
HTP0393A	Plasma	SciLifeLab peptide array	KEL_HPRR1952470	DQLKEMAPAIDWLSCLQATFTPMSLSPSQSLVVHDVEYLKNMSQLVEEMLLKQRDFLQSHMILGLVVTLSPALDSQFQEARRKLSQKLRELTEQPPMPARPRWMKCVEETGTFFEPTLAALFVREAFGPSTRSAAMKL	KEL	P23276	MAD	0	2	FALSE
HTP0393A	Plasma	SciLifeLab peptide array	LAD1_HPRR1350086	SPRTISFRMKPKKENSETTLTRSASMKLPDNTVKLGEKLERYHTAIRRSESVKSRGLPCTELFVAPVGVASKRHLFEKELAGQSRAEPASSRKENLRLSGVVTSRLNLWISRTQESGDQDPQEAQKASSATERTQWGQKSDSSL	LAD1	O00515	MAD	0	1.1	FALSE
HTP0393A	Plasma	SciLifeLab peptide array	LAMP2_HPRR232315	LELNLTDSENATCLYAKWQMNFTVRYETTNKTYKTVTISDHGTVTYNGSICGDDQNGPKIAVQFGPGFSWIANFTKAASTYSIDSVSFSYNTGDNTTFPDAEDKGILTVDELLAIRIPLNDLFRCNSLSTLEKNDVVQHYWDVLVQA	LAMP2	P13473	MAD	-1	0.1	FALSE
HTP0393A	Plasma	SciLifeLab peptide array	LAMP2_HPRR232316	GTVSTNEFLCDKDKTSTVAPTIHTTVPSPTTTPTPKEKPEAGTYSVNNGNDTCLLATMGLQLNITQDKVASVININPNTTHSTGSCRSHTALLRLNSSTIKYLDFVFAVKNENRFYLKEVNISMYLVNGSVFSIANNNLSY	LAMP2	P13473	MAD	-1	-0.8	FALSE
HTP0393A	Plasma	SciLifeLab peptide array	LAMP2_HPRR2810012	ASTYSIDSVSFSYNTGDNTTFPDAEDKGILTVDELLAIRIPLNDLFRCNSLSTLEKNDVVQHYWDVLV	LAMP2	P13473	MAD	0	6.1	FALSE
HTP0393A	Plasma	SciLifeLab peptide array	LAMP2_HPRR2810014	LGSSYMCNKEQTVSVSGAFQINTFDLRVQPFNVTQGKYSTAQDCSADDDNF	LAMP2	P13473	MAD	-1	-1	FALSE
HTP0393A	Plasma	SciLifeLab peptide array	LBR_HPRR3410125	MPSRKFADGEVVRGRWPGSSLYYEVEILSHDSTSQLYTVKYKDGTELELKENDIKPLTSFRQRKGGSTSSS	LBR	Q14739	MAD	0	1	FALSE
HTP0393A	Plasma	SciLifeLab peptide array	LBR_HPRR3410127	EARREVEVKLTPLILKPFGNSISRYNGEPEHIERNDAPHKNTQEKFNLSQESSYIATQYSLRPRREEVKLKEIDSKEEKYVAKELAVRTF	LBR	Q14739	MAD	-1	23.1	FALSE
HTP0393A	Plasma	SciLifeLab peptide array	LRP4_HPRR1770061	IQRVDKYSGRNKETVLANVEGLMDIIVVSPQRQTGTNACGVNNGGCTHLCFARASDFVCACPDEPDSQPCSLVPGLVPPAPRATGMSEKSPVLPNTPPTTLYSSTTRTRTSLEEVEGRCSERDARLGLCARSNDAVPAAP	LRP4	O75096	MAD	0	15.1	FALSE
HTP0393A	Plasma	SciLifeLab peptide array	LRP4_HPRR1770062	PGMGNLTYSNPSYRTSTQEVKIEAIPKPAMYNQLCYKKEGGPDHNYTKEKIKIVEGICLLSGDDAEWDDLKQLRSSRGGLLRDHVCMKTDTVSIQASSGSLDDTETEQLLQEEQSECSSVH	LRP4	O75096	MAD	-2	3.3	FALSE
HTP0393A	Plasma	SciLifeLab peptide array	MARS_HPRR430074	FVLQDTVEQLRCEHCARFLADRFVEGVCPFCGYEEARGDQCDKCGKLINAVELKKPQCKVCRSCPVVQSSQHLFLDLPKLEKRLEEWLGRTLPGSDWTPNAQFITRSWLRDGLKPRCITRDLKWGTPVPLEGFEDKVFYVWFD	MARS	P56192	MAD	2	4	FALSE
HTP0393A	Plasma	SciLifeLab peptide array	MBP_HPRR2850726	ASTNSETNRGESEKKRNLGELSRTTSEDNEVFGEADANQNNGTSSQDTAVTDSKRTADPKNAWQDAHPADPGSRPHLIRLFSRDAP	MBP	P02686	MAD	-1	33.3	FALSE
HTP0393A	Plasma	SciLifeLab peptide array	MBP_HPRR2850727	DENPVVHFFKNIVTPRTPPPSQGKGRGLSLSRFSWGAEGQRPGFGYGGRASDYKSAHKGFKGVDAQGTLSKIFKLGGRDSRSGSPM	MBP	P02686	MAD	-1	0	FALSE
HTP0393A	Plasma	SciLifeLab peptide array	MORC3_HPRR2280025	NNPDPQFRNCEVPEEPEDEDLVHPTYEKTYKKTNKEKFRIRQPEMIPRINAELLFRPTALSTPSFSSPKESVPRRHLSEGTNSYATRLLNNHQVPPQSEPESNSLKRR	MORC3	Q14149	MAD	0	4	FALSE
HTP0393A	Plasma	SciLifeLab peptide array	MORC3_HPRR2890077	GKKGTRIIIWNLRSYKNATEFDFEKDKYDIRIPEDLDEITGKKGYKKQERMDQIAPESDYSLRAYCSILYLKPRMQIILR	MORC3	Q14149	MAD	0	2	FALSE
HTP0393A	Plasma	SciLifeLab peptide array	MPO_HPRR280052	SRDHGLPGYNAWRRFCGLPQPETVGQLGTVLRNLKLARKLMEQYGTPNNIDIWMGGVSEPLKRKGRVGPLLACIIGTQFRKLRDGDRFWWENEGVFSMQQRQALAQISLPRIICDNTGITTVSKNNIFMSNSYPRDFVNC	MPO	P05164	MAD	0	1	FALSE
HTP0393A	Plasma	SciLifeLab peptide array	MPO_HPRR4160030	GAAPAVLGEVDTSLVLSSMEEAKQLVDKAYKERRESIKQRLR	MPO	P05164	MAD	11	5.2	TRUE
HTP0393A	Plasma	SciLifeLab peptide array	MUSK_HPRR2750111	YYGMAHEEVIYYVRDGNILSCPENCPVELYNLMRLCWSKLPADRPSFTSIHRILERMCERAEGTVSV	MUSK	O15146	MAD	1	2	FALSE
HTP0393A	Plasma	SciLifeLab peptide array	MUSK_HPRR2750113	PKAPVITTPLETVDALVEEVATFMCAVESYPQPEISWTRNKILIKLFDTRYSIRENGQLLTILSVEDSDDGIYCCTANNGVGGAVESCGALQVKMKPKITR	MUSK	O15146	MAD	-1	1	FALSE
HTP0393A	Plasma	SciLifeLab peptide array	MUSK_HPRR290005	RGEVCNAVLAKDALVFLNTSYADPEEAQELLVHTAWNELKVVSPVCRPAAEALLCNHIFQECSPGVVPTPIPICREYCLAVKELFCAKEWLVMEEKTHRGLYRSEMHLLSVPECSKLPSMHWDPTACARLPHLAFPPMTSSK	MUSK	O15146	MAD	-2	-1	FALSE
HTP0393A	Plasma	SciLifeLab peptide array	MUSK_HPRR4160302	RESAAVTLTTLPSELLLDRLHPNPMYQRMPLLLNPKLLSLEYPRNNIEYVRDIGEGAFGRVFQARAPGLLP	MUSK	O15146	MAD	0	2	FALSE
HTP0393A	Plasma	SciLifeLab peptide array	MUSK_HPRR4160303	RIHNVQKEDAGQYRCVAKNSLGTAYSKVVKLEVEVFARILRAPESHNVTFGSFVTLHCTATGIPVPTITWIENGNA	MUSK	O15146	MAD	1	3.1	FALSE
HTP0393A	Plasma	SciLifeLab peptide array	MYH10_HPRR3460173	RQLDDATEANEGLSREVSTLKNRLRRGGPISFSSSRSGRRQLHLEGASLELSDDDTESKTSDVNETQPPQ	MYH10	P35580	MAD	0	6.1	FALSE
HTP0393A	Plasma	SciLifeLab peptide array	MYH10_HPRR3890677	VQELHAKVSEGDRLRVELAEKASKLQNELDNVSTLLEEAEKKGIKFAKDA	MYH10	P35580	MAD	36	63.6	FALSE
HTP0393A	Plasma	SciLifeLab peptide array	MYH11_HPRR1720012	VTVLKKALDEETRSHEAQVQEMRQKHAQAVEELTEQLEQFKRAKANLDKNKQTLEKENADLAGELRVLGQAKQEVEHKKKKLEAQVQELQSKCSDGE	MYH11	P35749	MAD	-1	3	FALSE
HTP0393A	Plasma	SciLifeLab peptide array	MYH11_HPRR1720013	LQEETRQKLNVSTKLRQLEEERNSLQDQLDEEMEAKQNLERHISTLNIQLSDSKKKLQDFASTVEALEEGKKRFQKEIENLTQQYEEK	MYH11	P35749	MAD	4	12	FALSE
HTP0393A	Plasma	SciLifeLab peptide array	MYH13_HPRR4080014	DNKEMYVKGMIQTRENDKVIVKTLDDRMLTLNNDQVFPMN	MYH13	Q9UKX3	MAD	9	48.5	FALSE
HTP0393A	Plasma	SciLifeLab peptide array	MYH14_HPRR3830109	GAGEQLKADLLLEPCSHYRFLTNGPSSSPGQERELFQETLESLRVLGFSHEE	MYH14	Q7Z406	MAD	-1	4.1	FALSE
HTP0393A	Plasma	SciLifeLab peptide array	MYH14_HPRR4290008	FTTRTVRQVFRLEEGVASDEEAEEAQPGSGPSPEPEGSPP	MYH14	Q7Z406	MAD	-1	0	FALSE
HTP0393A	Plasma	SciLifeLab peptide array	MYH15_HPRR2960342	KMERERADLTQDLADLNERLEEVGGSSLAQLEITKKQETKFQKLHRDMEEATLHFETTSASLKKRH	MYH15	Q9Y2K3	MAD	2	5	FALSE
HTP0393A	Plasma	SciLifeLab peptide array	MYH15_HPRR2960343	LGEAAAFLRRSEAELLLLQATALDGKKKCWIPDGENAYIEAEVKGSEDDGTVIVETADGESLSIKEDKIQQMNPPEFE	MYH15	Q9Y2K3	MAD	-1	1.2	FALSE
HTP0393A	Plasma	SciLifeLab peptide array	MYH3_HPRR2500234	IEAQNQPFDAKTYCFVVDSKEEYAKGKIKSSQDGKVTVETEDNRTLVVKPEDVYAMNPPKFDRIEDMAML	MYH3	P11055	MAD	0	6.2	FALSE
HTP0393A	Plasma	SciLifeLab peptide array	MYH6*_HPRR141341	QVEEDKVNSLSKSKVKLEQQVDDLEGSLEQEKKVRMDLERAKRKLEGDLKLTQESIMDLENDKLQLEEKLKKKEFDINQQNSKIEDEQVLALQLQKKLKENQARIEELEEELEAERTARAKVEKLRSDLSRELEEISERLEEA	MYH6*	P13533;P12883;P13535;Q9Y623;P12882;Q9UKX2	MAD	4	10.3	FALSE
HTP0393A	Plasma	SciLifeLab peptide array	MYH6*_HPRR141342	ALRKKHADSVAELGEQIDNLQRVKQKLEKEKSEFKLELDDVTSNMEQIIKAKANLEKMCRTLEDQMNEHRSKAEETQRSVNDLTSQRAKLQTENGELSRQLDEKEALISQLTRGKLTYTQQLEDLKRQLEEEVKAKNALAHALQS	MYH6*	P13533;P12883	MAD	0	9.1	FALSE
HTP0393A	Plasma	SciLifeLab peptide array	MYH6*_HPRR4370083	LDKKQRNFDKILAEWKQKCEETHAELEA	MYH6*	P13533;P12883;Q9UKX3;P13535;Q9Y623;P12882;Q9UKX2;P11055	MAD	-2	2	FALSE
HTP0393A	Plasma	SciLifeLab peptide array	MYH7B_HPRR3300035	KVHTIPWDGKKRVWVPDEQDAYVEAEVKSEATGGRVTVETKDQKVLMVREAELQPMNPPRFDLLEDMAMM	MYH7B	A7E2Y1	MAD	2	18.3	FALSE
HTP0393A	Plasma	SciLifeLab peptide array	MYH7B_HPRR3300036	DMSGNKRGSRASCPHRGAECLLPWAALNLQGFQLLLLHPSATAMMDVSELGESARYLRQGYQEMTK	MYH7B	A7E2Y1	MAD	3	1	TRUE
HTP0393A	Plasma	SciLifeLab peptide array	MYH9_HPRR350143	REQEVNILKKTLEEEAKTHEAQIQEMRQKHSQAVEELAEQLEQTKRVKANLEKAKQTLENERGELANEVKVLLQGKGDSEHKRKKVEAQLQELQVKFNEGERVRTELADKVTKLQVELDNVTGLLSQSDSKSSKLTKDF	MYH9	P35579	MAD	-2	2.1	FALSE
HTP0393A	Plasma	SciLifeLab peptide array	NARS_HPRR3120288	RLEDLVCDVVDRILKSPAGSIVHELNPNFQPPKRPFKRMNYSDAIVWLKEHDVKKEDGTFYEFGEDIPEAPERLMTDTINEPILLCRFPVEIK	NARS	O43776	MAD	-1	3.1	FALSE
HTP0393A	Plasma	SciLifeLab peptide array	NARS_HPRR3120291	GALEGYRGQRVKVFGWVHRLRRQGKNLMFLVLRDGTGYLQCVLADELCQCYNGVLLSTESSVAVYGMLNLTPKGKQAPGGHELSCDFWELIG	NARS	O43776	MAD	0	3	FALSE
HTP0393A	Plasma	SciLifeLab peptide array	NARS2_HPRR370132	LAEFYMIEAEISFVDSLQDLMQVIEELFKATTMMVLSKCPEDVELCHKFIAPGQKDRLEHMLKNNFLIISYTEAVEILKQASQNFTFTPEWGADLRTEHEKYLVKHCGNIPVFVINYPLTLKPFYMRDNEDGPQHTVAAVDLLVPGVG	NARS2	Q96I59	MAD	-2	-1	FALSE
HTP0393A	Plasma	SciLifeLab peptide array	NCOA2_HPRR3760125	SPRMAHTQSPMMQQSQANPAYQAPSDINGWAQGNMGGNSMFSQQSPPHFGQQANTSMYSNNMNINVSMATNTGGMSSMNQMTGQISMTSVT	NCOA2	Q15596	MAD	1	1.1	FALSE
HTP0393A	Plasma	SciLifeLab peptide array	NCOA2_HPRR3760127	PKLERLDSKTDPASNTKLIAMKTEKEEMSFEPGDQPGSELDNLEEILDDLQNSQLPQLFPDTRPGAPAGSV	NCOA2	Q15596	MAD	65	38.4	TRUE
HTP0393A	Plasma	SciLifeLab peptide array	NKX6-1_HPRR3060095	PLGTHNPGGLKPPATGGLSSLGSPPQQLSAATPHGINDILSRPSM	NKX6-1	P78426	MAD	5	2	TRUE
HTP0393A	Plasma	SciLifeLab peptide array	NLRP5_HPRR3280206	LLPESFLIVTVRDVGTEKLKSEVVSPRYLLVRGISGEQRIHLLLERGIGEHQKTQGLRAIMNNRELLDQCQVPAVGSLICVALQLQDVVGESVAPFNQTLTGLHAAFVFHQLTPR	NLRP5	P59047	MAD	0	0	FALSE
HTP0393A	Plasma	SciLifeLab peptide array	NUP210_HPRR2110161	DLIHDIQIVSTTRELYLEDSPLELKIQALDSEGNTFSTLAGLVFEWTIVKDSEADRFSDSHNALRILTFLESTYIPPSYISEMEKAAKQGDTILVSGMKTGSSKLKARIQEAVYKNVRPAEVRLLILENILLNPAYDVYLMVGTSIHYK	NUP210	Q8TEM1	MAD	1	2.1	FALSE
HTP0393A	Plasma	SciLifeLab peptide array	NUP210_HPRR2110162	TFTVHFHDNSGDVFHAHSSVLNFATNRDDFVQIGKGPTNNTCVVRTVSVGLTLLRVWDAEHPGLSDFMPLPVLQAISPELSGAMVVGDVLCLATVLTSLEGLSGTWSSSANSILHIDPKTGVAV	NUP210	Q8TEM1	MAD	-1	-1	FALSE
HTP0393A	Plasma	SciLifeLab peptide array	NUP210_HPRR3890586	HLHPIQTSFQEATASKVIVAVGDRSSNLRGECTPTQREVIQALHPETLISCQSQFKPAVFDFPSQDVFTVEPQFDTALGQYFCSITMHRLTDKQRKHL	NUP210	Q8TEM1	MAD	-1	5.1	FALSE
HTP0393A	Plasma	SciLifeLab peptide array	NUP62_HPRR1430027	GGFTFGTAKTATTTPATGFSFSTSGTGGFNFGAPFQPATSTPSTGLFSLATQTPATQTTGFTFGTATLASGGTGFSLGIGASKLNLSNTAATPAMANPSGFGLGSSNLTNAISSTVTSSQGTAPTGFVFGPST	NUP62	P37198	MAD	-1	2	FALSE
HTP0393A	Plasma	SciLifeLab peptide array	OGDH_HPRR2440198	LRTCAAKLRPLTASQTVKTFSQNRPAAARTFQQIRCYSAPVAAEPFLSGTSSNYVEEMYCAWLENPKSV	OGDH	Q02218	MAD	0	0.1	FALSE
HTP0393A	Plasma	SciLifeLab peptide array	OGDH_HPRR2440199	FRNTNAGAPPGTAYQSPLPLSRGSLAAVAHAQSLVEAQPNVDKLVEDHLAVQSLIRAYQIRGHHVAQ	OGDH	Q02218	MAD	-1	1	FALSE
HTP0393A	Plasma	SciLifeLab peptide array	PAGE2B*_HPRR3340273	QGIAPSGEIENEGAPAVQGPDMEAFQQELALLKIEDEPGDGPDVREGIMPTFDLTKVLEAGDA	PAGE2B*	Q5JRK9;Q7Z2X7;Q96GU1	MAD	-1	6.3	FALSE
HTP0393A	Plasma	SciLifeLab peptide array	PAGE2B*_HPRR3340274	RSQSSERGNDQESSQPVGSVIVQEPTEEKRQEEEPPTDN	PAGE2B*	Q5JRK9;Q7Z2X7;Q96GU1	MAD	-1	14.1	FALSE
HTP0393A	Plasma	SciLifeLab peptide array	PAGE5_HPRR3920178	PWAGNRGWAGTREEVRDMSEHVTRSQS	PAGE5	Q96GU1	MAD	-1	12.3	FALSE
HTP0393A	Plasma	SciLifeLab peptide array	PDHA1*_HPRR3340143	NDATFEIKKCDLYLLEEGPPVTTVLTR	PDHA1*	P08559;P29803	MAD	0	2	FALSE
HTP0393A	Plasma	SciLifeLab peptide array	PDHA1*_HPRR3340144	ILAELTGRRGGCAKGKGGSMHMYTKNFYGGNGIVG	PDHA1*	P08559;P29803	MAD	0	1	FALSE
HTP0393A	Plasma	SciLifeLab peptide array	PDHA1*_HPRR3340146	YCRSGKGPILMELQTYRYHGHSMSDPGVS	PDHA1*	P08559;P29803	MAD	-1	0	FALSE
HTP0393A	Plasma	SciLifeLab peptide array	PDHX_HPRR3050163	PAARNILEKHSLDASQGTATGPRGIFTKEDALKLVQLKQTGKITESRPTPAPTATPTAPSPLQATAGPSYPRPVIPPVSTPGQPNAVGTFTEI	PDHX	O00330	MAD	19	0	TRUE
HTP0393A	Plasma	SciLifeLab peptide array	PDHX_HPRR3050164	DASDDGILAKIVVEEGSKNIRLGSLIGLIVEEGEDWKHVEIPKDVGPPPPVSKPSEPRPSPEPQISIPVKKEHIPGTLRFRLS	PDHX	O00330	MAD	17	22.4	FALSE
HTP0393A	Plasma	SciLifeLab peptide array	PDX1_HPRR3930003	DISPYEVPPLADDPAVAHLHHHLPAQLALPHPPAGPFPEGAEPGVLEEPNRVQLPFPWMKSTKA	PDX1	P52945	MAD	2	30.2	FALSE
HTP0393A	Plasma	SciLifeLab peptide array	PLP1_HPRR4180637	IYFNTWTTCQSIAFPSKTSASIGSLCADARMYGVLPWNAFPGK	PLP1	P60201	MAD	-1	0	FALSE
HTP0393A	Plasma	SciLifeLab peptide array	PPY_HPRR2500214	EPVYPGDNATPEQMAQYAADLRRYINMLTRPRYGKRHKEDTLAFSEWGSPHAAVPRELSPLDL	PPY	P01298	MAD	-1	2	FALSE
HTP0393A	Plasma	SciLifeLab peptide array	PROC_HPRR330193	DQCLVLPLEHPCASLCCGHGTCIDGIGSFSCDCRSGWEGRFCQREVSFLNCSLDNGGCTHYCLEEVGWRRCSCAPGYKLGDDLLQCHPAVKFPCGRPWKRMEKKRSHLKRDTEDQEDQVDPRLIDGKMTRRGDSPWQVVLLD	PROC	P04070	MAD	2	2	FALSE
HTP0393A	Plasma	SciLifeLab peptide array	PROC_HPRR330194	AHCMDESKKLLVRLGEYDLRRWEKWELDLDIKEVFVHPNYSKSTTDNDIALLHLAQPATLSQTIVPICLPDSGLAERELNQAGQETLVTGWGYHSSREKEAKRNRTFVLNFIKIPVVPHNECSEVMSNMVSENMLCAGI	PROC	P04070	MAD	-1	4	FALSE
HTP0393A	Plasma	SciLifeLab peptide array	PRPH_HPRR3070455	FSSTSYRRTFGPPPSLSPGAFSYSSSSRFSSSRLLGSASPSSSVRLGSFRSPRAGAGALLRLPSERLDFSMAEALNQEFLATRSNEKQEL	PRPH	P41219	MAD	13	0	TRUE
HTP0393A	Plasma	SciLifeLab peptide array	PRPH_HPRR3890753	EESRISVPVHSFASLNIKTTVPEVEPPQDSHSRKTVLIKTI	PRPH	P41219	MAD	-2	179.2	FALSE
HTP0393A	Plasma	SciLifeLab peptide array	PRTN3_HPRR400125	PTQQHFSVAQVFLNNYDAENKLNDILLIQLSSPANLSASVATVQLPQQDQPVPHGTQCLAMGWGRVGAHDPPAQVLQELNVTVVTFFCRPHNICTFVPRRKAGICFGDSGGPLICDGI	PRTN3	P24158	MAD	2	3	FALSE
HTP0393A	Plasma	SciLifeLab peptide array	PSMA3_HPRR4320279	TGYDLSASTFSPDGRVFQVEYAMKAVENSSTAIGIRCKDGVVFGVEKLVLSKLYEEGSNKRLFNVDRHVGMAVAGLLADAR	PSMA3	P25788	MAD	0	1	FALSE
HTP0393A	Plasma	SciLifeLab peptide array	PTGER3_HPRR1960004	MKETRGYGGDAPFCTRLNHSYTGMWAPERSAEARGNLTRPPGSGEDCGSVS	PTGER3	P43115	MAD	-1	2	FALSE
HTP0393A	Plasma	SciLifeLab peptide array	PTGER3_HPRR4160226	RKILLRKFCQIRYHTNNYASSSTSLPCQCSSTLMWSDHLER	PTGER3	P43115	MAD	0	2	FALSE
HTP0393A	Plasma	SciLifeLab peptide array	PTGS1_HPRR330080	MPDSFKVGSQEYSYEQFLFNTSMLVDYGVEALVDAFSRQIAGRIGGGRNMDHHILHVAVDVIRESREMRLQPFNEYRKRFGMKPYTSFQELVGEKEMAAELEELYGDIDALEFYPGLLLEKCHPNSIFGESMIEIGAPFSLKGLLGN	PTGS1	P23219	MAD	1	6	FALSE
HTP0393A	Plasma	SciLifeLab peptide array	PTPRN_HPRR1350005	VSSEPPKAARPPVTPVLLEKKSPLGQSQPTVAGQPSARPAAEEYGYIVTDQNVVGPALTFRIRHNEQNLSLADVTQQAGLVKSELEAQTGLQILQTGVGQREEAAAVLPQTAHSTSPM	PTPRN	Q16849	MAD	-1	1.1	FALSE
HTP0393A	Plasma	SciLifeLab peptide array	PTPRN_HPRR4160144	QVTSPVLQRLQGVLRQLMSQGLSWHDDLTQYVISQEMERIPRLRPPEPRPRDRSGLAPKRPGPAGELLLQDIPTGSAPAAQHRL	PTPRN	Q16849	MAD	-1	2	FALSE
HTP0393A	Plasma	SciLifeLab peptide array	PTPRN2_HPRR1350080	QDDDDRLYQEVHRLSATLGGLLQDHGSRLLPGALPFARPLDMERKKSEHPESSLSSEEETAGVENVKSQTYSKDLLGQQPHSEPGAAAFGELQNQMPGPSKEEQSLPAGAQ	PTPRN2	Q92932	MAD	26	3.1	TRUE
HTP0393A	Plasma	SciLifeLab peptide array	PTPRN2_HPRR1350081	RFSESILTYVAHTSALTYPPGSRTQLREDLLPRTLGQLQPDELSPKVDSGVDRHHLMAALSAYAAQRPPAPPGEGSLEPQYLLRAPSRMPRPLLAPAAPQKWPSPLGDSEDPSST	PTPRN2	Q92932	MAD	6	11.1	FALSE
HTP0393A	Plasma	SciLifeLab peptide array	RAB3D*_HPRR4320449	AVQDWATQIKTYSWDNAQVILVGNKCD	RAB3D*	O95716;P20336;P20337;Q96E17	MAD	1	1	FALSE
HTP0393A	Plasma	SciLifeLab peptide array	RAB3D_HPRR2260029	EASAKENINVKQVFERLVDVICEKMNESLEPSSSSGSNGKGPAVGDAPAPQPSSCSC	RAB3D	O95716	MAD	2	33	FALSE
HTP0393A	Plasma	SciLifeLab peptide array	RAPSN_HPRR3050586	TKVLEKSSDLMGRFRVLGCLVTAHSEMGRYKEMLKFAVVQIDTARELEDADFLLESYLNLARSNEKLCEFHKTISYCKTC	RAPSN	Q13702	MAD	0	2	FALSE
HTP0393A	Plasma	SciLifeLab peptide array	RAPSN_HPRR3050587	SLSMGNAFLGLSVFQKALESFEKALRYAHNNDDAMLECRVCCSLGSFYAQVKDYEKALFFPCKAAELVNNYGKGWSLKYRAMS	RAPSN	Q13702	MAD	-1	0	FALSE
HTP0393A	Plasma	SciLifeLab peptide array	RAPSN_HPRR3050588	MECCEESMKIALQHGDRPLQALCLLCFADIHRSRGDLETAFPRYDSAMSIMTEIGNRLGQVQALLGVAKCWVARKALDKALDAIE	RAPSN	Q13702	MAD	0	1	FALSE
HTP0393A	Plasma	SciLifeLab peptide array	RARS_HPRR620009	VVLGEDKKKFKTRSGETVRLMDLLGEGLKRSMDKLKEKERDKVLTAEELNAAQTSVAYGCIKYADLSHNRLNDYIFSFDKMLDDRGNTAAYLLYAFTRIRSIARLANIDEEMLQKAARETKILLDHEKEWKLGRCILRFPEI	RARS	P54136	MAD	11	2	TRUE
HTP0393A	Plasma	SciLifeLab peptide array	REG1B*_HPRR3320001	TDDFNVWIGLHDPKKNRRWHWSSGSLVSYKSWG	REG1B*	P48304;P05451	MAD	0	3.1	FALSE
HTP0393A	Plasma	SciLifeLab peptide array	REG1B*_HPRR3320002	PEGTNAYRSYCYYFNEDRETWVDADLYCQNMNSGNLVSV	REG1B*	P48304;P05451	MAD	1	13.8	FALSE
HTP0393A	Plasma	SciLifeLab peptide array	RHD*_HPRR3980079	LNLKIWKAPHVAKYFDDQVFWKFPHLAVGF	RHD*	Q02161;P18577	MAD	-1	2	FALSE
HTP0393A	Plasma	SciLifeLab peptide array	RHD*_HPRR4080111	AILLDGFLSQFPSGKVVITLFSIRL	RHD*	Q02161;P18577	MAD	2	2	FALSE
HTP0393A	Plasma	SciLifeLab peptide array	RHD_HPRR2870121	VGFSKSIQEKQGLFKNKTTSSHCCLHLYVRNAHDSKVSNVRAGTGVRENGVESFLCHSLRRISPFIMHC	RHD	Q02161	MAD	0	1.1	FALSE
HTP0393A	Plasma	SciLifeLab peptide array	RPL6_HPRR3720353	VPRKLLSHGKKPFSQHVRKLRASITPGTILIILTGRHRGKRVVFLKQLASGLLL	RPL6	Q02878	MAD	-2	-1	FALSE
HTP0393A	Plasma	SciLifeLab peptide array	RPL6_HPRR580003	LRASITPGTILIILTGRHRGKRVVFLKQLASGLLLVTGPLVLNRVPLRRTHQKFVIATSTKIDISNVKIPKHLTDAYFKKKKLRKPRHQEGEIFDTEKEKYEITEQRKIDQKAVDSQILPKIKAIPQLQGYLRSVFALTNGIYPH	RPL6	Q02878	MAD	16	7	TRUE
HTP0393A	Plasma	SciLifeLab peptide array	RPLP0_HPRR580058	VVLMGKNTMMRKAIRGHLENNPALEKLLPHIRGNVGFVFTKEDLTEIRDMLLANKVPAAARAGAIAPCEVTVPAQNTGLGPEKTSFFQALGIT	RPLP0	P05388	MAD	1	2.1	FALSE
HTP0393A	Plasma	SciLifeLab peptide array	RPLP1_HPRR580030	MASVSELACIYSALILHDDEVTVTEDKINALIKAAGVNVEPFWPGLFAKALANVNIGSLICNVGAGGPAPAAGAAPAGGPAPSTAAAPAEEKKVEAKKEESEESDDDMG	RPLP1	P05386	MAD	-1	1	FALSE
HTP0393A	Plasma	SciLifeLab peptide array	RPLP2_HPRR3830386	MRYVASYLLAALGGNSSPSAKDIKKILDSVGIEADDDRLNKVIS	RPLP2	P05387	MAD	-1	0	FALSE
HTP0393A	Plasma	SciLifeLab peptide array	RPLP2_HPRR4290615	SELNGKNIEDVIAQGIGKLASVPAGGAVAVSAAPGSAAP	RPLP2	P05387	MAD	1	5.3	FALSE
HTP0393A	Plasma	SciLifeLab peptide array	RYR1_HPRR3420763	REFLHNNLHLQGKVEGSPSLRWQMALYRGVPGREEDADDPEKIVRRVQEVSAVLYYLDQTEHPYKSKK	RYR1	P21817	MAD	-1	0	FALSE
HTP0393A	Plasma	SciLifeLab peptide array	SAE1_HPRR3280030	NSIKFFTGDVFGYHGYTFANLGEHEFVEEKTKVAKVSQGVEDGPDTKRAKLDSSETTMVKKKVVFCPVKEALE	SAE1	Q9UBE0	MAD	0	3	FALSE
HTP0393A	Plasma	SciLifeLab peptide array	SAE1_HPRR3280031	KGLTMLDHEQVTPEDPGAQFLIRTGSVGRNRAEASLERAQNLNPMVDVKVDTEDIEKKPESFFTQFDAVCLTCCSRD	SAE1	Q9UBE0	MAD	0	23.4	FALSE
HTP0393A	Plasma	SciLifeLab peptide array	SARS_HPRR1390005	NVLSFDDLTADALANLKVSQIKKVRLLIDEAILKCDAERIKLEAERFENLREIGNLLHPSVPISNDEDVDNKVERIWGDCTVRKKYSHVDLVVMVDGFEGEKGAVVAGSRGYFLKGVLVFLEQALIQYAL	SARS	P49591	MAD	2	3	FALSE
HTP0393A	Plasma	SciLifeLab peptide array	SARS_HPRR4160317	GSRGYIPIYTPFFMRKEVMQEVAQLSQFDEELYKVIGKGSEKSDDNSYDEKYLIATSEQPIAALHRDEWLRPEDLPIKYAGLSTCFRQ	SARS	P49591	MAD	1	5.1	FALSE
HTP0393A	Plasma	SciLifeLab peptide array	SIAH2_HPRR1450566	QPQHTPSPQHHELTSLFECPVCFDYVLPPILQCQAGHLVCNQCRQKLSCCP	SIAH2	O43255	MAD	0	2	FALSE
HTP0393A	Plasma	SciLifeLab peptide array	SIAH2_HPRR4040718	TGPSANKPCSKQPPPQPQHTPSPA	SIAH2	O43255	MAD	103	158.8	FALSE
HTP0393A	Plasma	SciLifeLab peptide array	SLC14A1_HPRR4030315	MNGRSLIGGAGDARHGPVWKDPFGTKAGDAARRGIARLSLALADGSQEQE	SLC14A1	Q13336	MAD	0	1	FALSE
HTP0393A	Plasma	SciLifeLab peptide array	SLC14A1_HPRR4030316	GHYNPFFPAKLVIPITTAPNISWSDLSALELLKSIPVGVGQI	SLC14A1	Q13336	MAD	-2	1	FALSE
HTP0393A	Plasma	SciLifeLab peptide array	SLC26A4_HPRR2440187	FGLLTVVLRVQFPSWNGLGSIPSTDIYKSTKNYKNIEEPQGVKILRFSSPIFYGNVDGFKKCIKSTVGFDAIRVYNKRLKALRK	SLC26A4	O43511	MAD	-2	-1	FALSE
HTP0393A	Plasma	SciLifeLab peptide array	SLC26A4_HPRR2440190	IEKLEQCGFFDDNIRKDTFFLTVHDAILYLQNQVKSQEGQGSILETITLIQDCKDTLELIETELTEEELDVQDE	SLC26A4	O43511	MAD	-2	-1	FALSE
HTP0393A	Plasma	SciLifeLab peptide array	SLC26A4_HPRR3870179	QLPEYSCSYMVSRPVYSELAFQQQHERRLQERKTLRESLAKCCSCSRKRAFGVLKTLVPILE	SLC26A4	O43511	MAD	0	2	FALSE
HTP0393A	Plasma	SciLifeLab peptide array	SLC30A8_HPRR2180114	MEFLERTYLVNDKAAKMYAFTLESVELQQKPVNKDQCPRERPEELESGGMYHCHSGSKPTEKGANEYAYAKWK	SLC30A8	Q8IWU4	MAD	1	19.2	FALSE
HTP0393A	Plasma	SciLifeLab peptide array	SLC30A8_HPRR3970264	LHQRCLGHNHKEVQANASVRAA	SLC30A8	Q8IWU4	MAD	-1	1	FALSE
HTP0393A	Plasma	SciLifeLab peptide array	SLC30A8_HPRR3970265	LSAHVATAASRDSQVVRREIAKALSKSFTMHSLTIQMESPVDQDPDCLFCEDPCD	SLC30A8	Q8IWU4	MAD	2	6	FALSE
HTP0393A	Plasma	SciLifeLab peptide array	SNRPB*_HPRR400172	TFKAFDKHMNLILCDCDEFRKIKPKNAKQPEREEKRVLGLVLLRGENLVSMTVEGPPPKDTGIARVPLAGAAGGPGVGRAAGRGVPAGVPIPQ	SNRPB*	P14678;P63162	MAD	0	2	FALSE
HTP0393A	Plasma	SciLifeLab peptide array	SNRPB*_HPRR4320676	QAPAGLAGPVRGVGGPSQQVMTPQGRGT	SNRPB*	P14678;P63162	MAD	-1	1.1	FALSE
HTP0393A	Plasma	SciLifeLab peptide array	SNRPD1_HPRR3120151	SMNTHLKAVKMTLKNREPVQLETLSIRGNNIRYFILPDSLPLDTLLVDVEPKVKSKKREAVAGRGR	SNRPD1	P62314	MAD	-1	1.1	FALSE
HTP0393A	Plasma	SciLifeLab peptide array	SNRPD1_HPRR4000134	MKLVRFLMKLSHETVTIELKNGTQVHGTITGVDVS	SNRPD1	P62314	MAD	6	10.1	FALSE
HTP0393A	Plasma	SciLifeLab peptide array	SNRPD2_HPRR3250190	GKGKKKSKPVNKDRYISKMFLRGDSVIVVLRNPLIAGK	SNRPD2	P62316	MAD	-1	0	FALSE
HTP0393A	Plasma	SciLifeLab peptide array	SNRPD2_HPRR3250191	REEEEFNTGPLSVLTQSVKNNTQVLINCRNNKKLLGRVKAFDRHCNMVLENVKEMWTE	SNRPD2	P62316	MAD	0	1	FALSE
HTP0393A	Plasma	SciLifeLab peptide array	SNRPD3_HPRR220243	KVLHEAEGHIVTCETNTGEVYRGKLIEAEDNMNCQMSNITVTYRDGRVAQLEQVYIRGSKIRFLILPDMLKNAPMLKSMKNKNQGSGAGRGKAAILKAQVAARGRGRGMGRGNI	SNRPD3	P62318	MAD	0	1.1	FALSE
HTP0393A	Plasma	SciLifeLab peptide array	SNRPF_HPRR1720018	LNPKPFLNGLTGKPVMVKLKWGMEYKGYLVSVDGYMNMQLANTEEYIDGALSGHLGEVLIRCNNVLYIRGVEEEEEDG	SNRPF	P62306	MAD	12	9.1	TRUE
HTP0393A	Plasma	SciLifeLab peptide array	SNRPG_HPRR3400115	MSKAHPPELKKFMDKKLSLKLNGGRHVQGILRGFDPFMNLVIDECVEMATSGQQNNIGMVVIRGNSIIMLEALE	SNRPG	P62308	MAD	0	0.1	FALSE
HTP0393A	Plasma	SciLifeLab peptide array	SOX10_HPRR3830104	YSAAGYGLGSALAVASGHSAWISKPPGVALPTVSPPGVDAKAQVKTETA	SOX10	P56693	MAD	-1	13	FALSE
HTP0393A	Plasma	SciLifeLab peptide array	SOX13_HPRR3410162	QDARQLLHSHSGALDGSPNTPFRKDLISLDSSPAKERLEDGCVHPLEEAMLSCDMDGSRHFPESRNSSHI	SOX13	Q9UN79	MAD	18	3	TRUE
HTP0393A	Plasma	SciLifeLab peptide array	SOX13_HPRR3410163	DVLYPRAAGMPLAQPLVEHYVPRSLDPNMPVIVNTCSLREEGEGTDDRHSVADGEMYRYSEDEDSEGEEKSDGELVVLT	SOX13	Q9UN79	MAD	0	3	FALSE
HTP0393A	Plasma	SciLifeLab peptide array	SOX9_HPRR360171	SQRTHIKTEQLSPSHYSEQQQHSPQQIAYSPFNLPHYSPSYPPITRSQYDYTDHQNSSSYYSHAAGQGTGLYSTFTYMNPAQRPMYTPIADTSGVPSIPQTHSPQHWEQPVYTQLTR	SOX9	P48436	MAD	2	1.1	TRUE
HTP0393A	Plasma	SciLifeLab peptide array	SOX9_HPRR4180522	PFMKMTDEQEKGLSGAPSPTMSEDSAGSPCPSGSGSDTENTRPQENTFPKGEPDLKKESEEDKF	SOX9	P48436	MAD	1	8.2	FALSE
HTP0393A	Plasma	SciLifeLab peptide array	SP100_HPRR2240001	YKGFENVIHDKLPLQESEEEEREERSGLQLSLEQGTGENSFRSLTWPPSGSPSHAGTTPPENGLSEHPCETEQINAKRKDTTSDKDDSLGSQQTNEQCAQKAEPTESCEQIAVQVNNGDAGREMPCPL	SP100	P23497	MAD	-1	2.5	FALSE
HTP0393A	Plasma	SciLifeLab peptide array	SP100_HPRR2240002	QARTHHNQASDIIVISSEDSEGSTDVDEPLEVFISAPRSEPVINNDNPLESNDEKEGQEATCSRPQIVPEPMDFRKLSTFRESFKKRVIGQDHDFSESSE	SP100	P23497	MAD	-1	1	FALSE
HTP0393A	Plasma	SciLifeLab peptide array	SP140_HPRR1450089	SELEKTFGWSHLEALFSRINLMAYPDLNEIYRSFQNVCYEHSPLQMNNVNDLEDRPRLLPYGKQENSNACHEMDDIAVPQEALSSSPRCEPGFSSESCEQLALPKAGGGDAEDAPSLLPGGGVSCKLAIQIDEGESEEMPKLLP	SP140	Q13342	MAD	-2	4.2	FALSE
HTP0393A	Plasma	SciLifeLab peptide array	SP140_HPRR4160718	LSLLPGEGEEGSDDCSEMCDGEERQEASSSLARRGSVSSELENHPMNEEGESEELASSLLYDNVPGAEQSA	SP140	Q13342	MAD	-1	2	FALSE
HTP0393A	Plasma	SciLifeLab peptide array	SRP14_HPRR2870077	GTVEGFEPADNKCLLRATDGKKKISTVVSSKEVNKFQMAYSNLLRANMDGLKKRDKKNKTKKTKAAAAA	SRP14	P37108	MAD	0	0	FALSE
HTP0393A	Plasma	SciLifeLab peptide array	SRP14_HPRR3930096	MVLLESEQFLTELTRLFQKCRTSGSVYITLKKYDGRTKPIPKK	SRP14	P37108	MAD	0	1	FALSE
HTP0393A	Plasma	SciLifeLab peptide array	SRP19_HPRR2870087	DVQYRGRVRVQLKQEDGSLCLVQFPSRKSVMLYAAEMIPKLKTRTQKTGGADQSLQQGEGSK	SRP19	P09132;Q15695	MAD	0	3	FALSE
HTP0393A	Plasma	SciLifeLab peptide array	SRP19_HPRR2870088	DQDRFICIYPAYLNNKKTIAEGRRIPISKAVENPTATEIQDVCSAVGLNVFLEKNKMYSREWNR	SRP19	P09132;Q15695	MAD	0	2	FALSE
HTP0393A	Plasma	SciLifeLab peptide array	SRP54_HPRR3720460	VIIASEGVEKFKNENFEIIIVDTSGRHKQEDSLFEEMLQVANAIQPDNIVYVMDASIGQACEAQAKAFKDKVDVASVIVT	SRP54	P61011	MAD	1	4.1	FALSE
HTP0393A	Plasma	SciLifeLab peptide array	SRP54_HPRR3720461	SALRSLSNATIINEEVLNAMLKEVCTALLEADVNIKLVKQLRENVKSAIDLEEMASGLNKRKMIQHAVFKELVKLVDPGVKAWTPTKGKQNV	SRP54	P61011	MAD	0	2	FALSE
HTP0393A	Plasma	SciLifeLab peptide array	SRP68_HPRR2500803	AESEETKERLFESMLSECRDAIQVVREELKPDQKQRDYILEGEPGKVSNLQYLHSYLTYIKLSTAIKRNENMAKGLQRALLQQQPEDDSKRSPRPQDLIRLYDIILQNLVELL	SRP68	Q9UHB9	MAD	-2	-2	FALSE
HTP0393A	Plasma	SciLifeLab peptide array	SRP68_HPRR2500805	GEENKENERPSAGSKANKEFGDSLSLEILQIIKESQQQHGLRHGDFQRYRGYCSRRQRRLRKTLNFKMGNRHKFTGKKVTEELLTDNRYLLLVLMDAERAWSYAMQLKQEANTEPRKRFHLLSRLRKAVKHAEELERLCE	SRP68	Q9UHB9	MAD	-1	0	FALSE
HTP0393A	Plasma	SciLifeLab peptide array	SRP68_HPRR2500807	DAKTKLEAQAYTAYLSGMLRFEHQEWKAAIEAFNKCKTIYEKLASAFTEEQAVLYNQRVEEISPNIRYCAYNIGDQSAINELMQMRLRSGGTEGLLAEKLEALITQTRAKQAATMSEVEWRGRTVPVKIDKVRIFLLGLADNEAAIV	SRP68	Q9UHB9	MAD	0	1.1	FALSE
HTP0393A	Plasma	SciLifeLab peptide array	SRP72_HPRR2870116	QHTKAIELLQEFSDQHPENAAEIKLTMAQLKISQGNISKACLILRSIEELKHKPGMVSALVTMYSHEEDIDSAIEVFTQAIQWYQNHQPKSPA	SRP72	O76094	MAD	-1	0	FALSE
HTP0393A	Plasma	SciLifeLab peptide array	SRP72_HPRR2870118	ENALKTIESANQQTDKLKELYGQVLYRLERYDECLAVYRDLVRNSQDDYDEERKTNLSAVVAAQSNWEKVVPENLGLQEGTHELCYNTACA	SRP72	O76094	MAD	-1	2.1	FALSE
HTP0393A	Plasma	SciLifeLab peptide array	SRP72_HPRR2870119	ANFKLKYGRKKEAISDLQQLWKQNPKDIHTLAQLISAYSLVDPEKAKALSKHLPSSDSMSLKVDVEALENSAGATYIRKKGGKVTGDSQPKEQG	SRP72	O76094	MAD	10	4	TRUE
HTP0393A	Plasma	SciLifeLab peptide array	SSB_HPRR2010045	AKICHQIEYYFGDFNLPRDKFLKEQIKLDEGWVPLEIMIKFNRLNRLTTDFNVIVEALSKSKAELMEISEDKTKIRRSPSKPLPEVTDEYKNDVKNRSVYIKGFPTDATLDD	SSB	P05455	MAD	0	19.5	FALSE
HTP0393A	Plasma	SciLifeLab peptide array	SSB_HPRR2010046	VVFDSIESAKKFVETPGQKYKETDLLILFKDDYFAKKNEERKQNKVEAKLRAKQEQEAKQKL	SSB	P05455	MAD	9	4.1	TRUE
HTP0393A	Plasma	SciLifeLab peptide array	SSSCA1_HPRR3050793	NGAEVDDFSWEPPTEAETKVLQARRERQDRISRLMGDYLLRGYRMLGETCADCGTILLQDKQRKIYCVACQELDSDVDKDNPALNAQAALSQAR	SSSCA1	O60232	MAD	-1	0	FALSE
HTP0393A	Plasma	SciLifeLab peptide array	SUMO1_HPRR2920297	QDSSEIHFKVKMTTHLKKLKESYCQRQGVPMNSLRFLFEGQRIADNHTPKELGMEEEDVIEVYQEQT	SUMO1	P63165	MAD	1	1	FALSE
HTP0393A	Plasma	SciLifeLab peptide array	SUMO1_HPRR3890167	SDQEAKPSTEDLGDKKEGEYIKLKV	SUMO1	P63165	MAD	0	3	FALSE
HTP0393A	Plasma	SciLifeLab peptide array	SUMO4*_HPRR3230036	TDKPAQLEMEDEDTIDVFQQPTGGV	SUMO4*	Q6EEV6;P55854;P61956	MAD	-1	2.1	FALSE
HTP0393A	Plasma	SciLifeLab peptide array	SUMO4*_HPRR3230037	HINLKVAGQDGSVVQFKIKRHTPLSKLMKAYC	SUMO4*	Q6EEV6;P55854;P61956	MAD	-1	0	FALSE
HTP0393A	Plasma	SciLifeLab peptide array	TALDO1_HPRR3050870	FVGRILDWHVANTDKKSYEPLEDPGVKSVTKIYNYYKKFSYKTIVMGASFRNTGEIKALAGCDFLTISPKLLGEL	TALDO1	P37837	MAD	0	1	FALSE
HTP0393A	Plasma	SciLifeLab peptide array	TALDO1_HPRR3050873	MSSSPVKRQRMESALDQLKQFTTVVADTGDFHAIDEYKPQDATTNPSLILAAAQMPAYQELVEEAIAYGRKLGGS	TALDO1	P37837	MAD	16	8.2	TRUE
HTP0393A	Plasma	SciLifeLab peptide array	TARS_HPRR3010092	MFEEKASSPSGKMGGEEKPIGAGEEKQKEGGKKKNKEGSGDGGRAELNPWPEYIYTRLEMYNIL	TARS	P26639	MAD	-1	0	FALSE
HTP0393A	Plasma	SciLifeLab peptide array	TARS_HPRR3890005	RDNKVHGERTISETIERLQQLKEFRSKQAEEEF	TARS	P26639	MAD	49	3.2	TRUE
HTP0393A	Plasma	SciLifeLab peptide array	TDRD6_HPRR2630195	VLHVDYGRKELVSCSSLRYLLPEYFRMPVVTYPCALYGLWDGGRGWSRSQVGDLKALILGKAVNAKIEFYCSFEHVYYVSLYGEDGINLNRVFGVQSC	TDRD6	O60522	MAD	1	2	FALSE
HTP0393A	Plasma	SciLifeLab peptide array	TDRD6_HPRR4290688	INSSYKELKLLQSLTKTNLVTQYQDSVGNKNSQVFPLTTEKKEEISAETPLKTARVEATLSERKIGDSCDKDLPLKFCEFPQKTI	TDRD6	O60522	MAD	7	25.1	FALSE
HTP0393A	Plasma	SciLifeLab peptide array	TG_HPRR350042	KMCSADYADLLQTFQVFILDELTARGFCQIQVKTFGTLVSIPVCNNSSVQVGCLTRERLGVNVTWKSRLEDIPVASLPDLHDIERALVGKDLLGRFTDLIQSGSFQLHLDSKTFPAETIRFLQGDHFGTSPRTWFGCSEGFYQVLTSEASQDGLGCVKCPEGS	TG	P01266	MAD	-1	-1	FALSE
HTP0393A	Plasma	SciLifeLab peptide array	TGM2_HPRR2430028	MAEELVLERCDLELETNGRDHHTADLCREKLVVRRGQPFWLTLHFEGRNYEASVDSLTFSVVTGPAPSQEAGTK	TGM2	P21980	MAD	1	2	FALSE
HTP0393A	Plasma	SciLifeLab peptide array	TGM2_HPRR2430030	VEPVINSYLLAERDLYLENPEIKIRILGEPKQKRKLVAEVSLQNPLPVALEGCTFTVEGAGLTEEQKTVEIPDPVEAGEEVKVRMDLLP	TGM2	P21980	MAD	0	0	FALSE
HTP0393A	Plasma	SciLifeLab peptide array	TH_HPRR2010098	EFGLCKQNGEVKAYGAGLLSSYGELLHCLSEEPEIRAFDPEAAAVQPYQDQTYQSVYFVSESFSDAKDKLRSYASRIQRPFSVKFDPYTLAIDVLDSPQAVRRSLEGVQDEL	TH	P07101	MAD	-1	0	FALSE
HTP0393A	Plasma	SciLifeLab peptide array	TH_HPRR3790012	SESFSDAKDKLRSYASRIQRPFSVKFDPYTLAIDVLDSPQAVRRSLEGVQDELDTLAHALSAIG	TH	P07101	MAD	-1	2	FALSE
HTP0393A	Plasma	SciLifeLab peptide array	TKT_HPRR2460038	HYYEGGIGEAVSSAVVGEPGITVTHLAVNRVPRSGKPAELLKMFGIDRDAIAQAVRGLITKA	TKT	P29401	MAD	1	2.1	FALSE
HTP0393A	Plasma	SciLifeLab peptide array	TKT_HPRR2460039	IAKTFKGRGITGVEDKESWHGKPLPKNMAEQIIQEIYSQIQSKKKILATPPQEDAPSVDIANIRMPSLPSYKVGDKIATRKAYGQ	TKT	P29401	MAD	-2	2	FALSE
HTP0393A	Plasma	SciLifeLab peptide array	TMEM59_HPRR1950574	HLLFPLTLVRSFWSDMMDSAQSFITSSWTFYLQADDGKIVIFQSKPEIQYAPHLEQEPTNLRESSLSKMSSDLQMRNSQAHRNFLEDGESDGFLRCLSLNSGW	TMEM59	Q9BXS4	MAD	0	1	FALSE
HTP0393A	Plasma	SciLifeLab peptide array	TNFRSF13C_HPRR221279	SWRRRQRRLRGASSAEAPDGDKDAPEPLDKVIILSPGISDATAPAWPPPGEDPGTTPPGHSVPVPATELGSTELVTTKTAGPEQQ	TNFRSF13C	Q96RJ3	MAD	-1	2	FALSE
HTP0393A	Plasma	SciLifeLab peptide array	TNNC1_HPRR3460135	NADGYIDLDELKIMLQATGETITEDDIEELM	TNNC1	P63316	MAD	14	1	TRUE
HTP0393A	Plasma	SciLifeLab peptide array	TNNC1_HPRR3460136	MDDIYKAAVEQLTEEQKNEFKAAFDIFVLGAEDGCISTKELGKVM	TNNC1	P63316	MAD	-1	2.1	FALSE
HTP0393A	Plasma	SciLifeLab peptide array	TNNC2_HPRR3300245	NADGYIDPEELAEIFRASGEHVTDEEIESLM	TNNC2	P02585	MAD	50	51.1	FALSE
HTP0393A	Plasma	SciLifeLab peptide array	TNNC2_HPRR3870324	ARSYLSEEMIAEFKAAFDMFDADGGGDISVKE	TNNC2	P02585	MAD	-1	2	FALSE
HTP0393A	Plasma	SciLifeLab peptide array	TNNI2_HPRR3960019	ELEKEESRREAEKQNYLAEHCPPLHIPGSMSEVQELCKQLHAKIDAAEEEKYDMEVRVQKTSK	TNNI2	P48788	MAD	-1	6.6	FALSE
HTP0393A	Plasma	SciLifeLab peptide array	TNNI3_HPRR3140624	PIRRRSSNYRAYATEPHAKKKSKISASRKLQLKTLLLQIAKQELEREAEERRGEKGRALSTRCQPLELAGLGFAELQ	TNNI3	P19429	MAD	-1	0	FALSE
HTP0393A	Plasma	SciLifeLab peptide array	TNNT1_HPRR3920058	EEEEAPEEPEPVAEPEEERPKPSRPVVPPLIPPKIPEGE	TNNT1	P13805	MAD	209	25.7	TRUE
HTP0393A	Plasma	SciLifeLab peptide array	TNNT2_HPRR2190018	IEEVVEEYEEEEQEEAAVEEEDWREDEDEQEEAAEEDAEAEAETEETRAEEDEEEEEAKEAEDGPMEESKPKPRSFMPNLV	TNNT2	P45379	MAD	56	98.7	FALSE
HTP0393A	Plasma	SciLifeLab peptide array	TNNT2_HPRR2190019	EEEENRRKAEDEARKKKALSNMMHFGGYIQKQAQTERKSGKRQTEREKKKKILAERRKVLAIDHLNEDQLREKAKELWQSIYNLEAEKFDLQEKFKQQKYEINVLRNRINDNQKVSK	TNNT2	P45379	MAD	0	2.1	FALSE
HTP0393A	Plasma	SciLifeLab peptide array	TNNT3_HPRR3050240	RKPLNIDHLGEDKLRDKAKELWETLHQLEIDKFEFGEKLKRQKYDITTLRSRIDQAQKHSKKAGTPAKGKVG	TNNT3	P45378	MAD	-1	0.2	FALSE
HTP0393A	Plasma	SciLifeLab peptide array	TNNT3_HPRR3890527	EEEAQEEAAEVHEEVHEPEEVQEDTAEEDAEEEKPRPKLTAPK	TNNT3	P45378	MAD	0	5	FALSE
HTP0393A	Plasma	SciLifeLab peptide array	TOP1_HPRR2420091	GDHLHNDSQIEADFRLNDSHKHKDKHKDREHRHKEHKKEKDREKSKHSNSEHKDSEKKHKEKEKTKHKDGSSEKH	TOP1	P11387	MAD	1	0	TRUE
HTP0393A	Plasma	SciLifeLab peptide array	TOP1_HPRR2420092	KVRASGDAKIKKEKENGFSSPPQIKDEPEDDGYFVPPKEDIKPLKRPRDEDDADYKPKK	TOP1	P11387	MAD	1	23.1	FALSE
HTP0393A	Plasma	SciLifeLab peptide array	TOP1_HPRR2420093	KKEKKRKLEEEEDGKLKKPKNKDKDKKVPEPDNKKKKPKKEEEQKWKWWEEERYPEGIKWKFLEHKGPVFAPPYEPLPENVKFYYD	TOP1	P11387	MAD	-1	2	FALSE
HTP0393A	Plasma	SciLifeLab peptide array	TOP2A_HPRR1370117	RGQRVIPRITIEMKAEAEKKNKKKIKNENTEGSPQEDGVELEGLKQRLEKKQKREPGTKTKKQTTLAFKPIKKGKKRNPWSDSESDRSSDESNFDVP	TOP2A	P11388	MAD	3	3.1	FALSE
HTP0393A	Plasma	SciLifeLab peptide array	TOP2A_HPRR1370118	DASPPKTKTSPKLSNKELKPQKSVVSDLEADDVKGSVPLSSSPPATHFPDETEITNPVPKKNVTVKKTAAKSQSSTSTTGAKKRAAPKGTKRDPALNSGVSQKPDPAKTKNRRKRKPSTSDDSDSNFEKIVSKAVTSKKSKG	TOP2A	P11388	MAD	54	22.2	TRUE
HTP0393A	Plasma	SciLifeLab peptide array	TPH1_HPRR1220002	ISELKHALSGHAKVKPFDPKITCKQECLITTFQDVYFVSESFEDAKEKMREFTKTIKRPFGVKYNPYTRSIQILKDTKSITSAMNELQHDLDVVSDALAKVSRKPSI	TPH1	P17752	MAD	0	1	FALSE
HTP0393A	Plasma	SciLifeLab peptide array	TPM4*_HPRR3340170	EMQLKEAKHIAEEADRKYEEVARKLVILE	TPM4*	P67936;P07951;P09493;P06753	MAD	0	16	FALSE
HTP0393A	Plasma	SciLifeLab peptide array	TPM4*_HPRR3340171	KAADESERGMKVIENRAMKDEEKMEIQE	TPM4*	P67936;P07951;P09493;P06753	MAD	-1	0	FALSE
HTP0393A	Plasma	SciLifeLab peptide array	TPM4*_HPRR3340172	LNRRIQLVEEELDRAQERLATALQKLEE	TPM4*	P67936;P07951;P09493;P06753	MAD	1	11.1	FALSE
HTP0393A	Plasma	SciLifeLab peptide array	TPO_HPRR1950563	RELEKHSLSRVICDNTGLTRVPMDAFQVGKFPEDFESCDSITGMNLEAWRETFPQDDKCGFPESVENGDFVHCEESGRRVLVYSCRHGYELQGREQLTCTQEGWDFQPPLCKDVNECADGA	TPO	P07202	MAD	7	22.9	FALSE
HTP0393A	Plasma	SciLifeLab peptide array	TPO_HPRR4180385	STVICRWTRTGTKSTLPISETGGGTPELRCGKHQAVGTSPQRAAAQDSEQESAGMEGRDTHRLPRA	TPO	P07202	MAD	0	59.6	FALSE
HTP0393A	Plasma	SciLifeLab peptide array	TRIM21_HPRR1060031	LEKDEREQLRILGEKEAKLAQQSQALQELISELDRRCHSS	TRIM21	P19474	MAD	104	15.4	TRUE
HTP0393A	Plasma	SciLifeLab peptide array	TRIM24_HPRR3500066	NCAEFNEPDSEVANAGIKLENYFEELLKNLYPEKRFPKPEFRNESEDNKFSDDSDDDFVQPRKKRLKSIEERQLLK	TRIM24	O15164	MAD	2	21.2	FALSE
HTP0393A	Plasma	SciLifeLab peptide array	TRIM24_HPRR3500067	SSPVGGSYNLPSLPDIDCSSTIMLDNIVRKDTNIDHGQPRPPSNRTVQSPNSSVPSPGLAGPVTMTSVHPPIRSPSA	TRIM24	O15164	MAD	-1	0	FALSE
HTP0393A	Plasma	SciLifeLab peptide array	TRIM28_HPRR4180661	TDSTFSLDQPGGTLDLTLIRARLQEKLSPPYSSPQEFAQDVGRMFKQFNKLTEDKADVQSIIGLQRFFETRMNEAFGDTKFSAVLV	TRIM28	Q13263	MAD	0	1	FALSE
HTP0393A	Plasma	SciLifeLab peptide array	TRIM33_HPRR640002	MQPHLQRQHSNPGHAGPFPVVSVHNTTINPTSPTTATMANANRGPTSPSVTAIELIPSVTNPENLPSLPDIPPIQLEDAGSSSLDNLLSRYISGSHLPPQPTSTMNPSPGPSALSPGSSGLSNSHTPVRPPSTSSTGSR	TRIM33	Q9UPN9	MAD	0	7	FALSE
HTP0393A	Plasma	SciLifeLab peptide array	TROVE2_HPRR400060	ESVNQMQPLNEKQIANSQDGYVWQVTDMNRLHRFLCFGSEGGTYYIKEQKLGLENAEALIRLIEDGRGCEVIQEIKSFSQEGRTTKQEPMLFALAICSQCSDISTKQAAFKAVSEVCRIPTHLFTFIQFKKDLKESMKCGMWG	TROVE2	P10155	MAD	2	4	FALSE
HTP0393A	Plasma	SciLifeLab peptide array	TROVE2_HPRR400061	FLLAVDVSASMNQRVLGSILNASTVAAAMCMVVTRTEKDSYVVAFSDEMVPCPVTTDMTLQQVLMAMSQIPAGGTDCSLPMIWAQKTNTPADVFIVFTDNETFAGGVHPAIALREYRKKMDIPAKLIVCGMTSNGF	TROVE2	P10155	MAD	-2	-2	FALSE
HTP0393A	Plasma	SciLifeLab peptide array	TRPC3_HPRR2870071	NFPKCRRRRLQKDIEMGMGNSKSRLNLFTQSNSRVFESHSFNSILNQPTRYQQI	TRPC3	Q13507	MAD	0	2.1	FALSE
HTP0393A	Plasma	SciLifeLab peptide array	TSGA10_HPRR2920463	IASLGESLAMKEKTISGMKNIIAEMEQASRQCTEALIVCEQDVSRMRRQLDETNDELAQIARERDILAHDNDNLQEQFAKAKQENQ	TSGA10	Q9BZW7	MAD	37	19.9	TRUE
HTP0393A	Plasma	SciLifeLab peptide array	TSGA10_HPRR2920464	RREMMKSCKSPKSTTAHAILRRVETERDVAFTDLRRMTTERDSLRERLKIAQETAFNEKAHLEQRIEELECTVHNLDDERMEQMSNM	TSGA10	Q9BZW7	MAD	0	19.3	FALSE
HTP0393A	Plasma	SciLifeLab peptide array	TSHR_HPRR141622	RADLSYPSHCCAFKNQKKIRGILESLMCNESSMQSLRQRKSVNALNSPLHQEYEENLGDSIVGYKEKSKFQDTHNNAHYYVFFEEQEDEIIGFGQELKNPQEETLQAFDSHYDYTICGDSEDMVCTPKSDEFNPC	TSHR	P16473	MAD	-1	-1	FALSE
HTP0393A	Plasma	SciLifeLab peptide array	TSHR_HPRR4220232	MGCSSPPCECHQEEDFRVTCKDIQRIPSLPPSTQTLKLIETHLRTIPSHAFSNLPNISRIYVSIDVTLQQLESHSF	TSHR	P16473	MAD	-1	-1	FALSE
HTP0393A	Plasma	SciLifeLab peptide array	TTN_HPRR1830052	GTVSTSCYLAVQVSEEFEKETTAVTEKFTTEEKRFVESRDVVMTDTSLTEEQAGPGEPAAPYFITKPVVQKLVEGGSVVFGCQVGGNPKPHVYWKKSGVPLTTGYRYKVSYNKQTGECKLVISMTFADDAGEYT	TTN	Q8WZ42	MAD	-1	7	FALSE
HTP0393A	Plasma	SciLifeLab peptide array	TTN_HPRR1830053	HFLSILTIDTSDAEDYSCVLVEDENVKTTAKLIVEGAVVEFVKELQDIEVPESYSGELECIVSPENIEGKWYHNDVELKSNGKYTITSRRGRQNLTVKDVTKEDQGEYSFVIDGKKTTCKLKMK	TTN	Q8WZ42	MAD	1	4.1	FALSE
HTP0393A	Plasma	SciLifeLab peptide array	UBA1_HPRR232462	KISFKSLVASLAEPDFVVTDFAKFSRPAQLHIGFQALHQFCAQHGRPPRPRNEEDAAELVALAQAVNARALPAVQQNNLDEDLIRKLAYVAAGDLAPINAFIGGLAAQEVMKACSGKFMPIMQWLYFDALECLPEDKEVLTEDKCLQR	UBA1	P22314	MAD	0	3	FALSE
HTP0393A	Plasma	SciLifeLab peptide array	UBA1_HPRR232463	LYKVVQGHRQLDSYKNGFLNLALPFFGFSEPLAAPRHQYYNQEWTLWDRFEVQGLQPNGEEMTLKQFLDYFKTEHKLEITMLSQGVSMLYSFFMPAAKLKERLDQPMTEIVSRVSKRKLGRHVRALVLELCCNDESGEDVEVPYVRYTIR	UBA1	P22314	MAD	3	5	FALSE
HTP0393A	Plasma	SciLifeLab peptide array	UGT1A1_HPRR3790923	SHWLSMLGAIQQLQQRGHEIVVLAPDASLYIRDGAFYTLKTYPVPFQREDVKES	UGT1A1	P22309	MAD	-1	0	FALSE
HTP0393A	Plasma	SciLifeLab peptide array	UGT1A5*_HPRR4420458	HRSCVELLHNEALIRHLHATSFDVVLTDP	UGT1A5*	P35504;P22310;P35503	MAD	-1	7.1	FALSE
HTP0393A	Plasma	SciLifeLab peptide array	UGT1A6_HPRR3761044	WLSMKDIVEVLSDRGHEIVVVVPEVNLLLKESKYYTRKIYPVPYDQEELKNRYQSFGNNHFAERSFLTAPQTEYRNNMIVIGLY	UGT1A6	P19224	MAD	-2	0	FALSE
HTP0393A	Plasma	SciLifeLab peptide array	UGT1A8*_HPRR3340348	QPVKPLDRAVFWIEFVMRHKGAKHLRVAAHDLTWFQYHSL	UGT1A8*	Q9HAW9;Q9HAW8;O60656;Q9HAW7;P19224;P35504;P22310;P35503;P22309;O75795;P54855;P36537;Q6UWM9;P16662;O75310;Q9BY64;P06133;Q9Y4X1	MAD	0	1	FALSE
HTP0393A	Plasma	SciLifeLab peptide array	UGT2A1_HPRR1951665	KEHNVTVLVASGALFITPTSNPSLTFEIYKVPFGKERIEGVIKDFVLTWLENRPSPSTIWRFYQEMAKVIKDFHMVSQEICDGVLKNQQLMAKLKKSKFEVLVSDPVFPCGDIVALKLGIPFMYS	UGT2A1	Q9Y4X1	MAD	5	6	FALSE
HTP0393A	Plasma	SciLifeLab peptide array	VCL_HPRR350132	KMIDERQQELTHQEHRVMLVNSMNTVKELLPVLISAMKIFVTTKNSKNQGIEEALKNRNFTVEKMSAEINEIIRVLQLTSWDEDAWASKDTEAMKRALASIDSKLNQAKGWLRDPSASPGDAGEQAIRQILDEAGKVGELCAGKERREI	VCL	P18206	MAD	0	6.1	FALSE
HTP0393A	Plasma	SciLifeLab peptide array	VCL_HPRR4160211	SALTSKLADLRRQGKGDSPEARALAKQVATALQNLQTKTNRAVANSRPAKAAVHLEGKIEQAQRWIDNPTVDDRGVGQAAIRGLVAEGHRLANVMMGP	VCL	P18206	MAD	1	4	FALSE
HTP0393A	Plasma	SciLifeLab peptide array	VIM_HPRR370004	FANYIDKVRFLEQQNKILLAELEQLKGQGKSRLGDLYEEEMRELRRQVDQLTNDKARVEVERDNLAEDIMRLREKLQEEMLQREEAENTLQSFRQDVDNASLARLDLERKVES	VIM	P08670	MAD	1	2	FALSE
HTP0393A	Plasma	SciLifeLab peptide array	WARS_HPRR141609	TDSDCIGKISFPAIQAAPSFSNSFPQIFRDRTDIQCLIPCAIDQDPYFRMTRDVAPRIGYPKPALLHSTFFPALQGAQTKMSASDPNSSIFLTDTAKQIKTKVNKHAFSGGRDTIEEHRQFGGNCDVDVSFMYLTF	WARS	P23381	MAD	-1	0	FALSE
HTP0393A	Plasma	SciLifeLab peptide array	WARS_HPRR141610	DATEAEEDFVDPWTVQTSSAKGIDYDKLIVRFGSSKIDKELINRIERATGQRPHHFLRRGIFFSHRDMNQVLDAYENKKPFYLYTGRGPSSEAMHVGHLIPFIFTKWLQDVFNVPLVIQMTDDEKYLWKDLTLDQAYSYAVENA	WARS	P23381	MAD	3	6	FALSE
HTP0393A	Plasma	SciLifeLab peptide array	XKR6_HPRR2540593	YGVLHPTGPRAKILASSCCAELLWGIPLPPDVEPMAPEIPGYRGTQVTPTRAVTEQQEDLTADTCLPVFQVRPMGPPTPLGRPYLPEGPLIKIDMPR	XKR6	Q5GH73	MAD	-2	0.1	FALSE
HTP0393A	Plasma	SciLifeLab peptide array	XKR6_HPRR4040109	FVDRRLRRTINILQYVTPTAVGIRYRDGPLLYELLQYESSL	XKR6	Q5GH73	MAD	-1	1	FALSE
HTP0393A	Plasma	SciLifeLab peptide array	XKR8_HPRR3410225	GLLVWQQEEPSEFDLAYADFLALDISM	XKR8	Q9H6D3	MAD	-1	2.1	FALSE
HTP0393A	Plasma	SciLifeLab peptide array	XKR8_HPRR3410226	HPSCCWKPDPDQVDGARSLLSPEGYQLPQNRRMTHLAQKFFPKAKDEAASPVKG	XKR8	Q9H6D3	MAD	-1	2	FALSE
HTP0393A	Plasma	SciLifeLab peptide array	XKR9_HPRR2180234	FHPNRSAETKCDEIDGKPVLRECRMRYFLME	XKR9	Q5GH70	MAD	1	5.1	FALSE
HTP0393A	Plasma	SciLifeLab peptide array	YARS_HPRR2320095	GNVENNGVLSFIKHVLFPLKSEFVILRDEKWGGNKTYTAYVDLEKDFAAEVVHPGDLKNSVEVALNKLLDPIREKFNTPALKKLASAAYPDPSKQKPMAKGPAKNSEPEEVIPSRLDIRVGKIITVEKHPDAD	YARS	P54577	MAD	10	15.7	FALSE
HTP0393A	Plasma	SciLifeLab peptide array	YARS_HPRR2320096	VLCNLKPQKMRGVESQGMLLCASIEGINRQVEPLDPPAGSAPGEHVFVKGYEKGQPDEELKPKKKVFEKLQADFKISEECIAQWKQTNFMTKLGSIS	YARS	P54577	MAD	-1	1	FALSE
HTP0393A	Plasma	SciLifeLab peptide array	ZNF688_HPRR3610291	QWIHRSCSGGRRGRRPGIRAVPRAPVRGDRDPPVLFRHYPDIFEECG	ZNF688	P0C7X2	MAD	0	1	FALSE
HTP0393A	Plasma	SciLifeLab peptide array	ZNF688_HPRR3610292	GERLGGARRGDVPNRKEEEPEEVPRAKGPRKAPVKESPEVLVERNPDPAISVAPARAQPPKNAAWDPTTGAQ	ZNF688	P0C7X2	MAD	268	316.9	FALSE
HTP0090B	Plasma	SciLifeLab peptide array	A2M_HPRR350039	SVLLMKPDAELSASSVYNLLPEKDLTGFPGPLNDQDDEDCINRHNVYINGITYTPVSSTNEKDMYSFLEDMGLKAFTNSKIRKPKMCPQLQQYEMHGPEGLRVGFYESDVMGRGHARLVHVEEPHTETVRKYFPETWIWDLVVVNS	A2M	P01023	MAD	2	3	FALSE
HTP0090B	Plasma	SciLifeLab peptide array	AARS_HPRR3160056	DRASKADVQKRVLEKTKQFIDSNPNQPLVILEMESGASAKALNEALKLFKMHSPQTSAMLFTVDNEAGKITCLCQVPQNAANRGLKASEWVQQVSGLMDGKGGGKD	AARS	P49588	MAD	1	7.1	FALSE
HTP0090B	Plasma	SciLifeLab peptide array	AARS_HPRR3160058	EFTVKNAQVRGGYVLHIGTIYGDLKVGDQVWLFIDEPRRRPIMSNHTATHILNFALRSVLGEADQKGSLVAPDRLRFDFTAKGAMSTQQIKKAEEIANEMIEAAKAVYTQDCP	AARS	P49588	MAD	0	1	FALSE
HTP0090B	Plasma	SciLifeLab peptide array	ABCC8_HPRR2060003	DHLGKENDVFQPKTQFLGVYFVSSQ	ABCC8	Q09428	MAD	0	2	FALSE
HTP0090B	Plasma	SciLifeLab peptide array	ABCC8_HPRR4160072	VSVQKLSEFLSSAEIREEQCAPHEPTPQGPASKYQAVPLRVVNRKRPAREDCRGLTGPLQSLVPSADGDADNCCVQIMGGYFTWTPD	ABCC8	Q09428	MAD	0	1.1	FALSE
HTP0090B	Plasma	SciLifeLab peptide array	ACHE_HPRR2440120	RGIRLKTPGGPVSAFLGIPFAEPPMGPRRFLPPEPKQPWSGVVDATTFQSVCYQYVDTLYPGFEGTEMWNPNRE	ACHE	P22303	MAD	1	1.1	FALSE
HTP0090B	Plasma	SciLifeLab peptide array	ACHE_HPRR3870163	TVGMGEARRRATQLAHLVGCPPGGTGGNDTELVACLRTRPAQVLVNHEWHVLPQESVFRFSFVPVVDGDFLSDTPEALINAGDFHG	ACHE	P22303	MAD	1	1	FALSE
HTP0090B	Plasma	SciLifeLab peptide array	ACTA2*_HPRR3230094	PKANREKMTQIMFETFNTPAMYVAIQ	ACTA2*	P62736;P63267;A5A3E0;P0CG38;P0CG39;Q6S8J3;P63261;P60709;P68032;P68133;Q562R1	MAD	0	8	FALSE
HTP0090B	Plasma	SciLifeLab peptide array	ACTA2*_HPRR3230096	MVGMGQKDSYVGDEAQSKRGILTLKYPIEHGIVTNWD	ACTA2*	P62736;P63267;A5A3E0;P0CG38;P0CG39;Q6S8J3;P63261;P60709;P68032;P68133;Q562R1	MAD	0	0	FALSE
HTP0090B	Plasma	SciLifeLab peptide array	AIMP1_HPRR2310067	CNLKPAKMRGVLSQAMVMCASSPEKIEILAPPNGSVPGDRITFDAFPGEPDKELNPKKKIWEQIQPDLHTNDECVATYKGVPFEVKGKGVCRAQTMSNSGI	AIMP1	Q12904	MAD	-1	1	FALSE
HTP0090B	Plasma	SciLifeLab peptide array	AIMP1_HPRR2310068	MANNDAVLKRLEQKGAEADQIIEYLKQQVSLLKEKAILQATLREEKKLRVENAKLKKEIEELKQELIQAEIQNGV	AIMP1	Q12904	MAD	3	67.3	FALSE
HTP0090B	Plasma	SciLifeLab peptide array	AIMP1_HPRR2310069	TPLHANSMVSENVIQSTAVTTVSSGTKEQIKGGTGDEKKAKEKIEKKGEKKEKKQQSIAGSADSKPIDVSRLDLRIGCIITARKHPDADSLY	AIMP1	Q12904	MAD	1	38	FALSE
HTP0090B	Plasma	SciLifeLab peptide array	AIMP2_HPRR2440262	APLRVELPTCMYRLPNVHGRSYGPAPGAGHVQEESNLSLQALESRQDDILKRLYELKAAVDGLSKMIQTPDADLDVTNIIQADEPTTLTTNAL	AIMP2	Q13155	MAD	104	2.2	TRUE
HTP0090B	Plasma	SciLifeLab peptide array	AIMP2_HPRR2440263	SVLGKDYGALKDIVINANPASPPLSLLVLHRLLCEHFRVLSTVHTHSSVKSVPENLLKCFGEQNKKQPRQDYQLGFTLIWKNVPKTQ	AIMP2	Q13155	MAD	-3	-0.9	FALSE
HTP0090B	Plasma	SciLifeLab peptide array	AIMP2_HPRR2440264	IARFLFSLFGQKHNAVNATLIDSWVDIAIFQLKEGSSKEKAAVFRSMNSALGKSPWLAGNELTVADVVLWSVLQQIGGCSVTVPANVQRWMRSCENLAPFNTALKLLK	AIMP2	Q13155	MAD	1	2	FALSE
HTP0090B	Plasma	SciLifeLab peptide array	ALOX12_HPRR1960006	YAWVPNAPCTMRMPPPTTKEDVTMATVMGSLPDVRQACLQMAISWHLSRRQPDMVPLGHHKEKYFSGPKPKAVLNQFRTDLEKLEKEITARNEQLDWPYEY	ALOX12	P18054	MAD	0	1	FALSE
HTP0090B	Plasma	SciLifeLab peptide array	ALOX12_HPRR1960007	PGDNALDMFQKHREKELKDRQQIYCWATWKEGLPLTIAADRKDDLPPNMRFHEEKRLDFEWTLKAGALEMALKRVYTLLSSWNCLEDFDQIFWGQKSALAEKVRQCWQDDELFSYQFLNGANP	ALOX12	P18054	MAD	1	0	TRUE
HTP0090B	Plasma	SciLifeLab peptide array	ANO2_HPRR3070034	PTDISDQIKKEKSLLVDFFLKEEHEKLKLMDEPALRSPGGGDRSRSRAASSAPSGQSQLGSMMSSGSQHTNV	ANO2	Q9NQ90	MAD	6	8.2	FALSE
HTP0090B	Plasma	SciLifeLab peptide array	ANO2_HPRR3070036	EPVSLEARLSRMHFHDSQRKVDYVLAYHYRKRGVHLAQGFPGHSLAIVSNGETGKEPHAGGPGDIELGPLDALEEERKEQREEFEHNLM	ANO2	Q9NQ90	MAD	-1	17.4	FALSE
HTP0090B	Plasma	SciLifeLab peptide array	ANO2_HPRR3070037	IPLLPGSPRRLSPQAGSRGGQGPKHGQQCLKMPGPRAPGLQGGSNRDPGQPCGGESTRSSSVINNYLDAN	ANO2	Q9NQ90	MAD	0	1	FALSE
HTP0090B	Plasma	SciLifeLab peptide array	ANXA2_HPRR3460748	YDAGVKRKGTDVPKWISIMTERSVPHLQKVFDRYKSYSPYDMLESIRKEVKGDLENAFLNLVQCIQNKPLYFADRLYDSMKGKG	ANXA2	P07355	MAD	-1	0	FALSE
HTP0090B	Plasma	SciLifeLab peptide array	ANXA2_HPRR3460749	MGRQLAGCGDAGKKASFKMSTVHEILCKLSLEGDHSTPPSAYGSVKAYTNFDAERDALNIETAIKTKGVDEVTIVNI	ANXA2	P07355	MAD	0	48.1	FALSE
HTP0090B	Plasma	SciLifeLab peptide array	ANXA5_HPRR1350096	GTVTDFPGFDERADAETLRKAMKGLGTDEESILTLLTSRSNAQRQEISAAFKTLFGRDLLDDLKSELTGKFEKLIVALMKPSRLYDAYELKHALKGAGTNEKVLTEIIASRTPEELRAIKQVYEEEYGSSLEDDVVG	ANXA5	P08758	MAD	1	8.1	FALSE
HTP0090B	Plasma	SciLifeLab peptide array	ANXA5_HPRR1350097	LVVLLQANRDPDAGIDEAQVEQDAQALFQAGELKWGTDEEKFITIFGTRSVSHLRKVFDKYMTISGFQIEETIDRETSGNLEQLLLAVVKSIRSIPAYLAETLYYAMKGAG	ANXA5	P08758	MAD	6	11	FALSE
HTP0090B	Plasma	SciLifeLab peptide array	APOH_HPRR350085	EPGEEITYSCKPGYVSRGGMRKFICPLTGLWPINTLKCTPRVCPFAGILENGAVRYTTFEYPNTISFSCNTGFYLNGADSAKCTEEGKWSPELPVCAPIICPPPSIPTFATLRVYKPSAGNNSLYRDTAVFECLPQHAMFGNDTITC	APOH	P02749	MAD	4	4	FALSE
HTP0090B	Plasma	SciLifeLab peptide array	AQP4_HPRR4040261	MSDRPTARRWGKCGPLCTRENIMVAFKGVWTQAFWKA	AQP4	P55087	MAD	1	1	FALSE
HTP0090B	Plasma	SciLifeLab peptide array	ARFGAP1_HPRR3300073	TLPSMVHRVSGQPQSVTASSDKAFEDWLNDDLGSYQGAQGNRYVGFGNTPPPQKKEDDFLNNAMSSLYSGWSSFTTGASRFASAAKEGATKFGSQASQKASEL	ARFGAP1	Q8N6T3	MAD	309	324.3	FALSE
HTP0090B	Plasma	SciLifeLab peptide array	ARFGAP1_HPRR3300076	DHFQNSNIDQSFWETFGSAEPTKTRKSPSSDSWTCADTSTERRSSDSWEVWGSASTNRNSNSDGGEGGEGTKKAVPPAVPTDDGWD	ARFGAP1	Q8N6T3	MAD	0	9.1	FALSE
HTP0090B	Plasma	SciLifeLab peptide array	CACNA1S_HPRR3410011	EEEKSTMAKKLEQKPKGEGIPTTAKLKIDEFESNVNEVKDPYPSADFPGDDEEDEPEIPLSPRPRPLAEL	CACNA1S	Q13698	MAD	0	16.6	FALSE
HTP0090B	Plasma	SciLifeLab peptide array	CACNA1S_HPRR3410014	ESPVFLEDFPQDPRTNPLARANTNNANANVAYGNSNHSNSHVFSSVHYEREFPEETETPATRGRALGQPCRVLGPHSKPCVE	CACNA1S	Q13698	MAD	0	16	FALSE
HTP0090B	Plasma	SciLifeLab peptide array	CARS_HPRR400045	SQCNLYMAARKAVRKRPNQALLENIALYLTHMLKIFGAVEEDSSLGFPVGGPGTSLSLEATVMPYLQVLSEFREGVRKIAREQKVPEILQLSDALRDNILPELGVRFEDHEGLPTVVKLVDRNTLLKEREEKRRVE	CARS	P49589	MAD	2	3	FALSE
HTP0090B	Plasma	SciLifeLab peptide array	CARS_HPRR400046	HLFEQYREKRPEAAQLLEDVQAALKPFSVKLNETTDPDKKQMLERIQHAVQLATEPLEKAVQSRLTGEEVNSCVEVLLEEAKDLLSDWLDSTLGCDVTDNSIFSKLPKFWEGDFHRDMEALNVLPPDVL	CARS	P49589	MAD	-1	4	FALSE
HTP0090B	Plasma	SciLifeLab peptide array	CASR_HPRR3140049	ADDDYGRPGIEKFREEAEERDICIDFSELISQYSDEEEIQHVVEVIQNSTAKVIVVFSSGPDLEPLIKEIVRRNITGKIWLASEAWASSSLI	CASR	P41180	MAD	-1	-1	FALSE
HTP0090B	Plasma	SciLifeLab peptide array	CASR_HPRR3140052	GTVTFSLSFDEPQKNAMAHRNSTHQNSLEAQKSSDTLTRHQPLLPLQCGETDLDLTVQETGLQGPVGGDQRPEVEDPEELSPALVVSSSQSFVISGG	CASR	P41180	MAD	1	5.2	FALSE
HTP0090B	Plasma	SciLifeLab peptide array	CAST_HPRR3010396	STYIEELGKREVTIPPKYRELLAKKEGITGPPADSSKPIGPDDAIDALSSDFTCGSPTAAGKKTEKEESTEVLKAQSAGTVRSAAP	CAST	P20810	MAD	-2	6.5	FALSE
HTP0090B	Plasma	SciLifeLab peptide array	CAST_HPRR3010397	GPQNASSLKFEDAKLAAAISEVVSQTPASTTQAGAPPRDTSQSDKDLDDALDKLSDSLGQRQPDPDENKPMEDKVKE	CAST	P20810	MAD	-2	42.2	FALSE
HTP0090B	Plasma	SciLifeLab peptide array	CENPA_HPRR3730167	PSLGASSHQHSRRRQGWLKEIRKLQKSTHLL	CENPA	P49450	MAD	0	0	FALSE
HTP0090B	Plasma	SciLifeLab peptide array	CENPA_HPRR3890121	RKLPFSRLAREICVKFTRGVDFNWQAQALLAL	CENPA	P49450	MAD	0	2.1	FALSE
HTP0090B	Plasma	SciLifeLab peptide array	CENPB_HPRR3310037	ERGVVQQVKGHYRQAMLLKAMAALEGQDPSGLQLGLTEALHFVAAAWQAVEPSDIAACFREAGFGGGPNATITTSL	CENPB	P07199	MAD	-1	1.1	FALSE
HTP0090B	Plasma	SciLifeLab peptide array	CENPB_HPRR3310039	TFREKSRIIQEVEENPDLRKGEIARRFNIPPSTLSTILKNKRAILASERKYGVASTCRKTNKLSPYDKLEGLLIAWFQQIRAAGLPVKGIIL	CENPB	P07199	MAD	-1	0	FALSE
HTP0090B	Plasma	SciLifeLab peptide array	CENPE_HPRR1470072	EKIENLTRMLVTSSSLTLQQELKAKRKRRVTWCLGKINKMKNSNYADQFNIPTNITTKTHKLSINLLREIDESVCSESDVFSNTLDTLSEIEWNPATKLLNQENIESELNSLRADYDN	CENPE	Q02224	MAD	1	3.1	FALSE
HTP0090B	Plasma	SciLifeLab peptide array	CENPE_HPRR4340147	MRVKANLSLPYLQTKHIEKLFTANQRCSMEFHRIMKKLKYVLSYVTKIKEEQHESINKFEMDFIDEVEKQKELLIKIQHLQQDCDVPSRELRDLKLNQNMD	CENPE	Q02224	MAD	0	0.1	FALSE
HTP0090B	Plasma	SciLifeLab peptide array	CENPF_HPRR1390029	SCWKSENEKLLTQMESEKENLQSKINHLETCLKTQQIKSHEYNERVRTLEMDRENLSVEIRNLHNVLDSKSVEVETQKLAYMELQQKAEFSDQKHQKEIENMCLKTSQLTGQVEDLEHKLQLLSNEIMDKDRCYQDLHAEYE	CENPF	P49454	MAD	32	96.8	FALSE
HTP0090B	Plasma	SciLifeLab peptide array	CENPF_HPRR1390030	CISELSFSGPNALVPMDFLGNQEDIHNLQLRVKETSNENLRLLHVIEDRDRKVESLLNEMKELDSKLHLQEVQLMTKIEACIELEKIVGELKKENSDLSEKLEYFSCDHQEL	CENPF	P49454	MAD	-1	2	FALSE
HTP0090B	Plasma	SciLifeLab peptide array	CHD3_HPRR3420199	LKIKLGLLGGKREKGGSYVFQSDEGPEPEAEESDLDSGSVHSASGRPDGPVRTKKLKRGRPGRKKKKLLGCPA	CHD3	Q12873	MAD	1	1	FALSE
HTP0090B	Plasma	SciLifeLab peptide array	CHGA_HPRR300004	NSPMNKGDTEVMKCIVEVISDTLSKPSPMPVSQECFETLRGDERILSILRHQNLLKELQDLALQGAKERAHQQKKHSGFEDELSEVLENQSSQAELKEAVEEPSSKDVMEKREDSKEAEKSGEATDGARPQALPEPMQESK	CHGA	P10645	MAD	1	17.4	FALSE
HTP0090B	Plasma	SciLifeLab peptide array	CHRNA1_HPRR4110442	MKLGTWTYDGSVVAINPESDQPDLSNFMESGEWVIKESRGWKHSVTYSCCPDTPYLDITYHF	CHRNA1	P02708	MAD	1	3	FALSE
HTP0090B	Plasma	SciLifeLab peptide array	CLDN11*_HPRR2010004	NDWVVTCGYTIPTCRKLDELGSKGLWADCVMATGLYHCKPLVDILILPGY	CLDN11*	O75508	MAD	2	1	TRUE
HTP0090B	Plasma	SciLifeLab peptide array	CLDN11_HPRR2010005	DAQAFGENRFYYTAGSSSPTHAKSAHV	CLDN11	O75508	MAD	-1	3.3	FALSE
HTP0090B	Plasma	SciLifeLab peptide array	CNP_HPRR2500894	TLARVIVDKYRDGTKMVSADAYKITPGARGAFSEEYKRLDEDLAAYCRRRDIRILVLDDTNHERERLEQLFEMADQYQYQVVLVEPKTAWRLDCAQLKEKNQW	CNP	P09543	MAD	4	21.4	FALSE
HTP0090B	Plasma	SciLifeLab peptide array	CNP_HPRR2500896	PGVLHCTTKFCDYGKAPGAEEYAQQDVLKKSYSKAFTLTISALFVTPKTTGARVELSEQQLQLWPSDVDKLSPTDNLPRGSRAHITL	CNP	P09543	MAD	3	38.5	FALSE
HTP0090B	Plasma	SciLifeLab peptide array	COL17A1_HPRR3500044	NLPSHVWSSTLPAGSSMGTYHNNMTTQSSSLLNTNAYSAGSVFGVPNNMASCSPTLHPGLSTSSSVFGMQNNLAPSLTTLSHGTTTTSTA	COL17A1	Q9UMD9	MAD	0	0	FALSE
HTP0090B	Plasma	SciLifeLab peptide array	COL17A1_HPRR3500046	DGTEVTERIVTETVTTRLTSLPPKGGTSNGYAKTASLGGGSRLEKQSLTHGSSGYINSTGSTRGHASTSSYRRAHSPASTLPNSPGSTFERKTHVTR	COL17A1	Q9UMD9	MAD	10	10	FALSE
HTP0090B	Plasma	SciLifeLab peptide array	CPE_HPRR270004	VLSANLHGGDLVANYPYDETRSGSAHEYSSSPDDAIFQSLARAYSSFNPAMSDPNRPPCRKNDDDSSFVDGTTNGGAWYSVPGGMQDFNYLSSNCFEITVELSCEKFPPEETLKTYWEDNKNSLISYLEQIHR	CPE	P16870	MAD	1	5.1	FALSE
HTP0090B	Plasma	SciLifeLab peptide array	CPE_HPRR4180113	GNYKLTASAPGYLAITKKVAVPYSPAAGVDFELESFSERKEEEKEELMEWWKMMS	CPE	P16870	MAD	3	56.3	FALSE
HTP0090B	Plasma	SciLifeLab peptide array	CRYAB_HPRR2700063	RPFFPFHSPSRLFDQFFGEHLLESDLFPTSTSLSPFYLRPPSFLRAPSWFDTGLSEMRLEKDRFSVNLDVKHFSPEELKVKVLGDVIE	CRYAB	P02511	MAD	0	1	FALSE
HTP0090B	Plasma	SciLifeLab peptide array	CRYAB_HPRR3880249	KYRIPADVDPLTITSSLSSDGVLTVNGPRKQVSGPERTIPITREEKPAVTAA	CRYAB	P02511	MAD	2	7	FALSE
HTP0090B	Plasma	SciLifeLab peptide array	CYP11A1_HPRR2120012	RSVLVKGCQTFLSAPREGLGRLRVPTGEGAGISTRSPRPFNEIPSPGDNGWLNLYHFWRETGTHKVHLHHVQNFQKYGPIYREKLGNVESVYVIDPEDVALLFKSEGPNPERFLIPPWVAYHQYYQRPIGVLLKKSAA	CYP11A1	P05108	MAD	1	1	FALSE
HTP0090B	Plasma	SciLifeLab peptide array	CYP17A1_HPRR670228	PFLPRHGHMHNNFFKLQKKYGPIYSVRMGTKTTVIVGHHQLAKEVLIKKGKDFSGRPQMATLDIASNNRKGIAFADSGAHWQLHRRLAMATFALFKDGDQKLEKIICQEISTLCDMLATHNGQSIDISFPVFVAVTNVISL	CYP17A1	P05093	MAD	0	0	FALSE
HTP0090B	Plasma	SciLifeLab peptide array	CYP1A2_HPRR2760237	YQDFDKNSVRDITGALFKHSKKGPRASGNLIPQEKIVNLVNDIFGAGFDTVTTAISWSLMYLVTKPEIQRK	CYP1A2	P05177	MAD	0	1.1	FALSE
HTP0090B	Plasma	SciLifeLab peptide array	CYP21A2_HPRR3440127	LIGGTETTANTLSWAVVFLLHHPEIQQRLQEELDHELGPGASSSRVPYKDRARLPLLNATIAEV	CYP21A2	P08686	MAD	-1	1	FALSE
HTP0090B	Plasma	SciLifeLab peptide array	CYP21A2_HPRR3440129	GLTQKFGPIYRLHLGLQDVVVLNSKRTIEEAMVKKWADFAGRPEPLTYKLVSRNYPDLSLGDYSLLW	CYP21A2	P08686	MAD	0	0	FALSE
HTP0090B	Plasma	SciLifeLab peptide array	CYP2D6_HPRR3440145	EYDDPRFLRLLDLAQEGLKEESGFLREVLNAVPVLLHIPALAGKVLRFQKAFLTQLDELLTEHRMTWDPAQPPRDLTE	CYP2D6	P10635	MAD	0	2	FALSE
HTP0090B	Plasma	SciLifeLab peptide array	CYP2D6_HPRR3440146	KGTTLITNLSSVLKDEAVWKKPFRF	CYP2D6	P10635	MAD	0	6.1	FALSE
HTP0090B	Plasma	SciLifeLab peptide array	DARS_HPRR2370049	DKYPLAVRPFYTMPDPRNPKQSNSYDMFMRGEEILSGAQRIHDPQLLTERALHHGIDLEKIKAYIDSFRFGAPPHAGGGIGLERVTMLFLGLHNVRQTSMFPRD	DARS	P14868	MAD	4	5	FALSE
HTP0090B	Plasma	SciLifeLab peptide array	DARS_HPRR2370051	LHVQKIYVISLAEPRLPLQLDDAVRPEAEGEEEGRATVNQDTRLDNRVIDLRTSTSQAVFRLQSGICHLFRETLINKGFVEIQTPKIISAASEGGANVFTVSYFKNNAYLAQSPQLYKQMCICAD	DARS	P14868	MAD	10	10	FALSE
HTP0090B	Plasma	SciLifeLab peptide array	DBT_HPRR2550879	YVCFFGYPSFKYSHPHHFLKTTAALRGQVVQFKLSDIGEGIREVTVKEWYVKEGDTVSQFDSICEVQSDKASVTI	DBT	P11182	MAD	-1	2	FALSE
HTP0090B	Plasma	SciLifeLab peptide array	DBT_HPRR2550880	VGKPLVDIETEALKDSEEDVVETPAVSHDEHTHQEIKGRKTLATPAVRRLAMENNIKLSEVVGSGKDGRILKEDILNYLEKQ	DBT	P11182	MAD	8	10.1	FALSE
HTP0090B	Plasma	SciLifeLab peptide array	DBT_HPRR2550882	LQFPILNASVDENCQNITYKASHNIGIAMDTEQGLIVPNVKNVQICSIFDIATELNRLQKLGSVGQLSTTDLTGGTFTLSNIGSIGGTFAKPVIMPPEVAIGA	DBT	P11182	MAD	1	7.9	FALSE
HTP0090B	Plasma	SciLifeLab peptide array	DLAT_HPRR3050438	LLPALSPTMTMGTVQRWEKKVGEKLSEGDLLAEIETDKATIGFEVQEEGYLAKILVPEGTRDVPLGTPLCIIVEKEADISAFADYRPTEVTDLKPQVPPPT	DLAT	P10515	MAD	0	49.5	FALSE
HTP0090B	Plasma	SciLifeLab peptide array	DLST_HPRR140690	QNTCAMLTTFNEIDMSNIQEMRARHKEAFLKKHNLKLGFMSAFVKASAFALQEQPVVNAVIDDTTKEVVYRDYIDISVAVATPRGLVVPVIRNVEAMNFADIERTITELGEKARKNELAIEDMDGGTFTISNGGVFGSLFGTPII	DLST	P36957	MAD	5	1	TRUE
HTP0090B	Plasma	SciLifeLab peptide array	DLST_HPRR4210012	PLCVSGVQPLALRLPEGELPSRETFPACINNS	DLST	P36957	MAD	0	0.1	FALSE
HTP0090B	Plasma	SciLifeLab peptide array	DPF2_HPRR2250142	SFPSIKPDTDQTLKKEGLISQDGSSLEALLRTDPLEKRGAPDPRVDDDSLGEFPVTNSRARKRILEPDDFLDDLDDEDYEEDTPKRRGKGKSKGKGVGS	DPF2	Q92785	MAD	2	11.1	FALSE
HTP0090B	Plasma	SciLifeLab peptide array	DPF2_HPRR3890698	AEEEGEDKEDSQPPTPVSQRSEEQKSKKGPDGLALPNNY	DPF2	Q92785	MAD	-1	1	FALSE
HTP0090B	Plasma	SciLifeLab peptide array	DSC1_HPRR1950849	SCTGTLVVHLDDYNDHAPQIDKEVTICQNNEDFAVLKPVDPDGPENGPPFQFFLDNSASKNWNIEEKDGKTAILRQRQNLDYNYYSVPIQIKDRHGLVATHMLTVRVCDCSTPSECRMKDKSTR	DSC1	Q08554	MAD	0	5.6	FALSE
HTP0090B	Plasma	SciLifeLab peptide array	DSG1_HPRR1370121	SLQLSIGVRNKAEFHHSIMSQYKLKASAISVTVLNVIEGPVFRPGSKTYVVTGNMGSNDKVGDFVATDLDTGRPSTTVRYVMGNNPADLLAVDSRTGKLTLKNKVTKEQYNMLGGKYQGTILSIDDNLQRTCTGT	DSG1	Q02413	MAD	2	2	FALSE
HTP0090B	Plasma	SciLifeLab peptide array	DSG1_HPRR4180926	EPVPECSDGAIHSWAVEGPQPEPRDITTVIPQIPPDNANIIECIDNSGVYTNEYGGREMQDLGGGERMTGFELTEGVKTSGMPEICQEYSG	DSG1	Q02413	MAD	4	10.5	FALSE
HTP0090B	Plasma	SciLifeLab peptide array	DSG3_HPRR3120202	FRPASKTFTVQKGISSKKLVDYILGTYQAIDEDTNKAASNVKYVMGRNDGGYLMIDSKTAEIKFVKNMNRDSTFIVNKTITAEVLAIDEYTGKTSTGTVYVRVPDFND	DSG3	P32926	MAD	4	6	FALSE
HTP0090B	Plasma	SciLifeLab peptide array	DSG3_HPRR3120203	SSPSVVVSARTLNNRYTGPYTFALEDQPVKLPAVWSITTLNATSALLRAQEQIPPGVYHISLVLTDSQNNRCEMPRSLTLEVCQCDNRGICGTSY	DSG3	P32926	MAD	-1	1	FALSE
HTP0090B	Plasma	SciLifeLab peptide array	DST_HPRR2620326	KPRCQNVAEDMDIQLCASILNENSDENENINTMILLDKMHSCSSLEKQQRVNVVQLASPSENNLVTEKSNLPEYTTEIAGKSKENLLNHE	DST	Q03001	MAD	37	28.3	TRUE
HTP0090B	Plasma	SciLifeLab peptide array	DST_HPRR2620328	MLPGEHQQVLSNLQSRFEDFLEDSQESQVFSGSDITQLEKEVNVCKQYYQELLKSAEREEQEESVYNLYISEVRNIRLRLENCEDRLIRQIRTPLERDDLHESVF	DST	Q03001	MAD	2	4.2	FALSE
HTP0090B	Plasma	SciLifeLab peptide array	EGFR_HPRR290109	QQGFFSSPSTSRTPLLSSLSATSNNSTVACIDRNGLQSCPIKEDSFLQRYSSDPTGALTEDSIDDTFLPVPEYINQSVPKRPAGSVQNPVYHNQPLNPAPSRDPHYQDPHSTAVGNPEYLNTVQPTCVNSTFDSPAHWAQKGSHQISLD	EGFR	P00533	MAD	-2	25.1	FALSE
HTP0090B	Plasma	SciLifeLab peptide array	ENO3*_HPRR3360053	DGTENKSKFGANAILGVSLAVCKAG	ENO3*	P13929;P09104;P06733	MAD	0	0	FALSE
HTP0090B	Plasma	SciLifeLab peptide array	ENO3*_HPRR4290181	QACKLAQENGWGVMVSHRSGETEDTFIADLVVGLCTGQIKTGAPCRSERLAKYNQLMRIEEE	ENO3*	P13929;P09104;P06733	MAD	-1	0.1	FALSE
HTP0090B	Plasma	SciLifeLab peptide array	ENO3*_HPRR4370068	LKNVIKEKYGKDATNVGDEGGFAPNIL	ENO3*	P13929;P09104;P06733	MAD	2	10.1	FALSE
HTP0090B	Plasma	SciLifeLab peptide array	ENO3_HPRR252476	ALELLKTAIQAAGYPDKVVIGMDVAASEFYRNGKYDLDFKSPDDPARHITGEKLGELYKSFIKNYPVVSIEDPFDQDDWATWTSFLSGVNIQIVGDDLTVTN	ENO3	P13929	MAD	4	6	FALSE
HTP0090B	Plasma	SciLifeLab peptide array	F12_HPRR350057	YHKCTHKGRPGPQPWCATTPNFDQDQRWGYCLEPKKVKDHCSKHSPCQKGGTCVNMPSGPHCLCPQHLTGNHCQKEKCFEPQLLRFFHKNEIWYRTEQAAVARCQCKGPDA	F12	P00748	MAD	-2	-0.9	FALSE
HTP0090B	Plasma	SciLifeLab peptide array	F2_HPRR350027	VRRQECSIPVCGQDQVTVAMTPRSEGSSVNLSPPLEQCVPDRGQQYQGRLAVTTHGLPCLAWASAQAKALSKHQDFNSAVQLVENFCRNPDGDEEGVWCYVAGKPGDFGYCDLNY	F2	P00734	MAD	4	4	FALSE
HTP0090B	Plasma	SciLifeLab peptide array	F2_HPRR3790030	EGVWCYVAGKPGDFGYCDLNYCEEAVEEETGDGLDEDSDRAIEGRTATSEYQTFFNPRTFGSGEADCGLRPLFEKKSLE	F2	P00734	MAD	30	22.5	TRUE
HTP0090B	Plasma	SciLifeLab peptide array	F2_HPRR3790031	FEALESSTATDVFWAKYTACETARTPRDKLAACLEGNCAEGLGTNYRGHVNITRSGIECQLWRSRYPHKPEINSTTHPGADLQ	F2	P00734	MAD	-1	7.6	FALSE
HTP0090B	Plasma	SciLifeLab peptide array	F8_HPRR232500	FTQPLYRGELNEHLGLLGPYIRAEVEDNIMVTFRNQASRPYSFYSSLISYEEDQRQGAEPRKNFVKPNETKTYFWKVQHHMAPTKDEFDCKAWAYFSDVDLEKDVHSGLIGPLLVCHTNTLNPAHGRQVTVQEFAL	F8	P00451	MAD	1	4.1	FALSE
HTP0090B	Plasma	SciLifeLab peptide array	F8_HPRR232926	ESKAISDAQITASSYFTNMFATWSPSKARLHLQGRSNAWRPQVNNPKEWLQVDFQKTMKVTGVTTQGVKSLLTSMYVKEFLISSSQDGHQWTLFFQNGKVKVFQGNQDSFTPVVNSLDPPLLTRYLRIHPQSWVHQIALRMEVLGCEA	F8	P00451	MAD	0	0	FALSE
HTP0090B	Plasma	SciLifeLab peptide array	FARS2_HPRR2010057	GTPLFSVYDNLSPVVTTWQNFDSLLIPADHPSRKKGDNYYLNRTHMLRAHTSAHQWDLLHAGLDAFLVVGDVYRRDQIDSQHYPIFHQLEAVRLFSKHELFAGIKDGES	FARS2	O95363	MAD	0	1	FALSE
HTP0090B	Plasma	SciLifeLab peptide array	FARSA_HPRR400146	EVIEAELRSTKHWELTAEGEEIAREGSHEARVFRSIPPEGLAQSELMRLPSGKVGFSKAMSNKWIRVDKSAADGPRVFRVVDSMEDEVQRRLQLVRGGQAEKLGEKERSELRKRKLLAEVTLKTYWVSKG	FARSA	Q9Y285	MAD	-2	1	FALSE
HTP0090B	Plasma	SciLifeLab peptide array	FHL1_HPRR252319	RFTAVEDQYYCVDCYKNFVAKKCAGCKNPITGFGKGSSVVAYEGQSWHDYCFHCKIRRAPPLSNN	FHL1	Q13642	MAD	-2	-1	FALSE
HTP0090B	Plasma	SciLifeLab peptide array	FLG_HPRR2551092	SERWSGSASRNHLGSAWEQSRDGSRHPGSHHEDRAGHGHSADSSRQSGTRHTESSSRGQAASSHEQARSSAGERHGSRHQLQSA	FLG	P20930	MAD	17	12	TRUE
HTP0090B	Plasma	SciLifeLab peptide array	FLG_HPRR2551093	SADSSRQSGTPHAETSSGGQAASSHEQARSSPGERHGSRHQQSADSSRHSGIPRRQASSAVRDSGHWGSSGSQASDSEGHSEESDTQSVSGHGQDGPHQQSHQESAR	FLG	P20930	MAD	-1	1	FALSE
HTP0090B	Plasma	SciLifeLab peptide array	FLG_HPRR2551094	RKRLSERLEEKEDNEEGVYDYENTGRMTQKWIQSGHIATYYTIQDEAYDTTDSLLEENKIYERSRSSDGKSSSQVNRSRHENTSQVPLQESR	FLG	P20930	MAD	8	14	FALSE
HTP0090B	Plasma	SciLifeLab peptide array	FLNA_HPRR232447	VICVRFGGEHVPNSPFQVTALAGDQPSVQPPLRSQQLAPQYTYAQGGQQTWAPERPLVGVNGLDVTSLRPFDLVIPFTIKKGEITGEVRMPSGKVAQPTITDNKDGTVTVRYAPSEAGLHEMDIRYDNMHIPGSPLQFYVDYVNCGHVT	FLNA	P21333	MAD	0	2	FALSE
HTP0090B	Plasma	SciLifeLab peptide array	FLNB_HPRR1310070	HGKVGEAGLLSVDCSEAGPGALGLEAVSDSGTKAEVSIQNNKDGTYAVTYVPLTAGMYTLTMKYGGELVPHFPARVKVEPAVDTSRIKVFGPGIEGKDVFREATTDFTV	FLNB	O75369	MAD	0	7.1	FALSE
HTP0090B	Plasma	SciLifeLab peptide array	FLNC_HPRR1310054	DPVPKSPFVVNVAPPLDLSKIKVQGLNSKVAVGQEQAFSVNTRGAGGQGQLDVRMTSPSRRPIPCKLEPGGGAEAQAVRYMPPEEGPYKVDITYDGHPVPGSPFAVEGVLPPDPSKVC	FLNC	Q14315	MAD	8	17.2	FALSE
HTP0090B	Plasma	SciLifeLab peptide array	FLNC_HPRR1310055	HSLHETSTVLVETVTKSSSSRGSSYSSIPKFSSDASKVVTRGPGLSQAFVGQKNSFTVDCSKAGTNMMMVGVHGPKTPCEEVYVKHMGNRVYNVTYTVKEKGDY	FLNC	Q14315	MAD	0	2	FALSE
HTP0090B	Plasma	SciLifeLab peptide array	FN1_HPRR2050095	AQQMVQPQSPVAVSQSKPGCYDNGKHYQINQQWERTYLGNALVCTCYGGSRGFNCESKPEAEETCFDKYTGNTYRVGDTYERPKDSMIWDCTCIGAGRGRISCTIANRCHEGGQSYKIGDTWRRPHETGGYMLECVCLGNGKGEW	FN1	P02751	MAD	-2	1	FALSE
HTP0090B	Plasma	SciLifeLab peptide array	FN1_HPRR2050096	HEEICTTNEGVMYRIGDQWDKQHDMGHMMRCTCVGNGRGEWTCIAYSQLRDQCIVDDITYNVNDTFHKRHEEGHMLNCTCFGQGRGRWKCDPVDQCQDSETGTFYQIGDSWEKYVHGVRYQCYCYGRGIG	FN1	P02751	MAD	1	2	FALSE
HTP0090B	Plasma	SciLifeLab peptide array	FTCD_HPRR2280077	MRLPKNIPEEKDRRTAALQEGLRRAVSVPLTLAETVASLWLALQELARCGNLACRSDLQVAAKALEMGVFGAYFNVLINLRDITDEAFKDQIHHRV	FTCD	O95954	MAD	2	2	FALSE
HTP0090B	Plasma	SciLifeLab peptide array	FTCD_HPRR2890163	GVSVDECVLCAQAFGQRLAEELDVPVYLYGEAARMDSRRTLPAIRAGEYEALPKKLQQADWAPDFGPSSF	FTCD	O95954	MAD	28	115.6	FALSE
HTP0090B	Plasma	SciLifeLab peptide array	FTCD_HPRR2890164	MSQLVECVPNFSEGKNQEVIDAISGAITQTPGCVLLDVDAGPSTNRTVYTFVGPPECVVEGALNAARVASRLIDMSRHQGEH	FTCD	O95954	MAD	-1	4.1	FALSE
HTP0090B	Plasma	SciLifeLab peptide array	FTCD_HPRR2890165	TKEQAHRIALNLREQGRGKDQPGRLKKVQGIGWYLDEKNLAQVSTNLLDFEVTALHTVYEETCREAQELSLPVVGSQLVGLVPLKALLD	FTCD	O95954	MAD	0	1	FALSE
HTP0090B	Plasma	SciLifeLab peptide array	G6PC2_HPRR4090002	INSEMFLLSCRGGNNYTLSF	G6PC2	Q9NQR9	MAD	1	2	FALSE
HTP0090B	Plasma	SciLifeLab peptide array	GAD1_HPRR2920425	QSSKNLLSCENSDRDARFRRTETDFSNLFARDLLPAKNGEEQTVQFLLEVVDILLNYVRKTFDRS	GAD1	Q99259	MAD	0	1	FALSE
HTP0090B	Plasma	SciLifeLab peptide array	GAD1_HPRR2920426	SSATSSNAGADPNTTNLRPTTYDTWCGVAHGCTRKLGLKICGFLQRTNSLEEKSRLVSAFKER	GAD1	Q99259	MAD	-1	0	FALSE
HTP0090B	Plasma	SciLifeLab peptide array	GAD2_HPRR3020281	SGFWSFGSEDGSGDSENPGTARAWCQVAQKFTGGIGNKLCALLYGDAEKPAESGGSQPPRAAARKAACACDQKPCSCSKVDVNYAFLHATDLLP	GAD2	Q05329	MAD	-1	-0.9	FALSE
HTP0090B	Plasma	SciLifeLab peptide array	GAD2_HPRR3890856	STKVIDFHYPNELLQEYNWELADQPQNLEEILMHCQTTLKYAIKTGHPRY	GAD2	Q05329	MAD	-2	0	FALSE
HTP0090B	Plasma	SciLifeLab peptide array	GARS_HPRR2440240	KLMSDKKCSVEKKSEMESVLAQLDNYGQQELADLFVNYNVKSPITGNDLSPPVSFNLMFKTFIGPGGNMPGYLRPETAQGIFLNFKRLLEFNQGKLPFAAAQI	GARS	P41250	MAD	3	3	FALSE
HTP0090B	Plasma	SciLifeLab peptide array	GARS_HPRR2440243	LPLSQNQEFMPFVKELSEALTRHGVSHKVDDSSGSIGRRYARTDEIGVAFGVTIDFDTVNKTPHTATLRDRDSMRQIRAEISELPSIVQDLANGNITWADVEARYPLFEG	GARS	P41250	MAD	2	7.1	FALSE
HTP0090B	Plasma	SciLifeLab peptide array	GIF_HPRR3050322	LFGQVLKDIVEKISMKIKDNGIIGDIYSTGLAMQALSVTPEPSKKEWNCKKTTDMILNEIKQGKFHNPMSIAQILPSLKGKTYLDVPQVTCSPDHEVQPTLPSNP	GIF	P27352	MAD	-1	1.1	FALSE
HTP0090B	Plasma	SciLifeLab peptide array	GIF_HPRR3050324	TSSAYPNPSILIAMNLAGAYNLKAQKLLTYQLMSSDNNDLTIGQLGLTIMALTSSCRDPGDKVSILQRQMENWAPSSPNAEASAFYGPSLAILALCQKNS	GIF	P27352	MAD	0	1.1	FALSE
HTP0090B	Plasma	SciLifeLab peptide array	GLRA1_HPRR2140062	LLRFRRKRRHHKEDEAGEGRFNFSAYGMGPACLQAKDGISVKGANNSNTTNPPPAPSKSPEEMRKLFIQRAKKIDK	GLRA1	P23415	MAD	2	2.1	FALSE
HTP0090B	Plasma	SciLifeLab peptide array	GOLGB1_HPRR1951658	RLSGLANVVLHELSGDDDTDQNMRAPLDPELHQESDMEFNNTTQEDVQERLAYAEQLVVELKDIIRQKDVQLQQKDEALQEERKAADNKIKKLKLHAKAKLTSLNKYIEEMKAQGGTVLPTEPQSEEQLSKHD	GOLGB1	Q14789	MAD	-1	-1	FALSE
HTP0090B	Plasma	SciLifeLab peptide array	GOLGB1_HPRR1951659	KHDNQTNVTEEGTQSIPGETEEQDSLSMSTRPTCSESVPSAKSANPAVSKDFSSHDEINNYLQQIDQLKERIAGLEEEKQKNKEFSQTLENEKNTLLSQISTKDGELKMLQEEVTKMNLLNQQIQEELS	GOLGB1	Q14789	MAD	1	6.2	FALSE
HTP0090B	Plasma	SciLifeLab peptide array	GPR62_HPRR2770122	PVRLALGRLSRRALPGPVRACTPQAWHPRALLQCLQRPPEGPAVGPSEAPEQTPELAGGRSPAYQGPPESSL	GPR62	Q9BZJ7	MAD	5	39.3	FALSE
HTP0090B	Plasma	SciLifeLab peptide array	GYPA_HPRR2110422	TSSSVTKSYISSQTNDTHKRDTYAATPRAHEVSEISVRTVYPPEEETGERVQLAHHFSEP	GYPA	P02724	MAD	1	3	FALSE
HTP0090B	Plasma	SciLifeLab peptide array	GYPE*_HPRR3290141	TTGVAMHTSTSSSVTKSYISSQTN	GYPE*	P15421;P06028;P02724	MAD	-1	0	FALSE
HTP0090B	Plasma	SciLifeLab peptide array	HARS_HPRR3010485	MAERAALEELVKLQGERVRGLKQQKASAELIEEEVAKLLKLKAQLGPDESKQKFVLKTPKGTRD	HARS	P12081	MAD	2	6.1	FALSE
HTP0090B	Plasma	SciLifeLab peptide array	HARS_HPRR4040036	DGVIKLRSVTSREEVDVRREDLVEEIKRRTGQPLCIC	HARS	P12081	MAD	1	3.1	FALSE
HTP0090B	Plasma	SciLifeLab peptide array	HDC_HPRR1320013	LKGPNCLTENVLKEIAKAGRLFLIPATIQDKLIIRFTVTSQFTTRDDILRDWNLIRDAATLILSQHCTSQPSPRVGNLISQIRGARAWACGTSLQSVSGAGDDPVQARKIIKQPQRVGAGPMKRENGLHLETLLDPVDDCFSE	HDC	P19113	MAD	-2	0	FALSE
HTP0090B	Plasma	SciLifeLab peptide array	HDC_HPRR1320014	PALTSWPSLLGDMLADAINCLGFTWASSPACTELEMNVMDWLAKMLGLPEHFLHHHPSSQGGGVLQSTVSESTLIALLAARKNKILEMKTSEPDADESCLNARLVAYASDQAHSSVEK	HDC	P19113	MAD	2	4.1	FALSE
HTP0090B	Plasma	SciLifeLab peptide array	HINT2_HPRR2470372	GQVRGAAGVTDGNEVAKAQQATPGGAAPTIFSRILDKSLPADILYEDQQCLVFRDVAPQAPVHFLVIPKKP	HINT2	Q9BX68	MAD	1	3	FALSE
HTP0090B	Plasma	SciLifeLab peptide array	HINT2_HPRR2470373	IPRISQAEEEDQQLLGHLLLVAKQTAKAEGLGDGYRLVINDGKLGAQSVYHLHIHVLGGRQLQWP	HINT2	Q9BX68	MAD	-1	0	FALSE
HTP0090B	Plasma	SciLifeLab peptide array	HMGCR_HPRR650031	MAGSIGGYNAHAANIVTAIYIACGQDAAQNVGSSNCITLMEASGPTNEDLYISCTMPSIEIGTVGGGTNLLPQQACLQMLGVQGACKDNPGENARQLARIVCGTVMAGELSLMAALAAGHLVKSHMIHNRSKINLQDLQG	HMGCR	P04035	MAD	4	2.1	TRUE
HTP0090B	Plasma	SciLifeLab peptide array	IAPP_HPRR3830128	LVHSSNNFGAILSSTNVGSNTYGKRNAVEVLKREPLNYLP	IAPP	P10997	MAD	-3	1	FALSE
HTP0090B	Plasma	SciLifeLab peptide array	IARS_HPRR2470884	NWYVRMNRRRLKGENGMEDCVMALETLFSVLLSLCRLMAPYTPFLTELMYQNLKVLIDPVSVQDKDTLSIHYLMLPRVREELIDKKTESAVSQMQSVIEL	IARS	P41252	MAD	-1	4.3	FALSE
HTP0090B	Plasma	SciLifeLab peptide array	IARS_HPRR2470886	AREVINRIQKLRKKCNLVPTDEITVYYKAKSEGTYLNSVIESHTEFIFTTIKAPLKPYPVSPSDKVLIQEKTQLKGSELEITLTRGSSLPGPACAYVNLNICANGSEQGGVLL	IARS	P41252	MAD	7	1	TRUE
HTP0090B	Plasma	SciLifeLab peptide array	ICA1_HPRR1510003	DELLDMKSEEGACLGPVAGTPEPEGADKDDLLLLSEIFNASSLEEGEFSKEWAAVFGDGQVKEPVPTMALGEPDPKAQTGSGFLPSQLLDQNMKDLQASLQEPAKAASDLTAWFSLFADLDPLSNPDAVGKTDKEHELL	ICA1	Q05084	MAD	3	78.4	FALSE
HTP0090B	Plasma	SciLifeLab peptide array	ICA1_HPRR4160047	HESFKGYQPYEFTTLKSLQDPMKKLVEKEEKKKINQQESTDAAVQEPSQLISLEEENQRKESSSFK	ICA1	Q05084	MAD	1	38.8	FALSE
HTP0090B	Plasma	SciLifeLab peptide array	IFIH1_HPRR330271	GWTREFVEALRRTGSPLAARYMNPELTDLPSPSFENAHDEYLQLLNLLQPTLVDKLLVRDVLDKCMEEELLTIEDRNRIAAAENNGNESGVRELLKRIVQKENWFSAFLNVLRQTGNNELVQELTGSDCSESNAEIENLSQVDGPQVEEQ	IFIH1	Q9BYX4	MAD	2	4.1	FALSE
HTP0090B	Plasma	SciLifeLab peptide array	IFNA21*_HPRR3360011	MNADSILAVKKYFRRITLYLTEKKYSPCA	IFNA21*	P01568;P05014;P01567;P01566;P05015;P01571;P01570;P01569;P05013;P01562;P01563;P32881	MAD	0	1	FALSE
HTP0090B	Plasma	SciLifeLab peptide array	IFNA21*_HPRR3360040	AEAISVLHEVIQQTFNLFSTKDSSVA	IFNA21*	P01568;P05014;P01567;P01566;P05015;P01571;P01570;P01569;P05013;P01562;P01563;P32881	MAD	0	-1	TRUE
HTP0090B	Plasma	SciLifeLab peptide array	IFNB1_HPRR2760323	ETIVENLLANVYHQINHLKTVLEEKLEKEDFTRGKLMSSLHLKRYYGRILHYLKAKEYSHCAWTIVRVEILRNFYFINR	IFNB1	P01574	MAD	1	1	FALSE
HTP0090B	Plasma	SciLifeLab peptide array	IFNB1_HPRR2760324	YNLLGFLQRSSNFQCQKLLWQLNGRLEYCLKDRMNFDIPEEIKQLQQFQKEDAALTIYEMLQNIFAIFRQDSSSTGWN	IFNB1	P01574	MAD	0	2	FALSE
HTP0090B	Plasma	SciLifeLab peptide array	IFNL1_HPRR3790181	PVPTSKPTTTGKGCHIGRFKSLSP	IFNL1	Q8IU54	MAD	0	1.2	FALSE
HTP0090B	Plasma	SciLifeLab peptide array	IFNL3*_HPRR3260137	AVPVARLRGALPDARGCHIAQFKSLSPQE	IFNL3*	Q8IZI9;Q8IZJ0	MAD	-2	-0.9	FALSE
HTP0090B	Plasma	SciLifeLab peptide array	IFNW1*_HPRR3360041	MLLAQMRRISLFSCLKDRHDFRFPQE	IFNW1*	P05000;P01568;P05014;P01567;P01566;P05015;P01571;P01570;P01569;P05013;P01562;P01563;P32881	MAD	-2	2	FALSE
HTP0090B	Plasma	SciLifeLab peptide array	IFNW1_HPRR3780122	AWNMTLLDQLHTGLHQQLQHLETCLLQVVGEGESAGAISSPALTLRRYFQGIRVYLKEK	IFNW1	P05000	MAD	-1	0	FALSE
HTP0090B	Plasma	SciLifeLab peptide array	IL17A_HPRR2760112	NPGCPNSEDKNFPRTVMVNLNIHNRNTNTNPKRSSDYYNRSTSPWNLHRNEDPERYPSVIWEAKCRHLGCIN	IL17A	Q16552	MAD	1	1	FALSE
HTP0090B	Plasma	SciLifeLab peptide array	IL17A_HPRR4290151	EILVLRREPPHCPNSFRLEKILVS	IL17A	Q16552	MAD	-1	0	FALSE
HTP0090B	Plasma	SciLifeLab peptide array	IL17F_HPRR2570223	RKIPKVGHTFFQKPESCPPVPGGSMKLDIGIINENQRVSMSRNIESRSTSPWNYTVTWDPNRYPSEVVQAQCRNLGCINAQGKE	IL17F	Q96PD4	MAD	-1	23.4	FALSE
HTP0090B	Plasma	SciLifeLab peptide array	IL17F_HPRR4110234	QQETLVVRRKHQGCSVSFQLEKVLVTV	IL17F	Q96PD4	MAD	0	0	FALSE
HTP0090B	Plasma	SciLifeLab peptide array	IL22_HPRR1060056	PISSHCRLDKSNFQQPYITNRTFMLAKEASLADNNTDVRLIGEKLFHGVSMSERCYLMKQVLNFTLEEVLFPQSDRFQPYMQEVVPFLARLSNRLSTCHIEGDDLHIQRNVQKLKDTVKKLGESGEIKAIGELDLLFMSLRNA	IL22	Q9GZX6	MAD	1	2	FALSE
HTP0090B	Plasma	SciLifeLab peptide array	INS_HPRR380034	SHLVEALYLVCGERGFFYTPKTRREAEDLQVGQVELGGGPGAGSLQPLALEGSLQKRGIVEQCCTSICSLYQLENYC	INS	P01308	MAD	-1	2	FALSE
HTP0090B	Plasma	SciLifeLab peptide array	INSM2_HPRR3450147	KHLSTHEAGSARALAPGFGSERGAPLAFACPLCGAHFPTADIREKHRLWHAVREELLLPALAGAPPETSGPSGPSDGSAQQIFSCKHCPSTF	INSM2	Q96T92	MAD	36	53.4	FALSE
HTP0090B	Plasma	SciLifeLab peptide array	INSM2_HPRR3450148	AEGKENSRIERTADQHPQARDSSGADQHPDSAPRQGLQVLTHPEPPLPQGPYTEGVLGRRVPVPGSTSGGRGSEIFVCP	INSM2	Q96T92	MAD	-2	2	FALSE
HTP0090B	Plasma	SciLifeLab peptide array	KCND1_HPRR230897	SSQPVGPGSLLSSCCPRRAKRRAIRLANSTASVSRGSMQELDMLAGLRRSHAPQSRSSLNAKPHDSLDLNCDSRDFVAAIISIPTPPANTPDESQPSSPGGGGRAGSTLRNSSLGT	KCND1	Q9NSA2	MAD	0	1.1	FALSE
HTP0090B	Plasma	SciLifeLab peptide array	KCND1_HPRR230898	NTLDRYPDTLLGSSEKEFFYDADSGEYFFDRDPDMFRHVLNFYRTGRLHCPRQECIQAFDEELAFYGLVPELVGDCCLEEYRDRKKENAERLAEDEEAEQ	KCND1	Q9NSA2	MAD	4	8.1	FALSE
HTP0090B	Plasma	SciLifeLab peptide array	KCND1_HPRR4320417	KTTCHEFTDELTFSEALGAVSPGGRTSRSTSVSSQPVGPGSLLSSCCPRRAKRRAIRLANSTASVSRGSM	KCND1	Q9NSA2	MAD	0	1	FALSE
HTP0090B	Plasma	SciLifeLab peptide array	KCNJ10_HPRR4030424	EFTPAISLSASGKYIADFSLFDQVVKVASPSGLRDSTVRYGDPEKLKLEESLREQAEKEGSALSVRISNV	KCNJ10	P78508	MAD	0	4	FALSE
HTP0090B	Plasma	SciLifeLab peptide array	KCNJ10_HPRR4030425	MTSVAKVYYSQTTQTESRPLMGPGIRRRRVLTKDGRSNVRMEHIADKRFLYLKDLWTTFIDMQWRY	KCNJ10	P78508	MAD	19	10.9	TRUE
HTP0090B	Plasma	SciLifeLab peptide array	KCNJ10_HPRR4030426	VAVAHGDLLELDPPANHTPCVVQVHTLTG	KCNJ10	P78508	MAD	0	1.1	FALSE
HTP0090B	Plasma	SciLifeLab peptide array	KCNJ11_HPRR3690159	TVKVPTPLCTARQLDEDHSLLEALTLASARGPLRKRSVPMAKAKPKFSISPDSLS	KCNJ11	Q14654	MAD	-2	0.1	FALSE
HTP0090B	Plasma	SciLifeLab peptide array	KCNJ11_HPRR4080108	YVLTRLAEDPAKPRYRARQRRARFVSKKGNCNVAH	KCNJ11	Q14654	MAD	-3	0	FALSE
HTP0090B	Plasma	SciLifeLab peptide array	KCNJ11_HPRR650098	RLCFMLRVGDLRKSMIISATIHMQVVRKTTSPEGEVVPLHQVDIPMENGVGGNSIFLVAPLIIYHVIDANSPLYDLAPSDLHHHQDLEIIVILEGVVETTGIT	KCNJ11	Q14654	MAD	0	0	FALSE
HTP0090B	Plasma	SciLifeLab peptide array	KEL_HPRR1952469	PRPCETSVCLDLRDHYLASGNTSVAPCTDFFSFACGRAKETNNSFQELATKNKNRLRRILEVQNSWHPGSGEEKAFQFYNSCMDTLAIEAAGTGPLRQVIEELGGWRISGKWT	KEL	P23276	MAD	1	1	FALSE
HTP0090B	Plasma	SciLifeLab peptide array	KEL_HPRR1952470	DQLKEMAPAIDWLSCLQATFTPMSLSPSQSLVVHDVEYLKNMSQLVEEMLLKQRDFLQSHMILGLVVTLSPALDSQFQEARRKLSQKLRELTEQPPMPARPRWMKCVEETGTFFEPTLAALFVREAFGPSTRSAAMKL	KEL	P23276	MAD	0	2	FALSE
HTP0090B	Plasma	SciLifeLab peptide array	LAD1_HPRR1350086	SPRTISFRMKPKKENSETTLTRSASMKLPDNTVKLGEKLERYHTAIRRSESVKSRGLPCTELFVAPVGVASKRHLFEKELAGQSRAEPASSRKENLRLSGVVTSRLNLWISRTQESGDQDPQEAQKASSATERTQWGQKSDSSL	LAD1	O00515	MAD	-1	1.1	FALSE
HTP0090B	Plasma	SciLifeLab peptide array	LAMP2_HPRR232315	LELNLTDSENATCLYAKWQMNFTVRYETTNKTYKTVTISDHGTVTYNGSICGDDQNGPKIAVQFGPGFSWIANFTKAASTYSIDSVSFSYNTGDNTTFPDAEDKGILTVDELLAIRIPLNDLFRCNSLSTLEKNDVVQHYWDVLVQA	LAMP2	P13473	MAD	2	0.1	TRUE
HTP0090B	Plasma	SciLifeLab peptide array	LAMP2_HPRR232316	GTVSTNEFLCDKDKTSTVAPTIHTTVPSPTTTPTPKEKPEAGTYSVNNGNDTCLLATMGLQLNITQDKVASVININPNTTHSTGSCRSHTALLRLNSSTIKYLDFVFAVKNENRFYLKEVNISMYLVNGSVFSIANNNLSY	LAMP2	P13473	MAD	-2	-0.8	FALSE
HTP0090B	Plasma	SciLifeLab peptide array	LAMP2_HPRR2810012	ASTYSIDSVSFSYNTGDNTTFPDAEDKGILTVDELLAIRIPLNDLFRCNSLSTLEKNDVVQHYWDVLV	LAMP2	P13473	MAD	4	6.1	FALSE
HTP0090B	Plasma	SciLifeLab peptide array	LAMP2_HPRR2810014	LGSSYMCNKEQTVSVSGAFQINTFDLRVQPFNVTQGKYSTAQDCSADDDNF	LAMP2	P13473	MAD	-1	-1	FALSE
HTP0090B	Plasma	SciLifeLab peptide array	LBR_HPRR3410125	MPSRKFADGEVVRGRWPGSSLYYEVEILSHDSTSQLYTVKYKDGTELELKENDIKPLTSFRQRKGGSTSSS	LBR	Q14739	MAD	0	1	FALSE
HTP0090B	Plasma	SciLifeLab peptide array	LBR_HPRR3410127	EARREVEVKLTPLILKPFGNSISRYNGEPEHIERNDAPHKNTQEKFNLSQESSYIATQYSLRPRREEVKLKEIDSKEEKYVAKELAVRTF	LBR	Q14739	MAD	0	23.1	FALSE
HTP0090B	Plasma	SciLifeLab peptide array	LRP4_HPRR1770061	IQRVDKYSGRNKETVLANVEGLMDIIVVSPQRQTGTNACGVNNGGCTHLCFARASDFVCACPDEPDSQPCSLVPGLVPPAPRATGMSEKSPVLPNTPPTTLYSSTTRTRTSLEEVEGRCSERDARLGLCARSNDAVPAAP	LRP4	O75096	MAD	3	15.1	FALSE
HTP0090B	Plasma	SciLifeLab peptide array	LRP4_HPRR1770062	PGMGNLTYSNPSYRTSTQEVKIEAIPKPAMYNQLCYKKEGGPDHNYTKEKIKIVEGICLLSGDDAEWDDLKQLRSSRGGLLRDHVCMKTDTVSIQASSGSLDDTETEQLLQEEQSECSSVH	LRP4	O75096	MAD	108	3.3	TRUE
HTP0090B	Plasma	SciLifeLab peptide array	MARS_HPRR430074	FVLQDTVEQLRCEHCARFLADRFVEGVCPFCGYEEARGDQCDKCGKLINAVELKKPQCKVCRSCPVVQSSQHLFLDLPKLEKRLEEWLGRTLPGSDWTPNAQFITRSWLRDGLKPRCITRDLKWGTPVPLEGFEDKVFYVWFD	MARS	P56192	MAD	4	4	FALSE
HTP0090B	Plasma	SciLifeLab peptide array	MBP_HPRR2850726	ASTNSETNRGESEKKRNLGELSRTTSEDNEVFGEADANQNNGTSSQDTAVTDSKRTADPKNAWQDAHPADPGSRPHLIRLFSRDAP	MBP	P02686	MAD	1	33.3	FALSE
HTP0090B	Plasma	SciLifeLab peptide array	MBP_HPRR2850727	DENPVVHFFKNIVTPRTPPPSQGKGRGLSLSRFSWGAEGQRPGFGYGGRASDYKSAHKGFKGVDAQGTLSKIFKLGGRDSRSGSPM	MBP	P02686	MAD	0	0	FALSE
HTP0090B	Plasma	SciLifeLab peptide array	MORC3_HPRR2280025	NNPDPQFRNCEVPEEPEDEDLVHPTYEKTYKKTNKEKFRIRQPEMIPRINAELLFRPTALSTPSFSSPKESVPRRHLSEGTNSYATRLLNNHQVPPQSEPESNSLKRR	MORC3	Q14149	MAD	1	4	FALSE
HTP0090B	Plasma	SciLifeLab peptide array	MORC3_HPRR2890077	GKKGTRIIIWNLRSYKNATEFDFEKDKYDIRIPEDLDEITGKKGYKKQERMDQIAPESDYSLRAYCSILYLKPRMQIILR	MORC3	Q14149	MAD	-1	2	FALSE
HTP0090B	Plasma	SciLifeLab peptide array	MPO_HPRR280052	SRDHGLPGYNAWRRFCGLPQPETVGQLGTVLRNLKLARKLMEQYGTPNNIDIWMGGVSEPLKRKGRVGPLLACIIGTQFRKLRDGDRFWWENEGVFSMQQRQALAQISLPRIICDNTGITTVSKNNIFMSNSYPRDFVNC	MPO	P05164	MAD	1	1	FALSE
HTP0090B	Plasma	SciLifeLab peptide array	MPO_HPRR4160030	GAAPAVLGEVDTSLVLSSMEEAKQLVDKAYKERRESIKQRLR	MPO	P05164	MAD	0	5.2	FALSE
HTP0090B	Plasma	SciLifeLab peptide array	MUSK_HPRR2750111	YYGMAHEEVIYYVRDGNILSCPENCPVELYNLMRLCWSKLPADRPSFTSIHRILERMCERAEGTVSV	MUSK	O15146	MAD	1	2	FALSE
HTP0090B	Plasma	SciLifeLab peptide array	MUSK_HPRR2750113	PKAPVITTPLETVDALVEEVATFMCAVESYPQPEISWTRNKILIKLFDTRYSIRENGQLLTILSVEDSDDGIYCCTANNGVGGAVESCGALQVKMKPKITR	MUSK	O15146	MAD	-2	1	FALSE
HTP0090B	Plasma	SciLifeLab peptide array	MUSK_HPRR290005	RGEVCNAVLAKDALVFLNTSYADPEEAQELLVHTAWNELKVVSPVCRPAAEALLCNHIFQECSPGVVPTPIPICREYCLAVKELFCAKEWLVMEEKTHRGLYRSEMHLLSVPECSKLPSMHWDPTACARLPHLAFPPMTSSK	MUSK	O15146	MAD	-4	-1	FALSE
HTP0090B	Plasma	SciLifeLab peptide array	MUSK_HPRR4160302	RESAAVTLTTLPSELLLDRLHPNPMYQRMPLLLNPKLLSLEYPRNNIEYVRDIGEGAFGRVFQARAPGLLP	MUSK	O15146	MAD	1	2	FALSE
HTP0090B	Plasma	SciLifeLab peptide array	MUSK_HPRR4160303	RIHNVQKEDAGQYRCVAKNSLGTAYSKVVKLEVEVFARILRAPESHNVTFGSFVTLHCTATGIPVPTITWIENGNA	MUSK	O15146	MAD	0	3.1	FALSE
HTP0090B	Plasma	SciLifeLab peptide array	MYH10_HPRR3460173	RQLDDATEANEGLSREVSTLKNRLRRGGPISFSSSRSGRRQLHLEGASLELSDDDTESKTSDVNETQPPQ	MYH10	P35580	MAD	-2	6.1	FALSE
HTP0090B	Plasma	SciLifeLab peptide array	MYH10_HPRR3890677	VQELHAKVSEGDRLRVELAEKASKLQNELDNVSTLLEEAEKKGIKFAKDA	MYH10	P35580	MAD	105	63.6	TRUE
HTP0090B	Plasma	SciLifeLab peptide array	MYH11_HPRR1720012	VTVLKKALDEETRSHEAQVQEMRQKHAQAVEELTEQLEQFKRAKANLDKNKQTLEKENADLAGELRVLGQAKQEVEHKKKKLEAQVQELQSKCSDGE	MYH11	P35749	MAD	-1	3	FALSE
HTP0090B	Plasma	SciLifeLab peptide array	MYH11_HPRR1720013	LQEETRQKLNVSTKLRQLEEERNSLQDQLDEEMEAKQNLERHISTLNIQLSDSKKKLQDFASTVEALEEGKKRFQKEIENLTQQYEEK	MYH11	P35749	MAD	3	12	FALSE
HTP0090B	Plasma	SciLifeLab peptide array	MYH13_HPRR4080014	DNKEMYVKGMIQTRENDKVIVKTLDDRMLTLNNDQVFPMN	MYH13	Q9UKX3	MAD	2	48.5	FALSE
HTP0090B	Plasma	SciLifeLab peptide array	MYH14_HPRR3830109	GAGEQLKADLLLEPCSHYRFLTNGPSSSPGQERELFQETLESLRVLGFSHEE	MYH14	Q7Z406	MAD	0	4.1	FALSE
HTP0090B	Plasma	SciLifeLab peptide array	MYH14_HPRR4290008	FTTRTVRQVFRLEEGVASDEEAEEAQPGSGPSPEPEGSPP	MYH14	Q7Z406	MAD	0	0	FALSE
HTP0090B	Plasma	SciLifeLab peptide array	MYH15_HPRR2960342	KMERERADLTQDLADLNERLEEVGGSSLAQLEITKKQETKFQKLHRDMEEATLHFETTSASLKKRH	MYH15	Q9Y2K3	MAD	0	5	FALSE
HTP0090B	Plasma	SciLifeLab peptide array	MYH15_HPRR2960343	LGEAAAFLRRSEAELLLLQATALDGKKKCWIPDGENAYIEAEVKGSEDDGTVIVETADGESLSIKEDKIQQMNPPEFE	MYH15	Q9Y2K3	MAD	-2	1.2	FALSE
HTP0090B	Plasma	SciLifeLab peptide array	MYH3_HPRR2500234	IEAQNQPFDAKTYCFVVDSKEEYAKGKIKSSQDGKVTVETEDNRTLVVKPEDVYAMNPPKFDRIEDMAML	MYH3	P11055	MAD	1	6.2	FALSE
HTP0090B	Plasma	SciLifeLab peptide array	MYH6*_HPRR141341	QVEEDKVNSLSKSKVKLEQQVDDLEGSLEQEKKVRMDLERAKRKLEGDLKLTQESIMDLENDKLQLEEKLKKKEFDINQQNSKIEDEQVLALQLQKKLKENQARIEELEEELEAERTARAKVEKLRSDLSRELEEISERLEEA	MYH6*	P13533;P12883;P13535;Q9Y623;P12882;Q9UKX2	MAD	10	10.3	FALSE
HTP0090B	Plasma	SciLifeLab peptide array	MYH6*_HPRR141342	ALRKKHADSVAELGEQIDNLQRVKQKLEKEKSEFKLELDDVTSNMEQIIKAKANLEKMCRTLEDQMNEHRSKAEETQRSVNDLTSQRAKLQTENGELSRQLDEKEALISQLTRGKLTYTQQLEDLKRQLEEEVKAKNALAHALQS	MYH6*	P13533;P12883	MAD	0	9.1	FALSE
HTP0090B	Plasma	SciLifeLab peptide array	MYH6*_HPRR4370083	LDKKQRNFDKILAEWKQKCEETHAELEA	MYH6*	P13533;P12883;Q9UKX3;P13535;Q9Y623;P12882;Q9UKX2;P11055	MAD	2	2	FALSE
HTP0090B	Plasma	SciLifeLab peptide array	MYH7B_HPRR3300035	KVHTIPWDGKKRVWVPDEQDAYVEAEVKSEATGGRVTVETKDQKVLMVREAELQPMNPPRFDLLEDMAMM	MYH7B	A7E2Y1	MAD	-1	18.3	FALSE
HTP0090B	Plasma	SciLifeLab peptide array	MYH7B_HPRR3300036	DMSGNKRGSRASCPHRGAECLLPWAALNLQGFQLLLLHPSATAMMDVSELGESARYLRQGYQEMTK	MYH7B	A7E2Y1	MAD	0	1	FALSE
HTP0090B	Plasma	SciLifeLab peptide array	MYH9_HPRR350143	REQEVNILKKTLEEEAKTHEAQIQEMRQKHSQAVEELAEQLEQTKRVKANLEKAKQTLENERGELANEVKVLLQGKGDSEHKRKKVEAQLQELQVKFNEGERVRTELADKVTKLQVELDNVTGLLSQSDSKSSKLTKDF	MYH9	P35579	MAD	0	2.1	FALSE
HTP0090B	Plasma	SciLifeLab peptide array	NARS_HPRR3120288	RLEDLVCDVVDRILKSPAGSIVHELNPNFQPPKRPFKRMNYSDAIVWLKEHDVKKEDGTFYEFGEDIPEAPERLMTDTINEPILLCRFPVEIK	NARS	O43776	MAD	-2	3.1	FALSE
HTP0090B	Plasma	SciLifeLab peptide array	NARS_HPRR3120291	GALEGYRGQRVKVFGWVHRLRRQGKNLMFLVLRDGTGYLQCVLADELCQCYNGVLLSTESSVAVYGMLNLTPKGKQAPGGHELSCDFWELIG	NARS	O43776	MAD	-1	3	FALSE
HTP0090B	Plasma	SciLifeLab peptide array	NARS2_HPRR370132	LAEFYMIEAEISFVDSLQDLMQVIEELFKATTMMVLSKCPEDVELCHKFIAPGQKDRLEHMLKNNFLIISYTEAVEILKQASQNFTFTPEWGADLRTEHEKYLVKHCGNIPVFVINYPLTLKPFYMRDNEDGPQHTVAAVDLLVPGVG	NARS2	Q96I59	MAD	-2	-1	FALSE
HTP0090B	Plasma	SciLifeLab peptide array	NCOA2_HPRR3760125	SPRMAHTQSPMMQQSQANPAYQAPSDINGWAQGNMGGNSMFSQQSPPHFGQQANTSMYSNNMNINVSMATNTGGMSSMNQMTGQISMTSVT	NCOA2	Q15596	MAD	1	1.1	FALSE
HTP0090B	Plasma	SciLifeLab peptide array	NCOA2_HPRR3760127	PKLERLDSKTDPASNTKLIAMKTEKEEMSFEPGDQPGSELDNLEEILDDLQNSQLPQLFPDTRPGAPAGSV	NCOA2	Q15596	MAD	-1	38.4	FALSE
HTP0090B	Plasma	SciLifeLab peptide array	NKX6-1_HPRR3060095	PLGTHNPGGLKPPATGGLSSLGSPPQQLSAATPHGINDILSRPSM	NKX6-1	P78426	MAD	1	2	FALSE
HTP0090B	Plasma	SciLifeLab peptide array	NLRP5_HPRR3280206	LLPESFLIVTVRDVGTEKLKSEVVSPRYLLVRGISGEQRIHLLLERGIGEHQKTQGLRAIMNNRELLDQCQVPAVGSLICVALQLQDVVGESVAPFNQTLTGLHAAFVFHQLTPR	NLRP5	P59047	MAD	0	0	FALSE
HTP0090B	Plasma	SciLifeLab peptide array	NUP210_HPRR2110161	DLIHDIQIVSTTRELYLEDSPLELKIQALDSEGNTFSTLAGLVFEWTIVKDSEADRFSDSHNALRILTFLESTYIPPSYISEMEKAAKQGDTILVSGMKTGSSKLKARIQEAVYKNVRPAEVRLLILENILLNPAYDVYLMVGTSIHYK	NUP210	Q8TEM1	MAD	0	2.1	FALSE
HTP0090B	Plasma	SciLifeLab peptide array	NUP210_HPRR2110162	TFTVHFHDNSGDVFHAHSSVLNFATNRDDFVQIGKGPTNNTCVVRTVSVGLTLLRVWDAEHPGLSDFMPLPVLQAISPELSGAMVVGDVLCLATVLTSLEGLSGTWSSSANSILHIDPKTGVAV	NUP210	Q8TEM1	MAD	-1	-1	FALSE
HTP0090B	Plasma	SciLifeLab peptide array	NUP210_HPRR3890586	HLHPIQTSFQEATASKVIVAVGDRSSNLRGECTPTQREVIQALHPETLISCQSQFKPAVFDFPSQDVFTVEPQFDTALGQYFCSITMHRLTDKQRKHL	NUP210	Q8TEM1	MAD	-1	5.1	FALSE
HTP0090B	Plasma	SciLifeLab peptide array	NUP62_HPRR1430027	GGFTFGTAKTATTTPATGFSFSTSGTGGFNFGAPFQPATSTPSTGLFSLATQTPATQTTGFTFGTATLASGGTGFSLGIGASKLNLSNTAATPAMANPSGFGLGSSNLTNAISSTVTSSQGTAPTGFVFGPST	NUP62	P37198	MAD	2	2	FALSE
HTP0090B	Plasma	SciLifeLab peptide array	OGDH_HPRR2440198	LRTCAAKLRPLTASQTVKTFSQNRPAAARTFQQIRCYSAPVAAEPFLSGTSSNYVEEMYCAWLENPKSV	OGDH	Q02218	MAD	-1	0.1	FALSE
HTP0090B	Plasma	SciLifeLab peptide array	OGDH_HPRR2440199	FRNTNAGAPPGTAYQSPLPLSRGSLAAVAHAQSLVEAQPNVDKLVEDHLAVQSLIRAYQIRGHHVAQ	OGDH	Q02218	MAD	-1	1	FALSE
HTP0090B	Plasma	SciLifeLab peptide array	PAGE2B*_HPRR3340273	QGIAPSGEIENEGAPAVQGPDMEAFQQELALLKIEDEPGDGPDVREGIMPTFDLTKVLEAGDA	PAGE2B*	Q5JRK9;Q7Z2X7;Q96GU1	MAD	-1	6.3	FALSE
HTP0090B	Plasma	SciLifeLab peptide array	PAGE2B*_HPRR3340274	RSQSSERGNDQESSQPVGSVIVQEPTEEKRQEEEPPTDN	PAGE2B*	Q5JRK9;Q7Z2X7;Q96GU1	MAD	0	14.1	FALSE
HTP0090B	Plasma	SciLifeLab peptide array	PAGE5_HPRR3920178	PWAGNRGWAGTREEVRDMSEHVTRSQS	PAGE5	Q96GU1	MAD	2	12.3	FALSE
HTP0090B	Plasma	SciLifeLab peptide array	PDHA1*_HPRR3340143	NDATFEIKKCDLYLLEEGPPVTTVLTR	PDHA1*	P08559;P29803	MAD	0	2	FALSE
HTP0090B	Plasma	SciLifeLab peptide array	PDHA1*_HPRR3340144	ILAELTGRRGGCAKGKGGSMHMYTKNFYGGNGIVG	PDHA1*	P08559;P29803	MAD	1	1	FALSE
HTP0090B	Plasma	SciLifeLab peptide array	PDHA1*_HPRR3340146	YCRSGKGPILMELQTYRYHGHSMSDPGVS	PDHA1*	P08559;P29803	MAD	0	0	FALSE
HTP0090B	Plasma	SciLifeLab peptide array	PDHX_HPRR3050163	PAARNILEKHSLDASQGTATGPRGIFTKEDALKLVQLKQTGKITESRPTPAPTATPTAPSPLQATAGPSYPRPVIPPVSTPGQPNAVGTFTEI	PDHX	O00330	MAD	-2	0	FALSE
HTP0090B	Plasma	SciLifeLab peptide array	PDHX_HPRR3050164	DASDDGILAKIVVEEGSKNIRLGSLIGLIVEEGEDWKHVEIPKDVGPPPPVSKPSEPRPSPEPQISIPVKKEHIPGTLRFRLS	PDHX	O00330	MAD	1	22.4	FALSE
HTP0090B	Plasma	SciLifeLab peptide array	PDX1_HPRR3930003	DISPYEVPPLADDPAVAHLHHHLPAQLALPHPPAGPFPEGAEPGVLEEPNRVQLPFPWMKSTKA	PDX1	P52945	MAD	3	30.2	FALSE
HTP0090B	Plasma	SciLifeLab peptide array	PLP1_HPRR4180637	IYFNTWTTCQSIAFPSKTSASIGSLCADARMYGVLPWNAFPGK	PLP1	P60201	MAD	-2	0	FALSE
HTP0090B	Plasma	SciLifeLab peptide array	PPY_HPRR2500214	EPVYPGDNATPEQMAQYAADLRRYINMLTRPRYGKRHKEDTLAFSEWGSPHAAVPRELSPLDL	PPY	P01298	MAD	2	2	FALSE
HTP0090B	Plasma	SciLifeLab peptide array	PROC_HPRR330193	DQCLVLPLEHPCASLCCGHGTCIDGIGSFSCDCRSGWEGRFCQREVSFLNCSLDNGGCTHYCLEEVGWRRCSCAPGYKLGDDLLQCHPAVKFPCGRPWKRMEKKRSHLKRDTEDQEDQVDPRLIDGKMTRRGDSPWQVVLLD	PROC	P04070	MAD	0	2	FALSE
HTP0090B	Plasma	SciLifeLab peptide array	PROC_HPRR330194	AHCMDESKKLLVRLGEYDLRRWEKWELDLDIKEVFVHPNYSKSTTDNDIALLHLAQPATLSQTIVPICLPDSGLAERELNQAGQETLVTGWGYHSSREKEAKRNRTFVLNFIKIPVVPHNECSEVMSNMVSENMLCAGI	PROC	P04070	MAD	0	4	FALSE
HTP0090B	Plasma	SciLifeLab peptide array	PRPH_HPRR3070455	FSSTSYRRTFGPPPSLSPGAFSYSSSSRFSSSRLLGSASPSSSVRLGSFRSPRAGAGALLRLPSERLDFSMAEALNQEFLATRSNEKQEL	PRPH	P41219	MAD	-1	0	FALSE
HTP0090B	Plasma	SciLifeLab peptide array	PRPH_HPRR3890753	EESRISVPVHSFASLNIKTTVPEVEPPQDSHSRKTVLIKTI	PRPH	P41219	MAD	-1	179.2	FALSE
HTP0090B	Plasma	SciLifeLab peptide array	PRTN3_HPRR400125	PTQQHFSVAQVFLNNYDAENKLNDILLIQLSSPANLSASVATVQLPQQDQPVPHGTQCLAMGWGRVGAHDPPAQVLQELNVTVVTFFCRPHNICTFVPRRKAGICFGDSGGPLICDGI	PRTN3	P24158	MAD	3	3	FALSE
HTP0090B	Plasma	SciLifeLab peptide array	PSMA3_HPRR4320279	TGYDLSASTFSPDGRVFQVEYAMKAVENSSTAIGIRCKDGVVFGVEKLVLSKLYEEGSNKRLFNVDRHVGMAVAGLLADAR	PSMA3	P25788	MAD	1	1	FALSE
HTP0090B	Plasma	SciLifeLab peptide array	PTGER3_HPRR1960004	MKETRGYGGDAPFCTRLNHSYTGMWAPERSAEARGNLTRPPGSGEDCGSVS	PTGER3	P43115	MAD	-1	2	FALSE
HTP0090B	Plasma	SciLifeLab peptide array	PTGER3_HPRR4160226	RKILLRKFCQIRYHTNNYASSSTSLPCQCSSTLMWSDHLER	PTGER3	P43115	MAD	0	2	FALSE
HTP0090B	Plasma	SciLifeLab peptide array	PTGS1_HPRR330080	MPDSFKVGSQEYSYEQFLFNTSMLVDYGVEALVDAFSRQIAGRIGGGRNMDHHILHVAVDVIRESREMRLQPFNEYRKRFGMKPYTSFQELVGEKEMAAELEELYGDIDALEFYPGLLLEKCHPNSIFGESMIEIGAPFSLKGLLGN	PTGS1	P23219	MAD	3	6	FALSE
HTP0090B	Plasma	SciLifeLab peptide array	PTPRN_HPRR1350005	VSSEPPKAARPPVTPVLLEKKSPLGQSQPTVAGQPSARPAAEEYGYIVTDQNVVGPALTFRIRHNEQNLSLADVTQQAGLVKSELEAQTGLQILQTGVGQREEAAAVLPQTAHSTSPM	PTPRN	Q16849	MAD	-2	1.1	FALSE
HTP0090B	Plasma	SciLifeLab peptide array	PTPRN_HPRR4160144	QVTSPVLQRLQGVLRQLMSQGLSWHDDLTQYVISQEMERIPRLRPPEPRPRDRSGLAPKRPGPAGELLLQDIPTGSAPAAQHRL	PTPRN	Q16849	MAD	0	2	FALSE
HTP0090B	Plasma	SciLifeLab peptide array	PTPRN2_HPRR1350080	QDDDDRLYQEVHRLSATLGGLLQDHGSRLLPGALPFARPLDMERKKSEHPESSLSSEEETAGVENVKSQTYSKDLLGQQPHSEPGAAAFGELQNQMPGPSKEEQSLPAGAQ	PTPRN2	Q92932	MAD	12	3.1	TRUE
HTP0090B	Plasma	SciLifeLab peptide array	PTPRN2_HPRR1350081	RFSESILTYVAHTSALTYPPGSRTQLREDLLPRTLGQLQPDELSPKVDSGVDRHHLMAALSAYAAQRPPAPPGEGSLEPQYLLRAPSRMPRPLLAPAAPQKWPSPLGDSEDPSST	PTPRN2	Q92932	MAD	26	11.1	TRUE
HTP0090B	Plasma	SciLifeLab peptide array	RAB3D*_HPRR4320449	AVQDWATQIKTYSWDNAQVILVGNKCD	RAB3D*	O95716;P20336;P20337;Q96E17	MAD	0	1	FALSE
HTP0090B	Plasma	SciLifeLab peptide array	RAB3D_HPRR2260029	EASAKENINVKQVFERLVDVICEKMNESLEPSSSSGSNGKGPAVGDAPAPQPSSCSC	RAB3D	O95716	MAD	4	33	FALSE
HTP0090B	Plasma	SciLifeLab peptide array	RAPSN_HPRR3050586	TKVLEKSSDLMGRFRVLGCLVTAHSEMGRYKEMLKFAVVQIDTARELEDADFLLESYLNLARSNEKLCEFHKTISYCKTC	RAPSN	Q13702	MAD	1	2	FALSE
HTP0090B	Plasma	SciLifeLab peptide array	RAPSN_HPRR3050587	SLSMGNAFLGLSVFQKALESFEKALRYAHNNDDAMLECRVCCSLGSFYAQVKDYEKALFFPCKAAELVNNYGKGWSLKYRAMS	RAPSN	Q13702	MAD	-1	0	FALSE
HTP0090B	Plasma	SciLifeLab peptide array	RAPSN_HPRR3050588	MECCEESMKIALQHGDRPLQALCLLCFADIHRSRGDLETAFPRYDSAMSIMTEIGNRLGQVQALLGVAKCWVARKALDKALDAIE	RAPSN	Q13702	MAD	0	1	FALSE
HTP0090B	Plasma	SciLifeLab peptide array	RARS_HPRR620009	VVLGEDKKKFKTRSGETVRLMDLLGEGLKRSMDKLKEKERDKVLTAEELNAAQTSVAYGCIKYADLSHNRLNDYIFSFDKMLDDRGNTAAYLLYAFTRIRSIARLANIDEEMLQKAARETKILLDHEKEWKLGRCILRFPEI	RARS	P54136	MAD	2	2	FALSE
HTP0090B	Plasma	SciLifeLab peptide array	REG1B*_HPRR3320001	TDDFNVWIGLHDPKKNRRWHWSSGSLVSYKSWG	REG1B*	P48304;P05451	MAD	-1	3.1	FALSE
HTP0090B	Plasma	SciLifeLab peptide array	REG1B*_HPRR3320002	PEGTNAYRSYCYYFNEDRETWVDADLYCQNMNSGNLVSV	REG1B*	P48304;P05451	MAD	0	13.8	FALSE
HTP0090B	Plasma	SciLifeLab peptide array	RHD*_HPRR3980079	LNLKIWKAPHVAKYFDDQVFWKFPHLAVGF	RHD*	Q02161;P18577	MAD	1	2	FALSE
HTP0090B	Plasma	SciLifeLab peptide array	RHD*_HPRR4080111	AILLDGFLSQFPSGKVVITLFSIRL	RHD*	Q02161;P18577	MAD	2	2	FALSE
HTP0090B	Plasma	SciLifeLab peptide array	RHD_HPRR2870121	VGFSKSIQEKQGLFKNKTTSSHCCLHLYVRNAHDSKVSNVRAGTGVRENGVESFLCHSLRRISPFIMHC	RHD	Q02161	MAD	1	1.1	FALSE
HTP0090B	Plasma	SciLifeLab peptide array	RPL6_HPRR3720353	VPRKLLSHGKKPFSQHVRKLRASITPGTILIILTGRHRGKRVVFLKQLASGLLL	RPL6	Q02878	MAD	-2	-1	FALSE
HTP0090B	Plasma	SciLifeLab peptide array	RPL6_HPRR580003	LRASITPGTILIILTGRHRGKRVVFLKQLASGLLLVTGPLVLNRVPLRRTHQKFVIATSTKIDISNVKIPKHLTDAYFKKKKLRKPRHQEGEIFDTEKEKYEITEQRKIDQKAVDSQILPKIKAIPQLQGYLRSVFALTNGIYPH	RPL6	Q02878	MAD	-2	7	FALSE
HTP0090B	Plasma	SciLifeLab peptide array	RPLP0_HPRR580058	VVLMGKNTMMRKAIRGHLENNPALEKLLPHIRGNVGFVFTKEDLTEIRDMLLANKVPAAARAGAIAPCEVTVPAQNTGLGPEKTSFFQALGIT	RPLP0	P05388	MAD	1	2.1	FALSE
HTP0090B	Plasma	SciLifeLab peptide array	RPLP1_HPRR580030	MASVSELACIYSALILHDDEVTVTEDKINALIKAAGVNVEPFWPGLFAKALANVNIGSLICNVGAGGPAPAAGAAPAGGPAPSTAAAPAEEKKVEAKKEESEESDDDMG	RPLP1	P05386	MAD	-1	1	FALSE
HTP0090B	Plasma	SciLifeLab peptide array	RPLP2_HPRR3830386	MRYVASYLLAALGGNSSPSAKDIKKILDSVGIEADDDRLNKVIS	RPLP2	P05387	MAD	-1	0	FALSE
HTP0090B	Plasma	SciLifeLab peptide array	RPLP2_HPRR4290615	SELNGKNIEDVIAQGIGKLASVPAGGAVAVSAAPGSAAP	RPLP2	P05387	MAD	-1	5.3	FALSE
HTP0090B	Plasma	SciLifeLab peptide array	RYR1_HPRR3420763	REFLHNNLHLQGKVEGSPSLRWQMALYRGVPGREEDADDPEKIVRRVQEVSAVLYYLDQTEHPYKSKK	RYR1	P21817	MAD	-1	0	FALSE
HTP0090B	Plasma	SciLifeLab peptide array	SAE1_HPRR3280030	NSIKFFTGDVFGYHGYTFANLGEHEFVEEKTKVAKVSQGVEDGPDTKRAKLDSSETTMVKKKVVFCPVKEALE	SAE1	Q9UBE0	MAD	-1	3	FALSE
HTP0090B	Plasma	SciLifeLab peptide array	SAE1_HPRR3280031	KGLTMLDHEQVTPEDPGAQFLIRTGSVGRNRAEASLERAQNLNPMVDVKVDTEDIEKKPESFFTQFDAVCLTCCSRD	SAE1	Q9UBE0	MAD	73	23.4	TRUE
HTP0090B	Plasma	SciLifeLab peptide array	SARS_HPRR1390005	NVLSFDDLTADALANLKVSQIKKVRLLIDEAILKCDAERIKLEAERFENLREIGNLLHPSVPISNDEDVDNKVERIWGDCTVRKKYSHVDLVVMVDGFEGEKGAVVAGSRGYFLKGVLVFLEQALIQYAL	SARS	P49591	MAD	6	3	TRUE
HTP0090B	Plasma	SciLifeLab peptide array	SARS_HPRR4160317	GSRGYIPIYTPFFMRKEVMQEVAQLSQFDEELYKVIGKGSEKSDDNSYDEKYLIATSEQPIAALHRDEWLRPEDLPIKYAGLSTCFRQ	SARS	P49591	MAD	1	5.1	FALSE
HTP0090B	Plasma	SciLifeLab peptide array	SIAH2_HPRR1450566	QPQHTPSPQHHELTSLFECPVCFDYVLPPILQCQAGHLVCNQCRQKLSCCP	SIAH2	O43255	MAD	1	2	FALSE
HTP0090B	Plasma	SciLifeLab peptide array	SIAH2_HPRR4040718	TGPSANKPCSKQPPPQPQHTPSPA	SIAH2	O43255	MAD	83	158.8	FALSE
HTP0090B	Plasma	SciLifeLab peptide array	SLC14A1_HPRR4030315	MNGRSLIGGAGDARHGPVWKDPFGTKAGDAARRGIARLSLALADGSQEQE	SLC14A1	Q13336	MAD	0	1	FALSE
HTP0090B	Plasma	SciLifeLab peptide array	SLC14A1_HPRR4030316	GHYNPFFPAKLVIPITTAPNISWSDLSALELLKSIPVGVGQI	SLC14A1	Q13336	MAD	1	1	FALSE
HTP0090B	Plasma	SciLifeLab peptide array	SLC26A4_HPRR2440187	FGLLTVVLRVQFPSWNGLGSIPSTDIYKSTKNYKNIEEPQGVKILRFSSPIFYGNVDGFKKCIKSTVGFDAIRVYNKRLKALRK	SLC26A4	O43511	MAD	-1	-1	FALSE
HTP0090B	Plasma	SciLifeLab peptide array	SLC26A4_HPRR2440190	IEKLEQCGFFDDNIRKDTFFLTVHDAILYLQNQVKSQEGQGSILETITLIQDCKDTLELIETELTEEELDVQDE	SLC26A4	O43511	MAD	-2	-1	FALSE
HTP0090B	Plasma	SciLifeLab peptide array	SLC26A4_HPRR3870179	QLPEYSCSYMVSRPVYSELAFQQQHERRLQERKTLRESLAKCCSCSRKRAFGVLKTLVPILE	SLC26A4	O43511	MAD	2	2	FALSE
HTP0090B	Plasma	SciLifeLab peptide array	SLC30A8_HPRR2180114	MEFLERTYLVNDKAAKMYAFTLESVELQQKPVNKDQCPRERPEELESGGMYHCHSGSKPTEKGANEYAYAKWK	SLC30A8	Q8IWU4	MAD	1	19.2	FALSE
HTP0090B	Plasma	SciLifeLab peptide array	SLC30A8_HPRR3970264	LHQRCLGHNHKEVQANASVRAA	SLC30A8	Q8IWU4	MAD	-1	1	FALSE
HTP0090B	Plasma	SciLifeLab peptide array	SLC30A8_HPRR3970265	LSAHVATAASRDSQVVRREIAKALSKSFTMHSLTIQMESPVDQDPDCLFCEDPCD	SLC30A8	Q8IWU4	MAD	1	6	FALSE
HTP0090B	Plasma	SciLifeLab peptide array	SNRPB*_HPRR400172	TFKAFDKHMNLILCDCDEFRKIKPKNAKQPEREEKRVLGLVLLRGENLVSMTVEGPPPKDTGIARVPLAGAAGGPGVGRAAGRGVPAGVPIPQ	SNRPB*	P14678;P63162	MAD	-1	2	FALSE
HTP0090B	Plasma	SciLifeLab peptide array	SNRPB*_HPRR4320676	QAPAGLAGPVRGVGGPSQQVMTPQGRGT	SNRPB*	P14678;P63162	MAD	-1	1.1	FALSE
HTP0090B	Plasma	SciLifeLab peptide array	SNRPD1_HPRR3120151	SMNTHLKAVKMTLKNREPVQLETLSIRGNNIRYFILPDSLPLDTLLVDVEPKVKSKKREAVAGRGR	SNRPD1	P62314	MAD	0	1.1	FALSE
HTP0090B	Plasma	SciLifeLab peptide array	SNRPD1_HPRR4000134	MKLVRFLMKLSHETVTIELKNGTQVHGTITGVDVS	SNRPD1	P62314	MAD	10	10.1	FALSE
HTP0090B	Plasma	SciLifeLab peptide array	SNRPD2_HPRR3250190	GKGKKKSKPVNKDRYISKMFLRGDSVIVVLRNPLIAGK	SNRPD2	P62316	MAD	-1	0	FALSE
HTP0090B	Plasma	SciLifeLab peptide array	SNRPD2_HPRR3250191	REEEEFNTGPLSVLTQSVKNNTQVLINCRNNKKLLGRVKAFDRHCNMVLENVKEMWTE	SNRPD2	P62316	MAD	0	1	FALSE
HTP0090B	Plasma	SciLifeLab peptide array	SNRPD3_HPRR220243	KVLHEAEGHIVTCETNTGEVYRGKLIEAEDNMNCQMSNITVTYRDGRVAQLEQVYIRGSKIRFLILPDMLKNAPMLKSMKNKNQGSGAGRGKAAILKAQVAARGRGRGMGRGNI	SNRPD3	P62318	MAD	1	1.1	FALSE
HTP0090B	Plasma	SciLifeLab peptide array	SNRPF_HPRR1720018	LNPKPFLNGLTGKPVMVKLKWGMEYKGYLVSVDGYMNMQLANTEEYIDGALSGHLGEVLIRCNNVLYIRGVEEEEEDG	SNRPF	P62306	MAD	6	9.1	FALSE
HTP0090B	Plasma	SciLifeLab peptide array	SNRPG_HPRR3400115	MSKAHPPELKKFMDKKLSLKLNGGRHVQGILRGFDPFMNLVIDECVEMATSGQQNNIGMVVIRGNSIIMLEALE	SNRPG	P62308	MAD	-1	0.1	FALSE
HTP0090B	Plasma	SciLifeLab peptide array	SOX10_HPRR3830104	YSAAGYGLGSALAVASGHSAWISKPPGVALPTVSPPGVDAKAQVKTETA	SOX10	P56693	MAD	8	13	FALSE
HTP0090B	Plasma	SciLifeLab peptide array	SOX13_HPRR3410162	QDARQLLHSHSGALDGSPNTPFRKDLISLDSSPAKERLEDGCVHPLEEAMLSCDMDGSRHFPESRNSSHI	SOX13	Q9UN79	MAD	2	3	FALSE
HTP0090B	Plasma	SciLifeLab peptide array	SOX13_HPRR3410163	DVLYPRAAGMPLAQPLVEHYVPRSLDPNMPVIVNTCSLREEGEGTDDRHSVADGEMYRYSEDEDSEGEEKSDGELVVLT	SOX13	Q9UN79	MAD	-1	3	FALSE
HTP0090B	Plasma	SciLifeLab peptide array	SOX9_HPRR360171	SQRTHIKTEQLSPSHYSEQQQHSPQQIAYSPFNLPHYSPSYPPITRSQYDYTDHQNSSSYYSHAAGQGTGLYSTFTYMNPAQRPMYTPIADTSGVPSIPQTHSPQHWEQPVYTQLTR	SOX9	P48436	MAD	-1	1.1	FALSE
HTP0090B	Plasma	SciLifeLab peptide array	SOX9_HPRR4180522	PFMKMTDEQEKGLSGAPSPTMSEDSAGSPCPSGSGSDTENTRPQENTFPKGEPDLKKESEEDKF	SOX9	P48436	MAD	-1	8.2	FALSE
HTP0090B	Plasma	SciLifeLab peptide array	SP100_HPRR2240001	YKGFENVIHDKLPLQESEEEEREERSGLQLSLEQGTGENSFRSLTWPPSGSPSHAGTTPPENGLSEHPCETEQINAKRKDTTSDKDDSLGSQQTNEQCAQKAEPTESCEQIAVQVNNGDAGREMPCPL	SP100	P23497	MAD	-1	2.5	FALSE
HTP0090B	Plasma	SciLifeLab peptide array	SP100_HPRR2240002	QARTHHNQASDIIVISSEDSEGSTDVDEPLEVFISAPRSEPVINNDNPLESNDEKEGQEATCSRPQIVPEPMDFRKLSTFRESFKKRVIGQDHDFSESSE	SP100	P23497	MAD	-3	1	FALSE
HTP0090B	Plasma	SciLifeLab peptide array	SP140_HPRR1450089	SELEKTFGWSHLEALFSRINLMAYPDLNEIYRSFQNVCYEHSPLQMNNVNDLEDRPRLLPYGKQENSNACHEMDDIAVPQEALSSSPRCEPGFSSESCEQLALPKAGGGDAEDAPSLLPGGGVSCKLAIQIDEGESEEMPKLLP	SP140	Q13342	MAD	0	4.2	FALSE
HTP0090B	Plasma	SciLifeLab peptide array	SP140_HPRR4160718	LSLLPGEGEEGSDDCSEMCDGEERQEASSSLARRGSVSSELENHPMNEEGESEELASSLLYDNVPGAEQSA	SP140	Q13342	MAD	-1	2	FALSE
HTP0090B	Plasma	SciLifeLab peptide array	SRP14_HPRR2870077	GTVEGFEPADNKCLLRATDGKKKISTVVSSKEVNKFQMAYSNLLRANMDGLKKRDKKNKTKKTKAAAAA	SRP14	P37108	MAD	0	0	FALSE
HTP0090B	Plasma	SciLifeLab peptide array	SRP14_HPRR3930096	MVLLESEQFLTELTRLFQKCRTSGSVYITLKKYDGRTKPIPKK	SRP14	P37108	MAD	0	1	FALSE
HTP0090B	Plasma	SciLifeLab peptide array	SRP19_HPRR2870087	DVQYRGRVRVQLKQEDGSLCLVQFPSRKSVMLYAAEMIPKLKTRTQKTGGADQSLQQGEGSK	SRP19	P09132;Q15695	MAD	-1	3	FALSE
HTP0090B	Plasma	SciLifeLab peptide array	SRP19_HPRR2870088	DQDRFICIYPAYLNNKKTIAEGRRIPISKAVENPTATEIQDVCSAVGLNVFLEKNKMYSREWNR	SRP19	P09132;Q15695	MAD	0	2	FALSE
HTP0090B	Plasma	SciLifeLab peptide array	SRP54_HPRR3720460	VIIASEGVEKFKNENFEIIIVDTSGRHKQEDSLFEEMLQVANAIQPDNIVYVMDASIGQACEAQAKAFKDKVDVASVIVT	SRP54	P61011	MAD	1	4.1	FALSE
HTP0090B	Plasma	SciLifeLab peptide array	SRP54_HPRR3720461	SALRSLSNATIINEEVLNAMLKEVCTALLEADVNIKLVKQLRENVKSAIDLEEMASGLNKRKMIQHAVFKELVKLVDPGVKAWTPTKGKQNV	SRP54	P61011	MAD	-1	2	FALSE
HTP0090B	Plasma	SciLifeLab peptide array	SRP68_HPRR2500803	AESEETKERLFESMLSECRDAIQVVREELKPDQKQRDYILEGEPGKVSNLQYLHSYLTYIKLSTAIKRNENMAKGLQRALLQQQPEDDSKRSPRPQDLIRLYDIILQNLVELL	SRP68	Q9UHB9	MAD	-3	-2	FALSE
HTP0090B	Plasma	SciLifeLab peptide array	SRP68_HPRR2500805	GEENKENERPSAGSKANKEFGDSLSLEILQIIKESQQQHGLRHGDFQRYRGYCSRRQRRLRKTLNFKMGNRHKFTGKKVTEELLTDNRYLLLVLMDAERAWSYAMQLKQEANTEPRKRFHLLSRLRKAVKHAEELERLCE	SRP68	Q9UHB9	MAD	-1	0	FALSE
HTP0090B	Plasma	SciLifeLab peptide array	SRP68_HPRR2500807	DAKTKLEAQAYTAYLSGMLRFEHQEWKAAIEAFNKCKTIYEKLASAFTEEQAVLYNQRVEEISPNIRYCAYNIGDQSAINELMQMRLRSGGTEGLLAEKLEALITQTRAKQAATMSEVEWRGRTVPVKIDKVRIFLLGLADNEAAIV	SRP68	Q9UHB9	MAD	-1	1.1	FALSE
HTP0090B	Plasma	SciLifeLab peptide array	SRP72_HPRR2870116	QHTKAIELLQEFSDQHPENAAEIKLTMAQLKISQGNISKACLILRSIEELKHKPGMVSALVTMYSHEEDIDSAIEVFTQAIQWYQNHQPKSPA	SRP72	O76094	MAD	-2	0	FALSE
HTP0090B	Plasma	SciLifeLab peptide array	SRP72_HPRR2870118	ENALKTIESANQQTDKLKELYGQVLYRLERYDECLAVYRDLVRNSQDDYDEERKTNLSAVVAAQSNWEKVVPENLGLQEGTHELCYNTACA	SRP72	O76094	MAD	-1	2.1	FALSE
HTP0090B	Plasma	SciLifeLab peptide array	SRP72_HPRR2870119	ANFKLKYGRKKEAISDLQQLWKQNPKDIHTLAQLISAYSLVDPEKAKALSKHLPSSDSMSLKVDVEALENSAGATYIRKKGGKVTGDSQPKEQG	SRP72	O76094	MAD	0	4	FALSE
HTP0090B	Plasma	SciLifeLab peptide array	SSB_HPRR2010045	AKICHQIEYYFGDFNLPRDKFLKEQIKLDEGWVPLEIMIKFNRLNRLTTDFNVIVEALSKSKAELMEISEDKTKIRRSPSKPLPEVTDEYKNDVKNRSVYIKGFPTDATLDD	SSB	P05455	MAD	0	19.5	FALSE
HTP0090B	Plasma	SciLifeLab peptide array	SSB_HPRR2010046	VVFDSIESAKKFVETPGQKYKETDLLILFKDDYFAKKNEERKQNKVEAKLRAKQEQEAKQKL	SSB	P05455	MAD	1	4.1	FALSE
HTP0090B	Plasma	SciLifeLab peptide array	SSSCA1_HPRR3050793	NGAEVDDFSWEPPTEAETKVLQARRERQDRISRLMGDYLLRGYRMLGETCADCGTILLQDKQRKIYCVACQELDSDVDKDNPALNAQAALSQAR	SSSCA1	O60232	MAD	-1	0	FALSE
HTP0090B	Plasma	SciLifeLab peptide array	SUMO1_HPRR2920297	QDSSEIHFKVKMTTHLKKLKESYCQRQGVPMNSLRFLFEGQRIADNHTPKELGMEEEDVIEVYQEQT	SUMO1	P63165	MAD	1	1	FALSE
HTP0090B	Plasma	SciLifeLab peptide array	SUMO1_HPRR3890167	SDQEAKPSTEDLGDKKEGEYIKLKV	SUMO1	P63165	MAD	0	3	FALSE
HTP0090B	Plasma	SciLifeLab peptide array	SUMO4*_HPRR3230036	TDKPAQLEMEDEDTIDVFQQPTGGV	SUMO4*	Q6EEV6;P55854;P61956	MAD	-1	2.1	FALSE
HTP0090B	Plasma	SciLifeLab peptide array	SUMO4*_HPRR3230037	HINLKVAGQDGSVVQFKIKRHTPLSKLMKAYC	SUMO4*	Q6EEV6;P55854;P61956	MAD	-1	0	FALSE
HTP0090B	Plasma	SciLifeLab peptide array	TALDO1_HPRR3050870	FVGRILDWHVANTDKKSYEPLEDPGVKSVTKIYNYYKKFSYKTIVMGASFRNTGEIKALAGCDFLTISPKLLGEL	TALDO1	P37837	MAD	6	1	TRUE
HTP0090B	Plasma	SciLifeLab peptide array	TALDO1_HPRR3050873	MSSSPVKRQRMESALDQLKQFTTVVADTGDFHAIDEYKPQDATTNPSLILAAAQMPAYQELVEEAIAYGRKLGGS	TALDO1	P37837	MAD	0	8.2	FALSE
HTP0090B	Plasma	SciLifeLab peptide array	TARS_HPRR3010092	MFEEKASSPSGKMGGEEKPIGAGEEKQKEGGKKKNKEGSGDGGRAELNPWPEYIYTRLEMYNIL	TARS	P26639	MAD	-1	0	FALSE
HTP0090B	Plasma	SciLifeLab peptide array	TARS_HPRR3890005	RDNKVHGERTISETIERLQQLKEFRSKQAEEEF	TARS	P26639	MAD	0	3.2	FALSE
HTP0090B	Plasma	SciLifeLab peptide array	TDRD6_HPRR2630195	VLHVDYGRKELVSCSSLRYLLPEYFRMPVVTYPCALYGLWDGGRGWSRSQVGDLKALILGKAVNAKIEFYCSFEHVYYVSLYGEDGINLNRVFGVQSC	TDRD6	O60522	MAD	2	2	FALSE
HTP0090B	Plasma	SciLifeLab peptide array	TDRD6_HPRR4290688	INSSYKELKLLQSLTKTNLVTQYQDSVGNKNSQVFPLTTEKKEEISAETPLKTARVEATLSERKIGDSCDKDLPLKFCEFPQKTI	TDRD6	O60522	MAD	-1	25.1	FALSE
HTP0090B	Plasma	SciLifeLab peptide array	TG_HPRR350042	KMCSADYADLLQTFQVFILDELTARGFCQIQVKTFGTLVSIPVCNNSSVQVGCLTRERLGVNVTWKSRLEDIPVASLPDLHDIERALVGKDLLGRFTDLIQSGSFQLHLDSKTFPAETIRFLQGDHFGTSPRTWFGCSEGFYQVLTSEASQDGLGCVKCPEGS	TG	P01266	MAD	-2	-1	FALSE
HTP0090B	Plasma	SciLifeLab peptide array	TGM2_HPRR2430028	MAEELVLERCDLELETNGRDHHTADLCREKLVVRRGQPFWLTLHFEGRNYEASVDSLTFSVVTGPAPSQEAGTK	TGM2	P21980	MAD	1	2	FALSE
HTP0090B	Plasma	SciLifeLab peptide array	TGM2_HPRR2430030	VEPVINSYLLAERDLYLENPEIKIRILGEPKQKRKLVAEVSLQNPLPVALEGCTFTVEGAGLTEEQKTVEIPDPVEAGEEVKVRMDLLP	TGM2	P21980	MAD	-1	0	FALSE
HTP0090B	Plasma	SciLifeLab peptide array	TH_HPRR2010098	EFGLCKQNGEVKAYGAGLLSSYGELLHCLSEEPEIRAFDPEAAAVQPYQDQTYQSVYFVSESFSDAKDKLRSYASRIQRPFSVKFDPYTLAIDVLDSPQAVRRSLEGVQDEL	TH	P07101	MAD	-1	0	FALSE
HTP0090B	Plasma	SciLifeLab peptide array	TH_HPRR3790012	SESFSDAKDKLRSYASRIQRPFSVKFDPYTLAIDVLDSPQAVRRSLEGVQDELDTLAHALSAIG	TH	P07101	MAD	-1	2	FALSE
HTP0090B	Plasma	SciLifeLab peptide array	TKT_HPRR2460038	HYYEGGIGEAVSSAVVGEPGITVTHLAVNRVPRSGKPAELLKMFGIDRDAIAQAVRGLITKA	TKT	P29401	MAD	2	2.1	FALSE
HTP0090B	Plasma	SciLifeLab peptide array	TKT_HPRR2460039	IAKTFKGRGITGVEDKESWHGKPLPKNMAEQIIQEIYSQIQSKKKILATPPQEDAPSVDIANIRMPSLPSYKVGDKIATRKAYGQ	TKT	P29401	MAD	1	2	FALSE
HTP0090B	Plasma	SciLifeLab peptide array	TMEM59_HPRR1950574	HLLFPLTLVRSFWSDMMDSAQSFITSSWTFYLQADDGKIVIFQSKPEIQYAPHLEQEPTNLRESSLSKMSSDLQMRNSQAHRNFLEDGESDGFLRCLSLNSGW	TMEM59	Q9BXS4	MAD	0	1	FALSE
HTP0090B	Plasma	SciLifeLab peptide array	TNFRSF13C_HPRR221279	SWRRRQRRLRGASSAEAPDGDKDAPEPLDKVIILSPGISDATAPAWPPPGEDPGTTPPGHSVPVPATELGSTELVTTKTAGPEQQ	TNFRSF13C	Q96RJ3	MAD	0	2	FALSE
HTP0090B	Plasma	SciLifeLab peptide array	TNNC1_HPRR3460135	NADGYIDLDELKIMLQATGETITEDDIEELM	TNNC1	P63316	MAD	-1	1	FALSE
HTP0090B	Plasma	SciLifeLab peptide array	TNNC1_HPRR3460136	MDDIYKAAVEQLTEEQKNEFKAAFDIFVLGAEDGCISTKELGKVM	TNNC1	P63316	MAD	0	2.1	FALSE
HTP0090B	Plasma	SciLifeLab peptide array	TNNC2_HPRR3300245	NADGYIDPEELAEIFRASGEHVTDEEIESLM	TNNC2	P02585	MAD	-3	51.1	FALSE
HTP0090B	Plasma	SciLifeLab peptide array	TNNC2_HPRR3870324	ARSYLSEEMIAEFKAAFDMFDADGGGDISVKE	TNNC2	P02585	MAD	1	2	FALSE
HTP0090B	Plasma	SciLifeLab peptide array	TNNI2_HPRR3960019	ELEKEESRREAEKQNYLAEHCPPLHIPGSMSEVQELCKQLHAKIDAAEEEKYDMEVRVQKTSK	TNNI2	P48788	MAD	-1	6.6	FALSE
HTP0090B	Plasma	SciLifeLab peptide array	TNNI3_HPRR3140624	PIRRRSSNYRAYATEPHAKKKSKISASRKLQLKTLLLQIAKQELEREAEERRGEKGRALSTRCQPLELAGLGFAELQ	TNNI3	P19429	MAD	-1	0	FALSE
HTP0090B	Plasma	SciLifeLab peptide array	TNNT1_HPRR3920058	EEEEAPEEPEPVAEPEEERPKPSRPVVPPLIPPKIPEGE	TNNT1	P13805	MAD	1	25.7	FALSE
HTP0090B	Plasma	SciLifeLab peptide array	TNNT2_HPRR2190018	IEEVVEEYEEEEQEEAAVEEEDWREDEDEQEEAAEEDAEAEAETEETRAEEDEEEEEAKEAEDGPMEESKPKPRSFMPNLV	TNNT2	P45379	MAD	1	98.7	FALSE
HTP0090B	Plasma	SciLifeLab peptide array	TNNT2_HPRR2190019	EEEENRRKAEDEARKKKALSNMMHFGGYIQKQAQTERKSGKRQTEREKKKKILAERRKVLAIDHLNEDQLREKAKELWQSIYNLEAEKFDLQEKFKQQKYEINVLRNRINDNQKVSK	TNNT2	P45379	MAD	0	2.1	FALSE
HTP0090B	Plasma	SciLifeLab peptide array	TNNT3_HPRR3050240	RKPLNIDHLGEDKLRDKAKELWETLHQLEIDKFEFGEKLKRQKYDITTLRSRIDQAQKHSKKAGTPAKGKVG	TNNT3	P45378	MAD	-1	0.2	FALSE
HTP0090B	Plasma	SciLifeLab peptide array	TNNT3_HPRR3890527	EEEAQEEAAEVHEEVHEPEEVQEDTAEEDAEEEKPRPKLTAPK	TNNT3	P45378	MAD	0	5	FALSE
HTP0090B	Plasma	SciLifeLab peptide array	TOP1_HPRR2420091	GDHLHNDSQIEADFRLNDSHKHKDKHKDREHRHKEHKKEKDREKSKHSNSEHKDSEKKHKEKEKTKHKDGSSEKH	TOP1	P11387	MAD	-1	0	FALSE
HTP0090B	Plasma	SciLifeLab peptide array	TOP1_HPRR2420092	KVRASGDAKIKKEKENGFSSPPQIKDEPEDDGYFVPPKEDIKPLKRPRDEDDADYKPKK	TOP1	P11387	MAD	1	23.1	FALSE
HTP0090B	Plasma	SciLifeLab peptide array	TOP1_HPRR2420093	KKEKKRKLEEEEDGKLKKPKNKDKDKKVPEPDNKKKKPKKEEEQKWKWWEEERYPEGIKWKFLEHKGPVFAPPYEPLPENVKFYYD	TOP1	P11387	MAD	3	2	TRUE
HTP0090B	Plasma	SciLifeLab peptide array	TOP2A_HPRR1370117	RGQRVIPRITIEMKAEAEKKNKKKIKNENTEGSPQEDGVELEGLKQRLEKKQKREPGTKTKKQTTLAFKPIKKGKKRNPWSDSESDRSSDESNFDVP	TOP2A	P11388	MAD	2	3.1	FALSE
HTP0090B	Plasma	SciLifeLab peptide array	TOP2A_HPRR1370118	DASPPKTKTSPKLSNKELKPQKSVVSDLEADDVKGSVPLSSSPPATHFPDETEITNPVPKKNVTVKKTAAKSQSSTSTTGAKKRAAPKGTKRDPALNSGVSQKPDPAKTKNRRKRKPSTSDDSDSNFEKIVSKAVTSKKSKG	TOP2A	P11388	MAD	7	22.2	FALSE
HTP0090B	Plasma	SciLifeLab peptide array	TPH1_HPRR1220002	ISELKHALSGHAKVKPFDPKITCKQECLITTFQDVYFVSESFEDAKEKMREFTKTIKRPFGVKYNPYTRSIQILKDTKSITSAMNELQHDLDVVSDALAKVSRKPSI	TPH1	P17752	MAD	3	1	TRUE
HTP0090B	Plasma	SciLifeLab peptide array	TPM4*_HPRR3340170	EMQLKEAKHIAEEADRKYEEVARKLVILE	TPM4*	P67936;P07951;P09493;P06753	MAD	-2	16	FALSE
HTP0090B	Plasma	SciLifeLab peptide array	TPM4*_HPRR3340171	KAADESERGMKVIENRAMKDEEKMEIQE	TPM4*	P67936;P07951;P09493;P06753	MAD	-2	0	FALSE
HTP0090B	Plasma	SciLifeLab peptide array	TPM4*_HPRR3340172	LNRRIQLVEEELDRAQERLATALQKLEE	TPM4*	P67936;P07951;P09493;P06753	MAD	-1	11.1	FALSE
HTP0090B	Plasma	SciLifeLab peptide array	TPO_HPRR1950563	RELEKHSLSRVICDNTGLTRVPMDAFQVGKFPEDFESCDSITGMNLEAWRETFPQDDKCGFPESVENGDFVHCEESGRRVLVYSCRHGYELQGREQLTCTQEGWDFQPPLCKDVNECADGA	TPO	P07202	MAD	-1	22.9	FALSE
HTP0090B	Plasma	SciLifeLab peptide array	TPO_HPRR4180385	STVICRWTRTGTKSTLPISETGGGTPELRCGKHQAVGTSPQRAAAQDSEQESAGMEGRDTHRLPRA	TPO	P07202	MAD	45	59.6	FALSE
HTP0090B	Plasma	SciLifeLab peptide array	TRIM21_HPRR1060031	LEKDEREQLRILGEKEAKLAQQSQALQELISELDRRCHSS	TRIM21	P19474	MAD	3	15.4	FALSE
HTP0090B	Plasma	SciLifeLab peptide array	TRIM24_HPRR3500066	NCAEFNEPDSEVANAGIKLENYFEELLKNLYPEKRFPKPEFRNESEDNKFSDDSDDDFVQPRKKRLKSIEERQLLK	TRIM24	O15164	MAD	12	21.2	FALSE
HTP0090B	Plasma	SciLifeLab peptide array	TRIM24_HPRR3500067	SSPVGGSYNLPSLPDIDCSSTIMLDNIVRKDTNIDHGQPRPPSNRTVQSPNSSVPSPGLAGPVTMTSVHPPIRSPSA	TRIM24	O15164	MAD	0	0	FALSE
HTP0090B	Plasma	SciLifeLab peptide array	TRIM28_HPRR4180661	TDSTFSLDQPGGTLDLTLIRARLQEKLSPPYSSPQEFAQDVGRMFKQFNKLTEDKADVQSIIGLQRFFETRMNEAFGDTKFSAVLV	TRIM28	Q13263	MAD	-2	1	FALSE
HTP0090B	Plasma	SciLifeLab peptide array	TRIM33_HPRR640002	MQPHLQRQHSNPGHAGPFPVVSVHNTTINPTSPTTATMANANRGPTSPSVTAIELIPSVTNPENLPSLPDIPPIQLEDAGSSSLDNLLSRYISGSHLPPQPTSTMNPSPGPSALSPGSSGLSNSHTPVRPPSTSSTGSR	TRIM33	Q9UPN9	MAD	2	7	FALSE
HTP0090B	Plasma	SciLifeLab peptide array	TROVE2_HPRR400060	ESVNQMQPLNEKQIANSQDGYVWQVTDMNRLHRFLCFGSEGGTYYIKEQKLGLENAEALIRLIEDGRGCEVIQEIKSFSQEGRTTKQEPMLFALAICSQCSDISTKQAAFKAVSEVCRIPTHLFTFIQFKKDLKESMKCGMWG	TROVE2	P10155	MAD	2	4	FALSE
HTP0090B	Plasma	SciLifeLab peptide array	TROVE2_HPRR400061	FLLAVDVSASMNQRVLGSILNASTVAAAMCMVVTRTEKDSYVVAFSDEMVPCPVTTDMTLQQVLMAMSQIPAGGTDCSLPMIWAQKTNTPADVFIVFTDNETFAGGVHPAIALREYRKKMDIPAKLIVCGMTSNGF	TROVE2	P10155	MAD	-3	-2	FALSE
HTP0090B	Plasma	SciLifeLab peptide array	TRPC3_HPRR2870071	NFPKCRRRRLQKDIEMGMGNSKSRLNLFTQSNSRVFESHSFNSILNQPTRYQQI	TRPC3	Q13507	MAD	1	2.1	FALSE
HTP0090B	Plasma	SciLifeLab peptide array	TSGA10_HPRR2920463	IASLGESLAMKEKTISGMKNIIAEMEQASRQCTEALIVCEQDVSRMRRQLDETNDELAQIARERDILAHDNDNLQEQFAKAKQENQ	TSGA10	Q9BZW7	MAD	2	19.9	FALSE
HTP0090B	Plasma	SciLifeLab peptide array	TSGA10_HPRR2920464	RREMMKSCKSPKSTTAHAILRRVETERDVAFTDLRRMTTERDSLRERLKIAQETAFNEKAHLEQRIEELECTVHNLDDERMEQMSNM	TSGA10	Q9BZW7	MAD	0	19.3	FALSE
HTP0090B	Plasma	SciLifeLab peptide array	TSHR_HPRR141622	RADLSYPSHCCAFKNQKKIRGILESLMCNESSMQSLRQRKSVNALNSPLHQEYEENLGDSIVGYKEKSKFQDTHNNAHYYVFFEEQEDEIIGFGQELKNPQEETLQAFDSHYDYTICGDSEDMVCTPKSDEFNPC	TSHR	P16473	MAD	-2	-1	FALSE
HTP0090B	Plasma	SciLifeLab peptide array	TSHR_HPRR4220232	MGCSSPPCECHQEEDFRVTCKDIQRIPSLPPSTQTLKLIETHLRTIPSHAFSNLPNISRIYVSIDVTLQQLESHSF	TSHR	P16473	MAD	-2	-1	FALSE
HTP0090B	Plasma	SciLifeLab peptide array	TTN_HPRR1830052	GTVSTSCYLAVQVSEEFEKETTAVTEKFTTEEKRFVESRDVVMTDTSLTEEQAGPGEPAAPYFITKPVVQKLVEGGSVVFGCQVGGNPKPHVYWKKSGVPLTTGYRYKVSYNKQTGECKLVISMTFADDAGEYT	TTN	Q8WZ42	MAD	3	7	FALSE
HTP0090B	Plasma	SciLifeLab peptide array	TTN_HPRR1830053	HFLSILTIDTSDAEDYSCVLVEDENVKTTAKLIVEGAVVEFVKELQDIEVPESYSGELECIVSPENIEGKWYHNDVELKSNGKYTITSRRGRQNLTVKDVTKEDQGEYSFVIDGKKTTCKLKMK	TTN	Q8WZ42	MAD	2	4.1	FALSE
HTP0090B	Plasma	SciLifeLab peptide array	UBA1_HPRR232462	KISFKSLVASLAEPDFVVTDFAKFSRPAQLHIGFQALHQFCAQHGRPPRPRNEEDAAELVALAQAVNARALPAVQQNNLDEDLIRKLAYVAAGDLAPINAFIGGLAAQEVMKACSGKFMPIMQWLYFDALECLPEDKEVLTEDKCLQR	UBA1	P22314	MAD	3	3	FALSE
HTP0090B	Plasma	SciLifeLab peptide array	UBA1_HPRR232463	LYKVVQGHRQLDSYKNGFLNLALPFFGFSEPLAAPRHQYYNQEWTLWDRFEVQGLQPNGEEMTLKQFLDYFKTEHKLEITMLSQGVSMLYSFFMPAAKLKERLDQPMTEIVSRVSKRKLGRHVRALVLELCCNDESGEDVEVPYVRYTIR	UBA1	P22314	MAD	2	5	FALSE
HTP0090B	Plasma	SciLifeLab peptide array	UGT1A1_HPRR3790923	SHWLSMLGAIQQLQQRGHEIVVLAPDASLYIRDGAFYTLKTYPVPFQREDVKES	UGT1A1	P22309	MAD	-1	0	FALSE
HTP0090B	Plasma	SciLifeLab peptide array	UGT1A5*_HPRR4420458	HRSCVELLHNEALIRHLHATSFDVVLTDP	UGT1A5*	P35504;P22310;P35503	MAD	-1	7.1	FALSE
HTP0090B	Plasma	SciLifeLab peptide array	UGT1A6_HPRR3761044	WLSMKDIVEVLSDRGHEIVVVVPEVNLLLKESKYYTRKIYPVPYDQEELKNRYQSFGNNHFAERSFLTAPQTEYRNNMIVIGLY	UGT1A6	P19224	MAD	-2	0	FALSE
HTP0090B	Plasma	SciLifeLab peptide array	UGT1A8*_HPRR3340348	QPVKPLDRAVFWIEFVMRHKGAKHLRVAAHDLTWFQYHSL	UGT1A8*	Q9HAW9;Q9HAW8;O60656;Q9HAW7;P19224;P35504;P22310;P35503;P22309;O75795;P54855;P36537;Q6UWM9;P16662;O75310;Q9BY64;P06133;Q9Y4X1	MAD	0	1	FALSE
HTP0090B	Plasma	SciLifeLab peptide array	UGT2A1_HPRR1951665	KEHNVTVLVASGALFITPTSNPSLTFEIYKVPFGKERIEGVIKDFVLTWLENRPSPSTIWRFYQEMAKVIKDFHMVSQEICDGVLKNQQLMAKLKKSKFEVLVSDPVFPCGDIVALKLGIPFMYS	UGT2A1	Q9Y4X1	MAD	6	6	FALSE
HTP0090B	Plasma	SciLifeLab peptide array	VCL_HPRR350132	KMIDERQQELTHQEHRVMLVNSMNTVKELLPVLISAMKIFVTTKNSKNQGIEEALKNRNFTVEKMSAEINEIIRVLQLTSWDEDAWASKDTEAMKRALASIDSKLNQAKGWLRDPSASPGDAGEQAIRQILDEAGKVGELCAGKERREI	VCL	P18206	MAD	0	6.1	FALSE
HTP0090B	Plasma	SciLifeLab peptide array	VCL_HPRR4160211	SALTSKLADLRRQGKGDSPEARALAKQVATALQNLQTKTNRAVANSRPAKAAVHLEGKIEQAQRWIDNPTVDDRGVGQAAIRGLVAEGHRLANVMMGP	VCL	P18206	MAD	3	4	FALSE
HTP0090B	Plasma	SciLifeLab peptide array	VIM_HPRR370004	FANYIDKVRFLEQQNKILLAELEQLKGQGKSRLGDLYEEEMRELRRQVDQLTNDKARVEVERDNLAEDIMRLREKLQEEMLQREEAENTLQSFRQDVDNASLARLDLERKVES	VIM	P08670	MAD	9	2	TRUE
HTP0090B	Plasma	SciLifeLab peptide array	WARS_HPRR141609	TDSDCIGKISFPAIQAAPSFSNSFPQIFRDRTDIQCLIPCAIDQDPYFRMTRDVAPRIGYPKPALLHSTFFPALQGAQTKMSASDPNSSIFLTDTAKQIKTKVNKHAFSGGRDTIEEHRQFGGNCDVDVSFMYLTF	WARS	P23381	MAD	-1	0	FALSE
HTP0090B	Plasma	SciLifeLab peptide array	WARS_HPRR141610	DATEAEEDFVDPWTVQTSSAKGIDYDKLIVRFGSSKIDKELINRIERATGQRPHHFLRRGIFFSHRDMNQVLDAYENKKPFYLYTGRGPSSEAMHVGHLIPFIFTKWLQDVFNVPLVIQMTDDEKYLWKDLTLDQAYSYAVENA	WARS	P23381	MAD	3	6	FALSE
HTP0090B	Plasma	SciLifeLab peptide array	XKR6_HPRR2540593	YGVLHPTGPRAKILASSCCAELLWGIPLPPDVEPMAPEIPGYRGTQVTPTRAVTEQQEDLTADTCLPVFQVRPMGPPTPLGRPYLPEGPLIKIDMPR	XKR6	Q5GH73	MAD	-3	0.1	FALSE
HTP0090B	Plasma	SciLifeLab peptide array	XKR6_HPRR4040109	FVDRRLRRTINILQYVTPTAVGIRYRDGPLLYELLQYESSL	XKR6	Q5GH73	MAD	-2	1	FALSE
HTP0090B	Plasma	SciLifeLab peptide array	XKR8_HPRR3410225	GLLVWQQEEPSEFDLAYADFLALDISM	XKR8	Q9H6D3	MAD	-1	2.1	FALSE
HTP0090B	Plasma	SciLifeLab peptide array	XKR8_HPRR3410226	HPSCCWKPDPDQVDGARSLLSPEGYQLPQNRRMTHLAQKFFPKAKDEAASPVKG	XKR8	Q9H6D3	MAD	-1	2	FALSE
HTP0090B	Plasma	SciLifeLab peptide array	XKR9_HPRR2180234	FHPNRSAETKCDEIDGKPVLRECRMRYFLME	XKR9	Q5GH70	MAD	1	5.1	FALSE
HTP0090B	Plasma	SciLifeLab peptide array	YARS_HPRR2320095	GNVENNGVLSFIKHVLFPLKSEFVILRDEKWGGNKTYTAYVDLEKDFAAEVVHPGDLKNSVEVALNKLLDPIREKFNTPALKKLASAAYPDPSKQKPMAKGPAKNSEPEEVIPSRLDIRVGKIITVEKHPDAD	YARS	P54577	MAD	0	15.7	FALSE
HTP0090B	Plasma	SciLifeLab peptide array	YARS_HPRR2320096	VLCNLKPQKMRGVESQGMLLCASIEGINRQVEPLDPPAGSAPGEHVFVKGYEKGQPDEELKPKKKVFEKLQADFKISEECIAQWKQTNFMTKLGSIS	YARS	P54577	MAD	-1	1	FALSE
HTP0090B	Plasma	SciLifeLab peptide array	ZNF688_HPRR3610291	QWIHRSCSGGRRGRRPGIRAVPRAPVRGDRDPPVLFRHYPDIFEECG	ZNF688	P0C7X2	MAD	1	1	FALSE
HTP0090B	Plasma	SciLifeLab peptide array	ZNF688_HPRR3610292	GERLGGARRGDVPNRKEEEPEEVPRAKGPRKAPVKESPEVLVERNPDPAISVAPARAQPPKNAAWDPTTGAQ	ZNF688	P0C7X2	MAD	147	316.9	FALSE
HTP0392A	Plasma	SciLifeLab peptide array	A2M_HPRR350039	SVLLMKPDAELSASSVYNLLPEKDLTGFPGPLNDQDDEDCINRHNVYINGITYTPVSSTNEKDMYSFLEDMGLKAFTNSKIRKPKMCPQLQQYEMHGPEGLRVGFYESDVMGRGHARLVHVEEPHTETVRKYFPETWIWDLVVVNS	A2M	P01023	MAD	1	3	FALSE
HTP0392A	Plasma	SciLifeLab peptide array	AARS_HPRR3160056	DRASKADVQKRVLEKTKQFIDSNPNQPLVILEMESGASAKALNEALKLFKMHSPQTSAMLFTVDNEAGKITCLCQVPQNAANRGLKASEWVQQVSGLMDGKGGGKD	AARS	P49588	MAD	0	7.1	FALSE
HTP0392A	Plasma	SciLifeLab peptide array	AARS_HPRR3160058	EFTVKNAQVRGGYVLHIGTIYGDLKVGDQVWLFIDEPRRRPIMSNHTATHILNFALRSVLGEADQKGSLVAPDRLRFDFTAKGAMSTQQIKKAEEIANEMIEAAKAVYTQDCP	AARS	P49588	MAD	1	1	FALSE
HTP0392A	Plasma	SciLifeLab peptide array	ABCC8_HPRR2060003	DHLGKENDVFQPKTQFLGVYFVSSQ	ABCC8	Q09428	MAD	1	2	FALSE
HTP0392A	Plasma	SciLifeLab peptide array	ABCC8_HPRR4160072	VSVQKLSEFLSSAEIREEQCAPHEPTPQGPASKYQAVPLRVVNRKRPAREDCRGLTGPLQSLVPSADGDADNCCVQIMGGYFTWTPD	ABCC8	Q09428	MAD	-1	1.1	FALSE
HTP0392A	Plasma	SciLifeLab peptide array	ACHE_HPRR2440120	RGIRLKTPGGPVSAFLGIPFAEPPMGPRRFLPPEPKQPWSGVVDATTFQSVCYQYVDTLYPGFEGTEMWNPNRE	ACHE	P22303	MAD	1	1.1	FALSE
HTP0392A	Plasma	SciLifeLab peptide array	ACHE_HPRR3870163	TVGMGEARRRATQLAHLVGCPPGGTGGNDTELVACLRTRPAQVLVNHEWHVLPQESVFRFSFVPVVDGDFLSDTPEALINAGDFHG	ACHE	P22303	MAD	1	1	FALSE
HTP0392A	Plasma	SciLifeLab peptide array	ACTA2*_HPRR3230094	PKANREKMTQIMFETFNTPAMYVAIQ	ACTA2*	P62736;P63267;A5A3E0;P0CG38;P0CG39;Q6S8J3;P63261;P60709;P68032;P68133;Q562R1	MAD	2	8	FALSE
HTP0392A	Plasma	SciLifeLab peptide array	ACTA2*_HPRR3230096	MVGMGQKDSYVGDEAQSKRGILTLKYPIEHGIVTNWD	ACTA2*	P62736;P63267;A5A3E0;P0CG38;P0CG39;Q6S8J3;P63261;P60709;P68032;P68133;Q562R1	MAD	1	0	TRUE
HTP0392A	Plasma	SciLifeLab peptide array	AIMP1_HPRR2310067	CNLKPAKMRGVLSQAMVMCASSPEKIEILAPPNGSVPGDRITFDAFPGEPDKELNPKKKIWEQIQPDLHTNDECVATYKGVPFEVKGKGVCRAQTMSNSGI	AIMP1	Q12904	MAD	-2	1	FALSE
HTP0392A	Plasma	SciLifeLab peptide array	AIMP1_HPRR2310068	MANNDAVLKRLEQKGAEADQIIEYLKQQVSLLKEKAILQATLREEKKLRVENAKLKKEIEELKQELIQAEIQNGV	AIMP1	Q12904	MAD	87	67.3	TRUE
HTP0392A	Plasma	SciLifeLab peptide array	AIMP1_HPRR2310069	TPLHANSMVSENVIQSTAVTTVSSGTKEQIKGGTGDEKKAKEKIEKKGEKKEKKQQSIAGSADSKPIDVSRLDLRIGCIITARKHPDADSLY	AIMP1	Q12904	MAD	1	38	FALSE
HTP0392A	Plasma	SciLifeLab peptide array	AIMP2_HPRR2440262	APLRVELPTCMYRLPNVHGRSYGPAPGAGHVQEESNLSLQALESRQDDILKRLYELKAAVDGLSKMIQTPDADLDVTNIIQADEPTTLTTNAL	AIMP2	Q13155	MAD	-1	2.2	FALSE
HTP0392A	Plasma	SciLifeLab peptide array	AIMP2_HPRR2440263	SVLGKDYGALKDIVINANPASPPLSLLVLHRLLCEHFRVLSTVHTHSSVKSVPENLLKCFGEQNKKQPRQDYQLGFTLIWKNVPKTQ	AIMP2	Q13155	MAD	-1	-0.9	FALSE
HTP0392A	Plasma	SciLifeLab peptide array	AIMP2_HPRR2440264	IARFLFSLFGQKHNAVNATLIDSWVDIAIFQLKEGSSKEKAAVFRSMNSALGKSPWLAGNELTVADVVLWSVLQQIGGCSVTVPANVQRWMRSCENLAPFNTALKLLK	AIMP2	Q13155	MAD	0	2	FALSE
HTP0392A	Plasma	SciLifeLab peptide array	ALOX12_HPRR1960006	YAWVPNAPCTMRMPPPTTKEDVTMATVMGSLPDVRQACLQMAISWHLSRRQPDMVPLGHHKEKYFSGPKPKAVLNQFRTDLEKLEKEITARNEQLDWPYEY	ALOX12	P18054	MAD	0	1	FALSE
HTP0392A	Plasma	SciLifeLab peptide array	ALOX12_HPRR1960007	PGDNALDMFQKHREKELKDRQQIYCWATWKEGLPLTIAADRKDDLPPNMRFHEEKRLDFEWTLKAGALEMALKRVYTLLSSWNCLEDFDQIFWGQKSALAEKVRQCWQDDELFSYQFLNGANP	ALOX12	P18054	MAD	-1	0	FALSE
HTP0392A	Plasma	SciLifeLab peptide array	ANO2_HPRR3070034	PTDISDQIKKEKSLLVDFFLKEEHEKLKLMDEPALRSPGGGDRSRSRAASSAPSGQSQLGSMMSSGSQHTNV	ANO2	Q9NQ90	MAD	-1	8.2	FALSE
HTP0392A	Plasma	SciLifeLab peptide array	ANO2_HPRR3070036	EPVSLEARLSRMHFHDSQRKVDYVLAYHYRKRGVHLAQGFPGHSLAIVSNGETGKEPHAGGPGDIELGPLDALEEERKEQREEFEHNLM	ANO2	Q9NQ90	MAD	0	17.4	FALSE
HTP0392A	Plasma	SciLifeLab peptide array	ANO2_HPRR3070037	IPLLPGSPRRLSPQAGSRGGQGPKHGQQCLKMPGPRAPGLQGGSNRDPGQPCGGESTRSSSVINNYLDAN	ANO2	Q9NQ90	MAD	0	1	FALSE
HTP0392A	Plasma	SciLifeLab peptide array	ANXA2_HPRR3460748	YDAGVKRKGTDVPKWISIMTERSVPHLQKVFDRYKSYSPYDMLESIRKEVKGDLENAFLNLVQCIQNKPLYFADRLYDSMKGKG	ANXA2	P07355	MAD	1	0	TRUE
HTP0392A	Plasma	SciLifeLab peptide array	ANXA2_HPRR3460749	MGRQLAGCGDAGKKASFKMSTVHEILCKLSLEGDHSTPPSAYGSVKAYTNFDAERDALNIETAIKTKGVDEVTIVNI	ANXA2	P07355	MAD	18	48.1	FALSE
HTP0392A	Plasma	SciLifeLab peptide array	ANXA5_HPRR1350096	GTVTDFPGFDERADAETLRKAMKGLGTDEESILTLLTSRSNAQRQEISAAFKTLFGRDLLDDLKSELTGKFEKLIVALMKPSRLYDAYELKHALKGAGTNEKVLTEIIASRTPEELRAIKQVYEEEYGSSLEDDVVG	ANXA5	P08758	MAD	14	8.1	TRUE
HTP0392A	Plasma	SciLifeLab peptide array	ANXA5_HPRR1350097	LVVLLQANRDPDAGIDEAQVEQDAQALFQAGELKWGTDEEKFITIFGTRSVSHLRKVFDKYMTISGFQIEETIDRETSGNLEQLLLAVVKSIRSIPAYLAETLYYAMKGAG	ANXA5	P08758	MAD	-1	11	FALSE
HTP0392A	Plasma	SciLifeLab peptide array	APOH_HPRR350085	EPGEEITYSCKPGYVSRGGMRKFICPLTGLWPINTLKCTPRVCPFAGILENGAVRYTTFEYPNTISFSCNTGFYLNGADSAKCTEEGKWSPELPVCAPIICPPPSIPTFATLRVYKPSAGNNSLYRDTAVFECLPQHAMFGNDTITC	APOH	P02749	MAD	2	4	FALSE
HTP0392A	Plasma	SciLifeLab peptide array	AQP4_HPRR4040261	MSDRPTARRWGKCGPLCTRENIMVAFKGVWTQAFWKA	AQP4	P55087	MAD	1	1	FALSE
HTP0392A	Plasma	SciLifeLab peptide array	ARFGAP1_HPRR3300073	TLPSMVHRVSGQPQSVTASSDKAFEDWLNDDLGSYQGAQGNRYVGFGNTPPPQKKEDDFLNNAMSSLYSGWSSFTTGASRFASAAKEGATKFGSQASQKASEL	ARFGAP1	Q8N6T3	MAD	278	324.3	FALSE
HTP0392A	Plasma	SciLifeLab peptide array	ARFGAP1_HPRR3300076	DHFQNSNIDQSFWETFGSAEPTKTRKSPSSDSWTCADTSTERRSSDSWEVWGSASTNRNSNSDGGEGGEGTKKAVPPAVPTDDGWD	ARFGAP1	Q8N6T3	MAD	0	9.1	FALSE
HTP0392A	Plasma	SciLifeLab peptide array	CACNA1S_HPRR3410011	EEEKSTMAKKLEQKPKGEGIPTTAKLKIDEFESNVNEVKDPYPSADFPGDDEEDEPEIPLSPRPRPLAEL	CACNA1S	Q13698	MAD	0	16.6	FALSE
HTP0392A	Plasma	SciLifeLab peptide array	CACNA1S_HPRR3410014	ESPVFLEDFPQDPRTNPLARANTNNANANVAYGNSNHSNSHVFSSVHYEREFPEETETPATRGRALGQPCRVLGPHSKPCVE	CACNA1S	Q13698	MAD	-2	16	FALSE
HTP0392A	Plasma	SciLifeLab peptide array	CARS_HPRR400045	SQCNLYMAARKAVRKRPNQALLENIALYLTHMLKIFGAVEEDSSLGFPVGGPGTSLSLEATVMPYLQVLSEFREGVRKIAREQKVPEILQLSDALRDNILPELGVRFEDHEGLPTVVKLVDRNTLLKEREEKRRVE	CARS	P49589	MAD	0	3	FALSE
HTP0392A	Plasma	SciLifeLab peptide array	CARS_HPRR400046	HLFEQYREKRPEAAQLLEDVQAALKPFSVKLNETTDPDKKQMLERIQHAVQLATEPLEKAVQSRLTGEEVNSCVEVLLEEAKDLLSDWLDSTLGCDVTDNSIFSKLPKFWEGDFHRDMEALNVLPPDVL	CARS	P49589	MAD	1	4	FALSE
HTP0392A	Plasma	SciLifeLab peptide array	CASR_HPRR3140049	ADDDYGRPGIEKFREEAEERDICIDFSELISQYSDEEEIQHVVEVIQNSTAKVIVVFSSGPDLEPLIKEIVRRNITGKIWLASEAWASSSLI	CASR	P41180	MAD	-1	-1	FALSE
HTP0392A	Plasma	SciLifeLab peptide array	CASR_HPRR3140052	GTVTFSLSFDEPQKNAMAHRNSTHQNSLEAQKSSDTLTRHQPLLPLQCGETDLDLTVQETGLQGPVGGDQRPEVEDPEELSPALVVSSSQSFVISGG	CASR	P41180	MAD	-1	5.2	FALSE
HTP0392A	Plasma	SciLifeLab peptide array	CAST_HPRR3010396	STYIEELGKREVTIPPKYRELLAKKEGITGPPADSSKPIGPDDAIDALSSDFTCGSPTAAGKKTEKEESTEVLKAQSAGTVRSAAP	CAST	P20810	MAD	-1	6.5	FALSE
HTP0392A	Plasma	SciLifeLab peptide array	CAST_HPRR3010397	GPQNASSLKFEDAKLAAAISEVVSQTPASTTQAGAPPRDTSQSDKDLDDALDKLSDSLGQRQPDPDENKPMEDKVKE	CAST	P20810	MAD	93	42.2	TRUE
HTP0392A	Plasma	SciLifeLab peptide array	CENPA_HPRR3730167	PSLGASSHQHSRRRQGWLKEIRKLQKSTHLL	CENPA	P49450	MAD	-1	0	FALSE
HTP0392A	Plasma	SciLifeLab peptide array	CENPA_HPRR3890121	RKLPFSRLAREICVKFTRGVDFNWQAQALLAL	CENPA	P49450	MAD	1	2.1	FALSE
HTP0392A	Plasma	SciLifeLab peptide array	CENPB_HPRR3310037	ERGVVQQVKGHYRQAMLLKAMAALEGQDPSGLQLGLTEALHFVAAAWQAVEPSDIAACFREAGFGGGPNATITTSL	CENPB	P07199	MAD	1	1.1	FALSE
HTP0392A	Plasma	SciLifeLab peptide array	CENPB_HPRR3310039	TFREKSRIIQEVEENPDLRKGEIARRFNIPPSTLSTILKNKRAILASERKYGVASTCRKTNKLSPYDKLEGLLIAWFQQIRAAGLPVKGIIL	CENPB	P07199	MAD	-1	0	FALSE
HTP0392A	Plasma	SciLifeLab peptide array	CENPE_HPRR1470072	EKIENLTRMLVTSSSLTLQQELKAKRKRRVTWCLGKINKMKNSNYADQFNIPTNITTKTHKLSINLLREIDESVCSESDVFSNTLDTLSEIEWNPATKLLNQENIESELNSLRADYDN	CENPE	Q02224	MAD	1	3.1	FALSE
HTP0392A	Plasma	SciLifeLab peptide array	CENPE_HPRR4340147	MRVKANLSLPYLQTKHIEKLFTANQRCSMEFHRIMKKLKYVLSYVTKIKEEQHESINKFEMDFIDEVEKQKELLIKIQHLQQDCDVPSRELRDLKLNQNMD	CENPE	Q02224	MAD	0	0.1	FALSE
HTP0392A	Plasma	SciLifeLab peptide array	CENPF_HPRR1390029	SCWKSENEKLLTQMESEKENLQSKINHLETCLKTQQIKSHEYNERVRTLEMDRENLSVEIRNLHNVLDSKSVEVETQKLAYMELQQKAEFSDQKHQKEIENMCLKTSQLTGQVEDLEHKLQLLSNEIMDKDRCYQDLHAEYE	CENPF	P49454	MAD	4	96.8	FALSE
HTP0392A	Plasma	SciLifeLab peptide array	CENPF_HPRR1390030	CISELSFSGPNALVPMDFLGNQEDIHNLQLRVKETSNENLRLLHVIEDRDRKVESLLNEMKELDSKLHLQEVQLMTKIEACIELEKIVGELKKENSDLSEKLEYFSCDHQEL	CENPF	P49454	MAD	0	2	FALSE
HTP0392A	Plasma	SciLifeLab peptide array	CHD3_HPRR3420199	LKIKLGLLGGKREKGGSYVFQSDEGPEPEAEESDLDSGSVHSASGRPDGPVRTKKLKRGRPGRKKKKLLGCPA	CHD3	Q12873	MAD	1	1	FALSE
HTP0392A	Plasma	SciLifeLab peptide array	CHGA_HPRR300004	NSPMNKGDTEVMKCIVEVISDTLSKPSPMPVSQECFETLRGDERILSILRHQNLLKELQDLALQGAKERAHQQKKHSGFEDELSEVLENQSSQAELKEAVEEPSSKDVMEKREDSKEAEKSGEATDGARPQALPEPMQESK	CHGA	P10645	MAD	0	17.4	FALSE
HTP0392A	Plasma	SciLifeLab peptide array	CHRNA1_HPRR4110442	MKLGTWTYDGSVVAINPESDQPDLSNFMESGEWVIKESRGWKHSVTYSCCPDTPYLDITYHF	CHRNA1	P02708	MAD	-1	3	FALSE
HTP0392A	Plasma	SciLifeLab peptide array	CLDN11*_HPRR2010004	NDWVVTCGYTIPTCRKLDELGSKGLWADCVMATGLYHCKPLVDILILPGY	CLDN11*	O75508	MAD	1	1	FALSE
HTP0392A	Plasma	SciLifeLab peptide array	CLDN11_HPRR2010005	DAQAFGENRFYYTAGSSSPTHAKSAHV	CLDN11	O75508	MAD	-1	3.3	FALSE
HTP0392A	Plasma	SciLifeLab peptide array	CNP_HPRR2500894	TLARVIVDKYRDGTKMVSADAYKITPGARGAFSEEYKRLDEDLAAYCRRRDIRILVLDDTNHERERLEQLFEMADQYQYQVVLVEPKTAWRLDCAQLKEKNQW	CNP	P09543	MAD	0	21.4	FALSE
HTP0392A	Plasma	SciLifeLab peptide array	CNP_HPRR2500896	PGVLHCTTKFCDYGKAPGAEEYAQQDVLKKSYSKAFTLTISALFVTPKTTGARVELSEQQLQLWPSDVDKLSPTDNLPRGSRAHITL	CNP	P09543	MAD	3	38.5	FALSE
HTP0392A	Plasma	SciLifeLab peptide array	COL17A1_HPRR3500044	NLPSHVWSSTLPAGSSMGTYHNNMTTQSSSLLNTNAYSAGSVFGVPNNMASCSPTLHPGLSTSSSVFGMQNNLAPSLTTLSHGTTTTSTA	COL17A1	Q9UMD9	MAD	0	0	FALSE
HTP0392A	Plasma	SciLifeLab peptide array	COL17A1_HPRR3500046	DGTEVTERIVTETVTTRLTSLPPKGGTSNGYAKTASLGGGSRLEKQSLTHGSSGYINSTGSTRGHASTSSYRRAHSPASTLPNSPGSTFERKTHVTR	COL17A1	Q9UMD9	MAD	6	10	FALSE
HTP0392A	Plasma	SciLifeLab peptide array	CPE_HPRR270004	VLSANLHGGDLVANYPYDETRSGSAHEYSSSPDDAIFQSLARAYSSFNPAMSDPNRPPCRKNDDDSSFVDGTTNGGAWYSVPGGMQDFNYLSSNCFEITVELSCEKFPPEETLKTYWEDNKNSLISYLEQIHR	CPE	P16870	MAD	-2	5.1	FALSE
HTP0392A	Plasma	SciLifeLab peptide array	CPE_HPRR4180113	GNYKLTASAPGYLAITKKVAVPYSPAAGVDFELESFSERKEEEKEELMEWWKMMS	CPE	P16870	MAD	1	56.3	FALSE
HTP0392A	Plasma	SciLifeLab peptide array	CRYAB_HPRR2700063	RPFFPFHSPSRLFDQFFGEHLLESDLFPTSTSLSPFYLRPPSFLRAPSWFDTGLSEMRLEKDRFSVNLDVKHFSPEELKVKVLGDVIE	CRYAB	P02511	MAD	2	1	TRUE
HTP0392A	Plasma	SciLifeLab peptide array	CRYAB_HPRR3880249	KYRIPADVDPLTITSSLSSDGVLTVNGPRKQVSGPERTIPITREEKPAVTAA	CRYAB	P02511	MAD	1	7	FALSE
HTP0392A	Plasma	SciLifeLab peptide array	CYP11A1_HPRR2120012	RSVLVKGCQTFLSAPREGLGRLRVPTGEGAGISTRSPRPFNEIPSPGDNGWLNLYHFWRETGTHKVHLHHVQNFQKYGPIYREKLGNVESVYVIDPEDVALLFKSEGPNPERFLIPPWVAYHQYYQRPIGVLLKKSAA	CYP11A1	P05108	MAD	-1	1	FALSE
HTP0392A	Plasma	SciLifeLab peptide array	CYP17A1_HPRR670228	PFLPRHGHMHNNFFKLQKKYGPIYSVRMGTKTTVIVGHHQLAKEVLIKKGKDFSGRPQMATLDIASNNRKGIAFADSGAHWQLHRRLAMATFALFKDGDQKLEKIICQEISTLCDMLATHNGQSIDISFPVFVAVTNVISL	CYP17A1	P05093	MAD	0	0	FALSE
HTP0392A	Plasma	SciLifeLab peptide array	CYP1A2_HPRR2760237	YQDFDKNSVRDITGALFKHSKKGPRASGNLIPQEKIVNLVNDIFGAGFDTVTTAISWSLMYLVTKPEIQRK	CYP1A2	P05177	MAD	2	1.1	TRUE
HTP0392A	Plasma	SciLifeLab peptide array	CYP21A2_HPRR3440127	LIGGTETTANTLSWAVVFLLHHPEIQQRLQEELDHELGPGASSSRVPYKDRARLPLLNATIAEV	CYP21A2	P08686	MAD	-1	1	FALSE
HTP0392A	Plasma	SciLifeLab peptide array	CYP21A2_HPRR3440129	GLTQKFGPIYRLHLGLQDVVVLNSKRTIEEAMVKKWADFAGRPEPLTYKLVSRNYPDLSLGDYSLLW	CYP21A2	P08686	MAD	0	0	FALSE
HTP0392A	Plasma	SciLifeLab peptide array	CYP2D6_HPRR3440145	EYDDPRFLRLLDLAQEGLKEESGFLREVLNAVPVLLHIPALAGKVLRFQKAFLTQLDELLTEHRMTWDPAQPPRDLTE	CYP2D6	P10635	MAD	2	2	FALSE
HTP0392A	Plasma	SciLifeLab peptide array	CYP2D6_HPRR3440146	KGTTLITNLSSVLKDEAVWKKPFRF	CYP2D6	P10635	MAD	-1	6.1	FALSE
HTP0392A	Plasma	SciLifeLab peptide array	DARS_HPRR2370049	DKYPLAVRPFYTMPDPRNPKQSNSYDMFMRGEEILSGAQRIHDPQLLTERALHHGIDLEKIKAYIDSFRFGAPPHAGGGIGLERVTMLFLGLHNVRQTSMFPRD	DARS	P14868	MAD	2	5	FALSE
HTP0392A	Plasma	SciLifeLab peptide array	DARS_HPRR2370051	LHVQKIYVISLAEPRLPLQLDDAVRPEAEGEEEGRATVNQDTRLDNRVIDLRTSTSQAVFRLQSGICHLFRETLINKGFVEIQTPKIISAASEGGANVFTVSYFKNNAYLAQSPQLYKQMCICAD	DARS	P14868	MAD	2	10	FALSE
HTP0392A	Plasma	SciLifeLab peptide array	DBT_HPRR2550879	YVCFFGYPSFKYSHPHHFLKTTAALRGQVVQFKLSDIGEGIREVTVKEWYVKEGDTVSQFDSICEVQSDKASVTI	DBT	P11182	MAD	2	2	FALSE
HTP0392A	Plasma	SciLifeLab peptide array	DBT_HPRR2550880	VGKPLVDIETEALKDSEEDVVETPAVSHDEHTHQEIKGRKTLATPAVRRLAMENNIKLSEVVGSGKDGRILKEDILNYLEKQ	DBT	P11182	MAD	8	10.1	FALSE
HTP0392A	Plasma	SciLifeLab peptide array	DBT_HPRR2550882	LQFPILNASVDENCQNITYKASHNIGIAMDTEQGLIVPNVKNVQICSIFDIATELNRLQKLGSVGQLSTTDLTGGTFTLSNIGSIGGTFAKPVIMPPEVAIGA	DBT	P11182	MAD	-1	7.9	FALSE
HTP0392A	Plasma	SciLifeLab peptide array	DLAT_HPRR3050438	LLPALSPTMTMGTVQRWEKKVGEKLSEGDLLAEIETDKATIGFEVQEEGYLAKILVPEGTRDVPLGTPLCIIVEKEADISAFADYRPTEVTDLKPQVPPPT	DLAT	P10515	MAD	4	49.5	FALSE
HTP0392A	Plasma	SciLifeLab peptide array	DLST_HPRR140690	QNTCAMLTTFNEIDMSNIQEMRARHKEAFLKKHNLKLGFMSAFVKASAFALQEQPVVNAVIDDTTKEVVYRDYIDISVAVATPRGLVVPVIRNVEAMNFADIERTITELGEKARKNELAIEDMDGGTFTISNGGVFGSLFGTPII	DLST	P36957	MAD	1	1	FALSE
HTP0392A	Plasma	SciLifeLab peptide array	DLST_HPRR4210012	PLCVSGVQPLALRLPEGELPSRETFPACINNS	DLST	P36957	MAD	0	0.1	FALSE
HTP0392A	Plasma	SciLifeLab peptide array	DPF2_HPRR2250142	SFPSIKPDTDQTLKKEGLISQDGSSLEALLRTDPLEKRGAPDPRVDDDSLGEFPVTNSRARKRILEPDDFLDDLDDEDYEEDTPKRRGKGKSKGKGVGS	DPF2	Q92785	MAD	1	11.1	FALSE
HTP0392A	Plasma	SciLifeLab peptide array	DPF2_HPRR3890698	AEEEGEDKEDSQPPTPVSQRSEEQKSKKGPDGLALPNNY	DPF2	Q92785	MAD	1	1	FALSE
HTP0392A	Plasma	SciLifeLab peptide array	DSC1_HPRR1950849	SCTGTLVVHLDDYNDHAPQIDKEVTICQNNEDFAVLKPVDPDGPENGPPFQFFLDNSASKNWNIEEKDGKTAILRQRQNLDYNYYSVPIQIKDRHGLVATHMLTVRVCDCSTPSECRMKDKSTR	DSC1	Q08554	MAD	3	5.6	FALSE
HTP0392A	Plasma	SciLifeLab peptide array	DSG1_HPRR1370121	SLQLSIGVRNKAEFHHSIMSQYKLKASAISVTVLNVIEGPVFRPGSKTYVVTGNMGSNDKVGDFVATDLDTGRPSTTVRYVMGNNPADLLAVDSRTGKLTLKNKVTKEQYNMLGGKYQGTILSIDDNLQRTCTGT	DSG1	Q02413	MAD	1	2	FALSE
HTP0392A	Plasma	SciLifeLab peptide array	DSG1_HPRR4180926	EPVPECSDGAIHSWAVEGPQPEPRDITTVIPQIPPDNANIIECIDNSGVYTNEYGGREMQDLGGGERMTGFELTEGVKTSGMPEICQEYSG	DSG1	Q02413	MAD	-1	10.5	FALSE
HTP0392A	Plasma	SciLifeLab peptide array	DSG3_HPRR3120202	FRPASKTFTVQKGISSKKLVDYILGTYQAIDEDTNKAASNVKYVMGRNDGGYLMIDSKTAEIKFVKNMNRDSTFIVNKTITAEVLAIDEYTGKTSTGTVYVRVPDFND	DSG3	P32926	MAD	5	6	FALSE
HTP0392A	Plasma	SciLifeLab peptide array	DSG3_HPRR3120203	SSPSVVVSARTLNNRYTGPYTFALEDQPVKLPAVWSITTLNATSALLRAQEQIPPGVYHISLVLTDSQNNRCEMPRSLTLEVCQCDNRGICGTSY	DSG3	P32926	MAD	1	1	FALSE
HTP0392A	Plasma	SciLifeLab peptide array	DST_HPRR2620326	KPRCQNVAEDMDIQLCASILNENSDENENINTMILLDKMHSCSSLEKQQRVNVVQLASPSENNLVTEKSNLPEYTTEIAGKSKENLLNHE	DST	Q03001	MAD	-1	28.3	FALSE
HTP0392A	Plasma	SciLifeLab peptide array	DST_HPRR2620328	MLPGEHQQVLSNLQSRFEDFLEDSQESQVFSGSDITQLEKEVNVCKQYYQELLKSAEREEQEESVYNLYISEVRNIRLRLENCEDRLIRQIRTPLERDDLHESVF	DST	Q03001	MAD	3	4.2	FALSE
HTP0392A	Plasma	SciLifeLab peptide array	EGFR_HPRR290109	QQGFFSSPSTSRTPLLSSLSATSNNSTVACIDRNGLQSCPIKEDSFLQRYSSDPTGALTEDSIDDTFLPVPEYINQSVPKRPAGSVQNPVYHNQPLNPAPSRDPHYQDPHSTAVGNPEYLNTVQPTCVNSTFDSPAHWAQKGSHQISLD	EGFR	P00533	MAD	0	25.1	FALSE
HTP0392A	Plasma	SciLifeLab peptide array	ENO3*_HPRR3360053	DGTENKSKFGANAILGVSLAVCKAG	ENO3*	P13929;P09104;P06733	MAD	0	0	FALSE
HTP0392A	Plasma	SciLifeLab peptide array	ENO3*_HPRR4290181	QACKLAQENGWGVMVSHRSGETEDTFIADLVVGLCTGQIKTGAPCRSERLAKYNQLMRIEEE	ENO3*	P13929;P09104;P06733	MAD	0	0.1	FALSE
HTP0392A	Plasma	SciLifeLab peptide array	ENO3*_HPRR4370068	LKNVIKEKYGKDATNVGDEGGFAPNIL	ENO3*	P13929;P09104;P06733	MAD	0	10.1	FALSE
HTP0392A	Plasma	SciLifeLab peptide array	ENO3_HPRR252476	ALELLKTAIQAAGYPDKVVIGMDVAASEFYRNGKYDLDFKSPDDPARHITGEKLGELYKSFIKNYPVVSIEDPFDQDDWATWTSFLSGVNIQIVGDDLTVTN	ENO3	P13929	MAD	0	6	FALSE
HTP0392A	Plasma	SciLifeLab peptide array	F12_HPRR350057	YHKCTHKGRPGPQPWCATTPNFDQDQRWGYCLEPKKVKDHCSKHSPCQKGGTCVNMPSGPHCLCPQHLTGNHCQKEKCFEPQLLRFFHKNEIWYRTEQAAVARCQCKGPDA	F12	P00748	MAD	-2	-0.9	FALSE
HTP0392A	Plasma	SciLifeLab peptide array	F2_HPRR350027	VRRQECSIPVCGQDQVTVAMTPRSEGSSVNLSPPLEQCVPDRGQQYQGRLAVTTHGLPCLAWASAQAKALSKHQDFNSAVQLVENFCRNPDGDEEGVWCYVAGKPGDFGYCDLNY	F2	P00734	MAD	-1	4	FALSE
HTP0392A	Plasma	SciLifeLab peptide array	F2_HPRR3790030	EGVWCYVAGKPGDFGYCDLNYCEEAVEEETGDGLDEDSDRAIEGRTATSEYQTFFNPRTFGSGEADCGLRPLFEKKSLE	F2	P00734	MAD	1	22.5	FALSE
HTP0392A	Plasma	SciLifeLab peptide array	F2_HPRR3790031	FEALESSTATDVFWAKYTACETARTPRDKLAACLEGNCAEGLGTNYRGHVNITRSGIECQLWRSRYPHKPEINSTTHPGADLQ	F2	P00734	MAD	-1	7.6	FALSE
HTP0392A	Plasma	SciLifeLab peptide array	F8_HPRR232500	FTQPLYRGELNEHLGLLGPYIRAEVEDNIMVTFRNQASRPYSFYSSLISYEEDQRQGAEPRKNFVKPNETKTYFWKVQHHMAPTKDEFDCKAWAYFSDVDLEKDVHSGLIGPLLVCHTNTLNPAHGRQVTVQEFAL	F8	P00451	MAD	8	4.1	TRUE
HTP0392A	Plasma	SciLifeLab peptide array	F8_HPRR232926	ESKAISDAQITASSYFTNMFATWSPSKARLHLQGRSNAWRPQVNNPKEWLQVDFQKTMKVTGVTTQGVKSLLTSMYVKEFLISSSQDGHQWTLFFQNGKVKVFQGNQDSFTPVVNSLDPPLLTRYLRIHPQSWVHQIALRMEVLGCEA	F8	P00451	MAD	0	0	FALSE
HTP0392A	Plasma	SciLifeLab peptide array	FARS2_HPRR2010057	GTPLFSVYDNLSPVVTTWQNFDSLLIPADHPSRKKGDNYYLNRTHMLRAHTSAHQWDLLHAGLDAFLVVGDVYRRDQIDSQHYPIFHQLEAVRLFSKHELFAGIKDGES	FARS2	O95363	MAD	0	1	FALSE
HTP0392A	Plasma	SciLifeLab peptide array	FARSA_HPRR400146	EVIEAELRSTKHWELTAEGEEIAREGSHEARVFRSIPPEGLAQSELMRLPSGKVGFSKAMSNKWIRVDKSAADGPRVFRVVDSMEDEVQRRLQLVRGGQAEKLGEKERSELRKRKLLAEVTLKTYWVSKG	FARSA	Q9Y285	MAD	-1	1	FALSE
HTP0392A	Plasma	SciLifeLab peptide array	FHL1_HPRR252319	RFTAVEDQYYCVDCYKNFVAKKCAGCKNPITGFGKGSSVVAYEGQSWHDYCFHCKIRRAPPLSNN	FHL1	Q13642	MAD	-2	-1	FALSE
HTP0392A	Plasma	SciLifeLab peptide array	FLG_HPRR2551092	SERWSGSASRNHLGSAWEQSRDGSRHPGSHHEDRAGHGHSADSSRQSGTRHTESSSRGQAASSHEQARSSAGERHGSRHQLQSA	FLG	P20930	MAD	-1	12	FALSE
HTP0392A	Plasma	SciLifeLab peptide array	FLG_HPRR2551093	SADSSRQSGTPHAETSSGGQAASSHEQARSSPGERHGSRHQQSADSSRHSGIPRRQASSAVRDSGHWGSSGSQASDSEGHSEESDTQSVSGHGQDGPHQQSHQESAR	FLG	P20930	MAD	-1	1	FALSE
HTP0392A	Plasma	SciLifeLab peptide array	FLG_HPRR2551094	RKRLSERLEEKEDNEEGVYDYENTGRMTQKWIQSGHIATYYTIQDEAYDTTDSLLEENKIYERSRSSDGKSSSQVNRSRHENTSQVPLQESR	FLG	P20930	MAD	1	14	FALSE
HTP0392A	Plasma	SciLifeLab peptide array	FLNA_HPRR232447	VICVRFGGEHVPNSPFQVTALAGDQPSVQPPLRSQQLAPQYTYAQGGQQTWAPERPLVGVNGLDVTSLRPFDLVIPFTIKKGEITGEVRMPSGKVAQPTITDNKDGTVTVRYAPSEAGLHEMDIRYDNMHIPGSPLQFYVDYVNCGHVT	FLNA	P21333	MAD	0	2	FALSE
HTP0392A	Plasma	SciLifeLab peptide array	FLNB_HPRR1310070	HGKVGEAGLLSVDCSEAGPGALGLEAVSDSGTKAEVSIQNNKDGTYAVTYVPLTAGMYTLTMKYGGELVPHFPARVKVEPAVDTSRIKVFGPGIEGKDVFREATTDFTV	FLNB	O75369	MAD	-1	7.1	FALSE
HTP0392A	Plasma	SciLifeLab peptide array	FLNC_HPRR1310054	DPVPKSPFVVNVAPPLDLSKIKVQGLNSKVAVGQEQAFSVNTRGAGGQGQLDVRMTSPSRRPIPCKLEPGGGAEAQAVRYMPPEEGPYKVDITYDGHPVPGSPFAVEGVLPPDPSKVC	FLNC	Q14315	MAD	3	17.2	FALSE
HTP0392A	Plasma	SciLifeLab peptide array	FLNC_HPRR1310055	HSLHETSTVLVETVTKSSSSRGSSYSSIPKFSSDASKVVTRGPGLSQAFVGQKNSFTVDCSKAGTNMMMVGVHGPKTPCEEVYVKHMGNRVYNVTYTVKEKGDY	FLNC	Q14315	MAD	0	2	FALSE
HTP0392A	Plasma	SciLifeLab peptide array	FN1_HPRR2050095	AQQMVQPQSPVAVSQSKPGCYDNGKHYQINQQWERTYLGNALVCTCYGGSRGFNCESKPEAEETCFDKYTGNTYRVGDTYERPKDSMIWDCTCIGAGRGRISCTIANRCHEGGQSYKIGDTWRRPHETGGYMLECVCLGNGKGEW	FN1	P02751	MAD	-2	1	FALSE
HTP0392A	Plasma	SciLifeLab peptide array	FN1_HPRR2050096	HEEICTTNEGVMYRIGDQWDKQHDMGHMMRCTCVGNGRGEWTCIAYSQLRDQCIVDDITYNVNDTFHKRHEEGHMLNCTCFGQGRGRWKCDPVDQCQDSETGTFYQIGDSWEKYVHGVRYQCYCYGRGIG	FN1	P02751	MAD	1	2	FALSE
HTP0392A	Plasma	SciLifeLab peptide array	FTCD_HPRR2280077	MRLPKNIPEEKDRRTAALQEGLRRAVSVPLTLAETVASLWLALQELARCGNLACRSDLQVAAKALEMGVFGAYFNVLINLRDITDEAFKDQIHHRV	FTCD	O95954	MAD	1	2	FALSE
HTP0392A	Plasma	SciLifeLab peptide array	FTCD_HPRR2890163	GVSVDECVLCAQAFGQRLAEELDVPVYLYGEAARMDSRRTLPAIRAGEYEALPKKLQQADWAPDFGPSSF	FTCD	O95954	MAD	1	115.6	FALSE
HTP0392A	Plasma	SciLifeLab peptide array	FTCD_HPRR2890164	MSQLVECVPNFSEGKNQEVIDAISGAITQTPGCVLLDVDAGPSTNRTVYTFVGPPECVVEGALNAARVASRLIDMSRHQGEH	FTCD	O95954	MAD	0	4.1	FALSE
HTP0392A	Plasma	SciLifeLab peptide array	FTCD_HPRR2890165	TKEQAHRIALNLREQGRGKDQPGRLKKVQGIGWYLDEKNLAQVSTNLLDFEVTALHTVYEETCREAQELSLPVVGSQLVGLVPLKALLD	FTCD	O95954	MAD	0	1	FALSE
HTP0392A	Plasma	SciLifeLab peptide array	G6PC2_HPRR4090002	INSEMFLLSCRGGNNYTLSF	G6PC2	Q9NQR9	MAD	2	2	FALSE
HTP0392A	Plasma	SciLifeLab peptide array	GAD1_HPRR2920425	QSSKNLLSCENSDRDARFRRTETDFSNLFARDLLPAKNGEEQTVQFLLEVVDILLNYVRKTFDRS	GAD1	Q99259	MAD	0	1	FALSE
HTP0392A	Plasma	SciLifeLab peptide array	GAD1_HPRR2920426	SSATSSNAGADPNTTNLRPTTYDTWCGVAHGCTRKLGLKICGFLQRTNSLEEKSRLVSAFKER	GAD1	Q99259	MAD	-1	0	FALSE
HTP0392A	Plasma	SciLifeLab peptide array	GAD2_HPRR3020281	SGFWSFGSEDGSGDSENPGTARAWCQVAQKFTGGIGNKLCALLYGDAEKPAESGGSQPPRAAARKAACACDQKPCSCSKVDVNYAFLHATDLLP	GAD2	Q05329	MAD	-1	-0.9	FALSE
HTP0392A	Plasma	SciLifeLab peptide array	GAD2_HPRR3890856	STKVIDFHYPNELLQEYNWELADQPQNLEEILMHCQTTLKYAIKTGHPRY	GAD2	Q05329	MAD	-1	0	FALSE
HTP0392A	Plasma	SciLifeLab peptide array	GARS_HPRR2440240	KLMSDKKCSVEKKSEMESVLAQLDNYGQQELADLFVNYNVKSPITGNDLSPPVSFNLMFKTFIGPGGNMPGYLRPETAQGIFLNFKRLLEFNQGKLPFAAAQI	GARS	P41250	MAD	1	3	FALSE
HTP0392A	Plasma	SciLifeLab peptide array	GARS_HPRR2440243	LPLSQNQEFMPFVKELSEALTRHGVSHKVDDSSGSIGRRYARTDEIGVAFGVTIDFDTVNKTPHTATLRDRDSMRQIRAEISELPSIVQDLANGNITWADVEARYPLFEG	GARS	P41250	MAD	3	7.1	FALSE
HTP0392A	Plasma	SciLifeLab peptide array	GIF_HPRR3050322	LFGQVLKDIVEKISMKIKDNGIIGDIYSTGLAMQALSVTPEPSKKEWNCKKTTDMILNEIKQGKFHNPMSIAQILPSLKGKTYLDVPQVTCSPDHEVQPTLPSNP	GIF	P27352	MAD	0	1.1	FALSE
HTP0392A	Plasma	SciLifeLab peptide array	GIF_HPRR3050324	TSSAYPNPSILIAMNLAGAYNLKAQKLLTYQLMSSDNNDLTIGQLGLTIMALTSSCRDPGDKVSILQRQMENWAPSSPNAEASAFYGPSLAILALCQKNS	GIF	P27352	MAD	1	1.1	FALSE
HTP0392A	Plasma	SciLifeLab peptide array	GLRA1_HPRR2140062	LLRFRRKRRHHKEDEAGEGRFNFSAYGMGPACLQAKDGISVKGANNSNTTNPPPAPSKSPEEMRKLFIQRAKKIDK	GLRA1	P23415	MAD	0	2.1	FALSE
HTP0392A	Plasma	SciLifeLab peptide array	GOLGB1_HPRR1951658	RLSGLANVVLHELSGDDDTDQNMRAPLDPELHQESDMEFNNTTQEDVQERLAYAEQLVVELKDIIRQKDVQLQQKDEALQEERKAADNKIKKLKLHAKAKLTSLNKYIEEMKAQGGTVLPTEPQSEEQLSKHD	GOLGB1	Q14789	MAD	-2	-1	FALSE
HTP0392A	Plasma	SciLifeLab peptide array	GOLGB1_HPRR1951659	KHDNQTNVTEEGTQSIPGETEEQDSLSMSTRPTCSESVPSAKSANPAVSKDFSSHDEINNYLQQIDQLKERIAGLEEEKQKNKEFSQTLENEKNTLLSQISTKDGELKMLQEEVTKMNLLNQQIQEELS	GOLGB1	Q14789	MAD	0	6.2	FALSE
HTP0392A	Plasma	SciLifeLab peptide array	GPR62_HPRR2770122	PVRLALGRLSRRALPGPVRACTPQAWHPRALLQCLQRPPEGPAVGPSEAPEQTPELAGGRSPAYQGPPESSL	GPR62	Q9BZJ7	MAD	4	39.3	FALSE
HTP0392A	Plasma	SciLifeLab peptide array	GYPA_HPRR2110422	TSSSVTKSYISSQTNDTHKRDTYAATPRAHEVSEISVRTVYPPEEETGERVQLAHHFSEP	GYPA	P02724	MAD	-1	3	FALSE
HTP0392A	Plasma	SciLifeLab peptide array	GYPE*_HPRR3290141	TTGVAMHTSTSSSVTKSYISSQTN	GYPE*	P15421;P06028;P02724	MAD	-1	0	FALSE
HTP0392A	Plasma	SciLifeLab peptide array	HARS_HPRR3010485	MAERAALEELVKLQGERVRGLKQQKASAELIEEEVAKLLKLKAQLGPDESKQKFVLKTPKGTRD	HARS	P12081	MAD	1	6.1	FALSE
HTP0392A	Plasma	SciLifeLab peptide array	HARS_HPRR4040036	DGVIKLRSVTSREEVDVRREDLVEEIKRRTGQPLCIC	HARS	P12081	MAD	0	3.1	FALSE
HTP0392A	Plasma	SciLifeLab peptide array	HDC_HPRR1320013	LKGPNCLTENVLKEIAKAGRLFLIPATIQDKLIIRFTVTSQFTTRDDILRDWNLIRDAATLILSQHCTSQPSPRVGNLISQIRGARAWACGTSLQSVSGAGDDPVQARKIIKQPQRVGAGPMKRENGLHLETLLDPVDDCFSE	HDC	P19113	MAD	-1	0	FALSE
HTP0392A	Plasma	SciLifeLab peptide array	HDC_HPRR1320014	PALTSWPSLLGDMLADAINCLGFTWASSPACTELEMNVMDWLAKMLGLPEHFLHHHPSSQGGGVLQSTVSESTLIALLAARKNKILEMKTSEPDADESCLNARLVAYASDQAHSSVEK	HDC	P19113	MAD	-1	4.1	FALSE
HTP0392A	Plasma	SciLifeLab peptide array	HINT2_HPRR2470372	GQVRGAAGVTDGNEVAKAQQATPGGAAPTIFSRILDKSLPADILYEDQQCLVFRDVAPQAPVHFLVIPKKP	HINT2	Q9BX68	MAD	0	3	FALSE
HTP0392A	Plasma	SciLifeLab peptide array	HINT2_HPRR2470373	IPRISQAEEEDQQLLGHLLLVAKQTAKAEGLGDGYRLVINDGKLGAQSVYHLHIHVLGGRQLQWP	HINT2	Q9BX68	MAD	0	0	FALSE
HTP0392A	Plasma	SciLifeLab peptide array	HMGCR_HPRR650031	MAGSIGGYNAHAANIVTAIYIACGQDAAQNVGSSNCITLMEASGPTNEDLYISCTMPSIEIGTVGGGTNLLPQQACLQMLGVQGACKDNPGENARQLARIVCGTVMAGELSLMAALAAGHLVKSHMIHNRSKINLQDLQG	HMGCR	P04035	MAD	0	2.1	FALSE
HTP0392A	Plasma	SciLifeLab peptide array	IAPP_HPRR3830128	LVHSSNNFGAILSSTNVGSNTYGKRNAVEVLKREPLNYLP	IAPP	P10997	MAD	-3	1	FALSE
HTP0392A	Plasma	SciLifeLab peptide array	IARS_HPRR2470884	NWYVRMNRRRLKGENGMEDCVMALETLFSVLLSLCRLMAPYTPFLTELMYQNLKVLIDPVSVQDKDTLSIHYLMLPRVREELIDKKTESAVSQMQSVIEL	IARS	P41252	MAD	-1	4.3	FALSE
HTP0392A	Plasma	SciLifeLab peptide array	IARS_HPRR2470886	AREVINRIQKLRKKCNLVPTDEITVYYKAKSEGTYLNSVIESHTEFIFTTIKAPLKPYPVSPSDKVLIQEKTQLKGSELEITLTRGSSLPGPACAYVNLNICANGSEQGGVLL	IARS	P41252	MAD	-1	1	FALSE
HTP0392A	Plasma	SciLifeLab peptide array	ICA1_HPRR1510003	DELLDMKSEEGACLGPVAGTPEPEGADKDDLLLLSEIFNASSLEEGEFSKEWAAVFGDGQVKEPVPTMALGEPDPKAQTGSGFLPSQLLDQNMKDLQASLQEPAKAASDLTAWFSLFADLDPLSNPDAVGKTDKEHELL	ICA1	Q05084	MAD	5	78.4	FALSE
HTP0392A	Plasma	SciLifeLab peptide array	ICA1_HPRR4160047	HESFKGYQPYEFTTLKSLQDPMKKLVEKEEKKKINQQESTDAAVQEPSQLISLEEENQRKESSSFK	ICA1	Q05084	MAD	0	38.8	FALSE
HTP0392A	Plasma	SciLifeLab peptide array	IFIH1_HPRR330271	GWTREFVEALRRTGSPLAARYMNPELTDLPSPSFENAHDEYLQLLNLLQPTLVDKLLVRDVLDKCMEEELLTIEDRNRIAAAENNGNESGVRELLKRIVQKENWFSAFLNVLRQTGNNELVQELTGSDCSESNAEIENLSQVDGPQVEEQ	IFIH1	Q9BYX4	MAD	0	4.1	FALSE
HTP0392A	Plasma	SciLifeLab peptide array	IFNA21*_HPRR3360011	MNADSILAVKKYFRRITLYLTEKKYSPCA	IFNA21*	P01568;P05014;P01567;P01566;P05015;P01571;P01570;P01569;P05013;P01562;P01563;P32881	MAD	0	1	FALSE
HTP0392A	Plasma	SciLifeLab peptide array	IFNA21*_HPRR3360040	AEAISVLHEVIQQTFNLFSTKDSSVA	IFNA21*	P01568;P05014;P01567;P01566;P05015;P01571;P01570;P01569;P05013;P01562;P01563;P32881	MAD	-1	-1	FALSE
HTP0392A	Plasma	SciLifeLab peptide array	IFNB1_HPRR2760323	ETIVENLLANVYHQINHLKTVLEEKLEKEDFTRGKLMSSLHLKRYYGRILHYLKAKEYSHCAWTIVRVEILRNFYFINR	IFNB1	P01574	MAD	0	1	FALSE
HTP0392A	Plasma	SciLifeLab peptide array	IFNB1_HPRR2760324	YNLLGFLQRSSNFQCQKLLWQLNGRLEYCLKDRMNFDIPEEIKQLQQFQKEDAALTIYEMLQNIFAIFRQDSSSTGWN	IFNB1	P01574	MAD	3	2	TRUE
HTP0392A	Plasma	SciLifeLab peptide array	IFNL1_HPRR3790181	PVPTSKPTTTGKGCHIGRFKSLSP	IFNL1	Q8IU54	MAD	-1	1.2	FALSE
HTP0392A	Plasma	SciLifeLab peptide array	IFNL3*_HPRR3260137	AVPVARLRGALPDARGCHIAQFKSLSPQE	IFNL3*	Q8IZI9;Q8IZJ0	MAD	-2	-0.9	FALSE
HTP0392A	Plasma	SciLifeLab peptide array	IFNW1*_HPRR3360041	MLLAQMRRISLFSCLKDRHDFRFPQE	IFNW1*	P05000;P01568;P05014;P01567;P01566;P05015;P01571;P01570;P01569;P05013;P01562;P01563;P32881	MAD	-1	2	FALSE
HTP0392A	Plasma	SciLifeLab peptide array	IFNW1_HPRR3780122	AWNMTLLDQLHTGLHQQLQHLETCLLQVVGEGESAGAISSPALTLRRYFQGIRVYLKEK	IFNW1	P05000	MAD	0	0	FALSE
HTP0392A	Plasma	SciLifeLab peptide array	IL17A_HPRR2760112	NPGCPNSEDKNFPRTVMVNLNIHNRNTNTNPKRSSDYYNRSTSPWNLHRNEDPERYPSVIWEAKCRHLGCIN	IL17A	Q16552	MAD	0	1	FALSE
HTP0392A	Plasma	SciLifeLab peptide array	IL17A_HPRR4290151	EILVLRREPPHCPNSFRLEKILVS	IL17A	Q16552	MAD	-1	0	FALSE
HTP0392A	Plasma	SciLifeLab peptide array	IL17F_HPRR2570223	RKIPKVGHTFFQKPESCPPVPGGSMKLDIGIINENQRVSMSRNIESRSTSPWNYTVTWDPNRYPSEVVQAQCRNLGCINAQGKE	IL17F	Q96PD4	MAD	5	23.4	FALSE
HTP0392A	Plasma	SciLifeLab peptide array	IL17F_HPRR4110234	QQETLVVRRKHQGCSVSFQLEKVLVTV	IL17F	Q96PD4	MAD	0	0	FALSE
HTP0392A	Plasma	SciLifeLab peptide array	IL22_HPRR1060056	PISSHCRLDKSNFQQPYITNRTFMLAKEASLADNNTDVRLIGEKLFHGVSMSERCYLMKQVLNFTLEEVLFPQSDRFQPYMQEVVPFLARLSNRLSTCHIEGDDLHIQRNVQKLKDTVKKLGESGEIKAIGELDLLFMSLRNA	IL22	Q9GZX6	MAD	1	2	FALSE
HTP0392A	Plasma	SciLifeLab peptide array	INS_HPRR380034	SHLVEALYLVCGERGFFYTPKTRREAEDLQVGQVELGGGPGAGSLQPLALEGSLQKRGIVEQCCTSICSLYQLENYC	INS	P01308	MAD	0	2	FALSE
HTP0392A	Plasma	SciLifeLab peptide array	INSM2_HPRR3450147	KHLSTHEAGSARALAPGFGSERGAPLAFACPLCGAHFPTADIREKHRLWHAVREELLLPALAGAPPETSGPSGPSDGSAQQIFSCKHCPSTF	INSM2	Q96T92	MAD	-1	53.4	FALSE
HTP0392A	Plasma	SciLifeLab peptide array	INSM2_HPRR3450148	AEGKENSRIERTADQHPQARDSSGADQHPDSAPRQGLQVLTHPEPPLPQGPYTEGVLGRRVPVPGSTSGGRGSEIFVCP	INSM2	Q96T92	MAD	-1	2	FALSE
HTP0392A	Plasma	SciLifeLab peptide array	KCND1_HPRR230897	SSQPVGPGSLLSSCCPRRAKRRAIRLANSTASVSRGSMQELDMLAGLRRSHAPQSRSSLNAKPHDSLDLNCDSRDFVAAIISIPTPPANTPDESQPSSPGGGGRAGSTLRNSSLGT	KCND1	Q9NSA2	MAD	0	1.1	FALSE
HTP0392A	Plasma	SciLifeLab peptide array	KCND1_HPRR230898	NTLDRYPDTLLGSSEKEFFYDADSGEYFFDRDPDMFRHVLNFYRTGRLHCPRQECIQAFDEELAFYGLVPELVGDCCLEEYRDRKKENAERLAEDEEAEQ	KCND1	Q9NSA2	MAD	-1	8.1	FALSE
HTP0392A	Plasma	SciLifeLab peptide array	KCND1_HPRR4320417	KTTCHEFTDELTFSEALGAVSPGGRTSRSTSVSSQPVGPGSLLSSCCPRRAKRRAIRLANSTASVSRGSM	KCND1	Q9NSA2	MAD	0	1	FALSE
HTP0392A	Plasma	SciLifeLab peptide array	KCNJ10_HPRR4030424	EFTPAISLSASGKYIADFSLFDQVVKVASPSGLRDSTVRYGDPEKLKLEESLREQAEKEGSALSVRISNV	KCNJ10	P78508	MAD	0	4	FALSE
HTP0392A	Plasma	SciLifeLab peptide array	KCNJ10_HPRR4030425	MTSVAKVYYSQTTQTESRPLMGPGIRRRRVLTKDGRSNVRMEHIADKRFLYLKDLWTTFIDMQWRY	KCNJ10	P78508	MAD	-2	10.9	FALSE
HTP0392A	Plasma	SciLifeLab peptide array	KCNJ10_HPRR4030426	VAVAHGDLLELDPPANHTPCVVQVHTLTG	KCNJ10	P78508	MAD	0	1.1	FALSE
HTP0392A	Plasma	SciLifeLab peptide array	KCNJ11_HPRR3690159	TVKVPTPLCTARQLDEDHSLLEALTLASARGPLRKRSVPMAKAKPKFSISPDSLS	KCNJ11	Q14654	MAD	0	0.1	FALSE
HTP0392A	Plasma	SciLifeLab peptide array	KCNJ11_HPRR4080108	YVLTRLAEDPAKPRYRARQRRARFVSKKGNCNVAH	KCNJ11	Q14654	MAD	-1	0	FALSE
HTP0392A	Plasma	SciLifeLab peptide array	KCNJ11_HPRR650098	RLCFMLRVGDLRKSMIISATIHMQVVRKTTSPEGEVVPLHQVDIPMENGVGGNSIFLVAPLIIYHVIDANSPLYDLAPSDLHHHQDLEIIVILEGVVETTGIT	KCNJ11	Q14654	MAD	0	0	FALSE
HTP0392A	Plasma	SciLifeLab peptide array	KEL_HPRR1952469	PRPCETSVCLDLRDHYLASGNTSVAPCTDFFSFACGRAKETNNSFQELATKNKNRLRRILEVQNSWHPGSGEEKAFQFYNSCMDTLAIEAAGTGPLRQVIEELGGWRISGKWT	KEL	P23276	MAD	0	1	FALSE
HTP0392A	Plasma	SciLifeLab peptide array	KEL_HPRR1952470	DQLKEMAPAIDWLSCLQATFTPMSLSPSQSLVVHDVEYLKNMSQLVEEMLLKQRDFLQSHMILGLVVTLSPALDSQFQEARRKLSQKLRELTEQPPMPARPRWMKCVEETGTFFEPTLAALFVREAFGPSTRSAAMKL	KEL	P23276	MAD	3	2	TRUE
HTP0392A	Plasma	SciLifeLab peptide array	LAD1_HPRR1350086	SPRTISFRMKPKKENSETTLTRSASMKLPDNTVKLGEKLERYHTAIRRSESVKSRGLPCTELFVAPVGVASKRHLFEKELAGQSRAEPASSRKENLRLSGVVTSRLNLWISRTQESGDQDPQEAQKASSATERTQWGQKSDSSL	LAD1	O00515	MAD	-1	1.1	FALSE
HTP0392A	Plasma	SciLifeLab peptide array	LAMP2_HPRR232315	LELNLTDSENATCLYAKWQMNFTVRYETTNKTYKTVTISDHGTVTYNGSICGDDQNGPKIAVQFGPGFSWIANFTKAASTYSIDSVSFSYNTGDNTTFPDAEDKGILTVDELLAIRIPLNDLFRCNSLSTLEKNDVVQHYWDVLVQA	LAMP2	P13473	MAD	-1	0.1	FALSE
HTP0392A	Plasma	SciLifeLab peptide array	LAMP2_HPRR232316	GTVSTNEFLCDKDKTSTVAPTIHTTVPSPTTTPTPKEKPEAGTYSVNNGNDTCLLATMGLQLNITQDKVASVININPNTTHSTGSCRSHTALLRLNSSTIKYLDFVFAVKNENRFYLKEVNISMYLVNGSVFSIANNNLSY	LAMP2	P13473	MAD	-2	-0.8	FALSE
HTP0392A	Plasma	SciLifeLab peptide array	LAMP2_HPRR2810012	ASTYSIDSVSFSYNTGDNTTFPDAEDKGILTVDELLAIRIPLNDLFRCNSLSTLEKNDVVQHYWDVLV	LAMP2	P13473	MAD	0	6.1	FALSE
HTP0392A	Plasma	SciLifeLab peptide array	LAMP2_HPRR2810014	LGSSYMCNKEQTVSVSGAFQINTFDLRVQPFNVTQGKYSTAQDCSADDDNF	LAMP2	P13473	MAD	-1	-1	FALSE
HTP0392A	Plasma	SciLifeLab peptide array	LBR_HPRR3410125	MPSRKFADGEVVRGRWPGSSLYYEVEILSHDSTSQLYTVKYKDGTELELKENDIKPLTSFRQRKGGSTSSS	LBR	Q14739	MAD	0	1	FALSE
HTP0392A	Plasma	SciLifeLab peptide array	LBR_HPRR3410127	EARREVEVKLTPLILKPFGNSISRYNGEPEHIERNDAPHKNTQEKFNLSQESSYIATQYSLRPRREEVKLKEIDSKEEKYVAKELAVRTF	LBR	Q14739	MAD	0	23.1	FALSE
HTP0392A	Plasma	SciLifeLab peptide array	LRP4_HPRR1770061	IQRVDKYSGRNKETVLANVEGLMDIIVVSPQRQTGTNACGVNNGGCTHLCFARASDFVCACPDEPDSQPCSLVPGLVPPAPRATGMSEKSPVLPNTPPTTLYSSTTRTRTSLEEVEGRCSERDARLGLCARSNDAVPAAP	LRP4	O75096	MAD	0	15.1	FALSE
HTP0392A	Plasma	SciLifeLab peptide array	LRP4_HPRR1770062	PGMGNLTYSNPSYRTSTQEVKIEAIPKPAMYNQLCYKKEGGPDHNYTKEKIKIVEGICLLSGDDAEWDDLKQLRSSRGGLLRDHVCMKTDTVSIQASSGSLDDTETEQLLQEEQSECSSVH	LRP4	O75096	MAD	1	3.3	FALSE
HTP0392A	Plasma	SciLifeLab peptide array	MARS_HPRR430074	FVLQDTVEQLRCEHCARFLADRFVEGVCPFCGYEEARGDQCDKCGKLINAVELKKPQCKVCRSCPVVQSSQHLFLDLPKLEKRLEEWLGRTLPGSDWTPNAQFITRSWLRDGLKPRCITRDLKWGTPVPLEGFEDKVFYVWFD	MARS	P56192	MAD	5	4	TRUE
HTP0392A	Plasma	SciLifeLab peptide array	MBP_HPRR2850726	ASTNSETNRGESEKKRNLGELSRTTSEDNEVFGEADANQNNGTSSQDTAVTDSKRTADPKNAWQDAHPADPGSRPHLIRLFSRDAP	MBP	P02686	MAD	-1	33.3	FALSE
HTP0392A	Plasma	SciLifeLab peptide array	MBP_HPRR2850727	DENPVVHFFKNIVTPRTPPPSQGKGRGLSLSRFSWGAEGQRPGFGYGGRASDYKSAHKGFKGVDAQGTLSKIFKLGGRDSRSGSPM	MBP	P02686	MAD	-1	0	FALSE
HTP0392A	Plasma	SciLifeLab peptide array	MORC3_HPRR2280025	NNPDPQFRNCEVPEEPEDEDLVHPTYEKTYKKTNKEKFRIRQPEMIPRINAELLFRPTALSTPSFSSPKESVPRRHLSEGTNSYATRLLNNHQVPPQSEPESNSLKRR	MORC3	Q14149	MAD	-1	4	FALSE
HTP0392A	Plasma	SciLifeLab peptide array	MORC3_HPRR2890077	GKKGTRIIIWNLRSYKNATEFDFEKDKYDIRIPEDLDEITGKKGYKKQERMDQIAPESDYSLRAYCSILYLKPRMQIILR	MORC3	Q14149	MAD	2	2	FALSE
HTP0392A	Plasma	SciLifeLab peptide array	MPO_HPRR280052	SRDHGLPGYNAWRRFCGLPQPETVGQLGTVLRNLKLARKLMEQYGTPNNIDIWMGGVSEPLKRKGRVGPLLACIIGTQFRKLRDGDRFWWENEGVFSMQQRQALAQISLPRIICDNTGITTVSKNNIFMSNSYPRDFVNC	MPO	P05164	MAD	0	1	FALSE
HTP0392A	Plasma	SciLifeLab peptide array	MPO_HPRR4160030	GAAPAVLGEVDTSLVLSSMEEAKQLVDKAYKERRESIKQRLR	MPO	P05164	MAD	-1	5.2	FALSE
HTP0392A	Plasma	SciLifeLab peptide array	MUSK_HPRR2750111	YYGMAHEEVIYYVRDGNILSCPENCPVELYNLMRLCWSKLPADRPSFTSIHRILERMCERAEGTVSV	MUSK	O15146	MAD	3	2	TRUE
HTP0392A	Plasma	SciLifeLab peptide array	MUSK_HPRR2750113	PKAPVITTPLETVDALVEEVATFMCAVESYPQPEISWTRNKILIKLFDTRYSIRENGQLLTILSVEDSDDGIYCCTANNGVGGAVESCGALQVKMKPKITR	MUSK	O15146	MAD	1	1	FALSE
HTP0392A	Plasma	SciLifeLab peptide array	MUSK_HPRR290005	RGEVCNAVLAKDALVFLNTSYADPEEAQELLVHTAWNELKVVSPVCRPAAEALLCNHIFQECSPGVVPTPIPICREYCLAVKELFCAKEWLVMEEKTHRGLYRSEMHLLSVPECSKLPSMHWDPTACARLPHLAFPPMTSSK	MUSK	O15146	MAD	-2	-1	FALSE
HTP0392A	Plasma	SciLifeLab peptide array	MUSK_HPRR4160302	RESAAVTLTTLPSELLLDRLHPNPMYQRMPLLLNPKLLSLEYPRNNIEYVRDIGEGAFGRVFQARAPGLLP	MUSK	O15146	MAD	0	2	FALSE
HTP0392A	Plasma	SciLifeLab peptide array	MUSK_HPRR4160303	RIHNVQKEDAGQYRCVAKNSLGTAYSKVVKLEVEVFARILRAPESHNVTFGSFVTLHCTATGIPVPTITWIENGNA	MUSK	O15146	MAD	1	3.1	FALSE
HTP0392A	Plasma	SciLifeLab peptide array	MYH10_HPRR3460173	RQLDDATEANEGLSREVSTLKNRLRRGGPISFSSSRSGRRQLHLEGASLELSDDDTESKTSDVNETQPPQ	MYH10	P35580	MAD	-2	6.1	FALSE
HTP0392A	Plasma	SciLifeLab peptide array	MYH10_HPRR3890677	VQELHAKVSEGDRLRVELAEKASKLQNELDNVSTLLEEAEKKGIKFAKDA	MYH10	P35580	MAD	36	63.6	FALSE
HTP0392A	Plasma	SciLifeLab peptide array	MYH11_HPRR1720012	VTVLKKALDEETRSHEAQVQEMRQKHAQAVEELTEQLEQFKRAKANLDKNKQTLEKENADLAGELRVLGQAKQEVEHKKKKLEAQVQELQSKCSDGE	MYH11	P35749	MAD	2	3	FALSE
HTP0392A	Plasma	SciLifeLab peptide array	MYH11_HPRR1720013	LQEETRQKLNVSTKLRQLEEERNSLQDQLDEEMEAKQNLERHISTLNIQLSDSKKKLQDFASTVEALEEGKKRFQKEIENLTQQYEEK	MYH11	P35749	MAD	5	12	FALSE
HTP0392A	Plasma	SciLifeLab peptide array	MYH13_HPRR4080014	DNKEMYVKGMIQTRENDKVIVKTLDDRMLTLNNDQVFPMN	MYH13	Q9UKX3	MAD	0	48.5	FALSE
HTP0392A	Plasma	SciLifeLab peptide array	MYH14_HPRR3830109	GAGEQLKADLLLEPCSHYRFLTNGPSSSPGQERELFQETLESLRVLGFSHEE	MYH14	Q7Z406	MAD	1	4.1	FALSE
HTP0392A	Plasma	SciLifeLab peptide array	MYH14_HPRR4290008	FTTRTVRQVFRLEEGVASDEEAEEAQPGSGPSPEPEGSPP	MYH14	Q7Z406	MAD	185	0	TRUE
HTP0392A	Plasma	SciLifeLab peptide array	MYH15_HPRR2960342	KMERERADLTQDLADLNERLEEVGGSSLAQLEITKKQETKFQKLHRDMEEATLHFETTSASLKKRH	MYH15	Q9Y2K3	MAD	-1	5	FALSE
HTP0392A	Plasma	SciLifeLab peptide array	MYH15_HPRR2960343	LGEAAAFLRRSEAELLLLQATALDGKKKCWIPDGENAYIEAEVKGSEDDGTVIVETADGESLSIKEDKIQQMNPPEFE	MYH15	Q9Y2K3	MAD	-1	1.2	FALSE
HTP0392A	Plasma	SciLifeLab peptide array	MYH3_HPRR2500234	IEAQNQPFDAKTYCFVVDSKEEYAKGKIKSSQDGKVTVETEDNRTLVVKPEDVYAMNPPKFDRIEDMAML	MYH3	P11055	MAD	2	6.2	FALSE
HTP0392A	Plasma	SciLifeLab peptide array	MYH6*_HPRR141341	QVEEDKVNSLSKSKVKLEQQVDDLEGSLEQEKKVRMDLERAKRKLEGDLKLTQESIMDLENDKLQLEEKLKKKEFDINQQNSKIEDEQVLALQLQKKLKENQARIEELEEELEAERTARAKVEKLRSDLSRELEEISERLEEA	MYH6*	P13533;P12883;P13535;Q9Y623;P12882;Q9UKX2	MAD	0	10.3	FALSE
HTP0392A	Plasma	SciLifeLab peptide array	MYH6*_HPRR141342	ALRKKHADSVAELGEQIDNLQRVKQKLEKEKSEFKLELDDVTSNMEQIIKAKANLEKMCRTLEDQMNEHRSKAEETQRSVNDLTSQRAKLQTENGELSRQLDEKEALISQLTRGKLTYTQQLEDLKRQLEEEVKAKNALAHALQS	MYH6*	P13533;P12883	MAD	0	9.1	FALSE
HTP0392A	Plasma	SciLifeLab peptide array	MYH6*_HPRR4370083	LDKKQRNFDKILAEWKQKCEETHAELEA	MYH6*	P13533;P12883;Q9UKX3;P13535;Q9Y623;P12882;Q9UKX2;P11055	MAD	-1	2	FALSE
HTP0392A	Plasma	SciLifeLab peptide array	MYH7B_HPRR3300035	KVHTIPWDGKKRVWVPDEQDAYVEAEVKSEATGGRVTVETKDQKVLMVREAELQPMNPPRFDLLEDMAMM	MYH7B	A7E2Y1	MAD	20	18.3	TRUE
HTP0392A	Plasma	SciLifeLab peptide array	MYH7B_HPRR3300036	DMSGNKRGSRASCPHRGAECLLPWAALNLQGFQLLLLHPSATAMMDVSELGESARYLRQGYQEMTK	MYH7B	A7E2Y1	MAD	1	1	FALSE
HTP0392A	Plasma	SciLifeLab peptide array	MYH9_HPRR350143	REQEVNILKKTLEEEAKTHEAQIQEMRQKHSQAVEELAEQLEQTKRVKANLEKAKQTLENERGELANEVKVLLQGKGDSEHKRKKVEAQLQELQVKFNEGERVRTELADKVTKLQVELDNVTGLLSQSDSKSSKLTKDF	MYH9	P35579	MAD	-2	2.1	FALSE
HTP0392A	Plasma	SciLifeLab peptide array	NARS_HPRR3120288	RLEDLVCDVVDRILKSPAGSIVHELNPNFQPPKRPFKRMNYSDAIVWLKEHDVKKEDGTFYEFGEDIPEAPERLMTDTINEPILLCRFPVEIK	NARS	O43776	MAD	0	3.1	FALSE
HTP0392A	Plasma	SciLifeLab peptide array	NARS_HPRR3120291	GALEGYRGQRVKVFGWVHRLRRQGKNLMFLVLRDGTGYLQCVLADELCQCYNGVLLSTESSVAVYGMLNLTPKGKQAPGGHELSCDFWELIG	NARS	O43776	MAD	4	3	TRUE
HTP0392A	Plasma	SciLifeLab peptide array	NARS2_HPRR370132	LAEFYMIEAEISFVDSLQDLMQVIEELFKATTMMVLSKCPEDVELCHKFIAPGQKDRLEHMLKNNFLIISYTEAVEILKQASQNFTFTPEWGADLRTEHEKYLVKHCGNIPVFVINYPLTLKPFYMRDNEDGPQHTVAAVDLLVPGVG	NARS2	Q96I59	MAD	-2	-1	FALSE
HTP0392A	Plasma	SciLifeLab peptide array	NCOA2_HPRR3760125	SPRMAHTQSPMMQQSQANPAYQAPSDINGWAQGNMGGNSMFSQQSPPHFGQQANTSMYSNNMNINVSMATNTGGMSSMNQMTGQISMTSVT	NCOA2	Q15596	MAD	1	1.1	FALSE
HTP0392A	Plasma	SciLifeLab peptide array	NCOA2_HPRR3760127	PKLERLDSKTDPASNTKLIAMKTEKEEMSFEPGDQPGSELDNLEEILDDLQNSQLPQLFPDTRPGAPAGSV	NCOA2	Q15596	MAD	-1	38.4	FALSE
HTP0392A	Plasma	SciLifeLab peptide array	NKX6-1_HPRR3060095	PLGTHNPGGLKPPATGGLSSLGSPPQQLSAATPHGINDILSRPSM	NKX6-1	P78426	MAD	0	2	FALSE
HTP0392A	Plasma	SciLifeLab peptide array	NLRP5_HPRR3280206	LLPESFLIVTVRDVGTEKLKSEVVSPRYLLVRGISGEQRIHLLLERGIGEHQKTQGLRAIMNNRELLDQCQVPAVGSLICVALQLQDVVGESVAPFNQTLTGLHAAFVFHQLTPR	NLRP5	P59047	MAD	0	0	FALSE
HTP0392A	Plasma	SciLifeLab peptide array	NUP210_HPRR2110161	DLIHDIQIVSTTRELYLEDSPLELKIQALDSEGNTFSTLAGLVFEWTIVKDSEADRFSDSHNALRILTFLESTYIPPSYISEMEKAAKQGDTILVSGMKTGSSKLKARIQEAVYKNVRPAEVRLLILENILLNPAYDVYLMVGTSIHYK	NUP210	Q8TEM1	MAD	3	2.1	TRUE
HTP0392A	Plasma	SciLifeLab peptide array	NUP210_HPRR2110162	TFTVHFHDNSGDVFHAHSSVLNFATNRDDFVQIGKGPTNNTCVVRTVSVGLTLLRVWDAEHPGLSDFMPLPVLQAISPELSGAMVVGDVLCLATVLTSLEGLSGTWSSSANSILHIDPKTGVAV	NUP210	Q8TEM1	MAD	-1	-1	FALSE
HTP0392A	Plasma	SciLifeLab peptide array	NUP210_HPRR3890586	HLHPIQTSFQEATASKVIVAVGDRSSNLRGECTPTQREVIQALHPETLISCQSQFKPAVFDFPSQDVFTVEPQFDTALGQYFCSITMHRLTDKQRKHL	NUP210	Q8TEM1	MAD	1	5.1	FALSE
HTP0392A	Plasma	SciLifeLab peptide array	NUP62_HPRR1430027	GGFTFGTAKTATTTPATGFSFSTSGTGGFNFGAPFQPATSTPSTGLFSLATQTPATQTTGFTFGTATLASGGTGFSLGIGASKLNLSNTAATPAMANPSGFGLGSSNLTNAISSTVTSSQGTAPTGFVFGPST	NUP62	P37198	MAD	0	2	FALSE
HTP0392A	Plasma	SciLifeLab peptide array	OGDH_HPRR2440198	LRTCAAKLRPLTASQTVKTFSQNRPAAARTFQQIRCYSAPVAAEPFLSGTSSNYVEEMYCAWLENPKSV	OGDH	Q02218	MAD	0	0.1	FALSE
HTP0392A	Plasma	SciLifeLab peptide array	OGDH_HPRR2440199	FRNTNAGAPPGTAYQSPLPLSRGSLAAVAHAQSLVEAQPNVDKLVEDHLAVQSLIRAYQIRGHHVAQ	OGDH	Q02218	MAD	0	1	FALSE
HTP0392A	Plasma	SciLifeLab peptide array	PAGE2B*_HPRR3340273	QGIAPSGEIENEGAPAVQGPDMEAFQQELALLKIEDEPGDGPDVREGIMPTFDLTKVLEAGDA	PAGE2B*	Q5JRK9;Q7Z2X7;Q96GU1	MAD	-2	6.3	FALSE
HTP0392A	Plasma	SciLifeLab peptide array	PAGE2B*_HPRR3340274	RSQSSERGNDQESSQPVGSVIVQEPTEEKRQEEEPPTDN	PAGE2B*	Q5JRK9;Q7Z2X7;Q96GU1	MAD	-1	14.1	FALSE
HTP0392A	Plasma	SciLifeLab peptide array	PAGE5_HPRR3920178	PWAGNRGWAGTREEVRDMSEHVTRSQS	PAGE5	Q96GU1	MAD	-1	12.3	FALSE
HTP0392A	Plasma	SciLifeLab peptide array	PDHA1*_HPRR3340143	NDATFEIKKCDLYLLEEGPPVTTVLTR	PDHA1*	P08559;P29803	MAD	2	2	FALSE
HTP0392A	Plasma	SciLifeLab peptide array	PDHA1*_HPRR3340144	ILAELTGRRGGCAKGKGGSMHMYTKNFYGGNGIVG	PDHA1*	P08559;P29803	MAD	0	1	FALSE
HTP0392A	Plasma	SciLifeLab peptide array	PDHA1*_HPRR3340146	YCRSGKGPILMELQTYRYHGHSMSDPGVS	PDHA1*	P08559;P29803	MAD	0	0	FALSE
HTP0392A	Plasma	SciLifeLab peptide array	PDHX_HPRR3050163	PAARNILEKHSLDASQGTATGPRGIFTKEDALKLVQLKQTGKITESRPTPAPTATPTAPSPLQATAGPSYPRPVIPPVSTPGQPNAVGTFTEI	PDHX	O00330	MAD	-2	0	FALSE
HTP0392A	Plasma	SciLifeLab peptide array	PDHX_HPRR3050164	DASDDGILAKIVVEEGSKNIRLGSLIGLIVEEGEDWKHVEIPKDVGPPPPVSKPSEPRPSPEPQISIPVKKEHIPGTLRFRLS	PDHX	O00330	MAD	28	22.4	TRUE
HTP0392A	Plasma	SciLifeLab peptide array	PDX1_HPRR3930003	DISPYEVPPLADDPAVAHLHHHLPAQLALPHPPAGPFPEGAEPGVLEEPNRVQLPFPWMKSTKA	PDX1	P52945	MAD	3	30.2	FALSE
HTP0392A	Plasma	SciLifeLab peptide array	PLP1_HPRR4180637	IYFNTWTTCQSIAFPSKTSASIGSLCADARMYGVLPWNAFPGK	PLP1	P60201	MAD	0	0	FALSE
HTP0392A	Plasma	SciLifeLab peptide array	PPY_HPRR2500214	EPVYPGDNATPEQMAQYAADLRRYINMLTRPRYGKRHKEDTLAFSEWGSPHAAVPRELSPLDL	PPY	P01298	MAD	-1	2	FALSE
HTP0392A	Plasma	SciLifeLab peptide array	PROC_HPRR330193	DQCLVLPLEHPCASLCCGHGTCIDGIGSFSCDCRSGWEGRFCQREVSFLNCSLDNGGCTHYCLEEVGWRRCSCAPGYKLGDDLLQCHPAVKFPCGRPWKRMEKKRSHLKRDTEDQEDQVDPRLIDGKMTRRGDSPWQVVLLD	PROC	P04070	MAD	2	2	FALSE
HTP0392A	Plasma	SciLifeLab peptide array	PROC_HPRR330194	AHCMDESKKLLVRLGEYDLRRWEKWELDLDIKEVFVHPNYSKSTTDNDIALLHLAQPATLSQTIVPICLPDSGLAERELNQAGQETLVTGWGYHSSREKEAKRNRTFVLNFIKIPVVPHNECSEVMSNMVSENMLCAGI	PROC	P04070	MAD	-1	4	FALSE
HTP0392A	Plasma	SciLifeLab peptide array	PRPH_HPRR3070455	FSSTSYRRTFGPPPSLSPGAFSYSSSSRFSSSRLLGSASPSSSVRLGSFRSPRAGAGALLRLPSERLDFSMAEALNQEFLATRSNEKQEL	PRPH	P41219	MAD	0	0	FALSE
HTP0392A	Plasma	SciLifeLab peptide array	PRPH_HPRR3890753	EESRISVPVHSFASLNIKTTVPEVEPPQDSHSRKTVLIKTI	PRPH	P41219	MAD	14	179.2	FALSE
HTP0392A	Plasma	SciLifeLab peptide array	PRTN3_HPRR400125	PTQQHFSVAQVFLNNYDAENKLNDILLIQLSSPANLSASVATVQLPQQDQPVPHGTQCLAMGWGRVGAHDPPAQVLQELNVTVVTFFCRPHNICTFVPRRKAGICFGDSGGPLICDGI	PRTN3	P24158	MAD	3	3	FALSE
HTP0392A	Plasma	SciLifeLab peptide array	PSMA3_HPRR4320279	TGYDLSASTFSPDGRVFQVEYAMKAVENSSTAIGIRCKDGVVFGVEKLVLSKLYEEGSNKRLFNVDRHVGMAVAGLLADAR	PSMA3	P25788	MAD	1	1	FALSE
HTP0392A	Plasma	SciLifeLab peptide array	PTGER3_HPRR1960004	MKETRGYGGDAPFCTRLNHSYTGMWAPERSAEARGNLTRPPGSGEDCGSVS	PTGER3	P43115	MAD	0	2	FALSE
HTP0392A	Plasma	SciLifeLab peptide array	PTGER3_HPRR4160226	RKILLRKFCQIRYHTNNYASSSTSLPCQCSSTLMWSDHLER	PTGER3	P43115	MAD	0	2	FALSE
HTP0392A	Plasma	SciLifeLab peptide array	PTGS1_HPRR330080	MPDSFKVGSQEYSYEQFLFNTSMLVDYGVEALVDAFSRQIAGRIGGGRNMDHHILHVAVDVIRESREMRLQPFNEYRKRFGMKPYTSFQELVGEKEMAAELEELYGDIDALEFYPGLLLEKCHPNSIFGESMIEIGAPFSLKGLLGN	PTGS1	P23219	MAD	0	6	FALSE
HTP0392A	Plasma	SciLifeLab peptide array	PTPRN_HPRR1350005	VSSEPPKAARPPVTPVLLEKKSPLGQSQPTVAGQPSARPAAEEYGYIVTDQNVVGPALTFRIRHNEQNLSLADVTQQAGLVKSELEAQTGLQILQTGVGQREEAAAVLPQTAHSTSPM	PTPRN	Q16849	MAD	6	1.1	TRUE
HTP0392A	Plasma	SciLifeLab peptide array	PTPRN_HPRR4160144	QVTSPVLQRLQGVLRQLMSQGLSWHDDLTQYVISQEMERIPRLRPPEPRPRDRSGLAPKRPGPAGELLLQDIPTGSAPAAQHRL	PTPRN	Q16849	MAD	-2	2	FALSE
HTP0392A	Plasma	SciLifeLab peptide array	PTPRN2_HPRR1350080	QDDDDRLYQEVHRLSATLGGLLQDHGSRLLPGALPFARPLDMERKKSEHPESSLSSEEETAGVENVKSQTYSKDLLGQQPHSEPGAAAFGELQNQMPGPSKEEQSLPAGAQ	PTPRN2	Q92932	MAD	-1	3.1	FALSE
HTP0392A	Plasma	SciLifeLab peptide array	PTPRN2_HPRR1350081	RFSESILTYVAHTSALTYPPGSRTQLREDLLPRTLGQLQPDELSPKVDSGVDRHHLMAALSAYAAQRPPAPPGEGSLEPQYLLRAPSRMPRPLLAPAAPQKWPSPLGDSEDPSST	PTPRN2	Q92932	MAD	6	11.1	FALSE
HTP0392A	Plasma	SciLifeLab peptide array	RAB3D*_HPRR4320449	AVQDWATQIKTYSWDNAQVILVGNKCD	RAB3D*	O95716;P20336;P20337;Q96E17	MAD	1	1	FALSE
HTP0392A	Plasma	SciLifeLab peptide array	RAB3D_HPRR2260029	EASAKENINVKQVFERLVDVICEKMNESLEPSSSSGSNGKGPAVGDAPAPQPSSCSC	RAB3D	O95716	MAD	4	33	FALSE
HTP0392A	Plasma	SciLifeLab peptide array	RAPSN_HPRR3050586	TKVLEKSSDLMGRFRVLGCLVTAHSEMGRYKEMLKFAVVQIDTARELEDADFLLESYLNLARSNEKLCEFHKTISYCKTC	RAPSN	Q13702	MAD	2	2	FALSE
HTP0392A	Plasma	SciLifeLab peptide array	RAPSN_HPRR3050587	SLSMGNAFLGLSVFQKALESFEKALRYAHNNDDAMLECRVCCSLGSFYAQVKDYEKALFFPCKAAELVNNYGKGWSLKYRAMS	RAPSN	Q13702	MAD	1	0	TRUE
HTP0392A	Plasma	SciLifeLab peptide array	RAPSN_HPRR3050588	MECCEESMKIALQHGDRPLQALCLLCFADIHRSRGDLETAFPRYDSAMSIMTEIGNRLGQVQALLGVAKCWVARKALDKALDAIE	RAPSN	Q13702	MAD	1	1	FALSE
HTP0392A	Plasma	SciLifeLab peptide array	RARS_HPRR620009	VVLGEDKKKFKTRSGETVRLMDLLGEGLKRSMDKLKEKERDKVLTAEELNAAQTSVAYGCIKYADLSHNRLNDYIFSFDKMLDDRGNTAAYLLYAFTRIRSIARLANIDEEMLQKAARETKILLDHEKEWKLGRCILRFPEI	RARS	P54136	MAD	0	2	FALSE
HTP0392A	Plasma	SciLifeLab peptide array	REG1B*_HPRR3320001	TDDFNVWIGLHDPKKNRRWHWSSGSLVSYKSWG	REG1B*	P48304;P05451	MAD	0	3.1	FALSE
HTP0392A	Plasma	SciLifeLab peptide array	REG1B*_HPRR3320002	PEGTNAYRSYCYYFNEDRETWVDADLYCQNMNSGNLVSV	REG1B*	P48304;P05451	MAD	0	13.8	FALSE
HTP0392A	Plasma	SciLifeLab peptide array	RHD*_HPRR3980079	LNLKIWKAPHVAKYFDDQVFWKFPHLAVGF	RHD*	Q02161;P18577	MAD	-1	2	FALSE
HTP0392A	Plasma	SciLifeLab peptide array	RHD*_HPRR4080111	AILLDGFLSQFPSGKVVITLFSIRL	RHD*	Q02161;P18577	MAD	2	2	FALSE
HTP0392A	Plasma	SciLifeLab peptide array	RHD_HPRR2870121	VGFSKSIQEKQGLFKNKTTSSHCCLHLYVRNAHDSKVSNVRAGTGVRENGVESFLCHSLRRISPFIMHC	RHD	Q02161	MAD	0	1.1	FALSE
HTP0392A	Plasma	SciLifeLab peptide array	RPL6_HPRR3720353	VPRKLLSHGKKPFSQHVRKLRASITPGTILIILTGRHRGKRVVFLKQLASGLLL	RPL6	Q02878	MAD	-2	-1	FALSE
HTP0392A	Plasma	SciLifeLab peptide array	RPL6_HPRR580003	LRASITPGTILIILTGRHRGKRVVFLKQLASGLLLVTGPLVLNRVPLRRTHQKFVIATSTKIDISNVKIPKHLTDAYFKKKKLRKPRHQEGEIFDTEKEKYEITEQRKIDQKAVDSQILPKIKAIPQLQGYLRSVFALTNGIYPH	RPL6	Q02878	MAD	9	7	TRUE
HTP0392A	Plasma	SciLifeLab peptide array	RPLP0_HPRR580058	VVLMGKNTMMRKAIRGHLENNPALEKLLPHIRGNVGFVFTKEDLTEIRDMLLANKVPAAARAGAIAPCEVTVPAQNTGLGPEKTSFFQALGIT	RPLP0	P05388	MAD	0	2.1	FALSE
HTP0392A	Plasma	SciLifeLab peptide array	RPLP1_HPRR580030	MASVSELACIYSALILHDDEVTVTEDKINALIKAAGVNVEPFWPGLFAKALANVNIGSLICNVGAGGPAPAAGAAPAGGPAPSTAAAPAEEKKVEAKKEESEESDDDMG	RPLP1	P05386	MAD	0	1	FALSE
HTP0392A	Plasma	SciLifeLab peptide array	RPLP2_HPRR3830386	MRYVASYLLAALGGNSSPSAKDIKKILDSVGIEADDDRLNKVIS	RPLP2	P05387	MAD	0	0	FALSE
HTP0392A	Plasma	SciLifeLab peptide array	RPLP2_HPRR4290615	SELNGKNIEDVIAQGIGKLASVPAGGAVAVSAAPGSAAP	RPLP2	P05387	MAD	0	5.3	FALSE
HTP0392A	Plasma	SciLifeLab peptide array	RYR1_HPRR3420763	REFLHNNLHLQGKVEGSPSLRWQMALYRGVPGREEDADDPEKIVRRVQEVSAVLYYLDQTEHPYKSKK	RYR1	P21817	MAD	-1	0	FALSE
HTP0392A	Plasma	SciLifeLab peptide array	SAE1_HPRR3280030	NSIKFFTGDVFGYHGYTFANLGEHEFVEEKTKVAKVSQGVEDGPDTKRAKLDSSETTMVKKKVVFCPVKEALE	SAE1	Q9UBE0	MAD	1	3	FALSE
HTP0392A	Plasma	SciLifeLab peptide array	SAE1_HPRR3280031	KGLTMLDHEQVTPEDPGAQFLIRTGSVGRNRAEASLERAQNLNPMVDVKVDTEDIEKKPESFFTQFDAVCLTCCSRD	SAE1	Q9UBE0	MAD	1	23.4	FALSE
HTP0392A	Plasma	SciLifeLab peptide array	SARS_HPRR1390005	NVLSFDDLTADALANLKVSQIKKVRLLIDEAILKCDAERIKLEAERFENLREIGNLLHPSVPISNDEDVDNKVERIWGDCTVRKKYSHVDLVVMVDGFEGEKGAVVAGSRGYFLKGVLVFLEQALIQYAL	SARS	P49591	MAD	1	3	FALSE
HTP0392A	Plasma	SciLifeLab peptide array	SARS_HPRR4160317	GSRGYIPIYTPFFMRKEVMQEVAQLSQFDEELYKVIGKGSEKSDDNSYDEKYLIATSEQPIAALHRDEWLRPEDLPIKYAGLSTCFRQ	SARS	P49591	MAD	1	5.1	FALSE
HTP0392A	Plasma	SciLifeLab peptide array	SIAH2_HPRR1450566	QPQHTPSPQHHELTSLFECPVCFDYVLPPILQCQAGHLVCNQCRQKLSCCP	SIAH2	O43255	MAD	1	2	FALSE
HTP0392A	Plasma	SciLifeLab peptide array	SIAH2_HPRR4040718	TGPSANKPCSKQPPPQPQHTPSPA	SIAH2	O43255	MAD	161	158.8	TRUE
HTP0392A	Plasma	SciLifeLab peptide array	SLC14A1_HPRR4030315	MNGRSLIGGAGDARHGPVWKDPFGTKAGDAARRGIARLSLALADGSQEQE	SLC14A1	Q13336	MAD	-1	1	FALSE
HTP0392A	Plasma	SciLifeLab peptide array	SLC14A1_HPRR4030316	GHYNPFFPAKLVIPITTAPNISWSDLSALELLKSIPVGVGQI	SLC14A1	Q13336	MAD	-1	1	FALSE
HTP0392A	Plasma	SciLifeLab peptide array	SLC26A4_HPRR2440187	FGLLTVVLRVQFPSWNGLGSIPSTDIYKSTKNYKNIEEPQGVKILRFSSPIFYGNVDGFKKCIKSTVGFDAIRVYNKRLKALRK	SLC26A4	O43511	MAD	-2	-1	FALSE
HTP0392A	Plasma	SciLifeLab peptide array	SLC26A4_HPRR2440190	IEKLEQCGFFDDNIRKDTFFLTVHDAILYLQNQVKSQEGQGSILETITLIQDCKDTLELIETELTEEELDVQDE	SLC26A4	O43511	MAD	-2	-1	FALSE
HTP0392A	Plasma	SciLifeLab peptide array	SLC26A4_HPRR3870179	QLPEYSCSYMVSRPVYSELAFQQQHERRLQERKTLRESLAKCCSCSRKRAFGVLKTLVPILE	SLC26A4	O43511	MAD	2	2	FALSE
HTP0392A	Plasma	SciLifeLab peptide array	SLC30A8_HPRR2180114	MEFLERTYLVNDKAAKMYAFTLESVELQQKPVNKDQCPRERPEELESGGMYHCHSGSKPTEKGANEYAYAKWK	SLC30A8	Q8IWU4	MAD	12	19.2	FALSE
HTP0392A	Plasma	SciLifeLab peptide array	SLC30A8_HPRR3970264	LHQRCLGHNHKEVQANASVRAA	SLC30A8	Q8IWU4	MAD	0	1	FALSE
HTP0392A	Plasma	SciLifeLab peptide array	SLC30A8_HPRR3970265	LSAHVATAASRDSQVVRREIAKALSKSFTMHSLTIQMESPVDQDPDCLFCEDPCD	SLC30A8	Q8IWU4	MAD	6	6	FALSE
HTP0392A	Plasma	SciLifeLab peptide array	SNRPB*_HPRR400172	TFKAFDKHMNLILCDCDEFRKIKPKNAKQPEREEKRVLGLVLLRGENLVSMTVEGPPPKDTGIARVPLAGAAGGPGVGRAAGRGVPAGVPIPQ	SNRPB*	P14678;P63162	MAD	2	2	FALSE
HTP0392A	Plasma	SciLifeLab peptide array	SNRPB*_HPRR4320676	QAPAGLAGPVRGVGGPSQQVMTPQGRGT	SNRPB*	P14678;P63162	MAD	0	1.1	FALSE
HTP0392A	Plasma	SciLifeLab peptide array	SNRPD1_HPRR3120151	SMNTHLKAVKMTLKNREPVQLETLSIRGNNIRYFILPDSLPLDTLLVDVEPKVKSKKREAVAGRGR	SNRPD1	P62314	MAD	-1	1.1	FALSE
HTP0392A	Plasma	SciLifeLab peptide array	SNRPD1_HPRR4000134	MKLVRFLMKLSHETVTIELKNGTQVHGTITGVDVS	SNRPD1	P62314	MAD	4	10.1	FALSE
HTP0392A	Plasma	SciLifeLab peptide array	SNRPD2_HPRR3250190	GKGKKKSKPVNKDRYISKMFLRGDSVIVVLRNPLIAGK	SNRPD2	P62316	MAD	-1	0	FALSE
HTP0392A	Plasma	SciLifeLab peptide array	SNRPD2_HPRR3250191	REEEEFNTGPLSVLTQSVKNNTQVLINCRNNKKLLGRVKAFDRHCNMVLENVKEMWTE	SNRPD2	P62316	MAD	0	1	FALSE
HTP0392A	Plasma	SciLifeLab peptide array	SNRPD3_HPRR220243	KVLHEAEGHIVTCETNTGEVYRGKLIEAEDNMNCQMSNITVTYRDGRVAQLEQVYIRGSKIRFLILPDMLKNAPMLKSMKNKNQGSGAGRGKAAILKAQVAARGRGRGMGRGNI	SNRPD3	P62318	MAD	-1	1.1	FALSE
HTP0392A	Plasma	SciLifeLab peptide array	SNRPF_HPRR1720018	LNPKPFLNGLTGKPVMVKLKWGMEYKGYLVSVDGYMNMQLANTEEYIDGALSGHLGEVLIRCNNVLYIRGVEEEEEDG	SNRPF	P62306	MAD	12	9.1	TRUE
HTP0392A	Plasma	SciLifeLab peptide array	SNRPG_HPRR3400115	MSKAHPPELKKFMDKKLSLKLNGGRHVQGILRGFDPFMNLVIDECVEMATSGQQNNIGMVVIRGNSIIMLEALE	SNRPG	P62308	MAD	0	0.1	FALSE
HTP0392A	Plasma	SciLifeLab peptide array	SOX10_HPRR3830104	YSAAGYGLGSALAVASGHSAWISKPPGVALPTVSPPGVDAKAQVKTETA	SOX10	P56693	MAD	-1	13	FALSE
HTP0392A	Plasma	SciLifeLab peptide array	SOX13_HPRR3410162	QDARQLLHSHSGALDGSPNTPFRKDLISLDSSPAKERLEDGCVHPLEEAMLSCDMDGSRHFPESRNSSHI	SOX13	Q9UN79	MAD	0	3	FALSE
HTP0392A	Plasma	SciLifeLab peptide array	SOX13_HPRR3410163	DVLYPRAAGMPLAQPLVEHYVPRSLDPNMPVIVNTCSLREEGEGTDDRHSVADGEMYRYSEDEDSEGEEKSDGELVVLT	SOX13	Q9UN79	MAD	-1	3	FALSE
HTP0392A	Plasma	SciLifeLab peptide array	SOX9_HPRR360171	SQRTHIKTEQLSPSHYSEQQQHSPQQIAYSPFNLPHYSPSYPPITRSQYDYTDHQNSSSYYSHAAGQGTGLYSTFTYMNPAQRPMYTPIADTSGVPSIPQTHSPQHWEQPVYTQLTR	SOX9	P48436	MAD	0	1.1	FALSE
HTP0392A	Plasma	SciLifeLab peptide array	SOX9_HPRR4180522	PFMKMTDEQEKGLSGAPSPTMSEDSAGSPCPSGSGSDTENTRPQENTFPKGEPDLKKESEEDKF	SOX9	P48436	MAD	-1	8.2	FALSE
HTP0392A	Plasma	SciLifeLab peptide array	SP100_HPRR2240001	YKGFENVIHDKLPLQESEEEEREERSGLQLSLEQGTGENSFRSLTWPPSGSPSHAGTTPPENGLSEHPCETEQINAKRKDTTSDKDDSLGSQQTNEQCAQKAEPTESCEQIAVQVNNGDAGREMPCPL	SP100	P23497	MAD	-1	2.5	FALSE
HTP0392A	Plasma	SciLifeLab peptide array	SP100_HPRR2240002	QARTHHNQASDIIVISSEDSEGSTDVDEPLEVFISAPRSEPVINNDNPLESNDEKEGQEATCSRPQIVPEPMDFRKLSTFRESFKKRVIGQDHDFSESSE	SP100	P23497	MAD	-2	1	FALSE
HTP0392A	Plasma	SciLifeLab peptide array	SP140_HPRR1450089	SELEKTFGWSHLEALFSRINLMAYPDLNEIYRSFQNVCYEHSPLQMNNVNDLEDRPRLLPYGKQENSNACHEMDDIAVPQEALSSSPRCEPGFSSESCEQLALPKAGGGDAEDAPSLLPGGGVSCKLAIQIDEGESEEMPKLLP	SP140	Q13342	MAD	32	4.2	TRUE
HTP0392A	Plasma	SciLifeLab peptide array	SP140_HPRR4160718	LSLLPGEGEEGSDDCSEMCDGEERQEASSSLARRGSVSSELENHPMNEEGESEELASSLLYDNVPGAEQSA	SP140	Q13342	MAD	-1	2	FALSE
HTP0392A	Plasma	SciLifeLab peptide array	SRP14_HPRR2870077	GTVEGFEPADNKCLLRATDGKKKISTVVSSKEVNKFQMAYSNLLRANMDGLKKRDKKNKTKKTKAAAAA	SRP14	P37108	MAD	-1	0	FALSE
HTP0392A	Plasma	SciLifeLab peptide array	SRP14_HPRR3930096	MVLLESEQFLTELTRLFQKCRTSGSVYITLKKYDGRTKPIPKK	SRP14	P37108	MAD	1	1	FALSE
HTP0392A	Plasma	SciLifeLab peptide array	SRP19_HPRR2870087	DVQYRGRVRVQLKQEDGSLCLVQFPSRKSVMLYAAEMIPKLKTRTQKTGGADQSLQQGEGSK	SRP19	P09132;Q15695	MAD	3	3	FALSE
HTP0392A	Plasma	SciLifeLab peptide array	SRP19_HPRR2870088	DQDRFICIYPAYLNNKKTIAEGRRIPISKAVENPTATEIQDVCSAVGLNVFLEKNKMYSREWNR	SRP19	P09132;Q15695	MAD	0	2	FALSE
HTP0392A	Plasma	SciLifeLab peptide array	SRP54_HPRR3720460	VIIASEGVEKFKNENFEIIIVDTSGRHKQEDSLFEEMLQVANAIQPDNIVYVMDASIGQACEAQAKAFKDKVDVASVIVT	SRP54	P61011	MAD	2	4.1	FALSE
HTP0392A	Plasma	SciLifeLab peptide array	SRP54_HPRR3720461	SALRSLSNATIINEEVLNAMLKEVCTALLEADVNIKLVKQLRENVKSAIDLEEMASGLNKRKMIQHAVFKELVKLVDPGVKAWTPTKGKQNV	SRP54	P61011	MAD	1	2	FALSE
HTP0392A	Plasma	SciLifeLab peptide array	SRP68_HPRR2500803	AESEETKERLFESMLSECRDAIQVVREELKPDQKQRDYILEGEPGKVSNLQYLHSYLTYIKLSTAIKRNENMAKGLQRALLQQQPEDDSKRSPRPQDLIRLYDIILQNLVELL	SRP68	Q9UHB9	MAD	-2	-2	FALSE
HTP0392A	Plasma	SciLifeLab peptide array	SRP68_HPRR2500805	GEENKENERPSAGSKANKEFGDSLSLEILQIIKESQQQHGLRHGDFQRYRGYCSRRQRRLRKTLNFKMGNRHKFTGKKVTEELLTDNRYLLLVLMDAERAWSYAMQLKQEANTEPRKRFHLLSRLRKAVKHAEELERLCE	SRP68	Q9UHB9	MAD	-1	0	FALSE
HTP0392A	Plasma	SciLifeLab peptide array	SRP68_HPRR2500807	DAKTKLEAQAYTAYLSGMLRFEHQEWKAAIEAFNKCKTIYEKLASAFTEEQAVLYNQRVEEISPNIRYCAYNIGDQSAINELMQMRLRSGGTEGLLAEKLEALITQTRAKQAATMSEVEWRGRTVPVKIDKVRIFLLGLADNEAAIV	SRP68	Q9UHB9	MAD	1	1.1	FALSE
HTP0392A	Plasma	SciLifeLab peptide array	SRP72_HPRR2870116	QHTKAIELLQEFSDQHPENAAEIKLTMAQLKISQGNISKACLILRSIEELKHKPGMVSALVTMYSHEEDIDSAIEVFTQAIQWYQNHQPKSPA	SRP72	O76094	MAD	-1	0	FALSE
HTP0392A	Plasma	SciLifeLab peptide array	SRP72_HPRR2870118	ENALKTIESANQQTDKLKELYGQVLYRLERYDECLAVYRDLVRNSQDDYDEERKTNLSAVVAAQSNWEKVVPENLGLQEGTHELCYNTACA	SRP72	O76094	MAD	-1	2.1	FALSE
HTP0392A	Plasma	SciLifeLab peptide array	SRP72_HPRR2870119	ANFKLKYGRKKEAISDLQQLWKQNPKDIHTLAQLISAYSLVDPEKAKALSKHLPSSDSMSLKVDVEALENSAGATYIRKKGGKVTGDSQPKEQG	SRP72	O76094	MAD	-1	4	FALSE
HTP0392A	Plasma	SciLifeLab peptide array	SSB_HPRR2010045	AKICHQIEYYFGDFNLPRDKFLKEQIKLDEGWVPLEIMIKFNRLNRLTTDFNVIVEALSKSKAELMEISEDKTKIRRSPSKPLPEVTDEYKNDVKNRSVYIKGFPTDATLDD	SSB	P05455	MAD	2	19.5	FALSE
HTP0392A	Plasma	SciLifeLab peptide array	SSB_HPRR2010046	VVFDSIESAKKFVETPGQKYKETDLLILFKDDYFAKKNEERKQNKVEAKLRAKQEQEAKQKL	SSB	P05455	MAD	2	4.1	FALSE
HTP0392A	Plasma	SciLifeLab peptide array	SSSCA1_HPRR3050793	NGAEVDDFSWEPPTEAETKVLQARRERQDRISRLMGDYLLRGYRMLGETCADCGTILLQDKQRKIYCVACQELDSDVDKDNPALNAQAALSQAR	SSSCA1	O60232	MAD	-1	0	FALSE
HTP0392A	Plasma	SciLifeLab peptide array	SUMO1_HPRR2920297	QDSSEIHFKVKMTTHLKKLKESYCQRQGVPMNSLRFLFEGQRIADNHTPKELGMEEEDVIEVYQEQT	SUMO1	P63165	MAD	1	1	FALSE
HTP0392A	Plasma	SciLifeLab peptide array	SUMO1_HPRR3890167	SDQEAKPSTEDLGDKKEGEYIKLKV	SUMO1	P63165	MAD	0	3	FALSE
HTP0392A	Plasma	SciLifeLab peptide array	SUMO4*_HPRR3230036	TDKPAQLEMEDEDTIDVFQQPTGGV	SUMO4*	Q6EEV6;P55854;P61956	MAD	12	2.1	TRUE
HTP0392A	Plasma	SciLifeLab peptide array	SUMO4*_HPRR3230037	HINLKVAGQDGSVVQFKIKRHTPLSKLMKAYC	SUMO4*	Q6EEV6;P55854;P61956	MAD	-2	0	FALSE
HTP0392A	Plasma	SciLifeLab peptide array	TALDO1_HPRR3050870	FVGRILDWHVANTDKKSYEPLEDPGVKSVTKIYNYYKKFSYKTIVMGASFRNTGEIKALAGCDFLTISPKLLGEL	TALDO1	P37837	MAD	0	1	FALSE
HTP0392A	Plasma	SciLifeLab peptide array	TALDO1_HPRR3050873	MSSSPVKRQRMESALDQLKQFTTVVADTGDFHAIDEYKPQDATTNPSLILAAAQMPAYQELVEEAIAYGRKLGGS	TALDO1	P37837	MAD	6	8.2	FALSE
HTP0392A	Plasma	SciLifeLab peptide array	TARS_HPRR3010092	MFEEKASSPSGKMGGEEKPIGAGEEKQKEGGKKKNKEGSGDGGRAELNPWPEYIYTRLEMYNIL	TARS	P26639	MAD	0	0	FALSE
HTP0392A	Plasma	SciLifeLab peptide array	TARS_HPRR3890005	RDNKVHGERTISETIERLQQLKEFRSKQAEEEF	TARS	P26639	MAD	-1	3.2	FALSE
HTP0392A	Plasma	SciLifeLab peptide array	TDRD6_HPRR2630195	VLHVDYGRKELVSCSSLRYLLPEYFRMPVVTYPCALYGLWDGGRGWSRSQVGDLKALILGKAVNAKIEFYCSFEHVYYVSLYGEDGINLNRVFGVQSC	TDRD6	O60522	MAD	2	2	FALSE
HTP0392A	Plasma	SciLifeLab peptide array	TDRD6_HPRR4290688	INSSYKELKLLQSLTKTNLVTQYQDSVGNKNSQVFPLTTEKKEEISAETPLKTARVEATLSERKIGDSCDKDLPLKFCEFPQKTI	TDRD6	O60522	MAD	3	25.1	FALSE
HTP0392A	Plasma	SciLifeLab peptide array	TG_HPRR350042	KMCSADYADLLQTFQVFILDELTARGFCQIQVKTFGTLVSIPVCNNSSVQVGCLTRERLGVNVTWKSRLEDIPVASLPDLHDIERALVGKDLLGRFTDLIQSGSFQLHLDSKTFPAETIRFLQGDHFGTSPRTWFGCSEGFYQVLTSEASQDGLGCVKCPEGS	TG	P01266	MAD	-2	-1	FALSE
HTP0392A	Plasma	SciLifeLab peptide array	TGM2_HPRR2430028	MAEELVLERCDLELETNGRDHHTADLCREKLVVRRGQPFWLTLHFEGRNYEASVDSLTFSVVTGPAPSQEAGTK	TGM2	P21980	MAD	2	2	FALSE
HTP0392A	Plasma	SciLifeLab peptide array	TGM2_HPRR2430030	VEPVINSYLLAERDLYLENPEIKIRILGEPKQKRKLVAEVSLQNPLPVALEGCTFTVEGAGLTEEQKTVEIPDPVEAGEEVKVRMDLLP	TGM2	P21980	MAD	0	0	FALSE
HTP0392A	Plasma	SciLifeLab peptide array	TH_HPRR2010098	EFGLCKQNGEVKAYGAGLLSSYGELLHCLSEEPEIRAFDPEAAAVQPYQDQTYQSVYFVSESFSDAKDKLRSYASRIQRPFSVKFDPYTLAIDVLDSPQAVRRSLEGVQDEL	TH	P07101	MAD	-1	0	FALSE
HTP0392A	Plasma	SciLifeLab peptide array	TH_HPRR3790012	SESFSDAKDKLRSYASRIQRPFSVKFDPYTLAIDVLDSPQAVRRSLEGVQDELDTLAHALSAIG	TH	P07101	MAD	17	2	TRUE
HTP0392A	Plasma	SciLifeLab peptide array	TKT_HPRR2460038	HYYEGGIGEAVSSAVVGEPGITVTHLAVNRVPRSGKPAELLKMFGIDRDAIAQAVRGLITKA	TKT	P29401	MAD	2	2.1	FALSE
HTP0392A	Plasma	SciLifeLab peptide array	TKT_HPRR2460039	IAKTFKGRGITGVEDKESWHGKPLPKNMAEQIIQEIYSQIQSKKKILATPPQEDAPSVDIANIRMPSLPSYKVGDKIATRKAYGQ	TKT	P29401	MAD	-1	2	FALSE
HTP0392A	Plasma	SciLifeLab peptide array	TMEM59_HPRR1950574	HLLFPLTLVRSFWSDMMDSAQSFITSSWTFYLQADDGKIVIFQSKPEIQYAPHLEQEPTNLRESSLSKMSSDLQMRNSQAHRNFLEDGESDGFLRCLSLNSGW	TMEM59	Q9BXS4	MAD	1	1	FALSE
HTP0392A	Plasma	SciLifeLab peptide array	TNFRSF13C_HPRR221279	SWRRRQRRLRGASSAEAPDGDKDAPEPLDKVIILSPGISDATAPAWPPPGEDPGTTPPGHSVPVPATELGSTELVTTKTAGPEQQ	TNFRSF13C	Q96RJ3	MAD	-1	2	FALSE
HTP0392A	Plasma	SciLifeLab peptide array	TNNC1_HPRR3460135	NADGYIDLDELKIMLQATGETITEDDIEELM	TNNC1	P63316	MAD	-1	1	FALSE
HTP0392A	Plasma	SciLifeLab peptide array	TNNC1_HPRR3460136	MDDIYKAAVEQLTEEQKNEFKAAFDIFVLGAEDGCISTKELGKVM	TNNC1	P63316	MAD	1	2.1	FALSE
HTP0392A	Plasma	SciLifeLab peptide array	TNNC2_HPRR3300245	NADGYIDPEELAEIFRASGEHVTDEEIESLM	TNNC2	P02585	MAD	-2	51.1	FALSE
HTP0392A	Plasma	SciLifeLab peptide array	TNNC2_HPRR3870324	ARSYLSEEMIAEFKAAFDMFDADGGGDISVKE	TNNC2	P02585	MAD	-1	2	FALSE
HTP0392A	Plasma	SciLifeLab peptide array	TNNI2_HPRR3960019	ELEKEESRREAEKQNYLAEHCPPLHIPGSMSEVQELCKQLHAKIDAAEEEKYDMEVRVQKTSK	TNNI2	P48788	MAD	15	6.6	TRUE
HTP0392A	Plasma	SciLifeLab peptide array	TNNI3_HPRR3140624	PIRRRSSNYRAYATEPHAKKKSKISASRKLQLKTLLLQIAKQELEREAEERRGEKGRALSTRCQPLELAGLGFAELQ	TNNI3	P19429	MAD	-1	0	FALSE
HTP0392A	Plasma	SciLifeLab peptide array	TNNT1_HPRR3920058	EEEEAPEEPEPVAEPEEERPKPSRPVVPPLIPPKIPEGE	TNNT1	P13805	MAD	-1	25.7	FALSE
HTP0392A	Plasma	SciLifeLab peptide array	TNNT2_HPRR2190018	IEEVVEEYEEEEQEEAAVEEEDWREDEDEQEEAAEEDAEAEAETEETRAEEDEEEEEAKEAEDGPMEESKPKPRSFMPNLV	TNNT2	P45379	MAD	86	98.7	FALSE
HTP0392A	Plasma	SciLifeLab peptide array	TNNT2_HPRR2190019	EEEENRRKAEDEARKKKALSNMMHFGGYIQKQAQTERKSGKRQTEREKKKKILAERRKVLAIDHLNEDQLREKAKELWQSIYNLEAEKFDLQEKFKQQKYEINVLRNRINDNQKVSK	TNNT2	P45379	MAD	0	2.1	FALSE
HTP0392A	Plasma	SciLifeLab peptide array	TNNT3_HPRR3050240	RKPLNIDHLGEDKLRDKAKELWETLHQLEIDKFEFGEKLKRQKYDITTLRSRIDQAQKHSKKAGTPAKGKVG	TNNT3	P45378	MAD	-1	0.2	FALSE
HTP0392A	Plasma	SciLifeLab peptide array	TNNT3_HPRR3890527	EEEAQEEAAEVHEEVHEPEEVQEDTAEEDAEEEKPRPKLTAPK	TNNT3	P45378	MAD	3	5	FALSE
HTP0392A	Plasma	SciLifeLab peptide array	TOP1_HPRR2420091	GDHLHNDSQIEADFRLNDSHKHKDKHKDREHRHKEHKKEKDREKSKHSNSEHKDSEKKHKEKEKTKHKDGSSEKH	TOP1	P11387	MAD	-1	0	FALSE
HTP0392A	Plasma	SciLifeLab peptide array	TOP1_HPRR2420092	KVRASGDAKIKKEKENGFSSPPQIKDEPEDDGYFVPPKEDIKPLKRPRDEDDADYKPKK	TOP1	P11387	MAD	-2	23.1	FALSE
HTP0392A	Plasma	SciLifeLab peptide array	TOP1_HPRR2420093	KKEKKRKLEEEEDGKLKKPKNKDKDKKVPEPDNKKKKPKKEEEQKWKWWEEERYPEGIKWKFLEHKGPVFAPPYEPLPENVKFYYD	TOP1	P11387	MAD	-1	2	FALSE
HTP0392A	Plasma	SciLifeLab peptide array	TOP2A_HPRR1370117	RGQRVIPRITIEMKAEAEKKNKKKIKNENTEGSPQEDGVELEGLKQRLEKKQKREPGTKTKKQTTLAFKPIKKGKKRNPWSDSESDRSSDESNFDVP	TOP2A	P11388	MAD	1	3.1	FALSE
HTP0392A	Plasma	SciLifeLab peptide array	TOP2A_HPRR1370118	DASPPKTKTSPKLSNKELKPQKSVVSDLEADDVKGSVPLSSSPPATHFPDETEITNPVPKKNVTVKKTAAKSQSSTSTTGAKKRAAPKGTKRDPALNSGVSQKPDPAKTKNRRKRKPSTSDDSDSNFEKIVSKAVTSKKSKG	TOP2A	P11388	MAD	38	22.2	TRUE
HTP0392A	Plasma	SciLifeLab peptide array	TPH1_HPRR1220002	ISELKHALSGHAKVKPFDPKITCKQECLITTFQDVYFVSESFEDAKEKMREFTKTIKRPFGVKYNPYTRSIQILKDTKSITSAMNELQHDLDVVSDALAKVSRKPSI	TPH1	P17752	MAD	1	1	FALSE
HTP0392A	Plasma	SciLifeLab peptide array	TPM4*_HPRR3340170	EMQLKEAKHIAEEADRKYEEVARKLVILE	TPM4*	P67936;P07951;P09493;P06753	MAD	-1	16	FALSE
HTP0392A	Plasma	SciLifeLab peptide array	TPM4*_HPRR3340171	KAADESERGMKVIENRAMKDEEKMEIQE	TPM4*	P67936;P07951;P09493;P06753	MAD	0	0	FALSE
HTP0392A	Plasma	SciLifeLab peptide array	TPM4*_HPRR3340172	LNRRIQLVEEELDRAQERLATALQKLEE	TPM4*	P67936;P07951;P09493;P06753	MAD	2	11.1	FALSE
HTP0392A	Plasma	SciLifeLab peptide array	TPO_HPRR1950563	RELEKHSLSRVICDNTGLTRVPMDAFQVGKFPEDFESCDSITGMNLEAWRETFPQDDKCGFPESVENGDFVHCEESGRRVLVYSCRHGYELQGREQLTCTQEGWDFQPPLCKDVNECADGA	TPO	P07202	MAD	0	22.9	FALSE
HTP0392A	Plasma	SciLifeLab peptide array	TPO_HPRR4180385	STVICRWTRTGTKSTLPISETGGGTPELRCGKHQAVGTSPQRAAAQDSEQESAGMEGRDTHRLPRA	TPO	P07202	MAD	47	59.6	FALSE
HTP0392A	Plasma	SciLifeLab peptide array	TRIM21_HPRR1060031	LEKDEREQLRILGEKEAKLAQQSQALQELISELDRRCHSS	TRIM21	P19474	MAD	1	15.4	FALSE
HTP0392A	Plasma	SciLifeLab peptide array	TRIM24_HPRR3500066	NCAEFNEPDSEVANAGIKLENYFEELLKNLYPEKRFPKPEFRNESEDNKFSDDSDDDFVQPRKKRLKSIEERQLLK	TRIM24	O15164	MAD	0	21.2	FALSE
HTP0392A	Plasma	SciLifeLab peptide array	TRIM24_HPRR3500067	SSPVGGSYNLPSLPDIDCSSTIMLDNIVRKDTNIDHGQPRPPSNRTVQSPNSSVPSPGLAGPVTMTSVHPPIRSPSA	TRIM24	O15164	MAD	-1	0	FALSE
HTP0392A	Plasma	SciLifeLab peptide array	TRIM28_HPRR4180661	TDSTFSLDQPGGTLDLTLIRARLQEKLSPPYSSPQEFAQDVGRMFKQFNKLTEDKADVQSIIGLQRFFETRMNEAFGDTKFSAVLV	TRIM28	Q13263	MAD	0	1	FALSE
HTP0392A	Plasma	SciLifeLab peptide array	TRIM33_HPRR640002	MQPHLQRQHSNPGHAGPFPVVSVHNTTINPTSPTTATMANANRGPTSPSVTAIELIPSVTNPENLPSLPDIPPIQLEDAGSSSLDNLLSRYISGSHLPPQPTSTMNPSPGPSALSPGSSGLSNSHTPVRPPSTSSTGSR	TRIM33	Q9UPN9	MAD	0	7	FALSE
HTP0392A	Plasma	SciLifeLab peptide array	TROVE2_HPRR400060	ESVNQMQPLNEKQIANSQDGYVWQVTDMNRLHRFLCFGSEGGTYYIKEQKLGLENAEALIRLIEDGRGCEVIQEIKSFSQEGRTTKQEPMLFALAICSQCSDISTKQAAFKAVSEVCRIPTHLFTFIQFKKDLKESMKCGMWG	TROVE2	P10155	MAD	4	4	FALSE
HTP0392A	Plasma	SciLifeLab peptide array	TROVE2_HPRR400061	FLLAVDVSASMNQRVLGSILNASTVAAAMCMVVTRTEKDSYVVAFSDEMVPCPVTTDMTLQQVLMAMSQIPAGGTDCSLPMIWAQKTNTPADVFIVFTDNETFAGGVHPAIALREYRKKMDIPAKLIVCGMTSNGF	TROVE2	P10155	MAD	-2	-2	FALSE
HTP0392A	Plasma	SciLifeLab peptide array	TRPC3_HPRR2870071	NFPKCRRRRLQKDIEMGMGNSKSRLNLFTQSNSRVFESHSFNSILNQPTRYQQI	TRPC3	Q13507	MAD	0	2.1	FALSE
HTP0392A	Plasma	SciLifeLab peptide array	TSGA10_HPRR2920463	IASLGESLAMKEKTISGMKNIIAEMEQASRQCTEALIVCEQDVSRMRRQLDETNDELAQIARERDILAHDNDNLQEQFAKAKQENQ	TSGA10	Q9BZW7	MAD	2	19.9	FALSE
HTP0392A	Plasma	SciLifeLab peptide array	TSGA10_HPRR2920464	RREMMKSCKSPKSTTAHAILRRVETERDVAFTDLRRMTTERDSLRERLKIAQETAFNEKAHLEQRIEELECTVHNLDDERMEQMSNM	TSGA10	Q9BZW7	MAD	0	19.3	FALSE
HTP0392A	Plasma	SciLifeLab peptide array	TSHR_HPRR141622	RADLSYPSHCCAFKNQKKIRGILESLMCNESSMQSLRQRKSVNALNSPLHQEYEENLGDSIVGYKEKSKFQDTHNNAHYYVFFEEQEDEIIGFGQELKNPQEETLQAFDSHYDYTICGDSEDMVCTPKSDEFNPC	TSHR	P16473	MAD	-1	-1	FALSE
HTP0392A	Plasma	SciLifeLab peptide array	TSHR_HPRR4220232	MGCSSPPCECHQEEDFRVTCKDIQRIPSLPPSTQTLKLIETHLRTIPSHAFSNLPNISRIYVSIDVTLQQLESHSF	TSHR	P16473	MAD	-1	-1	FALSE
HTP0392A	Plasma	SciLifeLab peptide array	TTN_HPRR1830052	GTVSTSCYLAVQVSEEFEKETTAVTEKFTTEEKRFVESRDVVMTDTSLTEEQAGPGEPAAPYFITKPVVQKLVEGGSVVFGCQVGGNPKPHVYWKKSGVPLTTGYRYKVSYNKQTGECKLVISMTFADDAGEYT	TTN	Q8WZ42	MAD	-1	7	FALSE
HTP0392A	Plasma	SciLifeLab peptide array	TTN_HPRR1830053	HFLSILTIDTSDAEDYSCVLVEDENVKTTAKLIVEGAVVEFVKELQDIEVPESYSGELECIVSPENIEGKWYHNDVELKSNGKYTITSRRGRQNLTVKDVTKEDQGEYSFVIDGKKTTCKLKMK	TTN	Q8WZ42	MAD	1	4.1	FALSE
HTP0392A	Plasma	SciLifeLab peptide array	UBA1_HPRR232462	KISFKSLVASLAEPDFVVTDFAKFSRPAQLHIGFQALHQFCAQHGRPPRPRNEEDAAELVALAQAVNARALPAVQQNNLDEDLIRKLAYVAAGDLAPINAFIGGLAAQEVMKACSGKFMPIMQWLYFDALECLPEDKEVLTEDKCLQR	UBA1	P22314	MAD	6	3	TRUE
HTP0392A	Plasma	SciLifeLab peptide array	UBA1_HPRR232463	LYKVVQGHRQLDSYKNGFLNLALPFFGFSEPLAAPRHQYYNQEWTLWDRFEVQGLQPNGEEMTLKQFLDYFKTEHKLEITMLSQGVSMLYSFFMPAAKLKERLDQPMTEIVSRVSKRKLGRHVRALVLELCCNDESGEDVEVPYVRYTIR	UBA1	P22314	MAD	7	5	TRUE
HTP0392A	Plasma	SciLifeLab peptide array	UGT1A1_HPRR3790923	SHWLSMLGAIQQLQQRGHEIVVLAPDASLYIRDGAFYTLKTYPVPFQREDVKES	UGT1A1	P22309	MAD	-1	0	FALSE
HTP0392A	Plasma	SciLifeLab peptide array	UGT1A5*_HPRR4420458	HRSCVELLHNEALIRHLHATSFDVVLTDP	UGT1A5*	P35504;P22310;P35503	MAD	75	7.1	TRUE
HTP0392A	Plasma	SciLifeLab peptide array	UGT1A6_HPRR3761044	WLSMKDIVEVLSDRGHEIVVVVPEVNLLLKESKYYTRKIYPVPYDQEELKNRYQSFGNNHFAERSFLTAPQTEYRNNMIVIGLY	UGT1A6	P19224	MAD	0	0	FALSE
HTP0392A	Plasma	SciLifeLab peptide array	UGT1A8*_HPRR3340348	QPVKPLDRAVFWIEFVMRHKGAKHLRVAAHDLTWFQYHSL	UGT1A8*	Q9HAW9;Q9HAW8;O60656;Q9HAW7;P19224;P35504;P22310;P35503;P22309;O75795;P54855;P36537;Q6UWM9;P16662;O75310;Q9BY64;P06133;Q9Y4X1	MAD	0	1	FALSE
HTP0392A	Plasma	SciLifeLab peptide array	UGT2A1_HPRR1951665	KEHNVTVLVASGALFITPTSNPSLTFEIYKVPFGKERIEGVIKDFVLTWLENRPSPSTIWRFYQEMAKVIKDFHMVSQEICDGVLKNQQLMAKLKKSKFEVLVSDPVFPCGDIVALKLGIPFMYS	UGT2A1	Q9Y4X1	MAD	4	6	FALSE
HTP0392A	Plasma	SciLifeLab peptide array	VCL_HPRR350132	KMIDERQQELTHQEHRVMLVNSMNTVKELLPVLISAMKIFVTTKNSKNQGIEEALKNRNFTVEKMSAEINEIIRVLQLTSWDEDAWASKDTEAMKRALASIDSKLNQAKGWLRDPSASPGDAGEQAIRQILDEAGKVGELCAGKERREI	VCL	P18206	MAD	0	6.1	FALSE
HTP0392A	Plasma	SciLifeLab peptide array	VCL_HPRR4160211	SALTSKLADLRRQGKGDSPEARALAKQVATALQNLQTKTNRAVANSRPAKAAVHLEGKIEQAQRWIDNPTVDDRGVGQAAIRGLVAEGHRLANVMMGP	VCL	P18206	MAD	6	4	TRUE
HTP0392A	Plasma	SciLifeLab peptide array	VIM_HPRR370004	FANYIDKVRFLEQQNKILLAELEQLKGQGKSRLGDLYEEEMRELRRQVDQLTNDKARVEVERDNLAEDIMRLREKLQEEMLQREEAENTLQSFRQDVDNASLARLDLERKVES	VIM	P08670	MAD	1	2	FALSE
HTP0392A	Plasma	SciLifeLab peptide array	WARS_HPRR141609	TDSDCIGKISFPAIQAAPSFSNSFPQIFRDRTDIQCLIPCAIDQDPYFRMTRDVAPRIGYPKPALLHSTFFPALQGAQTKMSASDPNSSIFLTDTAKQIKTKVNKHAFSGGRDTIEEHRQFGGNCDVDVSFMYLTF	WARS	P23381	MAD	0	0	FALSE
HTP0392A	Plasma	SciLifeLab peptide array	WARS_HPRR141610	DATEAEEDFVDPWTVQTSSAKGIDYDKLIVRFGSSKIDKELINRIERATGQRPHHFLRRGIFFSHRDMNQVLDAYENKKPFYLYTGRGPSSEAMHVGHLIPFIFTKWLQDVFNVPLVIQMTDDEKYLWKDLTLDQAYSYAVENA	WARS	P23381	MAD	7	6	TRUE
HTP0392A	Plasma	SciLifeLab peptide array	XKR6_HPRR2540593	YGVLHPTGPRAKILASSCCAELLWGIPLPPDVEPMAPEIPGYRGTQVTPTRAVTEQQEDLTADTCLPVFQVRPMGPPTPLGRPYLPEGPLIKIDMPR	XKR6	Q5GH73	MAD	-2	0.1	FALSE
HTP0392A	Plasma	SciLifeLab peptide array	XKR6_HPRR4040109	FVDRRLRRTINILQYVTPTAVGIRYRDGPLLYELLQYESSL	XKR6	Q5GH73	MAD	2	1	TRUE
HTP0392A	Plasma	SciLifeLab peptide array	XKR8_HPRR3410225	GLLVWQQEEPSEFDLAYADFLALDISM	XKR8	Q9H6D3	MAD	-1	2.1	FALSE
HTP0392A	Plasma	SciLifeLab peptide array	XKR8_HPRR3410226	HPSCCWKPDPDQVDGARSLLSPEGYQLPQNRRMTHLAQKFFPKAKDEAASPVKG	XKR8	Q9H6D3	MAD	-1	2	FALSE
HTP0392A	Plasma	SciLifeLab peptide array	XKR9_HPRR2180234	FHPNRSAETKCDEIDGKPVLRECRMRYFLME	XKR9	Q5GH70	MAD	1	5.1	FALSE
HTP0392A	Plasma	SciLifeLab peptide array	YARS_HPRR2320095	GNVENNGVLSFIKHVLFPLKSEFVILRDEKWGGNKTYTAYVDLEKDFAAEVVHPGDLKNSVEVALNKLLDPIREKFNTPALKKLASAAYPDPSKQKPMAKGPAKNSEPEEVIPSRLDIRVGKIITVEKHPDAD	YARS	P54577	MAD	15	15.7	FALSE
HTP0392A	Plasma	SciLifeLab peptide array	YARS_HPRR2320096	VLCNLKPQKMRGVESQGMLLCASIEGINRQVEPLDPPAGSAPGEHVFVKGYEKGQPDEELKPKKKVFEKLQADFKISEECIAQWKQTNFMTKLGSIS	YARS	P54577	MAD	-1	1	FALSE
HTP0392A	Plasma	SciLifeLab peptide array	ZNF688_HPRR3610291	QWIHRSCSGGRRGRRPGIRAVPRAPVRGDRDPPVLFRHYPDIFEECG	ZNF688	P0C7X2	MAD	-1	1	FALSE
HTP0392A	Plasma	SciLifeLab peptide array	ZNF688_HPRR3610292	GERLGGARRGDVPNRKEEEPEEVPRAKGPRKAPVKESPEVLVERNPDPAISVAPARAQPPKNAAWDPTTGAQ	ZNF688	P0C7X2	MAD	0	316.9	FALSE
HTP0087B	Plasma	SciLifeLab peptide array	A2M_HPRR350039	SVLLMKPDAELSASSVYNLLPEKDLTGFPGPLNDQDDEDCINRHNVYINGITYTPVSSTNEKDMYSFLEDMGLKAFTNSKIRKPKMCPQLQQYEMHGPEGLRVGFYESDVMGRGHARLVHVEEPHTETVRKYFPETWIWDLVVVNS	A2M	P01023	MAD	4	3	TRUE
HTP0087B	Plasma	SciLifeLab peptide array	AARS_HPRR3160056	DRASKADVQKRVLEKTKQFIDSNPNQPLVILEMESGASAKALNEALKLFKMHSPQTSAMLFTVDNEAGKITCLCQVPQNAANRGLKASEWVQQVSGLMDGKGGGKD	AARS	P49588	MAD	-1	7.1	FALSE
HTP0087B	Plasma	SciLifeLab peptide array	AARS_HPRR3160058	EFTVKNAQVRGGYVLHIGTIYGDLKVGDQVWLFIDEPRRRPIMSNHTATHILNFALRSVLGEADQKGSLVAPDRLRFDFTAKGAMSTQQIKKAEEIANEMIEAAKAVYTQDCP	AARS	P49588	MAD	0	1	FALSE
HTP0087B	Plasma	SciLifeLab peptide array	ABCC8_HPRR2060003	DHLGKENDVFQPKTQFLGVYFVSSQ	ABCC8	Q09428	MAD	1	2	FALSE
HTP0087B	Plasma	SciLifeLab peptide array	ABCC8_HPRR4160072	VSVQKLSEFLSSAEIREEQCAPHEPTPQGPASKYQAVPLRVVNRKRPAREDCRGLTGPLQSLVPSADGDADNCCVQIMGGYFTWTPD	ABCC8	Q09428	MAD	0	1.1	FALSE
HTP0087B	Plasma	SciLifeLab peptide array	ACHE_HPRR2440120	RGIRLKTPGGPVSAFLGIPFAEPPMGPRRFLPPEPKQPWSGVVDATTFQSVCYQYVDTLYPGFEGTEMWNPNRE	ACHE	P22303	MAD	0	1.1	FALSE
HTP0087B	Plasma	SciLifeLab peptide array	ACHE_HPRR3870163	TVGMGEARRRATQLAHLVGCPPGGTGGNDTELVACLRTRPAQVLVNHEWHVLPQESVFRFSFVPVVDGDFLSDTPEALINAGDFHG	ACHE	P22303	MAD	0	1	FALSE
HTP0087B	Plasma	SciLifeLab peptide array	ACTA2*_HPRR3230094	PKANREKMTQIMFETFNTPAMYVAIQ	ACTA2*	P62736;P63267;A5A3E0;P0CG38;P0CG39;Q6S8J3;P63261;P60709;P68032;P68133;Q562R1	MAD	1	8	FALSE
HTP0087B	Plasma	SciLifeLab peptide array	ACTA2*_HPRR3230096	MVGMGQKDSYVGDEAQSKRGILTLKYPIEHGIVTNWD	ACTA2*	P62736;P63267;A5A3E0;P0CG38;P0CG39;Q6S8J3;P63261;P60709;P68032;P68133;Q562R1	MAD	-1	0	FALSE
HTP0087B	Plasma	SciLifeLab peptide array	AIMP1_HPRR2310067	CNLKPAKMRGVLSQAMVMCASSPEKIEILAPPNGSVPGDRITFDAFPGEPDKELNPKKKIWEQIQPDLHTNDECVATYKGVPFEVKGKGVCRAQTMSNSGI	AIMP1	Q12904	MAD	-1	1	FALSE
HTP0087B	Plasma	SciLifeLab peptide array	AIMP1_HPRR2310068	MANNDAVLKRLEQKGAEADQIIEYLKQQVSLLKEKAILQATLREEKKLRVENAKLKKEIEELKQELIQAEIQNGV	AIMP1	Q12904	MAD	5	67.3	FALSE
HTP0087B	Plasma	SciLifeLab peptide array	AIMP1_HPRR2310069	TPLHANSMVSENVIQSTAVTTVSSGTKEQIKGGTGDEKKAKEKIEKKGEKKEKKQQSIAGSADSKPIDVSRLDLRIGCIITARKHPDADSLY	AIMP1	Q12904	MAD	0	38	FALSE
HTP0087B	Plasma	SciLifeLab peptide array	AIMP2_HPRR2440262	APLRVELPTCMYRLPNVHGRSYGPAPGAGHVQEESNLSLQALESRQDDILKRLYELKAAVDGLSKMIQTPDADLDVTNIIQADEPTTLTTNAL	AIMP2	Q13155	MAD	-1	2.2	FALSE
HTP0087B	Plasma	SciLifeLab peptide array	AIMP2_HPRR2440263	SVLGKDYGALKDIVINANPASPPLSLLVLHRLLCEHFRVLSTVHTHSSVKSVPENLLKCFGEQNKKQPRQDYQLGFTLIWKNVPKTQ	AIMP2	Q13155	MAD	-1	-0.9	FALSE
HTP0087B	Plasma	SciLifeLab peptide array	AIMP2_HPRR2440264	IARFLFSLFGQKHNAVNATLIDSWVDIAIFQLKEGSSKEKAAVFRSMNSALGKSPWLAGNELTVADVVLWSVLQQIGGCSVTVPANVQRWMRSCENLAPFNTALKLLK	AIMP2	Q13155	MAD	1	2	FALSE
HTP0087B	Plasma	SciLifeLab peptide array	ALOX12_HPRR1960006	YAWVPNAPCTMRMPPPTTKEDVTMATVMGSLPDVRQACLQMAISWHLSRRQPDMVPLGHHKEKYFSGPKPKAVLNQFRTDLEKLEKEITARNEQLDWPYEY	ALOX12	P18054	MAD	0	1	FALSE
HTP0087B	Plasma	SciLifeLab peptide array	ALOX12_HPRR1960007	PGDNALDMFQKHREKELKDRQQIYCWATWKEGLPLTIAADRKDDLPPNMRFHEEKRLDFEWTLKAGALEMALKRVYTLLSSWNCLEDFDQIFWGQKSALAEKVRQCWQDDELFSYQFLNGANP	ALOX12	P18054	MAD	-2	0	FALSE
HTP0087B	Plasma	SciLifeLab peptide array	ANO2_HPRR3070034	PTDISDQIKKEKSLLVDFFLKEEHEKLKLMDEPALRSPGGGDRSRSRAASSAPSGQSQLGSMMSSGSQHTNV	ANO2	Q9NQ90	MAD	3	8.2	FALSE
HTP0087B	Plasma	SciLifeLab peptide array	ANO2_HPRR3070036	EPVSLEARLSRMHFHDSQRKVDYVLAYHYRKRGVHLAQGFPGHSLAIVSNGETGKEPHAGGPGDIELGPLDALEEERKEQREEFEHNLM	ANO2	Q9NQ90	MAD	17	17.4	FALSE
HTP0087B	Plasma	SciLifeLab peptide array	ANO2_HPRR3070037	IPLLPGSPRRLSPQAGSRGGQGPKHGQQCLKMPGPRAPGLQGGSNRDPGQPCGGESTRSSSVINNYLDAN	ANO2	Q9NQ90	MAD	1	1	FALSE
HTP0087B	Plasma	SciLifeLab peptide array	ANXA2_HPRR3460748	YDAGVKRKGTDVPKWISIMTERSVPHLQKVFDRYKSYSPYDMLESIRKEVKGDLENAFLNLVQCIQNKPLYFADRLYDSMKGKG	ANXA2	P07355	MAD	-1	0	FALSE
HTP0087B	Plasma	SciLifeLab peptide array	ANXA2_HPRR3460749	MGRQLAGCGDAGKKASFKMSTVHEILCKLSLEGDHSTPPSAYGSVKAYTNFDAERDALNIETAIKTKGVDEVTIVNI	ANXA2	P07355	MAD	1	48.1	FALSE
HTP0087B	Plasma	SciLifeLab peptide array	ANXA5_HPRR1350096	GTVTDFPGFDERADAETLRKAMKGLGTDEESILTLLTSRSNAQRQEISAAFKTLFGRDLLDDLKSELTGKFEKLIVALMKPSRLYDAYELKHALKGAGTNEKVLTEIIASRTPEELRAIKQVYEEEYGSSLEDDVVG	ANXA5	P08758	MAD	1	8.1	FALSE
HTP0087B	Plasma	SciLifeLab peptide array	ANXA5_HPRR1350097	LVVLLQANRDPDAGIDEAQVEQDAQALFQAGELKWGTDEEKFITIFGTRSVSHLRKVFDKYMTISGFQIEETIDRETSGNLEQLLLAVVKSIRSIPAYLAETLYYAMKGAG	ANXA5	P08758	MAD	11	11	FALSE
HTP0087B	Plasma	SciLifeLab peptide array	APOH_HPRR350085	EPGEEITYSCKPGYVSRGGMRKFICPLTGLWPINTLKCTPRVCPFAGILENGAVRYTTFEYPNTISFSCNTGFYLNGADSAKCTEEGKWSPELPVCAPIICPPPSIPTFATLRVYKPSAGNNSLYRDTAVFECLPQHAMFGNDTITC	APOH	P02749	MAD	1	4	FALSE
HTP0087B	Plasma	SciLifeLab peptide array	AQP4_HPRR4040261	MSDRPTARRWGKCGPLCTRENIMVAFKGVWTQAFWKA	AQP4	P55087	MAD	1	1	FALSE
HTP0087B	Plasma	SciLifeLab peptide array	ARFGAP1_HPRR3300073	TLPSMVHRVSGQPQSVTASSDKAFEDWLNDDLGSYQGAQGNRYVGFGNTPPPQKKEDDFLNNAMSSLYSGWSSFTTGASRFASAAKEGATKFGSQASQKASEL	ARFGAP1	Q8N6T3	MAD	7	324.3	FALSE
HTP0087B	Plasma	SciLifeLab peptide array	ARFGAP1_HPRR3300076	DHFQNSNIDQSFWETFGSAEPTKTRKSPSSDSWTCADTSTERRSSDSWEVWGSASTNRNSNSDGGEGGEGTKKAVPPAVPTDDGWD	ARFGAP1	Q8N6T3	MAD	1	9.1	FALSE
HTP0087B	Plasma	SciLifeLab peptide array	CACNA1S_HPRR3410011	EEEKSTMAKKLEQKPKGEGIPTTAKLKIDEFESNVNEVKDPYPSADFPGDDEEDEPEIPLSPRPRPLAEL	CACNA1S	Q13698	MAD	0	16.6	FALSE
HTP0087B	Plasma	SciLifeLab peptide array	CACNA1S_HPRR3410014	ESPVFLEDFPQDPRTNPLARANTNNANANVAYGNSNHSNSHVFSSVHYEREFPEETETPATRGRALGQPCRVLGPHSKPCVE	CACNA1S	Q13698	MAD	3	16	FALSE
HTP0087B	Plasma	SciLifeLab peptide array	CARS_HPRR400045	SQCNLYMAARKAVRKRPNQALLENIALYLTHMLKIFGAVEEDSSLGFPVGGPGTSLSLEATVMPYLQVLSEFREGVRKIAREQKVPEILQLSDALRDNILPELGVRFEDHEGLPTVVKLVDRNTLLKEREEKRRVE	CARS	P49589	MAD	3	3	FALSE
HTP0087B	Plasma	SciLifeLab peptide array	CARS_HPRR400046	HLFEQYREKRPEAAQLLEDVQAALKPFSVKLNETTDPDKKQMLERIQHAVQLATEPLEKAVQSRLTGEEVNSCVEVLLEEAKDLLSDWLDSTLGCDVTDNSIFSKLPKFWEGDFHRDMEALNVLPPDVL	CARS	P49589	MAD	-1	4	FALSE
HTP0087B	Plasma	SciLifeLab peptide array	CASR_HPRR3140049	ADDDYGRPGIEKFREEAEERDICIDFSELISQYSDEEEIQHVVEVIQNSTAKVIVVFSSGPDLEPLIKEIVRRNITGKIWLASEAWASSSLI	CASR	P41180	MAD	-1	-1	FALSE
HTP0087B	Plasma	SciLifeLab peptide array	CASR_HPRR3140052	GTVTFSLSFDEPQKNAMAHRNSTHQNSLEAQKSSDTLTRHQPLLPLQCGETDLDLTVQETGLQGPVGGDQRPEVEDPEELSPALVVSSSQSFVISGG	CASR	P41180	MAD	-1	5.2	FALSE
HTP0087B	Plasma	SciLifeLab peptide array	CAST_HPRR3010396	STYIEELGKREVTIPPKYRELLAKKEGITGPPADSSKPIGPDDAIDALSSDFTCGSPTAAGKKTEKEESTEVLKAQSAGTVRSAAP	CAST	P20810	MAD	-1	6.5	FALSE
HTP0087B	Plasma	SciLifeLab peptide array	CAST_HPRR3010397	GPQNASSLKFEDAKLAAAISEVVSQTPASTTQAGAPPRDTSQSDKDLDDALDKLSDSLGQRQPDPDENKPMEDKVKE	CAST	P20810	MAD	-2	42.2	FALSE
HTP0087B	Plasma	SciLifeLab peptide array	CENPA_HPRR3730167	PSLGASSHQHSRRRQGWLKEIRKLQKSTHLL	CENPA	P49450	MAD	-1	0	FALSE
HTP0087B	Plasma	SciLifeLab peptide array	CENPA_HPRR3890121	RKLPFSRLAREICVKFTRGVDFNWQAQALLAL	CENPA	P49450	MAD	1	2.1	FALSE
HTP0087B	Plasma	SciLifeLab peptide array	CENPB_HPRR3310037	ERGVVQQVKGHYRQAMLLKAMAALEGQDPSGLQLGLTEALHFVAAAWQAVEPSDIAACFREAGFGGGPNATITTSL	CENPB	P07199	MAD	0	1.1	FALSE
HTP0087B	Plasma	SciLifeLab peptide array	CENPB_HPRR3310039	TFREKSRIIQEVEENPDLRKGEIARRFNIPPSTLSTILKNKRAILASERKYGVASTCRKTNKLSPYDKLEGLLIAWFQQIRAAGLPVKGIIL	CENPB	P07199	MAD	-1	0	FALSE
HTP0087B	Plasma	SciLifeLab peptide array	CENPE_HPRR1470072	EKIENLTRMLVTSSSLTLQQELKAKRKRRVTWCLGKINKMKNSNYADQFNIPTNITTKTHKLSINLLREIDESVCSESDVFSNTLDTLSEIEWNPATKLLNQENIESELNSLRADYDN	CENPE	Q02224	MAD	0	3.1	FALSE
HTP0087B	Plasma	SciLifeLab peptide array	CENPE_HPRR4340147	MRVKANLSLPYLQTKHIEKLFTANQRCSMEFHRIMKKLKYVLSYVTKIKEEQHESINKFEMDFIDEVEKQKELLIKIQHLQQDCDVPSRELRDLKLNQNMD	CENPE	Q02224	MAD	0	0.1	FALSE
HTP0087B	Plasma	SciLifeLab peptide array	CENPF_HPRR1390029	SCWKSENEKLLTQMESEKENLQSKINHLETCLKTQQIKSHEYNERVRTLEMDRENLSVEIRNLHNVLDSKSVEVETQKLAYMELQQKAEFSDQKHQKEIENMCLKTSQLTGQVEDLEHKLQLLSNEIMDKDRCYQDLHAEYE	CENPF	P49454	MAD	74	96.8	FALSE
HTP0087B	Plasma	SciLifeLab peptide array	CENPF_HPRR1390030	CISELSFSGPNALVPMDFLGNQEDIHNLQLRVKETSNENLRLLHVIEDRDRKVESLLNEMKELDSKLHLQEVQLMTKIEACIELEKIVGELKKENSDLSEKLEYFSCDHQEL	CENPF	P49454	MAD	-1	2	FALSE
HTP0087B	Plasma	SciLifeLab peptide array	CHD3_HPRR3420199	LKIKLGLLGGKREKGGSYVFQSDEGPEPEAEESDLDSGSVHSASGRPDGPVRTKKLKRGRPGRKKKKLLGCPA	CHD3	Q12873	MAD	0	1	FALSE
HTP0087B	Plasma	SciLifeLab peptide array	CHGA_HPRR300004	NSPMNKGDTEVMKCIVEVISDTLSKPSPMPVSQECFETLRGDERILSILRHQNLLKELQDLALQGAKERAHQQKKHSGFEDELSEVLENQSSQAELKEAVEEPSSKDVMEKREDSKEAEKSGEATDGARPQALPEPMQESK	CHGA	P10645	MAD	1	17.4	FALSE
HTP0087B	Plasma	SciLifeLab peptide array	CHRNA1_HPRR4110442	MKLGTWTYDGSVVAINPESDQPDLSNFMESGEWVIKESRGWKHSVTYSCCPDTPYLDITYHF	CHRNA1	P02708	MAD	3	3	FALSE
HTP0087B	Plasma	SciLifeLab peptide array	CLDN11*_HPRR2010004	NDWVVTCGYTIPTCRKLDELGSKGLWADCVMATGLYHCKPLVDILILPGY	CLDN11*	O75508	MAD	0	1	FALSE
HTP0087B	Plasma	SciLifeLab peptide array	CLDN11_HPRR2010005	DAQAFGENRFYYTAGSSSPTHAKSAHV	CLDN11	O75508	MAD	-1	3.3	FALSE
HTP0087B	Plasma	SciLifeLab peptide array	CNP_HPRR2500894	TLARVIVDKYRDGTKMVSADAYKITPGARGAFSEEYKRLDEDLAAYCRRRDIRILVLDDTNHERERLEQLFEMADQYQYQVVLVEPKTAWRLDCAQLKEKNQW	CNP	P09543	MAD	4	21.4	FALSE
HTP0087B	Plasma	SciLifeLab peptide array	CNP_HPRR2500896	PGVLHCTTKFCDYGKAPGAEEYAQQDVLKKSYSKAFTLTISALFVTPKTTGARVELSEQQLQLWPSDVDKLSPTDNLPRGSRAHITL	CNP	P09543	MAD	3	38.5	FALSE
HTP0087B	Plasma	SciLifeLab peptide array	COL17A1_HPRR3500044	NLPSHVWSSTLPAGSSMGTYHNNMTTQSSSLLNTNAYSAGSVFGVPNNMASCSPTLHPGLSTSSSVFGMQNNLAPSLTTLSHGTTTTSTA	COL17A1	Q9UMD9	MAD	-1	0	FALSE
HTP0087B	Plasma	SciLifeLab peptide array	COL17A1_HPRR3500046	DGTEVTERIVTETVTTRLTSLPPKGGTSNGYAKTASLGGGSRLEKQSLTHGSSGYINSTGSTRGHASTSSYRRAHSPASTLPNSPGSTFERKTHVTR	COL17A1	Q9UMD9	MAD	5	10	FALSE
HTP0087B	Plasma	SciLifeLab peptide array	CPE_HPRR270004	VLSANLHGGDLVANYPYDETRSGSAHEYSSSPDDAIFQSLARAYSSFNPAMSDPNRPPCRKNDDDSSFVDGTTNGGAWYSVPGGMQDFNYLSSNCFEITVELSCEKFPPEETLKTYWEDNKNSLISYLEQIHR	CPE	P16870	MAD	5	5.1	FALSE
HTP0087B	Plasma	SciLifeLab peptide array	CPE_HPRR4180113	GNYKLTASAPGYLAITKKVAVPYSPAAGVDFELESFSERKEEEKEELMEWWKMMS	CPE	P16870	MAD	8	56.3	FALSE
HTP0087B	Plasma	SciLifeLab peptide array	CRYAB_HPRR2700063	RPFFPFHSPSRLFDQFFGEHLLESDLFPTSTSLSPFYLRPPSFLRAPSWFDTGLSEMRLEKDRFSVNLDVKHFSPEELKVKVLGDVIE	CRYAB	P02511	MAD	1	1	FALSE
HTP0087B	Plasma	SciLifeLab peptide array	CRYAB_HPRR3880249	KYRIPADVDPLTITSSLSSDGVLTVNGPRKQVSGPERTIPITREEKPAVTAA	CRYAB	P02511	MAD	0	7	FALSE
HTP0087B	Plasma	SciLifeLab peptide array	CYP11A1_HPRR2120012	RSVLVKGCQTFLSAPREGLGRLRVPTGEGAGISTRSPRPFNEIPSPGDNGWLNLYHFWRETGTHKVHLHHVQNFQKYGPIYREKLGNVESVYVIDPEDVALLFKSEGPNPERFLIPPWVAYHQYYQRPIGVLLKKSAA	CYP11A1	P05108	MAD	1	1	FALSE
HTP0087B	Plasma	SciLifeLab peptide array	CYP17A1_HPRR670228	PFLPRHGHMHNNFFKLQKKYGPIYSVRMGTKTTVIVGHHQLAKEVLIKKGKDFSGRPQMATLDIASNNRKGIAFADSGAHWQLHRRLAMATFALFKDGDQKLEKIICQEISTLCDMLATHNGQSIDISFPVFVAVTNVISL	CYP17A1	P05093	MAD	-1	0	FALSE
HTP0087B	Plasma	SciLifeLab peptide array	CYP1A2_HPRR2760237	YQDFDKNSVRDITGALFKHSKKGPRASGNLIPQEKIVNLVNDIFGAGFDTVTTAISWSLMYLVTKPEIQRK	CYP1A2	P05177	MAD	0	1.1	FALSE
HTP0087B	Plasma	SciLifeLab peptide array	CYP21A2_HPRR3440127	LIGGTETTANTLSWAVVFLLHHPEIQQRLQEELDHELGPGASSSRVPYKDRARLPLLNATIAEV	CYP21A2	P08686	MAD	-1	1	FALSE
HTP0087B	Plasma	SciLifeLab peptide array	CYP21A2_HPRR3440129	GLTQKFGPIYRLHLGLQDVVVLNSKRTIEEAMVKKWADFAGRPEPLTYKLVSRNYPDLSLGDYSLLW	CYP21A2	P08686	MAD	0	0	FALSE
HTP0087B	Plasma	SciLifeLab peptide array	CYP2D6_HPRR3440145	EYDDPRFLRLLDLAQEGLKEESGFLREVLNAVPVLLHIPALAGKVLRFQKAFLTQLDELLTEHRMTWDPAQPPRDLTE	CYP2D6	P10635	MAD	0	2	FALSE
HTP0087B	Plasma	SciLifeLab peptide array	CYP2D6_HPRR3440146	KGTTLITNLSSVLKDEAVWKKPFRF	CYP2D6	P10635	MAD	-1	6.1	FALSE
HTP0087B	Plasma	SciLifeLab peptide array	DARS_HPRR2370049	DKYPLAVRPFYTMPDPRNPKQSNSYDMFMRGEEILSGAQRIHDPQLLTERALHHGIDLEKIKAYIDSFRFGAPPHAGGGIGLERVTMLFLGLHNVRQTSMFPRD	DARS	P14868	MAD	3	5	FALSE
HTP0087B	Plasma	SciLifeLab peptide array	DARS_HPRR2370051	LHVQKIYVISLAEPRLPLQLDDAVRPEAEGEEEGRATVNQDTRLDNRVIDLRTSTSQAVFRLQSGICHLFRETLINKGFVEIQTPKIISAASEGGANVFTVSYFKNNAYLAQSPQLYKQMCICAD	DARS	P14868	MAD	9	10	FALSE
HTP0087B	Plasma	SciLifeLab peptide array	DBT_HPRR2550879	YVCFFGYPSFKYSHPHHFLKTTAALRGQVVQFKLSDIGEGIREVTVKEWYVKEGDTVSQFDSICEVQSDKASVTI	DBT	P11182	MAD	0	2	FALSE
HTP0087B	Plasma	SciLifeLab peptide array	DBT_HPRR2550880	VGKPLVDIETEALKDSEEDVVETPAVSHDEHTHQEIKGRKTLATPAVRRLAMENNIKLSEVVGSGKDGRILKEDILNYLEKQ	DBT	P11182	MAD	2	10.1	FALSE
HTP0087B	Plasma	SciLifeLab peptide array	DBT_HPRR2550882	LQFPILNASVDENCQNITYKASHNIGIAMDTEQGLIVPNVKNVQICSIFDIATELNRLQKLGSVGQLSTTDLTGGTFTLSNIGSIGGTFAKPVIMPPEVAIGA	DBT	P11182	MAD	-1	7.9	FALSE
HTP0087B	Plasma	SciLifeLab peptide array	DLAT_HPRR3050438	LLPALSPTMTMGTVQRWEKKVGEKLSEGDLLAEIETDKATIGFEVQEEGYLAKILVPEGTRDVPLGTPLCIIVEKEADISAFADYRPTEVTDLKPQVPPPT	DLAT	P10515	MAD	-2	49.5	FALSE
HTP0087B	Plasma	SciLifeLab peptide array	DLST_HPRR140690	QNTCAMLTTFNEIDMSNIQEMRARHKEAFLKKHNLKLGFMSAFVKASAFALQEQPVVNAVIDDTTKEVVYRDYIDISVAVATPRGLVVPVIRNVEAMNFADIERTITELGEKARKNELAIEDMDGGTFTISNGGVFGSLFGTPII	DLST	P36957	MAD	-1	1	FALSE
HTP0087B	Plasma	SciLifeLab peptide array	DLST_HPRR4210012	PLCVSGVQPLALRLPEGELPSRETFPACINNS	DLST	P36957	MAD	0	0.1	FALSE
HTP0087B	Plasma	SciLifeLab peptide array	DPF2_HPRR2250142	SFPSIKPDTDQTLKKEGLISQDGSSLEALLRTDPLEKRGAPDPRVDDDSLGEFPVTNSRARKRILEPDDFLDDLDDEDYEEDTPKRRGKGKSKGKGVGS	DPF2	Q92785	MAD	22	11.1	TRUE
HTP0087B	Plasma	SciLifeLab peptide array	DPF2_HPRR3890698	AEEEGEDKEDSQPPTPVSQRSEEQKSKKGPDGLALPNNY	DPF2	Q92785	MAD	-1	1	FALSE
HTP0087B	Plasma	SciLifeLab peptide array	DSC1_HPRR1950849	SCTGTLVVHLDDYNDHAPQIDKEVTICQNNEDFAVLKPVDPDGPENGPPFQFFLDNSASKNWNIEEKDGKTAILRQRQNLDYNYYSVPIQIKDRHGLVATHMLTVRVCDCSTPSECRMKDKSTR	DSC1	Q08554	MAD	0	5.6	FALSE
HTP0087B	Plasma	SciLifeLab peptide array	DSG1_HPRR1370121	SLQLSIGVRNKAEFHHSIMSQYKLKASAISVTVLNVIEGPVFRPGSKTYVVTGNMGSNDKVGDFVATDLDTGRPSTTVRYVMGNNPADLLAVDSRTGKLTLKNKVTKEQYNMLGGKYQGTILSIDDNLQRTCTGT	DSG1	Q02413	MAD	2	2	FALSE
HTP0087B	Plasma	SciLifeLab peptide array	DSG1_HPRR4180926	EPVPECSDGAIHSWAVEGPQPEPRDITTVIPQIPPDNANIIECIDNSGVYTNEYGGREMQDLGGGERMTGFELTEGVKTSGMPEICQEYSG	DSG1	Q02413	MAD	-1	10.5	FALSE
HTP0087B	Plasma	SciLifeLab peptide array	DSG3_HPRR3120202	FRPASKTFTVQKGISSKKLVDYILGTYQAIDEDTNKAASNVKYVMGRNDGGYLMIDSKTAEIKFVKNMNRDSTFIVNKTITAEVLAIDEYTGKTSTGTVYVRVPDFND	DSG3	P32926	MAD	3	6	FALSE
HTP0087B	Plasma	SciLifeLab peptide array	DSG3_HPRR3120203	SSPSVVVSARTLNNRYTGPYTFALEDQPVKLPAVWSITTLNATSALLRAQEQIPPGVYHISLVLTDSQNNRCEMPRSLTLEVCQCDNRGICGTSY	DSG3	P32926	MAD	0	1	FALSE
HTP0087B	Plasma	SciLifeLab peptide array	DST_HPRR2620326	KPRCQNVAEDMDIQLCASILNENSDENENINTMILLDKMHSCSSLEKQQRVNVVQLASPSENNLVTEKSNLPEYTTEIAGKSKENLLNHE	DST	Q03001	MAD	-1	28.3	FALSE
HTP0087B	Plasma	SciLifeLab peptide array	DST_HPRR2620328	MLPGEHQQVLSNLQSRFEDFLEDSQESQVFSGSDITQLEKEVNVCKQYYQELLKSAEREEQEESVYNLYISEVRNIRLRLENCEDRLIRQIRTPLERDDLHESVF	DST	Q03001	MAD	-1	4.2	FALSE
HTP0087B	Plasma	SciLifeLab peptide array	EGFR_HPRR290109	QQGFFSSPSTSRTPLLSSLSATSNNSTVACIDRNGLQSCPIKEDSFLQRYSSDPTGALTEDSIDDTFLPVPEYINQSVPKRPAGSVQNPVYHNQPLNPAPSRDPHYQDPHSTAVGNPEYLNTVQPTCVNSTFDSPAHWAQKGSHQISLD	EGFR	P00533	MAD	0	25.1	FALSE
HTP0087B	Plasma	SciLifeLab peptide array	ENO3*_HPRR3360053	DGTENKSKFGANAILGVSLAVCKAG	ENO3*	P13929;P09104;P06733	MAD	-1	0	FALSE
HTP0087B	Plasma	SciLifeLab peptide array	ENO3*_HPRR4290181	QACKLAQENGWGVMVSHRSGETEDTFIADLVVGLCTGQIKTGAPCRSERLAKYNQLMRIEEE	ENO3*	P13929;P09104;P06733	MAD	0	0.1	FALSE
HTP0087B	Plasma	SciLifeLab peptide array	ENO3*_HPRR4370068	LKNVIKEKYGKDATNVGDEGGFAPNIL	ENO3*	P13929;P09104;P06733	MAD	-1	10.1	FALSE
HTP0087B	Plasma	SciLifeLab peptide array	ENO3_HPRR252476	ALELLKTAIQAAGYPDKVVIGMDVAASEFYRNGKYDLDFKSPDDPARHITGEKLGELYKSFIKNYPVVSIEDPFDQDDWATWTSFLSGVNIQIVGDDLTVTN	ENO3	P13929	MAD	6	6	FALSE
HTP0087B	Plasma	SciLifeLab peptide array	F12_HPRR350057	YHKCTHKGRPGPQPWCATTPNFDQDQRWGYCLEPKKVKDHCSKHSPCQKGGTCVNMPSGPHCLCPQHLTGNHCQKEKCFEPQLLRFFHKNEIWYRTEQAAVARCQCKGPDA	F12	P00748	MAD	-1	-0.9	FALSE
HTP0087B	Plasma	SciLifeLab peptide array	F2_HPRR350027	VRRQECSIPVCGQDQVTVAMTPRSEGSSVNLSPPLEQCVPDRGQQYQGRLAVTTHGLPCLAWASAQAKALSKHQDFNSAVQLVENFCRNPDGDEEGVWCYVAGKPGDFGYCDLNY	F2	P00734	MAD	3	4	FALSE
HTP0087B	Plasma	SciLifeLab peptide array	F2_HPRR3790030	EGVWCYVAGKPGDFGYCDLNYCEEAVEEETGDGLDEDSDRAIEGRTATSEYQTFFNPRTFGSGEADCGLRPLFEKKSLE	F2	P00734	MAD	1	22.5	FALSE
HTP0087B	Plasma	SciLifeLab peptide array	F2_HPRR3790031	FEALESSTATDVFWAKYTACETARTPRDKLAACLEGNCAEGLGTNYRGHVNITRSGIECQLWRSRYPHKPEINSTTHPGADLQ	F2	P00734	MAD	-1	7.6	FALSE
HTP0087B	Plasma	SciLifeLab peptide array	F8_HPRR232500	FTQPLYRGELNEHLGLLGPYIRAEVEDNIMVTFRNQASRPYSFYSSLISYEEDQRQGAEPRKNFVKPNETKTYFWKVQHHMAPTKDEFDCKAWAYFSDVDLEKDVHSGLIGPLLVCHTNTLNPAHGRQVTVQEFAL	F8	P00451	MAD	3	4.1	FALSE
HTP0087B	Plasma	SciLifeLab peptide array	F8_HPRR232926	ESKAISDAQITASSYFTNMFATWSPSKARLHLQGRSNAWRPQVNNPKEWLQVDFQKTMKVTGVTTQGVKSLLTSMYVKEFLISSSQDGHQWTLFFQNGKVKVFQGNQDSFTPVVNSLDPPLLTRYLRIHPQSWVHQIALRMEVLGCEA	F8	P00451	MAD	0	0	FALSE
HTP0087B	Plasma	SciLifeLab peptide array	FARS2_HPRR2010057	GTPLFSVYDNLSPVVTTWQNFDSLLIPADHPSRKKGDNYYLNRTHMLRAHTSAHQWDLLHAGLDAFLVVGDVYRRDQIDSQHYPIFHQLEAVRLFSKHELFAGIKDGES	FARS2	O95363	MAD	0	1	FALSE
HTP0087B	Plasma	SciLifeLab peptide array	FARSA_HPRR400146	EVIEAELRSTKHWELTAEGEEIAREGSHEARVFRSIPPEGLAQSELMRLPSGKVGFSKAMSNKWIRVDKSAADGPRVFRVVDSMEDEVQRRLQLVRGGQAEKLGEKERSELRKRKLLAEVTLKTYWVSKG	FARSA	Q9Y285	MAD	-2	1	FALSE
HTP0087B	Plasma	SciLifeLab peptide array	FHL1_HPRR252319	RFTAVEDQYYCVDCYKNFVAKKCAGCKNPITGFGKGSSVVAYEGQSWHDYCFHCKIRRAPPLSNN	FHL1	Q13642	MAD	-2	-1	FALSE
HTP0087B	Plasma	SciLifeLab peptide array	FLG_HPRR2551092	SERWSGSASRNHLGSAWEQSRDGSRHPGSHHEDRAGHGHSADSSRQSGTRHTESSSRGQAASSHEQARSSAGERHGSRHQLQSA	FLG	P20930	MAD	8	12	FALSE
HTP0087B	Plasma	SciLifeLab peptide array	FLG_HPRR2551093	SADSSRQSGTPHAETSSGGQAASSHEQARSSPGERHGSRHQQSADSSRHSGIPRRQASSAVRDSGHWGSSGSQASDSEGHSEESDTQSVSGHGQDGPHQQSHQESAR	FLG	P20930	MAD	0	1	FALSE
HTP0087B	Plasma	SciLifeLab peptide array	FLG_HPRR2551094	RKRLSERLEEKEDNEEGVYDYENTGRMTQKWIQSGHIATYYTIQDEAYDTTDSLLEENKIYERSRSSDGKSSSQVNRSRHENTSQVPLQESR	FLG	P20930	MAD	14	14	FALSE
HTP0087B	Plasma	SciLifeLab peptide array	FLNA_HPRR232447	VICVRFGGEHVPNSPFQVTALAGDQPSVQPPLRSQQLAPQYTYAQGGQQTWAPERPLVGVNGLDVTSLRPFDLVIPFTIKKGEITGEVRMPSGKVAQPTITDNKDGTVTVRYAPSEAGLHEMDIRYDNMHIPGSPLQFYVDYVNCGHVT	FLNA	P21333	MAD	0	2	FALSE
HTP0087B	Plasma	SciLifeLab peptide array	FLNB_HPRR1310070	HGKVGEAGLLSVDCSEAGPGALGLEAVSDSGTKAEVSIQNNKDGTYAVTYVPLTAGMYTLTMKYGGELVPHFPARVKVEPAVDTSRIKVFGPGIEGKDVFREATTDFTV	FLNB	O75369	MAD	-1	7.1	FALSE
HTP0087B	Plasma	SciLifeLab peptide array	FLNC_HPRR1310054	DPVPKSPFVVNVAPPLDLSKIKVQGLNSKVAVGQEQAFSVNTRGAGGQGQLDVRMTSPSRRPIPCKLEPGGGAEAQAVRYMPPEEGPYKVDITYDGHPVPGSPFAVEGVLPPDPSKVC	FLNC	Q14315	MAD	0	17.2	FALSE
HTP0087B	Plasma	SciLifeLab peptide array	FLNC_HPRR1310055	HSLHETSTVLVETVTKSSSSRGSSYSSIPKFSSDASKVVTRGPGLSQAFVGQKNSFTVDCSKAGTNMMMVGVHGPKTPCEEVYVKHMGNRVYNVTYTVKEKGDY	FLNC	Q14315	MAD	1	2	FALSE
HTP0087B	Plasma	SciLifeLab peptide array	FN1_HPRR2050095	AQQMVQPQSPVAVSQSKPGCYDNGKHYQINQQWERTYLGNALVCTCYGGSRGFNCESKPEAEETCFDKYTGNTYRVGDTYERPKDSMIWDCTCIGAGRGRISCTIANRCHEGGQSYKIGDTWRRPHETGGYMLECVCLGNGKGEW	FN1	P02751	MAD	-1	1	FALSE
HTP0087B	Plasma	SciLifeLab peptide array	FN1_HPRR2050096	HEEICTTNEGVMYRIGDQWDKQHDMGHMMRCTCVGNGRGEWTCIAYSQLRDQCIVDDITYNVNDTFHKRHEEGHMLNCTCFGQGRGRWKCDPVDQCQDSETGTFYQIGDSWEKYVHGVRYQCYCYGRGIG	FN1	P02751	MAD	2	2	FALSE
HTP0087B	Plasma	SciLifeLab peptide array	FTCD_HPRR2280077	MRLPKNIPEEKDRRTAALQEGLRRAVSVPLTLAETVASLWLALQELARCGNLACRSDLQVAAKALEMGVFGAYFNVLINLRDITDEAFKDQIHHRV	FTCD	O95954	MAD	1	2	FALSE
HTP0087B	Plasma	SciLifeLab peptide array	FTCD_HPRR2890163	GVSVDECVLCAQAFGQRLAEELDVPVYLYGEAARMDSRRTLPAIRAGEYEALPKKLQQADWAPDFGPSSF	FTCD	O95954	MAD	2	115.6	FALSE
HTP0087B	Plasma	SciLifeLab peptide array	FTCD_HPRR2890164	MSQLVECVPNFSEGKNQEVIDAISGAITQTPGCVLLDVDAGPSTNRTVYTFVGPPECVVEGALNAARVASRLIDMSRHQGEH	FTCD	O95954	MAD	0	4.1	FALSE
HTP0087B	Plasma	SciLifeLab peptide array	FTCD_HPRR2890165	TKEQAHRIALNLREQGRGKDQPGRLKKVQGIGWYLDEKNLAQVSTNLLDFEVTALHTVYEETCREAQELSLPVVGSQLVGLVPLKALLD	FTCD	O95954	MAD	-1	1	FALSE
HTP0087B	Plasma	SciLifeLab peptide array	G6PC2_HPRR4090002	INSEMFLLSCRGGNNYTLSF	G6PC2	Q9NQR9	MAD	0	2	FALSE
HTP0087B	Plasma	SciLifeLab peptide array	GAD1_HPRR2920425	QSSKNLLSCENSDRDARFRRTETDFSNLFARDLLPAKNGEEQTVQFLLEVVDILLNYVRKTFDRS	GAD1	Q99259	MAD	0	1	FALSE
HTP0087B	Plasma	SciLifeLab peptide array	GAD1_HPRR2920426	SSATSSNAGADPNTTNLRPTTYDTWCGVAHGCTRKLGLKICGFLQRTNSLEEKSRLVSAFKER	GAD1	Q99259	MAD	10	0	TRUE
HTP0087B	Plasma	SciLifeLab peptide array	GAD2_HPRR3020281	SGFWSFGSEDGSGDSENPGTARAWCQVAQKFTGGIGNKLCALLYGDAEKPAESGGSQPPRAAARKAACACDQKPCSCSKVDVNYAFLHATDLLP	GAD2	Q05329	MAD	-1	-0.9	FALSE
HTP0087B	Plasma	SciLifeLab peptide array	GAD2_HPRR3890856	STKVIDFHYPNELLQEYNWELADQPQNLEEILMHCQTTLKYAIKTGHPRY	GAD2	Q05329	MAD	-1	0	FALSE
HTP0087B	Plasma	SciLifeLab peptide array	GARS_HPRR2440240	KLMSDKKCSVEKKSEMESVLAQLDNYGQQELADLFVNYNVKSPITGNDLSPPVSFNLMFKTFIGPGGNMPGYLRPETAQGIFLNFKRLLEFNQGKLPFAAAQI	GARS	P41250	MAD	2	3	FALSE
HTP0087B	Plasma	SciLifeLab peptide array	GARS_HPRR2440243	LPLSQNQEFMPFVKELSEALTRHGVSHKVDDSSGSIGRRYARTDEIGVAFGVTIDFDTVNKTPHTATLRDRDSMRQIRAEISELPSIVQDLANGNITWADVEARYPLFEG	GARS	P41250	MAD	2	7.1	FALSE
HTP0087B	Plasma	SciLifeLab peptide array	GIF_HPRR3050322	LFGQVLKDIVEKISMKIKDNGIIGDIYSTGLAMQALSVTPEPSKKEWNCKKTTDMILNEIKQGKFHNPMSIAQILPSLKGKTYLDVPQVTCSPDHEVQPTLPSNP	GIF	P27352	MAD	3	1.1	TRUE
HTP0087B	Plasma	SciLifeLab peptide array	GIF_HPRR3050324	TSSAYPNPSILIAMNLAGAYNLKAQKLLTYQLMSSDNNDLTIGQLGLTIMALTSSCRDPGDKVSILQRQMENWAPSSPNAEASAFYGPSLAILALCQKNS	GIF	P27352	MAD	0	1.1	FALSE
HTP0087B	Plasma	SciLifeLab peptide array	GLRA1_HPRR2140062	LLRFRRKRRHHKEDEAGEGRFNFSAYGMGPACLQAKDGISVKGANNSNTTNPPPAPSKSPEEMRKLFIQRAKKIDK	GLRA1	P23415	MAD	1	2.1	FALSE
HTP0087B	Plasma	SciLifeLab peptide array	GOLGB1_HPRR1951658	RLSGLANVVLHELSGDDDTDQNMRAPLDPELHQESDMEFNNTTQEDVQERLAYAEQLVVELKDIIRQKDVQLQQKDEALQEERKAADNKIKKLKLHAKAKLTSLNKYIEEMKAQGGTVLPTEPQSEEQLSKHD	GOLGB1	Q14789	MAD	-1	-1	FALSE
HTP0087B	Plasma	SciLifeLab peptide array	GOLGB1_HPRR1951659	KHDNQTNVTEEGTQSIPGETEEQDSLSMSTRPTCSESVPSAKSANPAVSKDFSSHDEINNYLQQIDQLKERIAGLEEEKQKNKEFSQTLENEKNTLLSQISTKDGELKMLQEEVTKMNLLNQQIQEELS	GOLGB1	Q14789	MAD	2	6.2	FALSE
HTP0087B	Plasma	SciLifeLab peptide array	GPR62_HPRR2770122	PVRLALGRLSRRALPGPVRACTPQAWHPRALLQCLQRPPEGPAVGPSEAPEQTPELAGGRSPAYQGPPESSL	GPR62	Q9BZJ7	MAD	102	39.3	TRUE
HTP0087B	Plasma	SciLifeLab peptide array	GYPA_HPRR2110422	TSSSVTKSYISSQTNDTHKRDTYAATPRAHEVSEISVRTVYPPEEETGERVQLAHHFSEP	GYPA	P02724	MAD	1	3	FALSE
HTP0087B	Plasma	SciLifeLab peptide array	GYPE*_HPRR3290141	TTGVAMHTSTSSSVTKSYISSQTN	GYPE*	P15421;P06028;P02724	MAD	-1	0	FALSE
HTP0087B	Plasma	SciLifeLab peptide array	HARS_HPRR3010485	MAERAALEELVKLQGERVRGLKQQKASAELIEEEVAKLLKLKAQLGPDESKQKFVLKTPKGTRD	HARS	P12081	MAD	5	6.1	FALSE
HTP0087B	Plasma	SciLifeLab peptide array	HARS_HPRR4040036	DGVIKLRSVTSREEVDVRREDLVEEIKRRTGQPLCIC	HARS	P12081	MAD	0	3.1	FALSE
HTP0087B	Plasma	SciLifeLab peptide array	HDC_HPRR1320013	LKGPNCLTENVLKEIAKAGRLFLIPATIQDKLIIRFTVTSQFTTRDDILRDWNLIRDAATLILSQHCTSQPSPRVGNLISQIRGARAWACGTSLQSVSGAGDDPVQARKIIKQPQRVGAGPMKRENGLHLETLLDPVDDCFSE	HDC	P19113	MAD	-2	0	FALSE
HTP0087B	Plasma	SciLifeLab peptide array	HDC_HPRR1320014	PALTSWPSLLGDMLADAINCLGFTWASSPACTELEMNVMDWLAKMLGLPEHFLHHHPSSQGGGVLQSTVSESTLIALLAARKNKILEMKTSEPDADESCLNARLVAYASDQAHSSVEK	HDC	P19113	MAD	-2	4.1	FALSE
HTP0087B	Plasma	SciLifeLab peptide array	HINT2_HPRR2470372	GQVRGAAGVTDGNEVAKAQQATPGGAAPTIFSRILDKSLPADILYEDQQCLVFRDVAPQAPVHFLVIPKKP	HINT2	Q9BX68	MAD	1	3	FALSE
HTP0087B	Plasma	SciLifeLab peptide array	HINT2_HPRR2470373	IPRISQAEEEDQQLLGHLLLVAKQTAKAEGLGDGYRLVINDGKLGAQSVYHLHIHVLGGRQLQWP	HINT2	Q9BX68	MAD	1	0	TRUE
HTP0087B	Plasma	SciLifeLab peptide array	HMGCR_HPRR650031	MAGSIGGYNAHAANIVTAIYIACGQDAAQNVGSSNCITLMEASGPTNEDLYISCTMPSIEIGTVGGGTNLLPQQACLQMLGVQGACKDNPGENARQLARIVCGTVMAGELSLMAALAAGHLVKSHMIHNRSKINLQDLQG	HMGCR	P04035	MAD	3	2.1	TRUE
HTP0087B	Plasma	SciLifeLab peptide array	IAPP_HPRR3830128	LVHSSNNFGAILSSTNVGSNTYGKRNAVEVLKREPLNYLP	IAPP	P10997	MAD	-2	1	FALSE
HTP0087B	Plasma	SciLifeLab peptide array	IARS_HPRR2470884	NWYVRMNRRRLKGENGMEDCVMALETLFSVLLSLCRLMAPYTPFLTELMYQNLKVLIDPVSVQDKDTLSIHYLMLPRVREELIDKKTESAVSQMQSVIEL	IARS	P41252	MAD	-1	4.3	FALSE
HTP0087B	Plasma	SciLifeLab peptide array	IARS_HPRR2470886	AREVINRIQKLRKKCNLVPTDEITVYYKAKSEGTYLNSVIESHTEFIFTTIKAPLKPYPVSPSDKVLIQEKTQLKGSELEITLTRGSSLPGPACAYVNLNICANGSEQGGVLL	IARS	P41252	MAD	0	1	FALSE
HTP0087B	Plasma	SciLifeLab peptide array	ICA1_HPRR1510003	DELLDMKSEEGACLGPVAGTPEPEGADKDDLLLLSEIFNASSLEEGEFSKEWAAVFGDGQVKEPVPTMALGEPDPKAQTGSGFLPSQLLDQNMKDLQASLQEPAKAASDLTAWFSLFADLDPLSNPDAVGKTDKEHELL	ICA1	Q05084	MAD	3	78.4	FALSE
HTP0087B	Plasma	SciLifeLab peptide array	ICA1_HPRR4160047	HESFKGYQPYEFTTLKSLQDPMKKLVEKEEKKKINQQESTDAAVQEPSQLISLEEENQRKESSSFK	ICA1	Q05084	MAD	3	38.8	FALSE
HTP0087B	Plasma	SciLifeLab peptide array	IFIH1_HPRR330271	GWTREFVEALRRTGSPLAARYMNPELTDLPSPSFENAHDEYLQLLNLLQPTLVDKLLVRDVLDKCMEEELLTIEDRNRIAAAENNGNESGVRELLKRIVQKENWFSAFLNVLRQTGNNELVQELTGSDCSESNAEIENLSQVDGPQVEEQ	IFIH1	Q9BYX4	MAD	2	4.1	FALSE
HTP0087B	Plasma	SciLifeLab peptide array	IFNA21*_HPRR3360011	MNADSILAVKKYFRRITLYLTEKKYSPCA	IFNA21*	P01568;P05014;P01567;P01566;P05015;P01571;P01570;P01569;P05013;P01562;P01563;P32881	MAD	8	1	TRUE
HTP0087B	Plasma	SciLifeLab peptide array	IFNA21*_HPRR3360040	AEAISVLHEVIQQTFNLFSTKDSSVA	IFNA21*	P01568;P05014;P01567;P01566;P05015;P01571;P01570;P01569;P05013;P01562;P01563;P32881	MAD	-2	-1	FALSE
HTP0087B	Plasma	SciLifeLab peptide array	IFNB1_HPRR2760323	ETIVENLLANVYHQINHLKTVLEEKLEKEDFTRGKLMSSLHLKRYYGRILHYLKAKEYSHCAWTIVRVEILRNFYFINR	IFNB1	P01574	MAD	0	1	FALSE
HTP0087B	Plasma	SciLifeLab peptide array	IFNB1_HPRR2760324	YNLLGFLQRSSNFQCQKLLWQLNGRLEYCLKDRMNFDIPEEIKQLQQFQKEDAALTIYEMLQNIFAIFRQDSSSTGWN	IFNB1	P01574	MAD	1	2	FALSE
HTP0087B	Plasma	SciLifeLab peptide array	IFNL1_HPRR3790181	PVPTSKPTTTGKGCHIGRFKSLSP	IFNL1	Q8IU54	MAD	0	1.2	FALSE
HTP0087B	Plasma	SciLifeLab peptide array	IFNL3*_HPRR3260137	AVPVARLRGALPDARGCHIAQFKSLSPQE	IFNL3*	Q8IZI9;Q8IZJ0	MAD	-1	-0.9	FALSE
HTP0087B	Plasma	SciLifeLab peptide array	IFNW1*_HPRR3360041	MLLAQMRRISLFSCLKDRHDFRFPQE	IFNW1*	P05000;P01568;P05014;P01567;P01566;P05015;P01571;P01570;P01569;P05013;P01562;P01563;P32881	MAD	-1	2	FALSE
HTP0087B	Plasma	SciLifeLab peptide array	IFNW1_HPRR3780122	AWNMTLLDQLHTGLHQQLQHLETCLLQVVGEGESAGAISSPALTLRRYFQGIRVYLKEK	IFNW1	P05000	MAD	0	0	FALSE
HTP0087B	Plasma	SciLifeLab peptide array	IL17A_HPRR2760112	NPGCPNSEDKNFPRTVMVNLNIHNRNTNTNPKRSSDYYNRSTSPWNLHRNEDPERYPSVIWEAKCRHLGCIN	IL17A	Q16552	MAD	0	1	FALSE
HTP0087B	Plasma	SciLifeLab peptide array	IL17A_HPRR4290151	EILVLRREPPHCPNSFRLEKILVS	IL17A	Q16552	MAD	-1	0	FALSE
HTP0087B	Plasma	SciLifeLab peptide array	IL17F_HPRR2570223	RKIPKVGHTFFQKPESCPPVPGGSMKLDIGIINENQRVSMSRNIESRSTSPWNYTVTWDPNRYPSEVVQAQCRNLGCINAQGKE	IL17F	Q96PD4	MAD	1	23.4	FALSE
HTP0087B	Plasma	SciLifeLab peptide array	IL17F_HPRR4110234	QQETLVVRRKHQGCSVSFQLEKVLVTV	IL17F	Q96PD4	MAD	2	0	TRUE
HTP0087B	Plasma	SciLifeLab peptide array	IL22_HPRR1060056	PISSHCRLDKSNFQQPYITNRTFMLAKEASLADNNTDVRLIGEKLFHGVSMSERCYLMKQVLNFTLEEVLFPQSDRFQPYMQEVVPFLARLSNRLSTCHIEGDDLHIQRNVQKLKDTVKKLGESGEIKAIGELDLLFMSLRNA	IL22	Q9GZX6	MAD	1	2	FALSE
HTP0087B	Plasma	SciLifeLab peptide array	INS_HPRR380034	SHLVEALYLVCGERGFFYTPKTRREAEDLQVGQVELGGGPGAGSLQPLALEGSLQKRGIVEQCCTSICSLYQLENYC	INS	P01308	MAD	-1	2	FALSE
HTP0087B	Plasma	SciLifeLab peptide array	INSM2_HPRR3450147	KHLSTHEAGSARALAPGFGSERGAPLAFACPLCGAHFPTADIREKHRLWHAVREELLLPALAGAPPETSGPSGPSDGSAQQIFSCKHCPSTF	INSM2	Q96T92	MAD	-1	53.4	FALSE
HTP0087B	Plasma	SciLifeLab peptide array	INSM2_HPRR3450148	AEGKENSRIERTADQHPQARDSSGADQHPDSAPRQGLQVLTHPEPPLPQGPYTEGVLGRRVPVPGSTSGGRGSEIFVCP	INSM2	Q96T92	MAD	-1	2	FALSE
HTP0087B	Plasma	SciLifeLab peptide array	KCND1_HPRR230897	SSQPVGPGSLLSSCCPRRAKRRAIRLANSTASVSRGSMQELDMLAGLRRSHAPQSRSSLNAKPHDSLDLNCDSRDFVAAIISIPTPPANTPDESQPSSPGGGGRAGSTLRNSSLGT	KCND1	Q9NSA2	MAD	0	1.1	FALSE
HTP0087B	Plasma	SciLifeLab peptide array	KCND1_HPRR230898	NTLDRYPDTLLGSSEKEFFYDADSGEYFFDRDPDMFRHVLNFYRTGRLHCPRQECIQAFDEELAFYGLVPELVGDCCLEEYRDRKKENAERLAEDEEAEQ	KCND1	Q9NSA2	MAD	9	8.1	TRUE
HTP0087B	Plasma	SciLifeLab peptide array	KCND1_HPRR4320417	KTTCHEFTDELTFSEALGAVSPGGRTSRSTSVSSQPVGPGSLLSSCCPRRAKRRAIRLANSTASVSRGSM	KCND1	Q9NSA2	MAD	0	1	FALSE
HTP0087B	Plasma	SciLifeLab peptide array	KCNJ10_HPRR4030424	EFTPAISLSASGKYIADFSLFDQVVKVASPSGLRDSTVRYGDPEKLKLEESLREQAEKEGSALSVRISNV	KCNJ10	P78508	MAD	0	4	FALSE
HTP0087B	Plasma	SciLifeLab peptide array	KCNJ10_HPRR4030425	MTSVAKVYYSQTTQTESRPLMGPGIRRRRVLTKDGRSNVRMEHIADKRFLYLKDLWTTFIDMQWRY	KCNJ10	P78508	MAD	-1	10.9	FALSE
HTP0087B	Plasma	SciLifeLab peptide array	KCNJ10_HPRR4030426	VAVAHGDLLELDPPANHTPCVVQVHTLTG	KCNJ10	P78508	MAD	0	1.1	FALSE
HTP0087B	Plasma	SciLifeLab peptide array	KCNJ11_HPRR3690159	TVKVPTPLCTARQLDEDHSLLEALTLASARGPLRKRSVPMAKAKPKFSISPDSLS	KCNJ11	Q14654	MAD	-1	0.1	FALSE
HTP0087B	Plasma	SciLifeLab peptide array	KCNJ11_HPRR4080108	YVLTRLAEDPAKPRYRARQRRARFVSKKGNCNVAH	KCNJ11	Q14654	MAD	-2	0	FALSE
HTP0087B	Plasma	SciLifeLab peptide array	KCNJ11_HPRR650098	RLCFMLRVGDLRKSMIISATIHMQVVRKTTSPEGEVVPLHQVDIPMENGVGGNSIFLVAPLIIYHVIDANSPLYDLAPSDLHHHQDLEIIVILEGVVETTGIT	KCNJ11	Q14654	MAD	0	0	FALSE
HTP0087B	Plasma	SciLifeLab peptide array	KEL_HPRR1952469	PRPCETSVCLDLRDHYLASGNTSVAPCTDFFSFACGRAKETNNSFQELATKNKNRLRRILEVQNSWHPGSGEEKAFQFYNSCMDTLAIEAAGTGPLRQVIEELGGWRISGKWT	KEL	P23276	MAD	1	1	FALSE
HTP0087B	Plasma	SciLifeLab peptide array	KEL_HPRR1952470	DQLKEMAPAIDWLSCLQATFTPMSLSPSQSLVVHDVEYLKNMSQLVEEMLLKQRDFLQSHMILGLVVTLSPALDSQFQEARRKLSQKLRELTEQPPMPARPRWMKCVEETGTFFEPTLAALFVREAFGPSTRSAAMKL	KEL	P23276	MAD	1	2	FALSE
HTP0087B	Plasma	SciLifeLab peptide array	LAD1_HPRR1350086	SPRTISFRMKPKKENSETTLTRSASMKLPDNTVKLGEKLERYHTAIRRSESVKSRGLPCTELFVAPVGVASKRHLFEKELAGQSRAEPASSRKENLRLSGVVTSRLNLWISRTQESGDQDPQEAQKASSATERTQWGQKSDSSL	LAD1	O00515	MAD	0	1.1	FALSE
HTP0087B	Plasma	SciLifeLab peptide array	LAMP2_HPRR232315	LELNLTDSENATCLYAKWQMNFTVRYETTNKTYKTVTISDHGTVTYNGSICGDDQNGPKIAVQFGPGFSWIANFTKAASTYSIDSVSFSYNTGDNTTFPDAEDKGILTVDELLAIRIPLNDLFRCNSLSTLEKNDVVQHYWDVLVQA	LAMP2	P13473	MAD	-1	0.1	FALSE
HTP0087B	Plasma	SciLifeLab peptide array	LAMP2_HPRR232316	GTVSTNEFLCDKDKTSTVAPTIHTTVPSPTTTPTPKEKPEAGTYSVNNGNDTCLLATMGLQLNITQDKVASVININPNTTHSTGSCRSHTALLRLNSSTIKYLDFVFAVKNENRFYLKEVNISMYLVNGSVFSIANNNLSY	LAMP2	P13473	MAD	-1	-0.8	FALSE
HTP0087B	Plasma	SciLifeLab peptide array	LAMP2_HPRR2810012	ASTYSIDSVSFSYNTGDNTTFPDAEDKGILTVDELLAIRIPLNDLFRCNSLSTLEKNDVVQHYWDVLV	LAMP2	P13473	MAD	6	6.1	FALSE
HTP0087B	Plasma	SciLifeLab peptide array	LAMP2_HPRR2810014	LGSSYMCNKEQTVSVSGAFQINTFDLRVQPFNVTQGKYSTAQDCSADDDNF	LAMP2	P13473	MAD	-1	-1	FALSE
HTP0087B	Plasma	SciLifeLab peptide array	LBR_HPRR3410125	MPSRKFADGEVVRGRWPGSSLYYEVEILSHDSTSQLYTVKYKDGTELELKENDIKPLTSFRQRKGGSTSSS	LBR	Q14739	MAD	0	1	FALSE
HTP0087B	Plasma	SciLifeLab peptide array	LBR_HPRR3410127	EARREVEVKLTPLILKPFGNSISRYNGEPEHIERNDAPHKNTQEKFNLSQESSYIATQYSLRPRREEVKLKEIDSKEEKYVAKELAVRTF	LBR	Q14739	MAD	18	23.1	FALSE
HTP0087B	Plasma	SciLifeLab peptide array	LRP4_HPRR1770061	IQRVDKYSGRNKETVLANVEGLMDIIVVSPQRQTGTNACGVNNGGCTHLCFARASDFVCACPDEPDSQPCSLVPGLVPPAPRATGMSEKSPVLPNTPPTTLYSSTTRTRTSLEEVEGRCSERDARLGLCARSNDAVPAAP	LRP4	O75096	MAD	0	15.1	FALSE
HTP0087B	Plasma	SciLifeLab peptide array	LRP4_HPRR1770062	PGMGNLTYSNPSYRTSTQEVKIEAIPKPAMYNQLCYKKEGGPDHNYTKEKIKIVEGICLLSGDDAEWDDLKQLRSSRGGLLRDHVCMKTDTVSIQASSGSLDDTETEQLLQEEQSECSSVH	LRP4	O75096	MAD	-2	3.3	FALSE
HTP0087B	Plasma	SciLifeLab peptide array	MARS_HPRR430074	FVLQDTVEQLRCEHCARFLADRFVEGVCPFCGYEEARGDQCDKCGKLINAVELKKPQCKVCRSCPVVQSSQHLFLDLPKLEKRLEEWLGRTLPGSDWTPNAQFITRSWLRDGLKPRCITRDLKWGTPVPLEGFEDKVFYVWFD	MARS	P56192	MAD	3	4	FALSE
HTP0087B	Plasma	SciLifeLab peptide array	MBP_HPRR2850726	ASTNSETNRGESEKKRNLGELSRTTSEDNEVFGEADANQNNGTSSQDTAVTDSKRTADPKNAWQDAHPADPGSRPHLIRLFSRDAP	MBP	P02686	MAD	4	33.3	FALSE
HTP0087B	Plasma	SciLifeLab peptide array	MBP_HPRR2850727	DENPVVHFFKNIVTPRTPPPSQGKGRGLSLSRFSWGAEGQRPGFGYGGRASDYKSAHKGFKGVDAQGTLSKIFKLGGRDSRSGSPM	MBP	P02686	MAD	-1	0	FALSE
HTP0087B	Plasma	SciLifeLab peptide array	MORC3_HPRR2280025	NNPDPQFRNCEVPEEPEDEDLVHPTYEKTYKKTNKEKFRIRQPEMIPRINAELLFRPTALSTPSFSSPKESVPRRHLSEGTNSYATRLLNNHQVPPQSEPESNSLKRR	MORC3	Q14149	MAD	1	4	FALSE
HTP0087B	Plasma	SciLifeLab peptide array	MORC3_HPRR2890077	GKKGTRIIIWNLRSYKNATEFDFEKDKYDIRIPEDLDEITGKKGYKKQERMDQIAPESDYSLRAYCSILYLKPRMQIILR	MORC3	Q14149	MAD	0	2	FALSE
HTP0087B	Plasma	SciLifeLab peptide array	MPO_HPRR280052	SRDHGLPGYNAWRRFCGLPQPETVGQLGTVLRNLKLARKLMEQYGTPNNIDIWMGGVSEPLKRKGRVGPLLACIIGTQFRKLRDGDRFWWENEGVFSMQQRQALAQISLPRIICDNTGITTVSKNNIFMSNSYPRDFVNC	MPO	P05164	MAD	0	1	FALSE
HTP0087B	Plasma	SciLifeLab peptide array	MPO_HPRR4160030	GAAPAVLGEVDTSLVLSSMEEAKQLVDKAYKERRESIKQRLR	MPO	P05164	MAD	1	5.2	FALSE
HTP0087B	Plasma	SciLifeLab peptide array	MUSK_HPRR2750111	YYGMAHEEVIYYVRDGNILSCPENCPVELYNLMRLCWSKLPADRPSFTSIHRILERMCERAEGTVSV	MUSK	O15146	MAD	2	2	FALSE
HTP0087B	Plasma	SciLifeLab peptide array	MUSK_HPRR2750113	PKAPVITTPLETVDALVEEVATFMCAVESYPQPEISWTRNKILIKLFDTRYSIRENGQLLTILSVEDSDDGIYCCTANNGVGGAVESCGALQVKMKPKITR	MUSK	O15146	MAD	0	1	FALSE
HTP0087B	Plasma	SciLifeLab peptide array	MUSK_HPRR290005	RGEVCNAVLAKDALVFLNTSYADPEEAQELLVHTAWNELKVVSPVCRPAAEALLCNHIFQECSPGVVPTPIPICREYCLAVKELFCAKEWLVMEEKTHRGLYRSEMHLLSVPECSKLPSMHWDPTACARLPHLAFPPMTSSK	MUSK	O15146	MAD	-1	-1	FALSE
HTP0087B	Plasma	SciLifeLab peptide array	MUSK_HPRR4160302	RESAAVTLTTLPSELLLDRLHPNPMYQRMPLLLNPKLLSLEYPRNNIEYVRDIGEGAFGRVFQARAPGLLP	MUSK	O15146	MAD	2	2	FALSE
HTP0087B	Plasma	SciLifeLab peptide array	MUSK_HPRR4160303	RIHNVQKEDAGQYRCVAKNSLGTAYSKVVKLEVEVFARILRAPESHNVTFGSFVTLHCTATGIPVPTITWIENGNA	MUSK	O15146	MAD	1	3.1	FALSE
HTP0087B	Plasma	SciLifeLab peptide array	MYH10_HPRR3460173	RQLDDATEANEGLSREVSTLKNRLRRGGPISFSSSRSGRRQLHLEGASLELSDDDTESKTSDVNETQPPQ	MYH10	P35580	MAD	-2	6.1	FALSE
HTP0087B	Plasma	SciLifeLab peptide array	MYH10_HPRR3890677	VQELHAKVSEGDRLRVELAEKASKLQNELDNVSTLLEEAEKKGIKFAKDA	MYH10	P35580	MAD	14	63.6	FALSE
HTP0087B	Plasma	SciLifeLab peptide array	MYH11_HPRR1720012	VTVLKKALDEETRSHEAQVQEMRQKHAQAVEELTEQLEQFKRAKANLDKNKQTLEKENADLAGELRVLGQAKQEVEHKKKKLEAQVQELQSKCSDGE	MYH11	P35749	MAD	-1	3	FALSE
HTP0087B	Plasma	SciLifeLab peptide array	MYH11_HPRR1720013	LQEETRQKLNVSTKLRQLEEERNSLQDQLDEEMEAKQNLERHISTLNIQLSDSKKKLQDFASTVEALEEGKKRFQKEIENLTQQYEEK	MYH11	P35749	MAD	3	12	FALSE
HTP0087B	Plasma	SciLifeLab peptide array	MYH13_HPRR4080014	DNKEMYVKGMIQTRENDKVIVKTLDDRMLTLNNDQVFPMN	MYH13	Q9UKX3	MAD	0	48.5	FALSE
HTP0087B	Plasma	SciLifeLab peptide array	MYH14_HPRR3830109	GAGEQLKADLLLEPCSHYRFLTNGPSSSPGQERELFQETLESLRVLGFSHEE	MYH14	Q7Z406	MAD	2	4.1	FALSE
HTP0087B	Plasma	SciLifeLab peptide array	MYH14_HPRR4290008	FTTRTVRQVFRLEEGVASDEEAEEAQPGSGPSPEPEGSPP	MYH14	Q7Z406	MAD	-1	0	FALSE
HTP0087B	Plasma	SciLifeLab peptide array	MYH15_HPRR2960342	KMERERADLTQDLADLNERLEEVGGSSLAQLEITKKQETKFQKLHRDMEEATLHFETTSASLKKRH	MYH15	Q9Y2K3	MAD	-1	5	FALSE
HTP0087B	Plasma	SciLifeLab peptide array	MYH15_HPRR2960343	LGEAAAFLRRSEAELLLLQATALDGKKKCWIPDGENAYIEAEVKGSEDDGTVIVETADGESLSIKEDKIQQMNPPEFE	MYH15	Q9Y2K3	MAD	-1	1.2	FALSE
HTP0087B	Plasma	SciLifeLab peptide array	MYH3_HPRR2500234	IEAQNQPFDAKTYCFVVDSKEEYAKGKIKSSQDGKVTVETEDNRTLVVKPEDVYAMNPPKFDRIEDMAML	MYH3	P11055	MAD	0	6.2	FALSE
HTP0087B	Plasma	SciLifeLab peptide array	MYH6*_HPRR141341	QVEEDKVNSLSKSKVKLEQQVDDLEGSLEQEKKVRMDLERAKRKLEGDLKLTQESIMDLENDKLQLEEKLKKKEFDINQQNSKIEDEQVLALQLQKKLKENQARIEELEEELEAERTARAKVEKLRSDLSRELEEISERLEEA	MYH6*	P13533;P12883;P13535;Q9Y623;P12882;Q9UKX2	MAD	9	10.3	FALSE
HTP0087B	Plasma	SciLifeLab peptide array	MYH6*_HPRR141342	ALRKKHADSVAELGEQIDNLQRVKQKLEKEKSEFKLELDDVTSNMEQIIKAKANLEKMCRTLEDQMNEHRSKAEETQRSVNDLTSQRAKLQTENGELSRQLDEKEALISQLTRGKLTYTQQLEDLKRQLEEEVKAKNALAHALQS	MYH6*	P13533;P12883	MAD	0	9.1	FALSE
HTP0087B	Plasma	SciLifeLab peptide array	MYH6*_HPRR4370083	LDKKQRNFDKILAEWKQKCEETHAELEA	MYH6*	P13533;P12883;Q9UKX3;P13535;Q9Y623;P12882;Q9UKX2;P11055	MAD	17	2	TRUE
HTP0087B	Plasma	SciLifeLab peptide array	MYH7B_HPRR3300035	KVHTIPWDGKKRVWVPDEQDAYVEAEVKSEATGGRVTVETKDQKVLMVREAELQPMNPPRFDLLEDMAMM	MYH7B	A7E2Y1	MAD	-1	18.3	FALSE
HTP0087B	Plasma	SciLifeLab peptide array	MYH7B_HPRR3300036	DMSGNKRGSRASCPHRGAECLLPWAALNLQGFQLLLLHPSATAMMDVSELGESARYLRQGYQEMTK	MYH7B	A7E2Y1	MAD	1	1	FALSE
HTP0087B	Plasma	SciLifeLab peptide array	MYH9_HPRR350143	REQEVNILKKTLEEEAKTHEAQIQEMRQKHSQAVEELAEQLEQTKRVKANLEKAKQTLENERGELANEVKVLLQGKGDSEHKRKKVEAQLQELQVKFNEGERVRTELADKVTKLQVELDNVTGLLSQSDSKSSKLTKDF	MYH9	P35579	MAD	28	2.1	TRUE
HTP0087B	Plasma	SciLifeLab peptide array	NARS_HPRR3120288	RLEDLVCDVVDRILKSPAGSIVHELNPNFQPPKRPFKRMNYSDAIVWLKEHDVKKEDGTFYEFGEDIPEAPERLMTDTINEPILLCRFPVEIK	NARS	O43776	MAD	4	3.1	TRUE
HTP0087B	Plasma	SciLifeLab peptide array	NARS_HPRR3120291	GALEGYRGQRVKVFGWVHRLRRQGKNLMFLVLRDGTGYLQCVLADELCQCYNGVLLSTESSVAVYGMLNLTPKGKQAPGGHELSCDFWELIG	NARS	O43776	MAD	3	3	FALSE
HTP0087B	Plasma	SciLifeLab peptide array	NARS2_HPRR370132	LAEFYMIEAEISFVDSLQDLMQVIEELFKATTMMVLSKCPEDVELCHKFIAPGQKDRLEHMLKNNFLIISYTEAVEILKQASQNFTFTPEWGADLRTEHEKYLVKHCGNIPVFVINYPLTLKPFYMRDNEDGPQHTVAAVDLLVPGVG	NARS2	Q96I59	MAD	-2	-1	FALSE
HTP0087B	Plasma	SciLifeLab peptide array	NCOA2_HPRR3760125	SPRMAHTQSPMMQQSQANPAYQAPSDINGWAQGNMGGNSMFSQQSPPHFGQQANTSMYSNNMNINVSMATNTGGMSSMNQMTGQISMTSVT	NCOA2	Q15596	MAD	0	1.1	FALSE
HTP0087B	Plasma	SciLifeLab peptide array	NCOA2_HPRR3760127	PKLERLDSKTDPASNTKLIAMKTEKEEMSFEPGDQPGSELDNLEEILDDLQNSQLPQLFPDTRPGAPAGSV	NCOA2	Q15596	MAD	-2	38.4	FALSE
HTP0087B	Plasma	SciLifeLab peptide array	NKX6-1_HPRR3060095	PLGTHNPGGLKPPATGGLSSLGSPPQQLSAATPHGINDILSRPSM	NKX6-1	P78426	MAD	0	2	FALSE
HTP0087B	Plasma	SciLifeLab peptide array	NLRP5_HPRR3280206	LLPESFLIVTVRDVGTEKLKSEVVSPRYLLVRGISGEQRIHLLLERGIGEHQKTQGLRAIMNNRELLDQCQVPAVGSLICVALQLQDVVGESVAPFNQTLTGLHAAFVFHQLTPR	NLRP5	P59047	MAD	0	0	FALSE
HTP0087B	Plasma	SciLifeLab peptide array	NUP210_HPRR2110161	DLIHDIQIVSTTRELYLEDSPLELKIQALDSEGNTFSTLAGLVFEWTIVKDSEADRFSDSHNALRILTFLESTYIPPSYISEMEKAAKQGDTILVSGMKTGSSKLKARIQEAVYKNVRPAEVRLLILENILLNPAYDVYLMVGTSIHYK	NUP210	Q8TEM1	MAD	1	2.1	FALSE
HTP0087B	Plasma	SciLifeLab peptide array	NUP210_HPRR2110162	TFTVHFHDNSGDVFHAHSSVLNFATNRDDFVQIGKGPTNNTCVVRTVSVGLTLLRVWDAEHPGLSDFMPLPVLQAISPELSGAMVVGDVLCLATVLTSLEGLSGTWSSSANSILHIDPKTGVAV	NUP210	Q8TEM1	MAD	-1	-1	FALSE
HTP0087B	Plasma	SciLifeLab peptide array	NUP210_HPRR3890586	HLHPIQTSFQEATASKVIVAVGDRSSNLRGECTPTQREVIQALHPETLISCQSQFKPAVFDFPSQDVFTVEPQFDTALGQYFCSITMHRLTDKQRKHL	NUP210	Q8TEM1	MAD	1	5.1	FALSE
HTP0087B	Plasma	SciLifeLab peptide array	NUP62_HPRR1430027	GGFTFGTAKTATTTPATGFSFSTSGTGGFNFGAPFQPATSTPSTGLFSLATQTPATQTTGFTFGTATLASGGTGFSLGIGASKLNLSNTAATPAMANPSGFGLGSSNLTNAISSTVTSSQGTAPTGFVFGPST	NUP62	P37198	MAD	1	2	FALSE
HTP0087B	Plasma	SciLifeLab peptide array	OGDH_HPRR2440198	LRTCAAKLRPLTASQTVKTFSQNRPAAARTFQQIRCYSAPVAAEPFLSGTSSNYVEEMYCAWLENPKSV	OGDH	Q02218	MAD	-1	0.1	FALSE
HTP0087B	Plasma	SciLifeLab peptide array	OGDH_HPRR2440199	FRNTNAGAPPGTAYQSPLPLSRGSLAAVAHAQSLVEAQPNVDKLVEDHLAVQSLIRAYQIRGHHVAQ	OGDH	Q02218	MAD	-1	1	FALSE
HTP0087B	Plasma	SciLifeLab peptide array	PAGE2B*_HPRR3340273	QGIAPSGEIENEGAPAVQGPDMEAFQQELALLKIEDEPGDGPDVREGIMPTFDLTKVLEAGDA	PAGE2B*	Q5JRK9;Q7Z2X7;Q96GU1	MAD	-1	6.3	FALSE
HTP0087B	Plasma	SciLifeLab peptide array	PAGE2B*_HPRR3340274	RSQSSERGNDQESSQPVGSVIVQEPTEEKRQEEEPPTDN	PAGE2B*	Q5JRK9;Q7Z2X7;Q96GU1	MAD	-1	14.1	FALSE
HTP0087B	Plasma	SciLifeLab peptide array	PAGE5_HPRR3920178	PWAGNRGWAGTREEVRDMSEHVTRSQS	PAGE5	Q96GU1	MAD	0	12.3	FALSE
HTP0087B	Plasma	SciLifeLab peptide array	PDHA1*_HPRR3340143	NDATFEIKKCDLYLLEEGPPVTTVLTR	PDHA1*	P08559;P29803	MAD	0	2	FALSE
HTP0087B	Plasma	SciLifeLab peptide array	PDHA1*_HPRR3340144	ILAELTGRRGGCAKGKGGSMHMYTKNFYGGNGIVG	PDHA1*	P08559;P29803	MAD	0	1	FALSE
HTP0087B	Plasma	SciLifeLab peptide array	PDHA1*_HPRR3340146	YCRSGKGPILMELQTYRYHGHSMSDPGVS	PDHA1*	P08559;P29803	MAD	-1	0	FALSE
HTP0087B	Plasma	SciLifeLab peptide array	PDHX_HPRR3050163	PAARNILEKHSLDASQGTATGPRGIFTKEDALKLVQLKQTGKITESRPTPAPTATPTAPSPLQATAGPSYPRPVIPPVSTPGQPNAVGTFTEI	PDHX	O00330	MAD	-1	0	FALSE
HTP0087B	Plasma	SciLifeLab peptide array	PDHX_HPRR3050164	DASDDGILAKIVVEEGSKNIRLGSLIGLIVEEGEDWKHVEIPKDVGPPPPVSKPSEPRPSPEPQISIPVKKEHIPGTLRFRLS	PDHX	O00330	MAD	0	22.4	FALSE
HTP0087B	Plasma	SciLifeLab peptide array	PDX1_HPRR3930003	DISPYEVPPLADDPAVAHLHHHLPAQLALPHPPAGPFPEGAEPGVLEEPNRVQLPFPWMKSTKA	PDX1	P52945	MAD	12	30.2	FALSE
HTP0087B	Plasma	SciLifeLab peptide array	PLP1_HPRR4180637	IYFNTWTTCQSIAFPSKTSASIGSLCADARMYGVLPWNAFPGK	PLP1	P60201	MAD	-1	0	FALSE
HTP0087B	Plasma	SciLifeLab peptide array	PPY_HPRR2500214	EPVYPGDNATPEQMAQYAADLRRYINMLTRPRYGKRHKEDTLAFSEWGSPHAAVPRELSPLDL	PPY	P01298	MAD	-1	2	FALSE
HTP0087B	Plasma	SciLifeLab peptide array	PROC_HPRR330193	DQCLVLPLEHPCASLCCGHGTCIDGIGSFSCDCRSGWEGRFCQREVSFLNCSLDNGGCTHYCLEEVGWRRCSCAPGYKLGDDLLQCHPAVKFPCGRPWKRMEKKRSHLKRDTEDQEDQVDPRLIDGKMTRRGDSPWQVVLLD	PROC	P04070	MAD	1	2	FALSE
HTP0087B	Plasma	SciLifeLab peptide array	PROC_HPRR330194	AHCMDESKKLLVRLGEYDLRRWEKWELDLDIKEVFVHPNYSKSTTDNDIALLHLAQPATLSQTIVPICLPDSGLAERELNQAGQETLVTGWGYHSSREKEAKRNRTFVLNFIKIPVVPHNECSEVMSNMVSENMLCAGI	PROC	P04070	MAD	5	4	TRUE
HTP0087B	Plasma	SciLifeLab peptide array	PRPH_HPRR3070455	FSSTSYRRTFGPPPSLSPGAFSYSSSSRFSSSRLLGSASPSSSVRLGSFRSPRAGAGALLRLPSERLDFSMAEALNQEFLATRSNEKQEL	PRPH	P41219	MAD	-1	0	FALSE
HTP0087B	Plasma	SciLifeLab peptide array	PRPH_HPRR3890753	EESRISVPVHSFASLNIKTTVPEVEPPQDSHSRKTVLIKTI	PRPH	P41219	MAD	3	179.2	FALSE
HTP0087B	Plasma	SciLifeLab peptide array	PRTN3_HPRR400125	PTQQHFSVAQVFLNNYDAENKLNDILLIQLSSPANLSASVATVQLPQQDQPVPHGTQCLAMGWGRVGAHDPPAQVLQELNVTVVTFFCRPHNICTFVPRRKAGICFGDSGGPLICDGI	PRTN3	P24158	MAD	1	3	FALSE
HTP0087B	Plasma	SciLifeLab peptide array	PSMA3_HPRR4320279	TGYDLSASTFSPDGRVFQVEYAMKAVENSSTAIGIRCKDGVVFGVEKLVLSKLYEEGSNKRLFNVDRHVGMAVAGLLADAR	PSMA3	P25788	MAD	0	1	FALSE
HTP0087B	Plasma	SciLifeLab peptide array	PTGER3_HPRR1960004	MKETRGYGGDAPFCTRLNHSYTGMWAPERSAEARGNLTRPPGSGEDCGSVS	PTGER3	P43115	MAD	-1	2	FALSE
HTP0087B	Plasma	SciLifeLab peptide array	PTGER3_HPRR4160226	RKILLRKFCQIRYHTNNYASSSTSLPCQCSSTLMWSDHLER	PTGER3	P43115	MAD	1	2	FALSE
HTP0087B	Plasma	SciLifeLab peptide array	PTGS1_HPRR330080	MPDSFKVGSQEYSYEQFLFNTSMLVDYGVEALVDAFSRQIAGRIGGGRNMDHHILHVAVDVIRESREMRLQPFNEYRKRFGMKPYTSFQELVGEKEMAAELEELYGDIDALEFYPGLLLEKCHPNSIFGESMIEIGAPFSLKGLLGN	PTGS1	P23219	MAD	6	6	FALSE
HTP0087B	Plasma	SciLifeLab peptide array	PTPRN_HPRR1350005	VSSEPPKAARPPVTPVLLEKKSPLGQSQPTVAGQPSARPAAEEYGYIVTDQNVVGPALTFRIRHNEQNLSLADVTQQAGLVKSELEAQTGLQILQTGVGQREEAAAVLPQTAHSTSPM	PTPRN	Q16849	MAD	-1	1.1	FALSE
HTP0087B	Plasma	SciLifeLab peptide array	PTPRN_HPRR4160144	QVTSPVLQRLQGVLRQLMSQGLSWHDDLTQYVISQEMERIPRLRPPEPRPRDRSGLAPKRPGPAGELLLQDIPTGSAPAAQHRL	PTPRN	Q16849	MAD	11	2	TRUE
HTP0087B	Plasma	SciLifeLab peptide array	PTPRN2_HPRR1350080	QDDDDRLYQEVHRLSATLGGLLQDHGSRLLPGALPFARPLDMERKKSEHPESSLSSEEETAGVENVKSQTYSKDLLGQQPHSEPGAAAFGELQNQMPGPSKEEQSLPAGAQ	PTPRN2	Q92932	MAD	-1	3.1	FALSE
HTP0087B	Plasma	SciLifeLab peptide array	PTPRN2_HPRR1350081	RFSESILTYVAHTSALTYPPGSRTQLREDLLPRTLGQLQPDELSPKVDSGVDRHHLMAALSAYAAQRPPAPPGEGSLEPQYLLRAPSRMPRPLLAPAAPQKWPSPLGDSEDPSST	PTPRN2	Q92932	MAD	2	11.1	FALSE
HTP0087B	Plasma	SciLifeLab peptide array	RAB3D*_HPRR4320449	AVQDWATQIKTYSWDNAQVILVGNKCD	RAB3D*	O95716;P20336;P20337;Q96E17	MAD	0	1	FALSE
HTP0087B	Plasma	SciLifeLab peptide array	RAB3D_HPRR2260029	EASAKENINVKQVFERLVDVICEKMNESLEPSSSSGSNGKGPAVGDAPAPQPSSCSC	RAB3D	O95716	MAD	-1	33	FALSE
HTP0087B	Plasma	SciLifeLab peptide array	RAPSN_HPRR3050586	TKVLEKSSDLMGRFRVLGCLVTAHSEMGRYKEMLKFAVVQIDTARELEDADFLLESYLNLARSNEKLCEFHKTISYCKTC	RAPSN	Q13702	MAD	4	2	TRUE
HTP0087B	Plasma	SciLifeLab peptide array	RAPSN_HPRR3050587	SLSMGNAFLGLSVFQKALESFEKALRYAHNNDDAMLECRVCCSLGSFYAQVKDYEKALFFPCKAAELVNNYGKGWSLKYRAMS	RAPSN	Q13702	MAD	0	0	FALSE
HTP0087B	Plasma	SciLifeLab peptide array	RAPSN_HPRR3050588	MECCEESMKIALQHGDRPLQALCLLCFADIHRSRGDLETAFPRYDSAMSIMTEIGNRLGQVQALLGVAKCWVARKALDKALDAIE	RAPSN	Q13702	MAD	0	1	FALSE
HTP0087B	Plasma	SciLifeLab peptide array	RARS_HPRR620009	VVLGEDKKKFKTRSGETVRLMDLLGEGLKRSMDKLKEKERDKVLTAEELNAAQTSVAYGCIKYADLSHNRLNDYIFSFDKMLDDRGNTAAYLLYAFTRIRSIARLANIDEEMLQKAARETKILLDHEKEWKLGRCILRFPEI	RARS	P54136	MAD	0	2	FALSE
HTP0087B	Plasma	SciLifeLab peptide array	REG1B*_HPRR3320001	TDDFNVWIGLHDPKKNRRWHWSSGSLVSYKSWG	REG1B*	P48304;P05451	MAD	0	3.1	FALSE
HTP0087B	Plasma	SciLifeLab peptide array	REG1B*_HPRR3320002	PEGTNAYRSYCYYFNEDRETWVDADLYCQNMNSGNLVSV	REG1B*	P48304;P05451	MAD	0	13.8	FALSE
HTP0087B	Plasma	SciLifeLab peptide array	RHD*_HPRR3980079	LNLKIWKAPHVAKYFDDQVFWKFPHLAVGF	RHD*	Q02161;P18577	MAD	1	2	FALSE
HTP0087B	Plasma	SciLifeLab peptide array	RHD*_HPRR4080111	AILLDGFLSQFPSGKVVITLFSIRL	RHD*	Q02161;P18577	MAD	1	2	FALSE
HTP0087B	Plasma	SciLifeLab peptide array	RHD_HPRR2870121	VGFSKSIQEKQGLFKNKTTSSHCCLHLYVRNAHDSKVSNVRAGTGVRENGVESFLCHSLRRISPFIMHC	RHD	Q02161	MAD	0	1.1	FALSE
HTP0087B	Plasma	SciLifeLab peptide array	RPL6_HPRR3720353	VPRKLLSHGKKPFSQHVRKLRASITPGTILIILTGRHRGKRVVFLKQLASGLLL	RPL6	Q02878	MAD	-2	-1	FALSE
HTP0087B	Plasma	SciLifeLab peptide array	RPL6_HPRR580003	LRASITPGTILIILTGRHRGKRVVFLKQLASGLLLVTGPLVLNRVPLRRTHQKFVIATSTKIDISNVKIPKHLTDAYFKKKKLRKPRHQEGEIFDTEKEKYEITEQRKIDQKAVDSQILPKIKAIPQLQGYLRSVFALTNGIYPH	RPL6	Q02878	MAD	-1	7	FALSE
HTP0087B	Plasma	SciLifeLab peptide array	RPLP0_HPRR580058	VVLMGKNTMMRKAIRGHLENNPALEKLLPHIRGNVGFVFTKEDLTEIRDMLLANKVPAAARAGAIAPCEVTVPAQNTGLGPEKTSFFQALGIT	RPLP0	P05388	MAD	1	2.1	FALSE
HTP0087B	Plasma	SciLifeLab peptide array	RPLP1_HPRR580030	MASVSELACIYSALILHDDEVTVTEDKINALIKAAGVNVEPFWPGLFAKALANVNIGSLICNVGAGGPAPAAGAAPAGGPAPSTAAAPAEEKKVEAKKEESEESDDDMG	RPLP1	P05386	MAD	-1	1	FALSE
HTP0087B	Plasma	SciLifeLab peptide array	RPLP2_HPRR3830386	MRYVASYLLAALGGNSSPSAKDIKKILDSVGIEADDDRLNKVIS	RPLP2	P05387	MAD	-1	0	FALSE
HTP0087B	Plasma	SciLifeLab peptide array	RPLP2_HPRR4290615	SELNGKNIEDVIAQGIGKLASVPAGGAVAVSAAPGSAAP	RPLP2	P05387	MAD	0	5.3	FALSE
HTP0087B	Plasma	SciLifeLab peptide array	RYR1_HPRR3420763	REFLHNNLHLQGKVEGSPSLRWQMALYRGVPGREEDADDPEKIVRRVQEVSAVLYYLDQTEHPYKSKK	RYR1	P21817	MAD	-1	0	FALSE
HTP0087B	Plasma	SciLifeLab peptide array	SAE1_HPRR3280030	NSIKFFTGDVFGYHGYTFANLGEHEFVEEKTKVAKVSQGVEDGPDTKRAKLDSSETTMVKKKVVFCPVKEALE	SAE1	Q9UBE0	MAD	0	3	FALSE
HTP0087B	Plasma	SciLifeLab peptide array	SAE1_HPRR3280031	KGLTMLDHEQVTPEDPGAQFLIRTGSVGRNRAEASLERAQNLNPMVDVKVDTEDIEKKPESFFTQFDAVCLTCCSRD	SAE1	Q9UBE0	MAD	4	23.4	FALSE
HTP0087B	Plasma	SciLifeLab peptide array	SARS_HPRR1390005	NVLSFDDLTADALANLKVSQIKKVRLLIDEAILKCDAERIKLEAERFENLREIGNLLHPSVPISNDEDVDNKVERIWGDCTVRKKYSHVDLVVMVDGFEGEKGAVVAGSRGYFLKGVLVFLEQALIQYAL	SARS	P49591	MAD	8	3	TRUE
HTP0087B	Plasma	SciLifeLab peptide array	SARS_HPRR4160317	GSRGYIPIYTPFFMRKEVMQEVAQLSQFDEELYKVIGKGSEKSDDNSYDEKYLIATSEQPIAALHRDEWLRPEDLPIKYAGLSTCFRQ	SARS	P49591	MAD	0	5.1	FALSE
HTP0087B	Plasma	SciLifeLab peptide array	SIAH2_HPRR1450566	QPQHTPSPQHHELTSLFECPVCFDYVLPPILQCQAGHLVCNQCRQKLSCCP	SIAH2	O43255	MAD	2	2	FALSE
HTP0087B	Plasma	SciLifeLab peptide array	SIAH2_HPRR4040718	TGPSANKPCSKQPPPQPQHTPSPA	SIAH2	O43255	MAD	112	158.8	FALSE
HTP0087B	Plasma	SciLifeLab peptide array	SLC14A1_HPRR4030315	MNGRSLIGGAGDARHGPVWKDPFGTKAGDAARRGIARLSLALADGSQEQE	SLC14A1	Q13336	MAD	-1	1	FALSE
HTP0087B	Plasma	SciLifeLab peptide array	SLC14A1_HPRR4030316	GHYNPFFPAKLVIPITTAPNISWSDLSALELLKSIPVGVGQI	SLC14A1	Q13336	MAD	0	1	FALSE
HTP0087B	Plasma	SciLifeLab peptide array	SLC26A4_HPRR2440187	FGLLTVVLRVQFPSWNGLGSIPSTDIYKSTKNYKNIEEPQGVKILRFSSPIFYGNVDGFKKCIKSTVGFDAIRVYNKRLKALRK	SLC26A4	O43511	MAD	-1	-1	FALSE
HTP0087B	Plasma	SciLifeLab peptide array	SLC26A4_HPRR2440190	IEKLEQCGFFDDNIRKDTFFLTVHDAILYLQNQVKSQEGQGSILETITLIQDCKDTLELIETELTEEELDVQDE	SLC26A4	O43511	MAD	-2	-1	FALSE
HTP0087B	Plasma	SciLifeLab peptide array	SLC26A4_HPRR3870179	QLPEYSCSYMVSRPVYSELAFQQQHERRLQERKTLRESLAKCCSCSRKRAFGVLKTLVPILE	SLC26A4	O43511	MAD	1	2	FALSE
HTP0087B	Plasma	SciLifeLab peptide array	SLC30A8_HPRR2180114	MEFLERTYLVNDKAAKMYAFTLESVELQQKPVNKDQCPRERPEELESGGMYHCHSGSKPTEKGANEYAYAKWK	SLC30A8	Q8IWU4	MAD	2	19.2	FALSE
HTP0087B	Plasma	SciLifeLab peptide array	SLC30A8_HPRR3970264	LHQRCLGHNHKEVQANASVRAA	SLC30A8	Q8IWU4	MAD	-1	1	FALSE
HTP0087B	Plasma	SciLifeLab peptide array	SLC30A8_HPRR3970265	LSAHVATAASRDSQVVRREIAKALSKSFTMHSLTIQMESPVDQDPDCLFCEDPCD	SLC30A8	Q8IWU4	MAD	2	6	FALSE
HTP0087B	Plasma	SciLifeLab peptide array	SNRPB*_HPRR400172	TFKAFDKHMNLILCDCDEFRKIKPKNAKQPEREEKRVLGLVLLRGENLVSMTVEGPPPKDTGIARVPLAGAAGGPGVGRAAGRGVPAGVPIPQ	SNRPB*	P14678;P63162	MAD	0	2	FALSE
HTP0087B	Plasma	SciLifeLab peptide array	SNRPB*_HPRR4320676	QAPAGLAGPVRGVGGPSQQVMTPQGRGT	SNRPB*	P14678;P63162	MAD	-1	1.1	FALSE
HTP0087B	Plasma	SciLifeLab peptide array	SNRPD1_HPRR3120151	SMNTHLKAVKMTLKNREPVQLETLSIRGNNIRYFILPDSLPLDTLLVDVEPKVKSKKREAVAGRGR	SNRPD1	P62314	MAD	0	1.1	FALSE
HTP0087B	Plasma	SciLifeLab peptide array	SNRPD1_HPRR4000134	MKLVRFLMKLSHETVTIELKNGTQVHGTITGVDVS	SNRPD1	P62314	MAD	8	10.1	FALSE
HTP0087B	Plasma	SciLifeLab peptide array	SNRPD2_HPRR3250190	GKGKKKSKPVNKDRYISKMFLRGDSVIVVLRNPLIAGK	SNRPD2	P62316	MAD	-1	0	FALSE
HTP0087B	Plasma	SciLifeLab peptide array	SNRPD2_HPRR3250191	REEEEFNTGPLSVLTQSVKNNTQVLINCRNNKKLLGRVKAFDRHCNMVLENVKEMWTE	SNRPD2	P62316	MAD	-1	1	FALSE
HTP0087B	Plasma	SciLifeLab peptide array	SNRPD3_HPRR220243	KVLHEAEGHIVTCETNTGEVYRGKLIEAEDNMNCQMSNITVTYRDGRVAQLEQVYIRGSKIRFLILPDMLKNAPMLKSMKNKNQGSGAGRGKAAILKAQVAARGRGRGMGRGNI	SNRPD3	P62318	MAD	1	1.1	FALSE
HTP0087B	Plasma	SciLifeLab peptide array	SNRPF_HPRR1720018	LNPKPFLNGLTGKPVMVKLKWGMEYKGYLVSVDGYMNMQLANTEEYIDGALSGHLGEVLIRCNNVLYIRGVEEEEEDG	SNRPF	P62306	MAD	1	9.1	FALSE
HTP0087B	Plasma	SciLifeLab peptide array	SNRPG_HPRR3400115	MSKAHPPELKKFMDKKLSLKLNGGRHVQGILRGFDPFMNLVIDECVEMATSGQQNNIGMVVIRGNSIIMLEALE	SNRPG	P62308	MAD	8	0.1	TRUE
HTP0087B	Plasma	SciLifeLab peptide array	SOX10_HPRR3830104	YSAAGYGLGSALAVASGHSAWISKPPGVALPTVSPPGVDAKAQVKTETA	SOX10	P56693	MAD	0	13	FALSE
HTP0087B	Plasma	SciLifeLab peptide array	SOX13_HPRR3410162	QDARQLLHSHSGALDGSPNTPFRKDLISLDSSPAKERLEDGCVHPLEEAMLSCDMDGSRHFPESRNSSHI	SOX13	Q9UN79	MAD	1	3	FALSE
HTP0087B	Plasma	SciLifeLab peptide array	SOX13_HPRR3410163	DVLYPRAAGMPLAQPLVEHYVPRSLDPNMPVIVNTCSLREEGEGTDDRHSVADGEMYRYSEDEDSEGEEKSDGELVVLT	SOX13	Q9UN79	MAD	-1	3	FALSE
HTP0087B	Plasma	SciLifeLab peptide array	SOX9_HPRR360171	SQRTHIKTEQLSPSHYSEQQQHSPQQIAYSPFNLPHYSPSYPPITRSQYDYTDHQNSSSYYSHAAGQGTGLYSTFTYMNPAQRPMYTPIADTSGVPSIPQTHSPQHWEQPVYTQLTR	SOX9	P48436	MAD	-1	1.1	FALSE
HTP0087B	Plasma	SciLifeLab peptide array	SOX9_HPRR4180522	PFMKMTDEQEKGLSGAPSPTMSEDSAGSPCPSGSGSDTENTRPQENTFPKGEPDLKKESEEDKF	SOX9	P48436	MAD	-1	8.2	FALSE
HTP0087B	Plasma	SciLifeLab peptide array	SP100_HPRR2240001	YKGFENVIHDKLPLQESEEEEREERSGLQLSLEQGTGENSFRSLTWPPSGSPSHAGTTPPENGLSEHPCETEQINAKRKDTTSDKDDSLGSQQTNEQCAQKAEPTESCEQIAVQVNNGDAGREMPCPL	SP100	P23497	MAD	-2	2.5	FALSE
HTP0087B	Plasma	SciLifeLab peptide array	SP100_HPRR2240002	QARTHHNQASDIIVISSEDSEGSTDVDEPLEVFISAPRSEPVINNDNPLESNDEKEGQEATCSRPQIVPEPMDFRKLSTFRESFKKRVIGQDHDFSESSE	SP100	P23497	MAD	-2	1	FALSE
HTP0087B	Plasma	SciLifeLab peptide array	SP140_HPRR1450089	SELEKTFGWSHLEALFSRINLMAYPDLNEIYRSFQNVCYEHSPLQMNNVNDLEDRPRLLPYGKQENSNACHEMDDIAVPQEALSSSPRCEPGFSSESCEQLALPKAGGGDAEDAPSLLPGGGVSCKLAIQIDEGESEEMPKLLP	SP140	Q13342	MAD	2	4.2	FALSE
HTP0087B	Plasma	SciLifeLab peptide array	SP140_HPRR4160718	LSLLPGEGEEGSDDCSEMCDGEERQEASSSLARRGSVSSELENHPMNEEGESEELASSLLYDNVPGAEQSA	SP140	Q13342	MAD	-1	2	FALSE
HTP0087B	Plasma	SciLifeLab peptide array	SRP14_HPRR2870077	GTVEGFEPADNKCLLRATDGKKKISTVVSSKEVNKFQMAYSNLLRANMDGLKKRDKKNKTKKTKAAAAA	SRP14	P37108	MAD	-1	0	FALSE
HTP0087B	Plasma	SciLifeLab peptide array	SRP14_HPRR3930096	MVLLESEQFLTELTRLFQKCRTSGSVYITLKKYDGRTKPIPKK	SRP14	P37108	MAD	0	1	FALSE
HTP0087B	Plasma	SciLifeLab peptide array	SRP19_HPRR2870087	DVQYRGRVRVQLKQEDGSLCLVQFPSRKSVMLYAAEMIPKLKTRTQKTGGADQSLQQGEGSK	SRP19	P09132;Q15695	MAD	2	3	FALSE
HTP0087B	Plasma	SciLifeLab peptide array	SRP19_HPRR2870088	DQDRFICIYPAYLNNKKTIAEGRRIPISKAVENPTATEIQDVCSAVGLNVFLEKNKMYSREWNR	SRP19	P09132;Q15695	MAD	0	2	FALSE
HTP0087B	Plasma	SciLifeLab peptide array	SRP54_HPRR3720460	VIIASEGVEKFKNENFEIIIVDTSGRHKQEDSLFEEMLQVANAIQPDNIVYVMDASIGQACEAQAKAFKDKVDVASVIVT	SRP54	P61011	MAD	7	4.1	TRUE
HTP0087B	Plasma	SciLifeLab peptide array	SRP54_HPRR3720461	SALRSLSNATIINEEVLNAMLKEVCTALLEADVNIKLVKQLRENVKSAIDLEEMASGLNKRKMIQHAVFKELVKLVDPGVKAWTPTKGKQNV	SRP54	P61011	MAD	0	2	FALSE
HTP0087B	Plasma	SciLifeLab peptide array	SRP68_HPRR2500803	AESEETKERLFESMLSECRDAIQVVREELKPDQKQRDYILEGEPGKVSNLQYLHSYLTYIKLSTAIKRNENMAKGLQRALLQQQPEDDSKRSPRPQDLIRLYDIILQNLVELL	SRP68	Q9UHB9	MAD	-2	-2	FALSE
HTP0087B	Plasma	SciLifeLab peptide array	SRP68_HPRR2500805	GEENKENERPSAGSKANKEFGDSLSLEILQIIKESQQQHGLRHGDFQRYRGYCSRRQRRLRKTLNFKMGNRHKFTGKKVTEELLTDNRYLLLVLMDAERAWSYAMQLKQEANTEPRKRFHLLSRLRKAVKHAEELERLCE	SRP68	Q9UHB9	MAD	-1	0	FALSE
HTP0087B	Plasma	SciLifeLab peptide array	SRP68_HPRR2500807	DAKTKLEAQAYTAYLSGMLRFEHQEWKAAIEAFNKCKTIYEKLASAFTEEQAVLYNQRVEEISPNIRYCAYNIGDQSAINELMQMRLRSGGTEGLLAEKLEALITQTRAKQAATMSEVEWRGRTVPVKIDKVRIFLLGLADNEAAIV	SRP68	Q9UHB9	MAD	1	1.1	FALSE
HTP0087B	Plasma	SciLifeLab peptide array	SRP72_HPRR2870116	QHTKAIELLQEFSDQHPENAAEIKLTMAQLKISQGNISKACLILRSIEELKHKPGMVSALVTMYSHEEDIDSAIEVFTQAIQWYQNHQPKSPA	SRP72	O76094	MAD	-2	0	FALSE
HTP0087B	Plasma	SciLifeLab peptide array	SRP72_HPRR2870118	ENALKTIESANQQTDKLKELYGQVLYRLERYDECLAVYRDLVRNSQDDYDEERKTNLSAVVAAQSNWEKVVPENLGLQEGTHELCYNTACA	SRP72	O76094	MAD	0	2.1	FALSE
HTP0087B	Plasma	SciLifeLab peptide array	SRP72_HPRR2870119	ANFKLKYGRKKEAISDLQQLWKQNPKDIHTLAQLISAYSLVDPEKAKALSKHLPSSDSMSLKVDVEALENSAGATYIRKKGGKVTGDSQPKEQG	SRP72	O76094	MAD	-1	4	FALSE
HTP0087B	Plasma	SciLifeLab peptide array	SSB_HPRR2010045	AKICHQIEYYFGDFNLPRDKFLKEQIKLDEGWVPLEIMIKFNRLNRLTTDFNVIVEALSKSKAELMEISEDKTKIRRSPSKPLPEVTDEYKNDVKNRSVYIKGFPTDATLDD	SSB	P05455	MAD	3	19.5	FALSE
HTP0087B	Plasma	SciLifeLab peptide array	SSB_HPRR2010046	VVFDSIESAKKFVETPGQKYKETDLLILFKDDYFAKKNEERKQNKVEAKLRAKQEQEAKQKL	SSB	P05455	MAD	1	4.1	FALSE
HTP0087B	Plasma	SciLifeLab peptide array	SSSCA1_HPRR3050793	NGAEVDDFSWEPPTEAETKVLQARRERQDRISRLMGDYLLRGYRMLGETCADCGTILLQDKQRKIYCVACQELDSDVDKDNPALNAQAALSQAR	SSSCA1	O60232	MAD	-1	0	FALSE
HTP0087B	Plasma	SciLifeLab peptide array	SUMO1_HPRR2920297	QDSSEIHFKVKMTTHLKKLKESYCQRQGVPMNSLRFLFEGQRIADNHTPKELGMEEEDVIEVYQEQT	SUMO1	P63165	MAD	0	1	FALSE
HTP0087B	Plasma	SciLifeLab peptide array	SUMO1_HPRR3890167	SDQEAKPSTEDLGDKKEGEYIKLKV	SUMO1	P63165	MAD	0	3	FALSE
HTP0087B	Plasma	SciLifeLab peptide array	SUMO4*_HPRR3230036	TDKPAQLEMEDEDTIDVFQQPTGGV	SUMO4*	Q6EEV6;P55854;P61956	MAD	-2	2.1	FALSE
HTP0087B	Plasma	SciLifeLab peptide array	SUMO4*_HPRR3230037	HINLKVAGQDGSVVQFKIKRHTPLSKLMKAYC	SUMO4*	Q6EEV6;P55854;P61956	MAD	-1	0	FALSE
HTP0087B	Plasma	SciLifeLab peptide array	TALDO1_HPRR3050870	FVGRILDWHVANTDKKSYEPLEDPGVKSVTKIYNYYKKFSYKTIVMGASFRNTGEIKALAGCDFLTISPKLLGEL	TALDO1	P37837	MAD	0	1	FALSE
HTP0087B	Plasma	SciLifeLab peptide array	TALDO1_HPRR3050873	MSSSPVKRQRMESALDQLKQFTTVVADTGDFHAIDEYKPQDATTNPSLILAAAQMPAYQELVEEAIAYGRKLGGS	TALDO1	P37837	MAD	-1	8.2	FALSE
HTP0087B	Plasma	SciLifeLab peptide array	TARS_HPRR3010092	MFEEKASSPSGKMGGEEKPIGAGEEKQKEGGKKKNKEGSGDGGRAELNPWPEYIYTRLEMYNIL	TARS	P26639	MAD	-1	0	FALSE
HTP0087B	Plasma	SciLifeLab peptide array	TARS_HPRR3890005	RDNKVHGERTISETIERLQQLKEFRSKQAEEEF	TARS	P26639	MAD	-1	3.2	FALSE
HTP0087B	Plasma	SciLifeLab peptide array	TDRD6_HPRR2630195	VLHVDYGRKELVSCSSLRYLLPEYFRMPVVTYPCALYGLWDGGRGWSRSQVGDLKALILGKAVNAKIEFYCSFEHVYYVSLYGEDGINLNRVFGVQSC	TDRD6	O60522	MAD	1	2	FALSE
HTP0087B	Plasma	SciLifeLab peptide array	TDRD6_HPRR4290688	INSSYKELKLLQSLTKTNLVTQYQDSVGNKNSQVFPLTTEKKEEISAETPLKTARVEATLSERKIGDSCDKDLPLKFCEFPQKTI	TDRD6	O60522	MAD	12	25.1	FALSE
HTP0087B	Plasma	SciLifeLab peptide array	TG_HPRR350042	KMCSADYADLLQTFQVFILDELTARGFCQIQVKTFGTLVSIPVCNNSSVQVGCLTRERLGVNVTWKSRLEDIPVASLPDLHDIERALVGKDLLGRFTDLIQSGSFQLHLDSKTFPAETIRFLQGDHFGTSPRTWFGCSEGFYQVLTSEASQDGLGCVKCPEGS	TG	P01266	MAD	-2	-1	FALSE
HTP0087B	Plasma	SciLifeLab peptide array	TGM2_HPRR2430028	MAEELVLERCDLELETNGRDHHTADLCREKLVVRRGQPFWLTLHFEGRNYEASVDSLTFSVVTGPAPSQEAGTK	TGM2	P21980	MAD	0	2	FALSE
HTP0087B	Plasma	SciLifeLab peptide array	TGM2_HPRR2430030	VEPVINSYLLAERDLYLENPEIKIRILGEPKQKRKLVAEVSLQNPLPVALEGCTFTVEGAGLTEEQKTVEIPDPVEAGEEVKVRMDLLP	TGM2	P21980	MAD	-1	0	FALSE
HTP0087B	Plasma	SciLifeLab peptide array	TH_HPRR2010098	EFGLCKQNGEVKAYGAGLLSSYGELLHCLSEEPEIRAFDPEAAAVQPYQDQTYQSVYFVSESFSDAKDKLRSYASRIQRPFSVKFDPYTLAIDVLDSPQAVRRSLEGVQDEL	TH	P07101	MAD	-2	0	FALSE
HTP0087B	Plasma	SciLifeLab peptide array	TH_HPRR3790012	SESFSDAKDKLRSYASRIQRPFSVKFDPYTLAIDVLDSPQAVRRSLEGVQDELDTLAHALSAIG	TH	P07101	MAD	-2	2	FALSE
HTP0087B	Plasma	SciLifeLab peptide array	TKT_HPRR2460038	HYYEGGIGEAVSSAVVGEPGITVTHLAVNRVPRSGKPAELLKMFGIDRDAIAQAVRGLITKA	TKT	P29401	MAD	1	2.1	FALSE
HTP0087B	Plasma	SciLifeLab peptide array	TKT_HPRR2460039	IAKTFKGRGITGVEDKESWHGKPLPKNMAEQIIQEIYSQIQSKKKILATPPQEDAPSVDIANIRMPSLPSYKVGDKIATRKAYGQ	TKT	P29401	MAD	-1	2	FALSE
HTP0087B	Plasma	SciLifeLab peptide array	TMEM59_HPRR1950574	HLLFPLTLVRSFWSDMMDSAQSFITSSWTFYLQADDGKIVIFQSKPEIQYAPHLEQEPTNLRESSLSKMSSDLQMRNSQAHRNFLEDGESDGFLRCLSLNSGW	TMEM59	Q9BXS4	MAD	0	1	FALSE
HTP0087B	Plasma	SciLifeLab peptide array	TNFRSF13C_HPRR221279	SWRRRQRRLRGASSAEAPDGDKDAPEPLDKVIILSPGISDATAPAWPPPGEDPGTTPPGHSVPVPATELGSTELVTTKTAGPEQQ	TNFRSF13C	Q96RJ3	MAD	0	2	FALSE
HTP0087B	Plasma	SciLifeLab peptide array	TNNC1_HPRR3460135	NADGYIDLDELKIMLQATGETITEDDIEELM	TNNC1	P63316	MAD	1	1	FALSE
HTP0087B	Plasma	SciLifeLab peptide array	TNNC1_HPRR3460136	MDDIYKAAVEQLTEEQKNEFKAAFDIFVLGAEDGCISTKELGKVM	TNNC1	P63316	MAD	-1	2.1	FALSE
HTP0087B	Plasma	SciLifeLab peptide array	TNNC2_HPRR3300245	NADGYIDPEELAEIFRASGEHVTDEEIESLM	TNNC2	P02585	MAD	0	51.1	FALSE
HTP0087B	Plasma	SciLifeLab peptide array	TNNC2_HPRR3870324	ARSYLSEEMIAEFKAAFDMFDADGGGDISVKE	TNNC2	P02585	MAD	-1	2	FALSE
HTP0087B	Plasma	SciLifeLab peptide array	TNNI2_HPRR3960019	ELEKEESRREAEKQNYLAEHCPPLHIPGSMSEVQELCKQLHAKIDAAEEEKYDMEVRVQKTSK	TNNI2	P48788	MAD	-1	6.6	FALSE
HTP0087B	Plasma	SciLifeLab peptide array	TNNI3_HPRR3140624	PIRRRSSNYRAYATEPHAKKKSKISASRKLQLKTLLLQIAKQELEREAEERRGEKGRALSTRCQPLELAGLGFAELQ	TNNI3	P19429	MAD	-1	0	FALSE
HTP0087B	Plasma	SciLifeLab peptide array	TNNT1_HPRR3920058	EEEEAPEEPEPVAEPEEERPKPSRPVVPPLIPPKIPEGE	TNNT1	P13805	MAD	-1	25.7	FALSE
HTP0087B	Plasma	SciLifeLab peptide array	TNNT2_HPRR2190018	IEEVVEEYEEEEQEEAAVEEEDWREDEDEQEEAAEEDAEAEAETEETRAEEDEEEEEAKEAEDGPMEESKPKPRSFMPNLV	TNNT2	P45379	MAD	48	98.7	FALSE
HTP0087B	Plasma	SciLifeLab peptide array	TNNT2_HPRR2190019	EEEENRRKAEDEARKKKALSNMMHFGGYIQKQAQTERKSGKRQTEREKKKKILAERRKVLAIDHLNEDQLREKAKELWQSIYNLEAEKFDLQEKFKQQKYEINVLRNRINDNQKVSK	TNNT2	P45379	MAD	0	2.1	FALSE
HTP0087B	Plasma	SciLifeLab peptide array	TNNT3_HPRR3050240	RKPLNIDHLGEDKLRDKAKELWETLHQLEIDKFEFGEKLKRQKYDITTLRSRIDQAQKHSKKAGTPAKGKVG	TNNT3	P45378	MAD	0	0.2	FALSE
HTP0087B	Plasma	SciLifeLab peptide array	TNNT3_HPRR3890527	EEEAQEEAAEVHEEVHEPEEVQEDTAEEDAEEEKPRPKLTAPK	TNNT3	P45378	MAD	1	5	FALSE
HTP0087B	Plasma	SciLifeLab peptide array	TOP1_HPRR2420091	GDHLHNDSQIEADFRLNDSHKHKDKHKDREHRHKEHKKEKDREKSKHSNSEHKDSEKKHKEKEKTKHKDGSSEKH	TOP1	P11387	MAD	-1	0	FALSE
HTP0087B	Plasma	SciLifeLab peptide array	TOP1_HPRR2420092	KVRASGDAKIKKEKENGFSSPPQIKDEPEDDGYFVPPKEDIKPLKRPRDEDDADYKPKK	TOP1	P11387	MAD	-1	23.1	FALSE
HTP0087B	Plasma	SciLifeLab peptide array	TOP1_HPRR2420093	KKEKKRKLEEEEDGKLKKPKNKDKDKKVPEPDNKKKKPKKEEEQKWKWWEEERYPEGIKWKFLEHKGPVFAPPYEPLPENVKFYYD	TOP1	P11387	MAD	-1	2	FALSE
HTP0087B	Plasma	SciLifeLab peptide array	TOP2A_HPRR1370117	RGQRVIPRITIEMKAEAEKKNKKKIKNENTEGSPQEDGVELEGLKQRLEKKQKREPGTKTKKQTTLAFKPIKKGKKRNPWSDSESDRSSDESNFDVP	TOP2A	P11388	MAD	0	3.1	FALSE
HTP0087B	Plasma	SciLifeLab peptide array	TOP2A_HPRR1370118	DASPPKTKTSPKLSNKELKPQKSVVSDLEADDVKGSVPLSSSPPATHFPDETEITNPVPKKNVTVKKTAAKSQSSTSTTGAKKRAAPKGTKRDPALNSGVSQKPDPAKTKNRRKRKPSTSDDSDSNFEKIVSKAVTSKKSKG	TOP2A	P11388	MAD	2	22.2	FALSE
HTP0087B	Plasma	SciLifeLab peptide array	TPH1_HPRR1220002	ISELKHALSGHAKVKPFDPKITCKQECLITTFQDVYFVSESFEDAKEKMREFTKTIKRPFGVKYNPYTRSIQILKDTKSITSAMNELQHDLDVVSDALAKVSRKPSI	TPH1	P17752	MAD	1	1	FALSE
HTP0087B	Plasma	SciLifeLab peptide array	TPM4*_HPRR3340170	EMQLKEAKHIAEEADRKYEEVARKLVILE	TPM4*	P67936;P07951;P09493;P06753	MAD	1	16	FALSE
HTP0087B	Plasma	SciLifeLab peptide array	TPM4*_HPRR3340171	KAADESERGMKVIENRAMKDEEKMEIQE	TPM4*	P67936;P07951;P09493;P06753	MAD	-1	0	FALSE
HTP0087B	Plasma	SciLifeLab peptide array	TPM4*_HPRR3340172	LNRRIQLVEEELDRAQERLATALQKLEE	TPM4*	P67936;P07951;P09493;P06753	MAD	7	11.1	FALSE
HTP0087B	Plasma	SciLifeLab peptide array	TPO_HPRR1950563	RELEKHSLSRVICDNTGLTRVPMDAFQVGKFPEDFESCDSITGMNLEAWRETFPQDDKCGFPESVENGDFVHCEESGRRVLVYSCRHGYELQGREQLTCTQEGWDFQPPLCKDVNECADGA	TPO	P07202	MAD	-1	22.9	FALSE
HTP0087B	Plasma	SciLifeLab peptide array	TPO_HPRR4180385	STVICRWTRTGTKSTLPISETGGGTPELRCGKHQAVGTSPQRAAAQDSEQESAGMEGRDTHRLPRA	TPO	P07202	MAD	2	59.6	FALSE
HTP0087B	Plasma	SciLifeLab peptide array	TRIM21_HPRR1060031	LEKDEREQLRILGEKEAKLAQQSQALQELISELDRRCHSS	TRIM21	P19474	MAD	0	15.4	FALSE
HTP0087B	Plasma	SciLifeLab peptide array	TRIM24_HPRR3500066	NCAEFNEPDSEVANAGIKLENYFEELLKNLYPEKRFPKPEFRNESEDNKFSDDSDDDFVQPRKKRLKSIEERQLLK	TRIM24	O15164	MAD	0	21.2	FALSE
HTP0087B	Plasma	SciLifeLab peptide array	TRIM24_HPRR3500067	SSPVGGSYNLPSLPDIDCSSTIMLDNIVRKDTNIDHGQPRPPSNRTVQSPNSSVPSPGLAGPVTMTSVHPPIRSPSA	TRIM24	O15164	MAD	-1	0	FALSE
HTP0087B	Plasma	SciLifeLab peptide array	TRIM28_HPRR4180661	TDSTFSLDQPGGTLDLTLIRARLQEKLSPPYSSPQEFAQDVGRMFKQFNKLTEDKADVQSIIGLQRFFETRMNEAFGDTKFSAVLV	TRIM28	Q13263	MAD	1	1	FALSE
HTP0087B	Plasma	SciLifeLab peptide array	TRIM33_HPRR640002	MQPHLQRQHSNPGHAGPFPVVSVHNTTINPTSPTTATMANANRGPTSPSVTAIELIPSVTNPENLPSLPDIPPIQLEDAGSSSLDNLLSRYISGSHLPPQPTSTMNPSPGPSALSPGSSGLSNSHTPVRPPSTSSTGSR	TRIM33	Q9UPN9	MAD	0	7	FALSE
HTP0087B	Plasma	SciLifeLab peptide array	TROVE2_HPRR400060	ESVNQMQPLNEKQIANSQDGYVWQVTDMNRLHRFLCFGSEGGTYYIKEQKLGLENAEALIRLIEDGRGCEVIQEIKSFSQEGRTTKQEPMLFALAICSQCSDISTKQAAFKAVSEVCRIPTHLFTFIQFKKDLKESMKCGMWG	TROVE2	P10155	MAD	2	4	FALSE
HTP0087B	Plasma	SciLifeLab peptide array	TROVE2_HPRR400061	FLLAVDVSASMNQRVLGSILNASTVAAAMCMVVTRTEKDSYVVAFSDEMVPCPVTTDMTLQQVLMAMSQIPAGGTDCSLPMIWAQKTNTPADVFIVFTDNETFAGGVHPAIALREYRKKMDIPAKLIVCGMTSNGF	TROVE2	P10155	MAD	-2	-2	FALSE
HTP0087B	Plasma	SciLifeLab peptide array	TRPC3_HPRR2870071	NFPKCRRRRLQKDIEMGMGNSKSRLNLFTQSNSRVFESHSFNSILNQPTRYQQI	TRPC3	Q13507	MAD	0	2.1	FALSE
HTP0087B	Plasma	SciLifeLab peptide array	TSGA10_HPRR2920463	IASLGESLAMKEKTISGMKNIIAEMEQASRQCTEALIVCEQDVSRMRRQLDETNDELAQIARERDILAHDNDNLQEQFAKAKQENQ	TSGA10	Q9BZW7	MAD	2	19.9	FALSE
HTP0087B	Plasma	SciLifeLab peptide array	TSGA10_HPRR2920464	RREMMKSCKSPKSTTAHAILRRVETERDVAFTDLRRMTTERDSLRERLKIAQETAFNEKAHLEQRIEELECTVHNLDDERMEQMSNM	TSGA10	Q9BZW7	MAD	0	19.3	FALSE
HTP0087B	Plasma	SciLifeLab peptide array	TSHR_HPRR141622	RADLSYPSHCCAFKNQKKIRGILESLMCNESSMQSLRQRKSVNALNSPLHQEYEENLGDSIVGYKEKSKFQDTHNNAHYYVFFEEQEDEIIGFGQELKNPQEETLQAFDSHYDYTICGDSEDMVCTPKSDEFNPC	TSHR	P16473	MAD	-2	-1	FALSE
HTP0087B	Plasma	SciLifeLab peptide array	TSHR_HPRR4220232	MGCSSPPCECHQEEDFRVTCKDIQRIPSLPPSTQTLKLIETHLRTIPSHAFSNLPNISRIYVSIDVTLQQLESHSF	TSHR	P16473	MAD	-1	-1	FALSE
HTP0087B	Plasma	SciLifeLab peptide array	TTN_HPRR1830052	GTVSTSCYLAVQVSEEFEKETTAVTEKFTTEEKRFVESRDVVMTDTSLTEEQAGPGEPAAPYFITKPVVQKLVEGGSVVFGCQVGGNPKPHVYWKKSGVPLTTGYRYKVSYNKQTGECKLVISMTFADDAGEYT	TTN	Q8WZ42	MAD	7	7	FALSE
HTP0087B	Plasma	SciLifeLab peptide array	TTN_HPRR1830053	HFLSILTIDTSDAEDYSCVLVEDENVKTTAKLIVEGAVVEFVKELQDIEVPESYSGELECIVSPENIEGKWYHNDVELKSNGKYTITSRRGRQNLTVKDVTKEDQGEYSFVIDGKKTTCKLKMK	TTN	Q8WZ42	MAD	-1	4.1	FALSE
HTP0087B	Plasma	SciLifeLab peptide array	UBA1_HPRR232462	KISFKSLVASLAEPDFVVTDFAKFSRPAQLHIGFQALHQFCAQHGRPPRPRNEEDAAELVALAQAVNARALPAVQQNNLDEDLIRKLAYVAAGDLAPINAFIGGLAAQEVMKACSGKFMPIMQWLYFDALECLPEDKEVLTEDKCLQR	UBA1	P22314	MAD	1	3	FALSE
HTP0087B	Plasma	SciLifeLab peptide array	UBA1_HPRR232463	LYKVVQGHRQLDSYKNGFLNLALPFFGFSEPLAAPRHQYYNQEWTLWDRFEVQGLQPNGEEMTLKQFLDYFKTEHKLEITMLSQGVSMLYSFFMPAAKLKERLDQPMTEIVSRVSKRKLGRHVRALVLELCCNDESGEDVEVPYVRYTIR	UBA1	P22314	MAD	4	5	FALSE
HTP0087B	Plasma	SciLifeLab peptide array	UGT1A1_HPRR3790923	SHWLSMLGAIQQLQQRGHEIVVLAPDASLYIRDGAFYTLKTYPVPFQREDVKES	UGT1A1	P22309	MAD	0	0	FALSE
HTP0087B	Plasma	SciLifeLab peptide array	UGT1A5*_HPRR4420458	HRSCVELLHNEALIRHLHATSFDVVLTDP	UGT1A5*	P35504;P22310;P35503	MAD	-1	7.1	FALSE
HTP0087B	Plasma	SciLifeLab peptide array	UGT1A6_HPRR3761044	WLSMKDIVEVLSDRGHEIVVVVPEVNLLLKESKYYTRKIYPVPYDQEELKNRYQSFGNNHFAERSFLTAPQTEYRNNMIVIGLY	UGT1A6	P19224	MAD	-1	0	FALSE
HTP0087B	Plasma	SciLifeLab peptide array	UGT1A8*_HPRR3340348	QPVKPLDRAVFWIEFVMRHKGAKHLRVAAHDLTWFQYHSL	UGT1A8*	Q9HAW9;Q9HAW8;O60656;Q9HAW7;P19224;P35504;P22310;P35503;P22309;O75795;P54855;P36537;Q6UWM9;P16662;O75310;Q9BY64;P06133;Q9Y4X1	MAD	0	1	FALSE
HTP0087B	Plasma	SciLifeLab peptide array	UGT2A1_HPRR1951665	KEHNVTVLVASGALFITPTSNPSLTFEIYKVPFGKERIEGVIKDFVLTWLENRPSPSTIWRFYQEMAKVIKDFHMVSQEICDGVLKNQQLMAKLKKSKFEVLVSDPVFPCGDIVALKLGIPFMYS	UGT2A1	Q9Y4X1	MAD	5	6	FALSE
HTP0087B	Plasma	SciLifeLab peptide array	VCL_HPRR350132	KMIDERQQELTHQEHRVMLVNSMNTVKELLPVLISAMKIFVTTKNSKNQGIEEALKNRNFTVEKMSAEINEIIRVLQLTSWDEDAWASKDTEAMKRALASIDSKLNQAKGWLRDPSASPGDAGEQAIRQILDEAGKVGELCAGKERREI	VCL	P18206	MAD	0	6.1	FALSE
HTP0087B	Plasma	SciLifeLab peptide array	VCL_HPRR4160211	SALTSKLADLRRQGKGDSPEARALAKQVATALQNLQTKTNRAVANSRPAKAAVHLEGKIEQAQRWIDNPTVDDRGVGQAAIRGLVAEGHRLANVMMGP	VCL	P18206	MAD	2	4	FALSE
HTP0087B	Plasma	SciLifeLab peptide array	VIM_HPRR370004	FANYIDKVRFLEQQNKILLAELEQLKGQGKSRLGDLYEEEMRELRRQVDQLTNDKARVEVERDNLAEDIMRLREKLQEEMLQREEAENTLQSFRQDVDNASLARLDLERKVES	VIM	P08670	MAD	1	2	FALSE
HTP0087B	Plasma	SciLifeLab peptide array	WARS_HPRR141609	TDSDCIGKISFPAIQAAPSFSNSFPQIFRDRTDIQCLIPCAIDQDPYFRMTRDVAPRIGYPKPALLHSTFFPALQGAQTKMSASDPNSSIFLTDTAKQIKTKVNKHAFSGGRDTIEEHRQFGGNCDVDVSFMYLTF	WARS	P23381	MAD	-1	0	FALSE
HTP0087B	Plasma	SciLifeLab peptide array	WARS_HPRR141610	DATEAEEDFVDPWTVQTSSAKGIDYDKLIVRFGSSKIDKELINRIERATGQRPHHFLRRGIFFSHRDMNQVLDAYENKKPFYLYTGRGPSSEAMHVGHLIPFIFTKWLQDVFNVPLVIQMTDDEKYLWKDLTLDQAYSYAVENA	WARS	P23381	MAD	6	6	FALSE
HTP0087B	Plasma	SciLifeLab peptide array	XKR6_HPRR2540593	YGVLHPTGPRAKILASSCCAELLWGIPLPPDVEPMAPEIPGYRGTQVTPTRAVTEQQEDLTADTCLPVFQVRPMGPPTPLGRPYLPEGPLIKIDMPR	XKR6	Q5GH73	MAD	-2	0.1	FALSE
HTP0087B	Plasma	SciLifeLab peptide array	XKR6_HPRR4040109	FVDRRLRRTINILQYVTPTAVGIRYRDGPLLYELLQYESSL	XKR6	Q5GH73	MAD	1	1	FALSE
HTP0087B	Plasma	SciLifeLab peptide array	XKR8_HPRR3410225	GLLVWQQEEPSEFDLAYADFLALDISM	XKR8	Q9H6D3	MAD	-1	2.1	FALSE
HTP0087B	Plasma	SciLifeLab peptide array	XKR8_HPRR3410226	HPSCCWKPDPDQVDGARSLLSPEGYQLPQNRRMTHLAQKFFPKAKDEAASPVKG	XKR8	Q9H6D3	MAD	-1	2	FALSE
HTP0087B	Plasma	SciLifeLab peptide array	XKR9_HPRR2180234	FHPNRSAETKCDEIDGKPVLRECRMRYFLME	XKR9	Q5GH70	MAD	6	5.1	TRUE
HTP0087B	Plasma	SciLifeLab peptide array	YARS_HPRR2320095	GNVENNGVLSFIKHVLFPLKSEFVILRDEKWGGNKTYTAYVDLEKDFAAEVVHPGDLKNSVEVALNKLLDPIREKFNTPALKKLASAAYPDPSKQKPMAKGPAKNSEPEEVIPSRLDIRVGKIITVEKHPDAD	YARS	P54577	MAD	0	15.7	FALSE
HTP0087B	Plasma	SciLifeLab peptide array	YARS_HPRR2320096	VLCNLKPQKMRGVESQGMLLCASIEGINRQVEPLDPPAGSAPGEHVFVKGYEKGQPDEELKPKKKVFEKLQADFKISEECIAQWKQTNFMTKLGSIS	YARS	P54577	MAD	-1	1	FALSE
HTP0087B	Plasma	SciLifeLab peptide array	ZNF688_HPRR3610291	QWIHRSCSGGRRGRRPGIRAVPRAPVRGDRDPPVLFRHYPDIFEECG	ZNF688	P0C7X2	MAD	0	1	FALSE
HTP0087B	Plasma	SciLifeLab peptide array	ZNF688_HPRR3610292	GERLGGARRGDVPNRKEEEPEEVPRAKGPRKAPVKESPEVLVERNPDPAISVAPARAQPPKNAAWDPTTGAQ	ZNF688	P0C7X2	MAD	59	316.9	FALSE
HTP0391A	Plasma	SciLifeLab peptide array	A2M_HPRR350039	SVLLMKPDAELSASSVYNLLPEKDLTGFPGPLNDQDDEDCINRHNVYINGITYTPVSSTNEKDMYSFLEDMGLKAFTNSKIRKPKMCPQLQQYEMHGPEGLRVGFYESDVMGRGHARLVHVEEPHTETVRKYFPETWIWDLVVVNS	A2M	P01023	MAD	1	3	FALSE
HTP0391A	Plasma	SciLifeLab peptide array	AARS_HPRR3160056	DRASKADVQKRVLEKTKQFIDSNPNQPLVILEMESGASAKALNEALKLFKMHSPQTSAMLFTVDNEAGKITCLCQVPQNAANRGLKASEWVQQVSGLMDGKGGGKD	AARS	P49588	MAD	16	7.1	TRUE
HTP0391A	Plasma	SciLifeLab peptide array	AARS_HPRR3160058	EFTVKNAQVRGGYVLHIGTIYGDLKVGDQVWLFIDEPRRRPIMSNHTATHILNFALRSVLGEADQKGSLVAPDRLRFDFTAKGAMSTQQIKKAEEIANEMIEAAKAVYTQDCP	AARS	P49588	MAD	1	1	FALSE
HTP0391A	Plasma	SciLifeLab peptide array	ABCC8_HPRR2060003	DHLGKENDVFQPKTQFLGVYFVSSQ	ABCC8	Q09428	MAD	1	2	FALSE
HTP0391A	Plasma	SciLifeLab peptide array	ABCC8_HPRR4160072	VSVQKLSEFLSSAEIREEQCAPHEPTPQGPASKYQAVPLRVVNRKRPAREDCRGLTGPLQSLVPSADGDADNCCVQIMGGYFTWTPD	ABCC8	Q09428	MAD	0	1.1	FALSE
HTP0391A	Plasma	SciLifeLab peptide array	ACHE_HPRR2440120	RGIRLKTPGGPVSAFLGIPFAEPPMGPRRFLPPEPKQPWSGVVDATTFQSVCYQYVDTLYPGFEGTEMWNPNRE	ACHE	P22303	MAD	0	1.1	FALSE
HTP0391A	Plasma	SciLifeLab peptide array	ACHE_HPRR3870163	TVGMGEARRRATQLAHLVGCPPGGTGGNDTELVACLRTRPAQVLVNHEWHVLPQESVFRFSFVPVVDGDFLSDTPEALINAGDFHG	ACHE	P22303	MAD	4	1	TRUE
HTP0391A	Plasma	SciLifeLab peptide array	ACTA2*_HPRR3230094	PKANREKMTQIMFETFNTPAMYVAIQ	ACTA2*	P62736;P63267;A5A3E0;P0CG38;P0CG39;Q6S8J3;P63261;P60709;P68032;P68133;Q562R1	MAD	1	8	FALSE
HTP0391A	Plasma	SciLifeLab peptide array	ACTA2*_HPRR3230096	MVGMGQKDSYVGDEAQSKRGILTLKYPIEHGIVTNWD	ACTA2*	P62736;P63267;A5A3E0;P0CG38;P0CG39;Q6S8J3;P63261;P60709;P68032;P68133;Q562R1	MAD	-1	0	FALSE
HTP0391A	Plasma	SciLifeLab peptide array	AIMP1_HPRR2310067	CNLKPAKMRGVLSQAMVMCASSPEKIEILAPPNGSVPGDRITFDAFPGEPDKELNPKKKIWEQIQPDLHTNDECVATYKGVPFEVKGKGVCRAQTMSNSGI	AIMP1	Q12904	MAD	6	1	TRUE
HTP0391A	Plasma	SciLifeLab peptide array	AIMP1_HPRR2310068	MANNDAVLKRLEQKGAEADQIIEYLKQQVSLLKEKAILQATLREEKKLRVENAKLKKEIEELKQELIQAEIQNGV	AIMP1	Q12904	MAD	75	67.3	TRUE
HTP0391A	Plasma	SciLifeLab peptide array	AIMP1_HPRR2310069	TPLHANSMVSENVIQSTAVTTVSSGTKEQIKGGTGDEKKAKEKIEKKGEKKEKKQQSIAGSADSKPIDVSRLDLRIGCIITARKHPDADSLY	AIMP1	Q12904	MAD	0	38	FALSE
HTP0391A	Plasma	SciLifeLab peptide array	AIMP2_HPRR2440262	APLRVELPTCMYRLPNVHGRSYGPAPGAGHVQEESNLSLQALESRQDDILKRLYELKAAVDGLSKMIQTPDADLDVTNIIQADEPTTLTTNAL	AIMP2	Q13155	MAD	5	2.2	TRUE
HTP0391A	Plasma	SciLifeLab peptide array	AIMP2_HPRR2440263	SVLGKDYGALKDIVINANPASPPLSLLVLHRLLCEHFRVLSTVHTHSSVKSVPENLLKCFGEQNKKQPRQDYQLGFTLIWKNVPKTQ	AIMP2	Q13155	MAD	-1	-0.9	FALSE
HTP0391A	Plasma	SciLifeLab peptide array	AIMP2_HPRR2440264	IARFLFSLFGQKHNAVNATLIDSWVDIAIFQLKEGSSKEKAAVFRSMNSALGKSPWLAGNELTVADVVLWSVLQQIGGCSVTVPANVQRWMRSCENLAPFNTALKLLK	AIMP2	Q13155	MAD	1	2	FALSE
HTP0391A	Plasma	SciLifeLab peptide array	ALOX12_HPRR1960006	YAWVPNAPCTMRMPPPTTKEDVTMATVMGSLPDVRQACLQMAISWHLSRRQPDMVPLGHHKEKYFSGPKPKAVLNQFRTDLEKLEKEITARNEQLDWPYEY	ALOX12	P18054	MAD	0	1	FALSE
HTP0391A	Plasma	SciLifeLab peptide array	ALOX12_HPRR1960007	PGDNALDMFQKHREKELKDRQQIYCWATWKEGLPLTIAADRKDDLPPNMRFHEEKRLDFEWTLKAGALEMALKRVYTLLSSWNCLEDFDQIFWGQKSALAEKVRQCWQDDELFSYQFLNGANP	ALOX12	P18054	MAD	-1	0	FALSE
HTP0391A	Plasma	SciLifeLab peptide array	ANO2_HPRR3070034	PTDISDQIKKEKSLLVDFFLKEEHEKLKLMDEPALRSPGGGDRSRSRAASSAPSGQSQLGSMMSSGSQHTNV	ANO2	Q9NQ90	MAD	2	8.2	FALSE
HTP0391A	Plasma	SciLifeLab peptide array	ANO2_HPRR3070036	EPVSLEARLSRMHFHDSQRKVDYVLAYHYRKRGVHLAQGFPGHSLAIVSNGETGKEPHAGGPGDIELGPLDALEEERKEQREEFEHNLM	ANO2	Q9NQ90	MAD	0	17.4	FALSE
HTP0391A	Plasma	SciLifeLab peptide array	ANO2_HPRR3070037	IPLLPGSPRRLSPQAGSRGGQGPKHGQQCLKMPGPRAPGLQGGSNRDPGQPCGGESTRSSSVINNYLDAN	ANO2	Q9NQ90	MAD	0	1	FALSE
HTP0391A	Plasma	SciLifeLab peptide array	ANXA2_HPRR3460748	YDAGVKRKGTDVPKWISIMTERSVPHLQKVFDRYKSYSPYDMLESIRKEVKGDLENAFLNLVQCIQNKPLYFADRLYDSMKGKG	ANXA2	P07355	MAD	-1	0	FALSE
HTP0391A	Plasma	SciLifeLab peptide array	ANXA2_HPRR3460749	MGRQLAGCGDAGKKASFKMSTVHEILCKLSLEGDHSTPPSAYGSVKAYTNFDAERDALNIETAIKTKGVDEVTIVNI	ANXA2	P07355	MAD	1	48.1	FALSE
HTP0391A	Plasma	SciLifeLab peptide array	ANXA5_HPRR1350096	GTVTDFPGFDERADAETLRKAMKGLGTDEESILTLLTSRSNAQRQEISAAFKTLFGRDLLDDLKSELTGKFEKLIVALMKPSRLYDAYELKHALKGAGTNEKVLTEIIASRTPEELRAIKQVYEEEYGSSLEDDVVG	ANXA5	P08758	MAD	-1	8.1	FALSE
HTP0391A	Plasma	SciLifeLab peptide array	ANXA5_HPRR1350097	LVVLLQANRDPDAGIDEAQVEQDAQALFQAGELKWGTDEEKFITIFGTRSVSHLRKVFDKYMTISGFQIEETIDRETSGNLEQLLLAVVKSIRSIPAYLAETLYYAMKGAG	ANXA5	P08758	MAD	-1	11	FALSE
HTP0391A	Plasma	SciLifeLab peptide array	APOH_HPRR350085	EPGEEITYSCKPGYVSRGGMRKFICPLTGLWPINTLKCTPRVCPFAGILENGAVRYTTFEYPNTISFSCNTGFYLNGADSAKCTEEGKWSPELPVCAPIICPPPSIPTFATLRVYKPSAGNNSLYRDTAVFECLPQHAMFGNDTITC	APOH	P02749	MAD	1	4	FALSE
HTP0391A	Plasma	SciLifeLab peptide array	AQP4_HPRR4040261	MSDRPTARRWGKCGPLCTRENIMVAFKGVWTQAFWKA	AQP4	P55087	MAD	0	1	FALSE
HTP0391A	Plasma	SciLifeLab peptide array	ARFGAP1_HPRR3300073	TLPSMVHRVSGQPQSVTASSDKAFEDWLNDDLGSYQGAQGNRYVGFGNTPPPQKKEDDFLNNAMSSLYSGWSSFTTGASRFASAAKEGATKFGSQASQKASEL	ARFGAP1	Q8N6T3	MAD	853	324.3	TRUE
HTP0391A	Plasma	SciLifeLab peptide array	ARFGAP1_HPRR3300076	DHFQNSNIDQSFWETFGSAEPTKTRKSPSSDSWTCADTSTERRSSDSWEVWGSASTNRNSNSDGGEGGEGTKKAVPPAVPTDDGWD	ARFGAP1	Q8N6T3	MAD	-1	9.1	FALSE
HTP0391A	Plasma	SciLifeLab peptide array	CACNA1S_HPRR3410011	EEEKSTMAKKLEQKPKGEGIPTTAKLKIDEFESNVNEVKDPYPSADFPGDDEEDEPEIPLSPRPRPLAEL	CACNA1S	Q13698	MAD	3	16.6	FALSE
HTP0391A	Plasma	SciLifeLab peptide array	CACNA1S_HPRR3410014	ESPVFLEDFPQDPRTNPLARANTNNANANVAYGNSNHSNSHVFSSVHYEREFPEETETPATRGRALGQPCRVLGPHSKPCVE	CACNA1S	Q13698	MAD	0	16	FALSE
HTP0391A	Plasma	SciLifeLab peptide array	CARS_HPRR400045	SQCNLYMAARKAVRKRPNQALLENIALYLTHMLKIFGAVEEDSSLGFPVGGPGTSLSLEATVMPYLQVLSEFREGVRKIAREQKVPEILQLSDALRDNILPELGVRFEDHEGLPTVVKLVDRNTLLKEREEKRRVE	CARS	P49589	MAD	0	3	FALSE
HTP0391A	Plasma	SciLifeLab peptide array	CARS_HPRR400046	HLFEQYREKRPEAAQLLEDVQAALKPFSVKLNETTDPDKKQMLERIQHAVQLATEPLEKAVQSRLTGEEVNSCVEVLLEEAKDLLSDWLDSTLGCDVTDNSIFSKLPKFWEGDFHRDMEALNVLPPDVL	CARS	P49589	MAD	-1	4	FALSE
HTP0391A	Plasma	SciLifeLab peptide array	CASR_HPRR3140049	ADDDYGRPGIEKFREEAEERDICIDFSELISQYSDEEEIQHVVEVIQNSTAKVIVVFSSGPDLEPLIKEIVRRNITGKIWLASEAWASSSLI	CASR	P41180	MAD	-1	-1	FALSE
HTP0391A	Plasma	SciLifeLab peptide array	CASR_HPRR3140052	GTVTFSLSFDEPQKNAMAHRNSTHQNSLEAQKSSDTLTRHQPLLPLQCGETDLDLTVQETGLQGPVGGDQRPEVEDPEELSPALVVSSSQSFVISGG	CASR	P41180	MAD	-1	5.2	FALSE
HTP0391A	Plasma	SciLifeLab peptide array	CAST_HPRR3010396	STYIEELGKREVTIPPKYRELLAKKEGITGPPADSSKPIGPDDAIDALSSDFTCGSPTAAGKKTEKEESTEVLKAQSAGTVRSAAP	CAST	P20810	MAD	-1	6.5	FALSE
HTP0391A	Plasma	SciLifeLab peptide array	CAST_HPRR3010397	GPQNASSLKFEDAKLAAAISEVVSQTPASTTQAGAPPRDTSQSDKDLDDALDKLSDSLGQRQPDPDENKPMEDKVKE	CAST	P20810	MAD	-1	42.2	FALSE
HTP0391A	Plasma	SciLifeLab peptide array	CENPA_HPRR3730167	PSLGASSHQHSRRRQGWLKEIRKLQKSTHLL	CENPA	P49450	MAD	-1	0	FALSE
HTP0391A	Plasma	SciLifeLab peptide array	CENPA_HPRR3890121	RKLPFSRLAREICVKFTRGVDFNWQAQALLAL	CENPA	P49450	MAD	1	2.1	FALSE
HTP0391A	Plasma	SciLifeLab peptide array	CENPB_HPRR3310037	ERGVVQQVKGHYRQAMLLKAMAALEGQDPSGLQLGLTEALHFVAAAWQAVEPSDIAACFREAGFGGGPNATITTSL	CENPB	P07199	MAD	1	1.1	FALSE
HTP0391A	Plasma	SciLifeLab peptide array	CENPB_HPRR3310039	TFREKSRIIQEVEENPDLRKGEIARRFNIPPSTLSTILKNKRAILASERKYGVASTCRKTNKLSPYDKLEGLLIAWFQQIRAAGLPVKGIIL	CENPB	P07199	MAD	-1	0	FALSE
HTP0391A	Plasma	SciLifeLab peptide array	CENPE_HPRR1470072	EKIENLTRMLVTSSSLTLQQELKAKRKRRVTWCLGKINKMKNSNYADQFNIPTNITTKTHKLSINLLREIDESVCSESDVFSNTLDTLSEIEWNPATKLLNQENIESELNSLRADYDN	CENPE	Q02224	MAD	0	3.1	FALSE
HTP0391A	Plasma	SciLifeLab peptide array	CENPE_HPRR4340147	MRVKANLSLPYLQTKHIEKLFTANQRCSMEFHRIMKKLKYVLSYVTKIKEEQHESINKFEMDFIDEVEKQKELLIKIQHLQQDCDVPSRELRDLKLNQNMD	CENPE	Q02224	MAD	0	0.1	FALSE
HTP0391A	Plasma	SciLifeLab peptide array	CENPF_HPRR1390029	SCWKSENEKLLTQMESEKENLQSKINHLETCLKTQQIKSHEYNERVRTLEMDRENLSVEIRNLHNVLDSKSVEVETQKLAYMELQQKAEFSDQKHQKEIENMCLKTSQLTGQVEDLEHKLQLLSNEIMDKDRCYQDLHAEYE	CENPF	P49454	MAD	15	96.8	FALSE
HTP0391A	Plasma	SciLifeLab peptide array	CENPF_HPRR1390030	CISELSFSGPNALVPMDFLGNQEDIHNLQLRVKETSNENLRLLHVIEDRDRKVESLLNEMKELDSKLHLQEVQLMTKIEACIELEKIVGELKKENSDLSEKLEYFSCDHQEL	CENPF	P49454	MAD	0	2	FALSE
HTP0391A	Plasma	SciLifeLab peptide array	CHD3_HPRR3420199	LKIKLGLLGGKREKGGSYVFQSDEGPEPEAEESDLDSGSVHSASGRPDGPVRTKKLKRGRPGRKKKKLLGCPA	CHD3	Q12873	MAD	0	1	FALSE
HTP0391A	Plasma	SciLifeLab peptide array	CHGA_HPRR300004	NSPMNKGDTEVMKCIVEVISDTLSKPSPMPVSQECFETLRGDERILSILRHQNLLKELQDLALQGAKERAHQQKKHSGFEDELSEVLENQSSQAELKEAVEEPSSKDVMEKREDSKEAEKSGEATDGARPQALPEPMQESK	CHGA	P10645	MAD	0	17.4	FALSE
HTP0391A	Plasma	SciLifeLab peptide array	CHRNA1_HPRR4110442	MKLGTWTYDGSVVAINPESDQPDLSNFMESGEWVIKESRGWKHSVTYSCCPDTPYLDITYHF	CHRNA1	P02708	MAD	-1	3	FALSE
HTP0391A	Plasma	SciLifeLab peptide array	CLDN11*_HPRR2010004	NDWVVTCGYTIPTCRKLDELGSKGLWADCVMATGLYHCKPLVDILILPGY	CLDN11*	O75508	MAD	0	1	FALSE
HTP0391A	Plasma	SciLifeLab peptide array	CLDN11_HPRR2010005	DAQAFGENRFYYTAGSSSPTHAKSAHV	CLDN11	O75508	MAD	0	3.3	FALSE
HTP0391A	Plasma	SciLifeLab peptide array	CNP_HPRR2500894	TLARVIVDKYRDGTKMVSADAYKITPGARGAFSEEYKRLDEDLAAYCRRRDIRILVLDDTNHERERLEQLFEMADQYQYQVVLVEPKTAWRLDCAQLKEKNQW	CNP	P09543	MAD	0	21.4	FALSE
HTP0391A	Plasma	SciLifeLab peptide array	CNP_HPRR2500896	PGVLHCTTKFCDYGKAPGAEEYAQQDVLKKSYSKAFTLTISALFVTPKTTGARVELSEQQLQLWPSDVDKLSPTDNLPRGSRAHITL	CNP	P09543	MAD	1	38.5	FALSE
HTP0391A	Plasma	SciLifeLab peptide array	COL17A1_HPRR3500044	NLPSHVWSSTLPAGSSMGTYHNNMTTQSSSLLNTNAYSAGSVFGVPNNMASCSPTLHPGLSTSSSVFGMQNNLAPSLTTLSHGTTTTSTA	COL17A1	Q9UMD9	MAD	-1	0	FALSE
HTP0391A	Plasma	SciLifeLab peptide array	COL17A1_HPRR3500046	DGTEVTERIVTETVTTRLTSLPPKGGTSNGYAKTASLGGGSRLEKQSLTHGSSGYINSTGSTRGHASTSSYRRAHSPASTLPNSPGSTFERKTHVTR	COL17A1	Q9UMD9	MAD	5	10	FALSE
HTP0391A	Plasma	SciLifeLab peptide array	CPE_HPRR270004	VLSANLHGGDLVANYPYDETRSGSAHEYSSSPDDAIFQSLARAYSSFNPAMSDPNRPPCRKNDDDSSFVDGTTNGGAWYSVPGGMQDFNYLSSNCFEITVELSCEKFPPEETLKTYWEDNKNSLISYLEQIHR	CPE	P16870	MAD	-1	5.1	FALSE
HTP0391A	Plasma	SciLifeLab peptide array	CPE_HPRR4180113	GNYKLTASAPGYLAITKKVAVPYSPAAGVDFELESFSERKEEEKEELMEWWKMMS	CPE	P16870	MAD	1	56.3	FALSE
HTP0391A	Plasma	SciLifeLab peptide array	CRYAB_HPRR2700063	RPFFPFHSPSRLFDQFFGEHLLESDLFPTSTSLSPFYLRPPSFLRAPSWFDTGLSEMRLEKDRFSVNLDVKHFSPEELKVKVLGDVIE	CRYAB	P02511	MAD	1	1	FALSE
HTP0391A	Plasma	SciLifeLab peptide array	CRYAB_HPRR3880249	KYRIPADVDPLTITSSLSSDGVLTVNGPRKQVSGPERTIPITREEKPAVTAA	CRYAB	P02511	MAD	0	7	FALSE
HTP0391A	Plasma	SciLifeLab peptide array	CYP11A1_HPRR2120012	RSVLVKGCQTFLSAPREGLGRLRVPTGEGAGISTRSPRPFNEIPSPGDNGWLNLYHFWRETGTHKVHLHHVQNFQKYGPIYREKLGNVESVYVIDPEDVALLFKSEGPNPERFLIPPWVAYHQYYQRPIGVLLKKSAA	CYP11A1	P05108	MAD	-1	1	FALSE
HTP0391A	Plasma	SciLifeLab peptide array	CYP17A1_HPRR670228	PFLPRHGHMHNNFFKLQKKYGPIYSVRMGTKTTVIVGHHQLAKEVLIKKGKDFSGRPQMATLDIASNNRKGIAFADSGAHWQLHRRLAMATFALFKDGDQKLEKIICQEISTLCDMLATHNGQSIDISFPVFVAVTNVISL	CYP17A1	P05093	MAD	0	0	FALSE
HTP0391A	Plasma	SciLifeLab peptide array	CYP1A2_HPRR2760237	YQDFDKNSVRDITGALFKHSKKGPRASGNLIPQEKIVNLVNDIFGAGFDTVTTAISWSLMYLVTKPEIQRK	CYP1A2	P05177	MAD	1	1.1	FALSE
HTP0391A	Plasma	SciLifeLab peptide array	CYP21A2_HPRR3440127	LIGGTETTANTLSWAVVFLLHHPEIQQRLQEELDHELGPGASSSRVPYKDRARLPLLNATIAEV	CYP21A2	P08686	MAD	-1	1	FALSE
HTP0391A	Plasma	SciLifeLab peptide array	CYP21A2_HPRR3440129	GLTQKFGPIYRLHLGLQDVVVLNSKRTIEEAMVKKWADFAGRPEPLTYKLVSRNYPDLSLGDYSLLW	CYP21A2	P08686	MAD	-1	0	FALSE
HTP0391A	Plasma	SciLifeLab peptide array	CYP2D6_HPRR3440145	EYDDPRFLRLLDLAQEGLKEESGFLREVLNAVPVLLHIPALAGKVLRFQKAFLTQLDELLTEHRMTWDPAQPPRDLTE	CYP2D6	P10635	MAD	0	2	FALSE
HTP0391A	Plasma	SciLifeLab peptide array	CYP2D6_HPRR3440146	KGTTLITNLSSVLKDEAVWKKPFRF	CYP2D6	P10635	MAD	0	6.1	FALSE
HTP0391A	Plasma	SciLifeLab peptide array	DARS_HPRR2370049	DKYPLAVRPFYTMPDPRNPKQSNSYDMFMRGEEILSGAQRIHDPQLLTERALHHGIDLEKIKAYIDSFRFGAPPHAGGGIGLERVTMLFLGLHNVRQTSMFPRD	DARS	P14868	MAD	2	5	FALSE
HTP0391A	Plasma	SciLifeLab peptide array	DARS_HPRR2370051	LHVQKIYVISLAEPRLPLQLDDAVRPEAEGEEEGRATVNQDTRLDNRVIDLRTSTSQAVFRLQSGICHLFRETLINKGFVEIQTPKIISAASEGGANVFTVSYFKNNAYLAQSPQLYKQMCICAD	DARS	P14868	MAD	2	10	FALSE
HTP0391A	Plasma	SciLifeLab peptide array	DBT_HPRR2550879	YVCFFGYPSFKYSHPHHFLKTTAALRGQVVQFKLSDIGEGIREVTVKEWYVKEGDTVSQFDSICEVQSDKASVTI	DBT	P11182	MAD	1	2	FALSE
HTP0391A	Plasma	SciLifeLab peptide array	DBT_HPRR2550880	VGKPLVDIETEALKDSEEDVVETPAVSHDEHTHQEIKGRKTLATPAVRRLAMENNIKLSEVVGSGKDGRILKEDILNYLEKQ	DBT	P11182	MAD	2	10.1	FALSE
HTP0391A	Plasma	SciLifeLab peptide array	DBT_HPRR2550882	LQFPILNASVDENCQNITYKASHNIGIAMDTEQGLIVPNVKNVQICSIFDIATELNRLQKLGSVGQLSTTDLTGGTFTLSNIGSIGGTFAKPVIMPPEVAIGA	DBT	P11182	MAD	-1	7.9	FALSE
HTP0391A	Plasma	SciLifeLab peptide array	DLAT_HPRR3050438	LLPALSPTMTMGTVQRWEKKVGEKLSEGDLLAEIETDKATIGFEVQEEGYLAKILVPEGTRDVPLGTPLCIIVEKEADISAFADYRPTEVTDLKPQVPPPT	DLAT	P10515	MAD	-1	49.5	FALSE
HTP0391A	Plasma	SciLifeLab peptide array	DLST_HPRR140690	QNTCAMLTTFNEIDMSNIQEMRARHKEAFLKKHNLKLGFMSAFVKASAFALQEQPVVNAVIDDTTKEVVYRDYIDISVAVATPRGLVVPVIRNVEAMNFADIERTITELGEKARKNELAIEDMDGGTFTISNGGVFGSLFGTPII	DLST	P36957	MAD	0	1	FALSE
HTP0391A	Plasma	SciLifeLab peptide array	DLST_HPRR4210012	PLCVSGVQPLALRLPEGELPSRETFPACINNS	DLST	P36957	MAD	0	0.1	FALSE
HTP0391A	Plasma	SciLifeLab peptide array	DPF2_HPRR2250142	SFPSIKPDTDQTLKKEGLISQDGSSLEALLRTDPLEKRGAPDPRVDDDSLGEFPVTNSRARKRILEPDDFLDDLDDEDYEEDTPKRRGKGKSKGKGVGS	DPF2	Q92785	MAD	0	11.1	FALSE
HTP0391A	Plasma	SciLifeLab peptide array	DPF2_HPRR3890698	AEEEGEDKEDSQPPTPVSQRSEEQKSKKGPDGLALPNNY	DPF2	Q92785	MAD	-1	1	FALSE
HTP0391A	Plasma	SciLifeLab peptide array	DSC1_HPRR1950849	SCTGTLVVHLDDYNDHAPQIDKEVTICQNNEDFAVLKPVDPDGPENGPPFQFFLDNSASKNWNIEEKDGKTAILRQRQNLDYNYYSVPIQIKDRHGLVATHMLTVRVCDCSTPSECRMKDKSTR	DSC1	Q08554	MAD	1	5.6	FALSE
HTP0391A	Plasma	SciLifeLab peptide array	DSG1_HPRR1370121	SLQLSIGVRNKAEFHHSIMSQYKLKASAISVTVLNVIEGPVFRPGSKTYVVTGNMGSNDKVGDFVATDLDTGRPSTTVRYVMGNNPADLLAVDSRTGKLTLKNKVTKEQYNMLGGKYQGTILSIDDNLQRTCTGT	DSG1	Q02413	MAD	1	2	FALSE
HTP0391A	Plasma	SciLifeLab peptide array	DSG1_HPRR4180926	EPVPECSDGAIHSWAVEGPQPEPRDITTVIPQIPPDNANIIECIDNSGVYTNEYGGREMQDLGGGERMTGFELTEGVKTSGMPEICQEYSG	DSG1	Q02413	MAD	0	10.5	FALSE
HTP0391A	Plasma	SciLifeLab peptide array	DSG3_HPRR3120202	FRPASKTFTVQKGISSKKLVDYILGTYQAIDEDTNKAASNVKYVMGRNDGGYLMIDSKTAEIKFVKNMNRDSTFIVNKTITAEVLAIDEYTGKTSTGTVYVRVPDFND	DSG3	P32926	MAD	4	6	FALSE
HTP0391A	Plasma	SciLifeLab peptide array	DSG3_HPRR3120203	SSPSVVVSARTLNNRYTGPYTFALEDQPVKLPAVWSITTLNATSALLRAQEQIPPGVYHISLVLTDSQNNRCEMPRSLTLEVCQCDNRGICGTSY	DSG3	P32926	MAD	1	1	FALSE
HTP0391A	Plasma	SciLifeLab peptide array	DST_HPRR2620326	KPRCQNVAEDMDIQLCASILNENSDENENINTMILLDKMHSCSSLEKQQRVNVVQLASPSENNLVTEKSNLPEYTTEIAGKSKENLLNHE	DST	Q03001	MAD	0	28.3	FALSE
HTP0391A	Plasma	SciLifeLab peptide array	DST_HPRR2620328	MLPGEHQQVLSNLQSRFEDFLEDSQESQVFSGSDITQLEKEVNVCKQYYQELLKSAEREEQEESVYNLYISEVRNIRLRLENCEDRLIRQIRTPLERDDLHESVF	DST	Q03001	MAD	-1	4.2	FALSE
HTP0391A	Plasma	SciLifeLab peptide array	EGFR_HPRR290109	QQGFFSSPSTSRTPLLSSLSATSNNSTVACIDRNGLQSCPIKEDSFLQRYSSDPTGALTEDSIDDTFLPVPEYINQSVPKRPAGSVQNPVYHNQPLNPAPSRDPHYQDPHSTAVGNPEYLNTVQPTCVNSTFDSPAHWAQKGSHQISLD	EGFR	P00533	MAD	3	25.1	FALSE
HTP0391A	Plasma	SciLifeLab peptide array	ENO3*_HPRR3360053	DGTENKSKFGANAILGVSLAVCKAG	ENO3*	P13929;P09104;P06733	MAD	0	0	FALSE
HTP0391A	Plasma	SciLifeLab peptide array	ENO3*_HPRR4290181	QACKLAQENGWGVMVSHRSGETEDTFIADLVVGLCTGQIKTGAPCRSERLAKYNQLMRIEEE	ENO3*	P13929;P09104;P06733	MAD	0	0.1	FALSE
HTP0391A	Plasma	SciLifeLab peptide array	ENO3*_HPRR4370068	LKNVIKEKYGKDATNVGDEGGFAPNIL	ENO3*	P13929;P09104;P06733	MAD	81	10.1	TRUE
HTP0391A	Plasma	SciLifeLab peptide array	ENO3_HPRR252476	ALELLKTAIQAAGYPDKVVIGMDVAASEFYRNGKYDLDFKSPDDPARHITGEKLGELYKSFIKNYPVVSIEDPFDQDDWATWTSFLSGVNIQIVGDDLTVTN	ENO3	P13929	MAD	1	6	FALSE
HTP0391A	Plasma	SciLifeLab peptide array	F12_HPRR350057	YHKCTHKGRPGPQPWCATTPNFDQDQRWGYCLEPKKVKDHCSKHSPCQKGGTCVNMPSGPHCLCPQHLTGNHCQKEKCFEPQLLRFFHKNEIWYRTEQAAVARCQCKGPDA	F12	P00748	MAD	-1	-0.9	FALSE
HTP0391A	Plasma	SciLifeLab peptide array	F2_HPRR350027	VRRQECSIPVCGQDQVTVAMTPRSEGSSVNLSPPLEQCVPDRGQQYQGRLAVTTHGLPCLAWASAQAKALSKHQDFNSAVQLVENFCRNPDGDEEGVWCYVAGKPGDFGYCDLNY	F2	P00734	MAD	0	4	FALSE
HTP0391A	Plasma	SciLifeLab peptide array	F2_HPRR3790030	EGVWCYVAGKPGDFGYCDLNYCEEAVEEETGDGLDEDSDRAIEGRTATSEYQTFFNPRTFGSGEADCGLRPLFEKKSLE	F2	P00734	MAD	10	22.5	FALSE
HTP0391A	Plasma	SciLifeLab peptide array	F2_HPRR3790031	FEALESSTATDVFWAKYTACETARTPRDKLAACLEGNCAEGLGTNYRGHVNITRSGIECQLWRSRYPHKPEINSTTHPGADLQ	F2	P00734	MAD	5	7.6	FALSE
HTP0391A	Plasma	SciLifeLab peptide array	F8_HPRR232500	FTQPLYRGELNEHLGLLGPYIRAEVEDNIMVTFRNQASRPYSFYSSLISYEEDQRQGAEPRKNFVKPNETKTYFWKVQHHMAPTKDEFDCKAWAYFSDVDLEKDVHSGLIGPLLVCHTNTLNPAHGRQVTVQEFAL	F8	P00451	MAD	4	4.1	FALSE
HTP0391A	Plasma	SciLifeLab peptide array	F8_HPRR232926	ESKAISDAQITASSYFTNMFATWSPSKARLHLQGRSNAWRPQVNNPKEWLQVDFQKTMKVTGVTTQGVKSLLTSMYVKEFLISSSQDGHQWTLFFQNGKVKVFQGNQDSFTPVVNSLDPPLLTRYLRIHPQSWVHQIALRMEVLGCEA	F8	P00451	MAD	0	0	FALSE
HTP0391A	Plasma	SciLifeLab peptide array	FARS2_HPRR2010057	GTPLFSVYDNLSPVVTTWQNFDSLLIPADHPSRKKGDNYYLNRTHMLRAHTSAHQWDLLHAGLDAFLVVGDVYRRDQIDSQHYPIFHQLEAVRLFSKHELFAGIKDGES	FARS2	O95363	MAD	0	1	FALSE
HTP0391A	Plasma	SciLifeLab peptide array	FARSA_HPRR400146	EVIEAELRSTKHWELTAEGEEIAREGSHEARVFRSIPPEGLAQSELMRLPSGKVGFSKAMSNKWIRVDKSAADGPRVFRVVDSMEDEVQRRLQLVRGGQAEKLGEKERSELRKRKLLAEVTLKTYWVSKG	FARSA	Q9Y285	MAD	-1	1	FALSE
HTP0391A	Plasma	SciLifeLab peptide array	FHL1_HPRR252319	RFTAVEDQYYCVDCYKNFVAKKCAGCKNPITGFGKGSSVVAYEGQSWHDYCFHCKIRRAPPLSNN	FHL1	Q13642	MAD	-2	-1	FALSE
HTP0391A	Plasma	SciLifeLab peptide array	FLG_HPRR2551092	SERWSGSASRNHLGSAWEQSRDGSRHPGSHHEDRAGHGHSADSSRQSGTRHTESSSRGQAASSHEQARSSAGERHGSRHQLQSA	FLG	P20930	MAD	1	12	FALSE
HTP0391A	Plasma	SciLifeLab peptide array	FLG_HPRR2551093	SADSSRQSGTPHAETSSGGQAASSHEQARSSPGERHGSRHQQSADSSRHSGIPRRQASSAVRDSGHWGSSGSQASDSEGHSEESDTQSVSGHGQDGPHQQSHQESAR	FLG	P20930	MAD	-1	1	FALSE
HTP0391A	Plasma	SciLifeLab peptide array	FLG_HPRR2551094	RKRLSERLEEKEDNEEGVYDYENTGRMTQKWIQSGHIATYYTIQDEAYDTTDSLLEENKIYERSRSSDGKSSSQVNRSRHENTSQVPLQESR	FLG	P20930	MAD	1	14	FALSE
HTP0391A	Plasma	SciLifeLab peptide array	FLNA_HPRR232447	VICVRFGGEHVPNSPFQVTALAGDQPSVQPPLRSQQLAPQYTYAQGGQQTWAPERPLVGVNGLDVTSLRPFDLVIPFTIKKGEITGEVRMPSGKVAQPTITDNKDGTVTVRYAPSEAGLHEMDIRYDNMHIPGSPLQFYVDYVNCGHVT	FLNA	P21333	MAD	0	2	FALSE
HTP0391A	Plasma	SciLifeLab peptide array	FLNB_HPRR1310070	HGKVGEAGLLSVDCSEAGPGALGLEAVSDSGTKAEVSIQNNKDGTYAVTYVPLTAGMYTLTMKYGGELVPHFPARVKVEPAVDTSRIKVFGPGIEGKDVFREATTDFTV	FLNB	O75369	MAD	-1	7.1	FALSE
HTP0391A	Plasma	SciLifeLab peptide array	FLNC_HPRR1310054	DPVPKSPFVVNVAPPLDLSKIKVQGLNSKVAVGQEQAFSVNTRGAGGQGQLDVRMTSPSRRPIPCKLEPGGGAEAQAVRYMPPEEGPYKVDITYDGHPVPGSPFAVEGVLPPDPSKVC	FLNC	Q14315	MAD	0	17.2	FALSE
HTP0391A	Plasma	SciLifeLab peptide array	FLNC_HPRR1310055	HSLHETSTVLVETVTKSSSSRGSSYSSIPKFSSDASKVVTRGPGLSQAFVGQKNSFTVDCSKAGTNMMMVGVHGPKTPCEEVYVKHMGNRVYNVTYTVKEKGDY	FLNC	Q14315	MAD	-1	2	FALSE
HTP0391A	Plasma	SciLifeLab peptide array	FN1_HPRR2050095	AQQMVQPQSPVAVSQSKPGCYDNGKHYQINQQWERTYLGNALVCTCYGGSRGFNCESKPEAEETCFDKYTGNTYRVGDTYERPKDSMIWDCTCIGAGRGRISCTIANRCHEGGQSYKIGDTWRRPHETGGYMLECVCLGNGKGEW	FN1	P02751	MAD	-1	1	FALSE
HTP0391A	Plasma	SciLifeLab peptide array	FN1_HPRR2050096	HEEICTTNEGVMYRIGDQWDKQHDMGHMMRCTCVGNGRGEWTCIAYSQLRDQCIVDDITYNVNDTFHKRHEEGHMLNCTCFGQGRGRWKCDPVDQCQDSETGTFYQIGDSWEKYVHGVRYQCYCYGRGIG	FN1	P02751	MAD	0	2	FALSE
HTP0391A	Plasma	SciLifeLab peptide array	FTCD_HPRR2280077	MRLPKNIPEEKDRRTAALQEGLRRAVSVPLTLAETVASLWLALQELARCGNLACRSDLQVAAKALEMGVFGAYFNVLINLRDITDEAFKDQIHHRV	FTCD	O95954	MAD	0	2	FALSE
HTP0391A	Plasma	SciLifeLab peptide array	FTCD_HPRR2890163	GVSVDECVLCAQAFGQRLAEELDVPVYLYGEAARMDSRRTLPAIRAGEYEALPKKLQQADWAPDFGPSSF	FTCD	O95954	MAD	108	115.6	FALSE
HTP0391A	Plasma	SciLifeLab peptide array	FTCD_HPRR2890164	MSQLVECVPNFSEGKNQEVIDAISGAITQTPGCVLLDVDAGPSTNRTVYTFVGPPECVVEGALNAARVASRLIDMSRHQGEH	FTCD	O95954	MAD	-1	4.1	FALSE
HTP0391A	Plasma	SciLifeLab peptide array	FTCD_HPRR2890165	TKEQAHRIALNLREQGRGKDQPGRLKKVQGIGWYLDEKNLAQVSTNLLDFEVTALHTVYEETCREAQELSLPVVGSQLVGLVPLKALLD	FTCD	O95954	MAD	0	1	FALSE
HTP0391A	Plasma	SciLifeLab peptide array	G6PC2_HPRR4090002	INSEMFLLSCRGGNNYTLSF	G6PC2	Q9NQR9	MAD	1	2	FALSE
[truncated: 66,041 more rows]
