# Supplementary material for: JAK inhibition decreases the autoimmune burden in Down syndrome
Source: eLife. 2024 Dec 31;13:RP99323. doi: 10.7554/eLife.99323 (PMC11687933; doi:10.7554/eLife.99323)
Supplement: Figure 4—source data 1. [file elife-99323-fig4-data1.xlsx]

## Sheet: Adverse Events
	Adverse Events
	Adverse Event by CTCAE 5.0 Code	n	% (n=13)	# Events	Not related to study drug	Possibly related to study drug	Definitely related to study drug
	Overall	8	61.5	39	21	18	0
	Gastrointestinal disorders	3	23.1	9	8	1	0
	Grade 1 Diarrhea	2	15.4	4	3	1	0
	Grade 1 Vomiting	2	15.4	5	5	0	0
	Skin disorders	5	38.5	9	7	2	0
	Grade 1 Rash Acneiform	2	15.4	2	1	1	0
	Grade 1 Pain of skin	1	7.7	1	1	0	0
	Grade 1 Skin and subcutaneous tissue disorders – Other	2	15.4	3	3	0	0
	Grade 2 Skin and subcutaneous tissue disorders – Other	1	7.7	1	1	0	0
	Grade 2 Skin infection	1	7.7	1	1	0	0
	Grade 2 Folliculitis	1	7.7	1	0	1	0
	Investigations (Laboratory Results)	2	15.4	3	0	3	0
	Grade 1 White blood cell decreased	1	7.7	1	0	1	0
	Grade 2 White blood cell decreased	1	7.7	1	0	1	0
	Grade 2 CPK increased	1	7.7	1	0	1	0
	Psychiatric Disorders	1	7.7	1	1	0	0
	Grade 1 Agitation	1	7.7	1	1	0	0
	Respiratory, Thoracic and Mediastinal Disorders	6	46.2	13	4	9	0
	Grade 1 Rhinorrhea (Runny nose)	3	23.1	3	1	2	0
	Grade 1 Cough	2	15.4	2	1	1	0
	Grade 1 Productive cough	1	7.7	1	0	1	0
	Grade 1 Sore throat	2	15.4	2	0	2	0
	Grade 1 Pleuritic pain	1	7.7	1	0	1	0
	Grade 1 Epistaxis (Bloody nose)	1	7.7	1	1	0	0
	Grade 1 Nasal Congestion	2	15.4	3	1	2	0
	Infections and Infestations	1	7.7	1	0	1	0
	Grade 2 Middle ear inflammation	1	7.7	1	0	1	0
	General Disorders	1	7.7	1	0	1	0
	Grade 1 Fatigue	1	7.7	1	0	1	0
	Nervous System Disorders	1	7.7	1	0	1	0
	Grade 1 Headache	1	7.7	1	0	1	0
	Injury, Poisoning and Procedural Complications	1	7.7	1	1	0	0
	Grade 2 Fracture	1	7.7	1	1	0	0
