# Supplementary material for: JAK inhibition decreases the autoimmune burden in Down syndrome
Source: eLife. 2024 Dec 31;13:RP99323. doi: 10.7554/eLife.99323 (PMC11687933; doi:10.7554/eLife.99323)
Supplement: Figure 5—source data 1. — (A) Investigator’s Global Assessment (IGA); (B) Dermatology Life Quality Index (DLQI); (C) Severity of Alopecia Tool (SALT); (D) Psoriasis Area and Severity Index (PASI); and (E) Eczema Area and Severity Index (EASI). [file elife-99323-fig5-data1.xlsx]

## Sheet: A. IGA
	Investigator’s Global Assessment (IGA) scores
	ParticipantID	Baseline	8 week	16 week
	AA1	5	7	6
	AA2	3	3	1
	AA3	4	3	3
	AA4	2	1	1
	AA5	3	3	3
	AA6	3	2	1
	HS1	3	3	3
	HS2	3	2	1
	HS3	4	3	3
	Ps1	4	4	1

## Sheet: B. DLQI
	Dermatology Life Quality Index (DLQI) scores
	ParticipantID	Baseline	8 week	16 week
	AA1	0	NA	0
	AA2	1	NA	0
	AA3	1	NA	0
	AA4	0	NA	0
	AA5	7	NA	0
	AA6	2	NA	0
	HS1	6	NA	0
	HS2	6	NA	3
	HS3	1	NA	2
	Ps1	6	NA	1

## Sheet: C. SALT
	Severity of Alopecia Tool (SALT) scores
	ParticipantID	Baseline	8 week	16 week
	AA1	100	100	100
	AA2	32	21	9
	AA3	66	37	21
	AA4	29	10	1
	AA5	92	60	56
	AA6	86	38	4
	HS1	NA	NA	NA
	HS2	NA	NA	NA
	HS3	NA	NA	NA
	Ps1	NA	NA	NA

## Sheet: D. PASI
	Psoriasis Area and Severity Index (PASI) scores
	ParticipantID	Baseline	8 week	16 week
	AA1	NA	NA	NA
	AA2	NA	NA	NA
	AA3	NA	NA	NA
	AA4	NA	NA	NA
	AA5	NA	NA	NA
	AA6	NA	NA	NA
	HS1	NA	NA	NA
	HS2	NA	NA	NA
	HS3	NA	NA	NA
	Ps1	6	0.7	0.4

## Sheet: E. EASI
	Eczema Area and Severity Index (EASI) scores
	ParticipantID	Baseline	8 week	16 week
	AA1	NA	NA	NA
	AA2	5.4	1.2	0
	AA3	NA	NA	NA
	AA4	NA	NA	NA
	AA5	NA	NA	NA
	AA6	NA	NA	NA
	HS1	NA	NA	NA
	HS2	NA	NA	NA
	HS3	1.8	0	0
	Ps1	NA	NA	NA
