# Supplementary material for: JAK inhibition decreases the autoimmune burden in Down syndrome
Source: eLife. 2024 Dec 31;13:RP99323. doi: 10.7554/eLife.99323 (PMC11687933; doi:10.7554/eLife.99323)
Supplement: Figure 6—source data 1. — (A) DS IFN scores; (B) Cytokine scores; (C) anti-thyroid peroxidase (TPO) titers; (D) anti-transglutaminase (TG) titers; and (E) anti-thyroid stimulating hormone receptor (TSHR) titers for clinical trial participants. See also Data Availability Statement for underlying raw data submitted to various data repositories. [file elife-99323-fig6-data1.xlsx]

## Sheet: A. IFN scores
	DS IFN scores
	ParticipantID	Baseline	2 week	8 week	16 week
	AA1	8.53448	1.13535	-7.76911	0.828882
	AA2	-3.93813	-3.37502	12.9642	-14.2942
	AA3	5.81964	-3.02575	NA	-3.43331
	AA4	6.72285	-0.602356	1.74187	20.9668
	AA5	6.51432	3.00707	-3.52585	3.49481
	AA6	-3.2134	-12.4269	-11.6531	-11.0394
	HS1	15.1257	4.9083	4.89668	-0.472726
	HS2	7.54138	-4.73766	-7.91418	-6.34953
	HS3	4.51321	-6.60674	-7.45365	-8.59582
	Ps1	16.5277	-6.46222	-9.00187	-12.1278

## Sheet: B. Cytokine scores
	Cytokine scores
	ParticipantID	Baseline	2 week	8 week	16 week
	AA1	5.67651	1.10675	1.01439	0.604116
	AA2	2.06412	1.98821	3.65021	-0.89718
	AA3	1.71463	1.53416	-0.402553	-0.582202
	AA4	0.331486	-2.56674	-0.0802929	3.51628
	AA5	3.08695	0.469677	1.43848	2.56981
	AA6	-2.79226	-5.18769	-4.17012	-4.82415
	HS1	2.31147	1.1509	-0.15934	-2.02815
	HS2	5.48247	1.37989	1.3638	0.977389
	HS3	1.2704	-1.96768	-4.21861	-1.90276
	Ps1	1.53412	-5.02518	-5.53822	-4.16647

## Sheet: C. anti-TPO
	anti-Thyroid peroxidase (TPO) titer (U/mL)
	ParticipantID	Baseline	8 week	16 week
	AA1	965	542	350
	AA2	NA	NA	28
	AA3	170	108	93
	AA4	4226	2668	1612
	AA5	9411	3471	1812
	AA6	226	204	156
	HS1	75	31	28
	HS2	169	124	85
	HS3	NA	NA	28
	Ps1	NA	NA	28

## Sheet: D. anti-TG
	anti-Transglutaminase (TG) titer (IU/mL)
	ParticipantID	Baseline	8 week	16 week
	AA1	NA	1	1
	AA2	NA	NA	1
	AA3	NA	3	2
	AA4	426	355	184
	AA5	333	120	58
	AA6	5	2	1
	HS1	NA	1	1
	HS2	NA	1	1
	HS3	NA	NA	1
	Ps1	NA	NA	1

## Sheet: E. anti-TSHR
	anti-TSH receptor titer (IU/mL)
	ParticipantID	Baseline	8 week	16 week
	AA1	NA	1.02	1.09
	AA2	NA	NA	0.9
	AA3	40	40	40
	AA4	23.97	26.93	26.59
	AA5	3.14	2.89	2.11
	AA6	NA	0.9	1.32
	HS1	NA	0.9	0.9
	HS2	NA	0.9	NA
	HS3	NA	NA	0.9
	Ps1	NA	NA	0.9
