# Supplementary material for: JAK inhibition decreases the autoimmune burden in Down syndrome
Source: eLife. 2024 Dec 31;13:RP99323. doi: 10.7554/eLife.99323 (PMC11687933; doi:10.7554/eLife.99323)
Supplement: Supplementary file 1. [file elife-99323-supp1.xlsx]

## Sheet: Cohort characteristics
	All HTP participants in this study
	Characteristic	Control, N = 1501	T21, N = 4461	p-value2
	Age (years)	29 (17, 41)	22 (13, 30)	3.32e-07
	Sex			0.000686
	Female	94 (63%)	208 (47%)
	Male	56 (37%)	238 (53%)
	Race			0.0456
	American Indian or Alaska Native	0 (0%)	4 (0.9%)
	Asian	5 (3.3%)	6 (1.4%)
	Black or African-American	5 (3.3%)	8 (1.8%)
	More than one race	7 (4.7%)	25 (5.7%)
	Native Hawaiian or Other Pacific Islander	0 (0%)	1 (0.2%)
	Other	11 (7.3%)	11 (2.5%)
	White	122 (81%)	382 (87%)
	Unknown	0	9
	Ethnicity			0.395
	Hispanic or Latino	22 (15%)	52 (12%)
	Not Hispanic or Latino	124 (85%)	370 (88%)
	Unknown	4	24
	1Median (IQR); n (%)
	2Wilcoxon rank sum test; Fisher's exact test
	Autoimmune conditions participants (T21 only)
	Characteristic	Control, N = 01	T21, N = 4411	p-value2
	Age (years)	NA	22 (13, 30)
	Sex			NA
	Female	0	206 (47%)
	Male	0	235 (53%)
	Race			NA
	American Indian or Alaska Native	0	3 (0.7%)
	Asian	0	6 (1.4%)
	Black or African-American	0	8 (1.9%)
	More than one race	0	24 (5.6%)
	Native Hawaiian or Other Pacific Islander	0	1 (0.2%)
	Other	0	11 (2.5%)
	White	0	379 (88%)
	Unknown	0	9
	Ethnicity			NA
	Hispanic or Latino	0	51 (12%)
	Not Hispanic or Latino	0	366 (88%)
	Unknown	0	24
	1Median (IQR); n (%)
	2Fisher's exact test
	Anti-TPO autoantibody participants (T21 only)
	Characteristic	Control, N = 01	T21, N = 4041	p-value2
	Age (years)	NA	23 (14, 31)
	Sex			NA
	Female	0	179 (44%)
	Male	0	225 (56%)
	Race			NA
	American Indian or Alaska Native	0	4 (1.0%)
	Asian	0	6 (1.5%)
	Black or African-American	0	7 (1.8%)
	More than one race	0	22 (5.6%)
	Native Hawaiian or Other Pacific Islander	0	1 (0.3%)
	Other	0	10 (2.5%)
	White	0	345 (87%)
	Unknown	0	9
	Ethnicity			NA
	Hispanic or Latino	0	49 (13%)
	Not Hispanic or Latino	0	333 (87%)
	Unknown	0	22
	1Median (IQR); n (%)
	2Fisher's exact test
	Anti-nuclear antigen (ANA) autoantibody participants (T21 only)
	Characteristic	Control, N = 01	T21, N = 2151	p-value2
	Age (years)	NA	26 (19, 33)
	Sex			NA
	Female	0	110 (51%)
	Male	0	105 (49%)
	Race			NA
	American Indian or Alaska Native	0	1 (0.5%)
	Asian	0	2 (1.0%)
	Black or African-American	0	3 (1.4%)
	More than one race	0	13 (6.2%)
	Other	0	5 (2.4%)
	White	0	184 (88%)
	Unknown	0	7
	Ethnicity			NA
	Hispanic or Latino	0	26 (13%)
	Not Hispanic or Latino	0	178 (87%)
	Unknown	0	11
	1Median (IQR); n (%)
	2Fisher's exact test
	SciLifeLab autoantibody profiling participants
	Characteristic	Control, N = 601	T21, N = 1201	p-value2
	Age (years)	34 (27, 45)	28 (22, 35)	7.12e-05
	Sex			0.755
	Female	30 (50%)	63 (52%)
	Male	30 (50%)	57 (48%)
	Race			0.854
	American Indian or Alaska Native	0 (0%)	1 (0.8%)
	More than one race	3 (5.0%)	5 (4.2%)
	Native Hawaiian or Other Pacific Islander	0 (0%)	1 (0.8%)
	Other	3 (5.0%)	3 (2.5%)
	White	54 (90%)	110 (92%)
	Ethnicity			0.641
	Hispanic or Latino	9 (15%)	14 (12%)
	Not Hispanic or Latino	51 (85%)	101 (88%)
	Unknown	0	5
	1Median (IQR); n (%)
	2Wilcoxon rank sum test; Fisher's exact test
	Mass cytometry participants
	Characteristic	Control, N = 961	T21, N = 2921	p-value2
	Age (years)	26 (14, 37)	24 (16, 32)	0.19
	Sex			0.195
	Female	53 (55%)	137 (47%)
	Male	43 (45%)	155 (53%)
	Race			0.134
	American Indian or Alaska Native	0 (0%)	3 (1.1%)
	Asian	3 (3.1%)	4 (1.4%)
	Black or African-American	3 (3.1%)	6 (2.1%)
	More than one race	3 (3.1%)	13 (4.6%)
	Native Hawaiian or Other Pacific Islander	0 (0%)	1 (0.4%)
	Other	8 (8.3%)	7 (2.5%)
	White	79 (82%)	250 (88%)
	Unknown	0	8
	Ethnicity			0.611
	Hispanic or Latino	15 (16%)	38 (14%)
	Not Hispanic or Latino	79 (84%)	238 (86%)
	Unknown	2	16
	1Median (IQR); n (%)
	2Wilcoxon rank sum test; Fisher's exact test
	Whole blood RNA-seq participants
	Characteristic	Control, N = 961	T21, N = 3041	p-value2
	Age (years)	28 (14, 39)	23 (15, 32)	0.0247
	Sex			0.199
	Female	52 (54%)	141 (46%)
	Male	44 (46%)	163 (54%)
	Race			0.0834
	American Indian or Alaska Native	0 (0%)	3 (1.0%)
	Asian	3 (3.1%)	3 (1.0%)
	Black or African-American	3 (3.1%)	7 (2.4%)
	More than one race	3 (3.1%)	15 (5.1%)
	Native Hawaiian or Other Pacific Islander	0 (0%)	1 (0.3%)
	Other	8 (8.3%)	7 (2.4%)
	White	79 (82%)	260 (88%)
	Unknown	0	8
	Ethnicity			0.865
	Hispanic or Latino	14 (15%)	40 (14%)
	Not Hispanic or Latino	80 (85%)	247 (86%)
	Unknown	2	17
	1Median (IQR); n (%)
	2Wilcoxon rank sum test; Fisher's exact test
	Plasma immune markers (MSD) participants
	Characteristic	Control, N = 1311	T21, N = 3461	p-value2
	Age (years)	29 (16, 40)	22 (14, 31)	5.31e-05
	Sex			0.000139
	Female	86 (66%)	159 (46%)
	Male	45 (34%)	187 (54%)
	Race			0.0204
	American Indian or Alaska Native	0 (0%)	3 (0.9%)
	Asian	5 (3.8%)	4 (1.2%)
	Black or African-American	5 (3.8%)	7 (2.1%)
	More than one race	7 (5.3%)	15 (4.5%)
	Native Hawaiian or Other Pacific Islander	0 (0%)	1 (0.3%)
	Other	11 (8.4%)	9 (2.7%)
	White	103 (79%)	298 (88%)
	Unknown	0	9
	Ethnicity			0.763
	Hispanic or Latino	19 (15%)	44 (14%)
	Not Hispanic or Latino	108 (85%)	281 (86%)
	Unknown	4	21
	1Median (IQR); n (%)
	2Wilcoxon rank sum test; Fisher's exact test
