# Supplementary material for: JAK inhibition decreases the autoimmune burden in Down syndrome
Source: eLife. 2024 Dec 31;13:RP99323. doi: 10.7554/eLife.99323 (PMC11687933; doi:10.7554/eLife.99323)
Supplement: Supplementary file 2. — (A) Minimum qualifying scores for skin conditions. (B) Cohort characteristics for clinical trial participants. [file elife-99323-supp2.xlsx]

## Sheet: A. Minimum Qualifying Scores
	Immune skin condition eligibility criteria
	Condition	Assessment	Minimum score
	Moderate-to-severe atopic dermatitis	Eczema Area and Severity Index (EASI)	≥ 16
	Alopecia areata affecting at least 25% of the scalp	Severity of Alopecia Tool (SALT)	≥ 25
	Moderate-to-severe hidradenitis suppurativa	Hidradenitis suppurativa Physician’s Global Assessment (HS-PGA)	≥ 3
	Moderate-to-severe psoriasis	Psoriasis Area and Severity Index (PASI)	≥ 10
	Moderate-to-severe vitiligo	Vitiligo Extent Tensity Index (VETI)	≥ 2

## Sheet: B. Cohort characteristics
	Clinical trial enrollment
	Characteristic	Expected	Actual
	Sex	n (%)	n (%*)
	Male	23** (50.0)	13 (54.2)
	Female	23** (50.0)	11 (45.8)
	Other/Not reported	0 (0.0)	0 (0.0)
	Ethnicity	n (%)	n (%*)
	Hispanic or Latino	10 (22.3)	8 (33.3)
	Not Hispanic or Latino	37 (77.7)	16 (66.7)
	Other/Not reported	0 (0.0)	0 (0.0)
	Race	n (%)^	n (%*)
	American Indian or Alaska Native	0 (1.7)	0 (0.0)
	Asian	2 (3.6)	0 (0.0)
	Native Hawaiian or other Pacific Islander	0 (0.2)	0 (0.0)
	Black or African American	2 (4.7)	0 (0.0)
	White	41 (86.5)	23 (95.8)
	More than one race	2 (3.3)	1 (4.2)
	Other/Not reported	0 (0.0)	0 (0.0)
	Age at Enrollment (years)
	Mean	22.5
	Standard Deviation	6.1
	Median	21.7
	Minimum	12.9
	Maximum		38.2
